# Supplementary material for: Stereoselective Synthesis and Investigation of Isopulegol-Based Chiral Ligands
Source: MDPI journal article supplement (doi:10.3390/ijms20164050), 2019-08-19

**Supporting informations**  
**for**  
**Synthesis and transformation of isopulegol-based**  
**chiral ligands**

**Tam Minh Le**<sup>1</sup>, **Tamás Szilasi**<sup>1</sup>, **Volford Bettina**<sup>3</sup>, **Szekeres Ándras**<sup>3</sup>, **Ferenc Fülöp**<sup>1,2</sup> and **Zsolt Szakonyi**<sup>1,4\*</sup>

<sup>1</sup> Institute of Pharmaceutical Chemistry, University of Szeged, H-6720 Szeged, Eötvös utca 6, Hungary;  
leminhtam@pharm.u-szeged.hu; szilasitomi19@gmail.com; fulop@pharm.u-szeged.hu

<sup>2</sup> Stereochemistry Research Group of the Hungarian Academy of Sciences, H-6720 Szeged, Eötvös utca 6,  
Hungary

<sup>3</sup> Department of Microbiology, University of Szeged, 6726 Szeged, Közép fasor 52, Hungary;  
bettina.volford86@gmail.com; andras.j.szekeres@gmail.com

<sup>4</sup> Interdisciplinary Centre of Natural Products, University of Szeged, H-6720 Szeged, Eötvös utca 6, Hungary

\* Correspondence: szakonyi@pharm.u-szeged.hu; Tel.: +36-62-546809; Fax: +36-62-545705

## Contents

|                                                             |         |
|-------------------------------------------------------------|---------|
| $^1\text{H}$ , $^{13}\text{C}$ NMR spectra of new compounds | 3 - 133 |
|-------------------------------------------------------------|---------|

<sup>1</sup>H-NMR of compound **8**

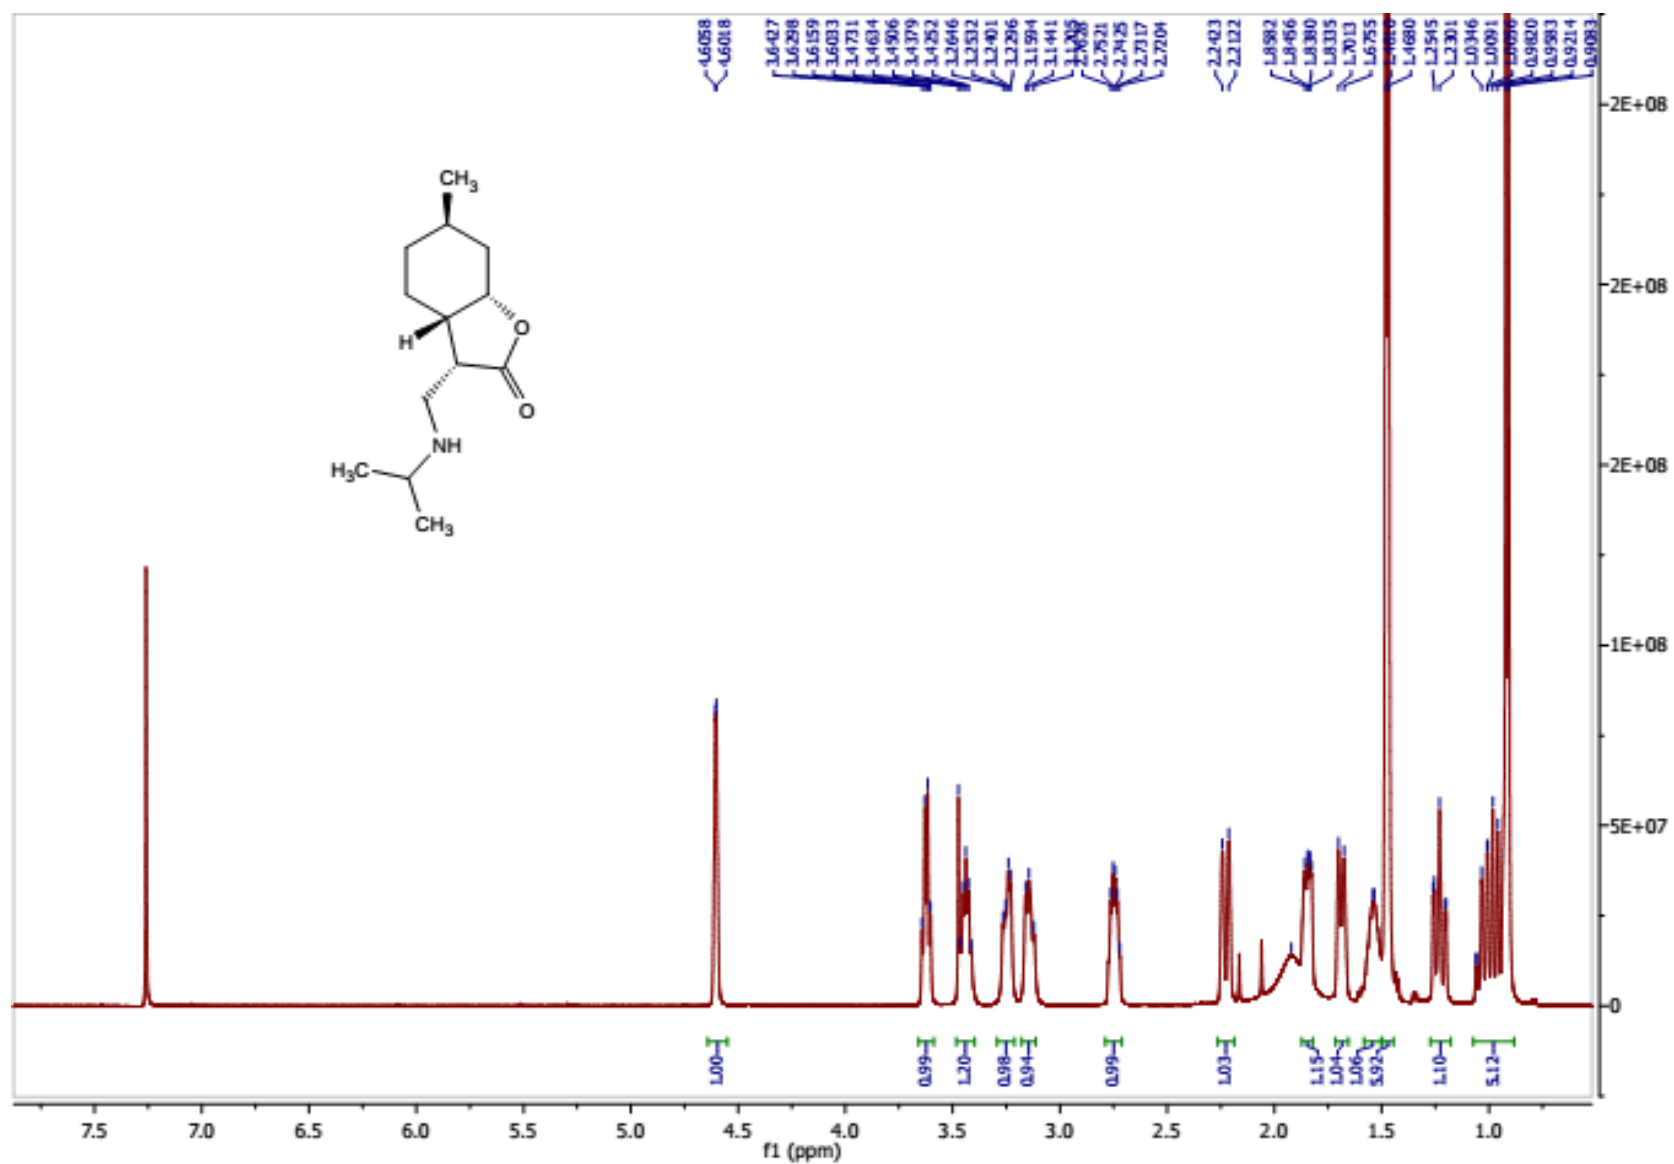

$^{13}\text{C}$ -NMR of compound **8**

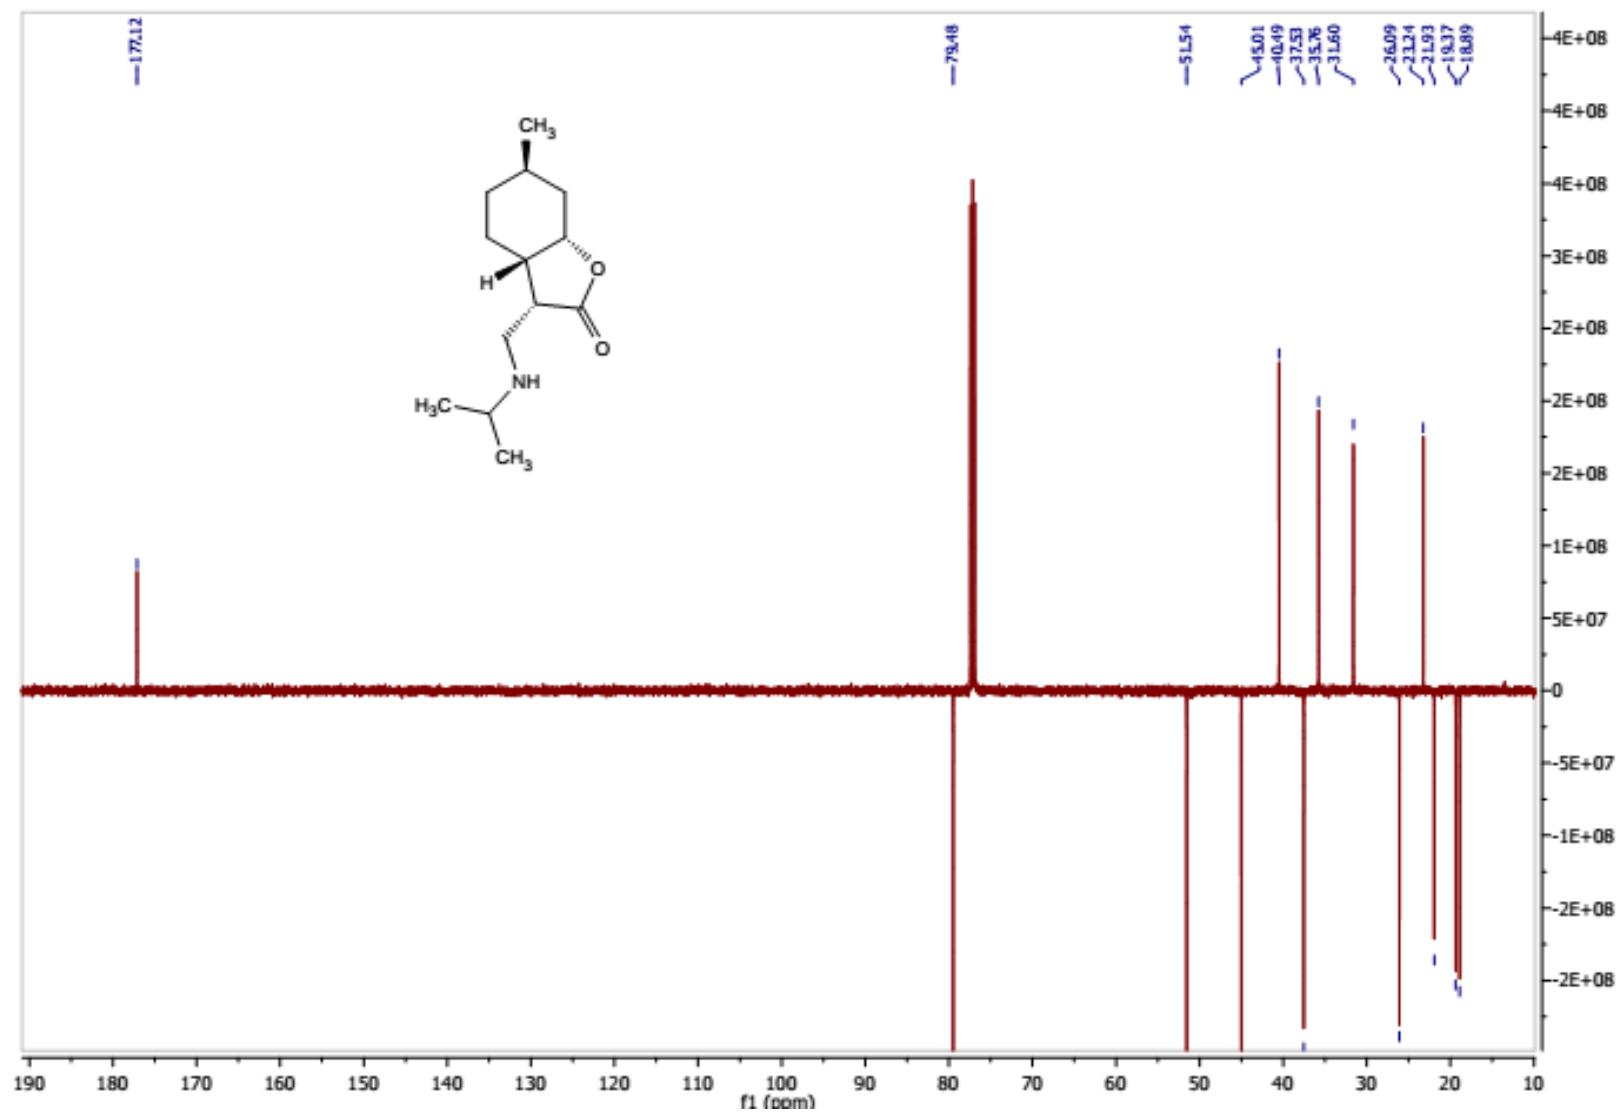

<sup>1</sup>H-NMR of compound **9**

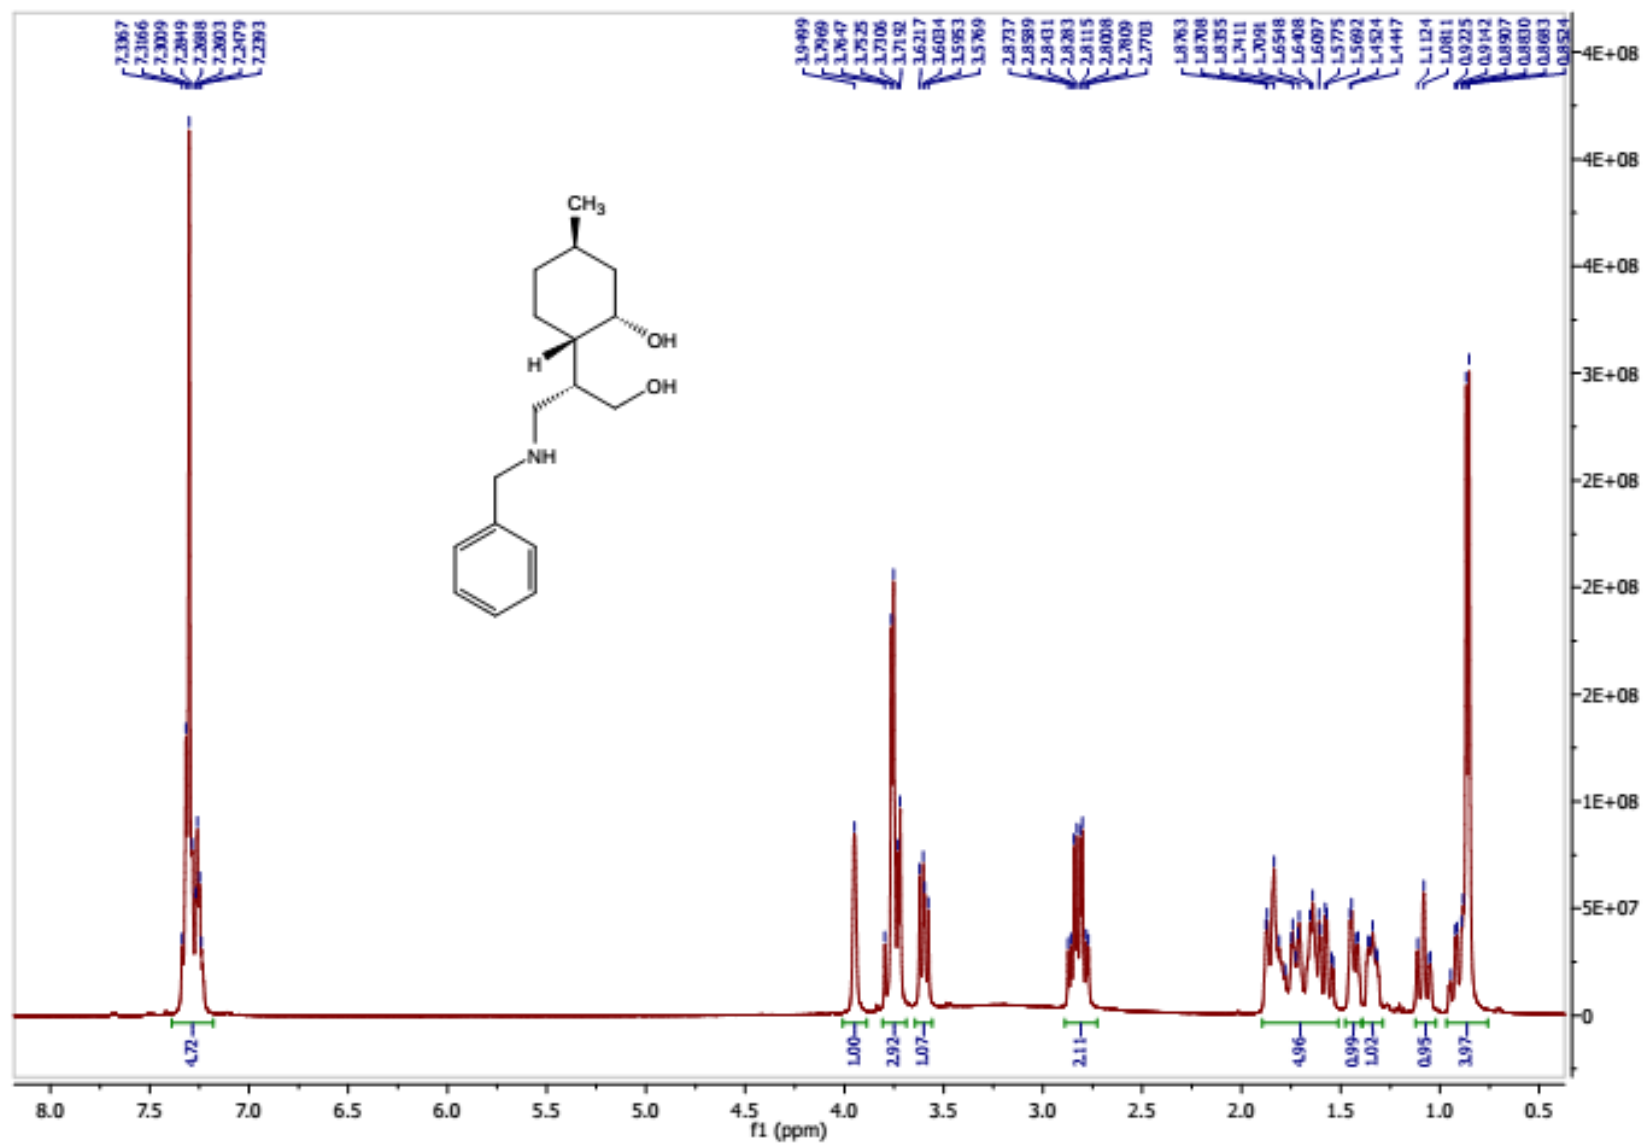

$^{13}\text{C}$ -NMR of compound **9**

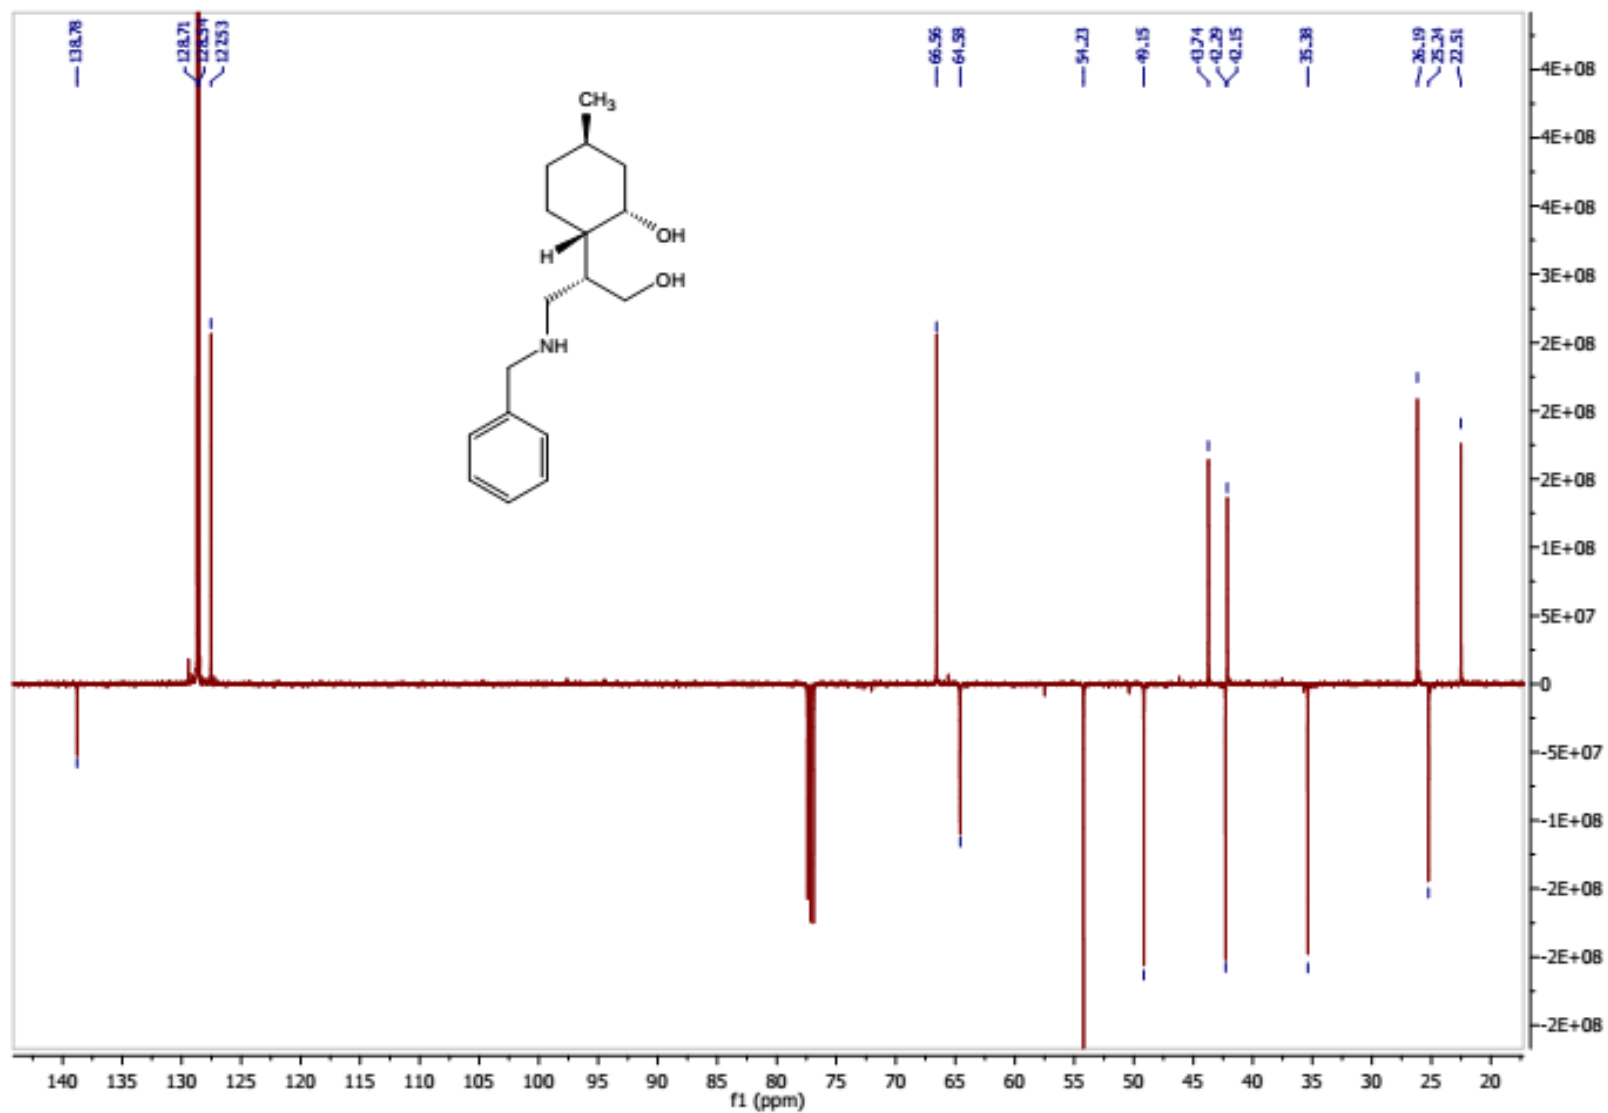

$^1\text{H-NMR}$  of compound **10**

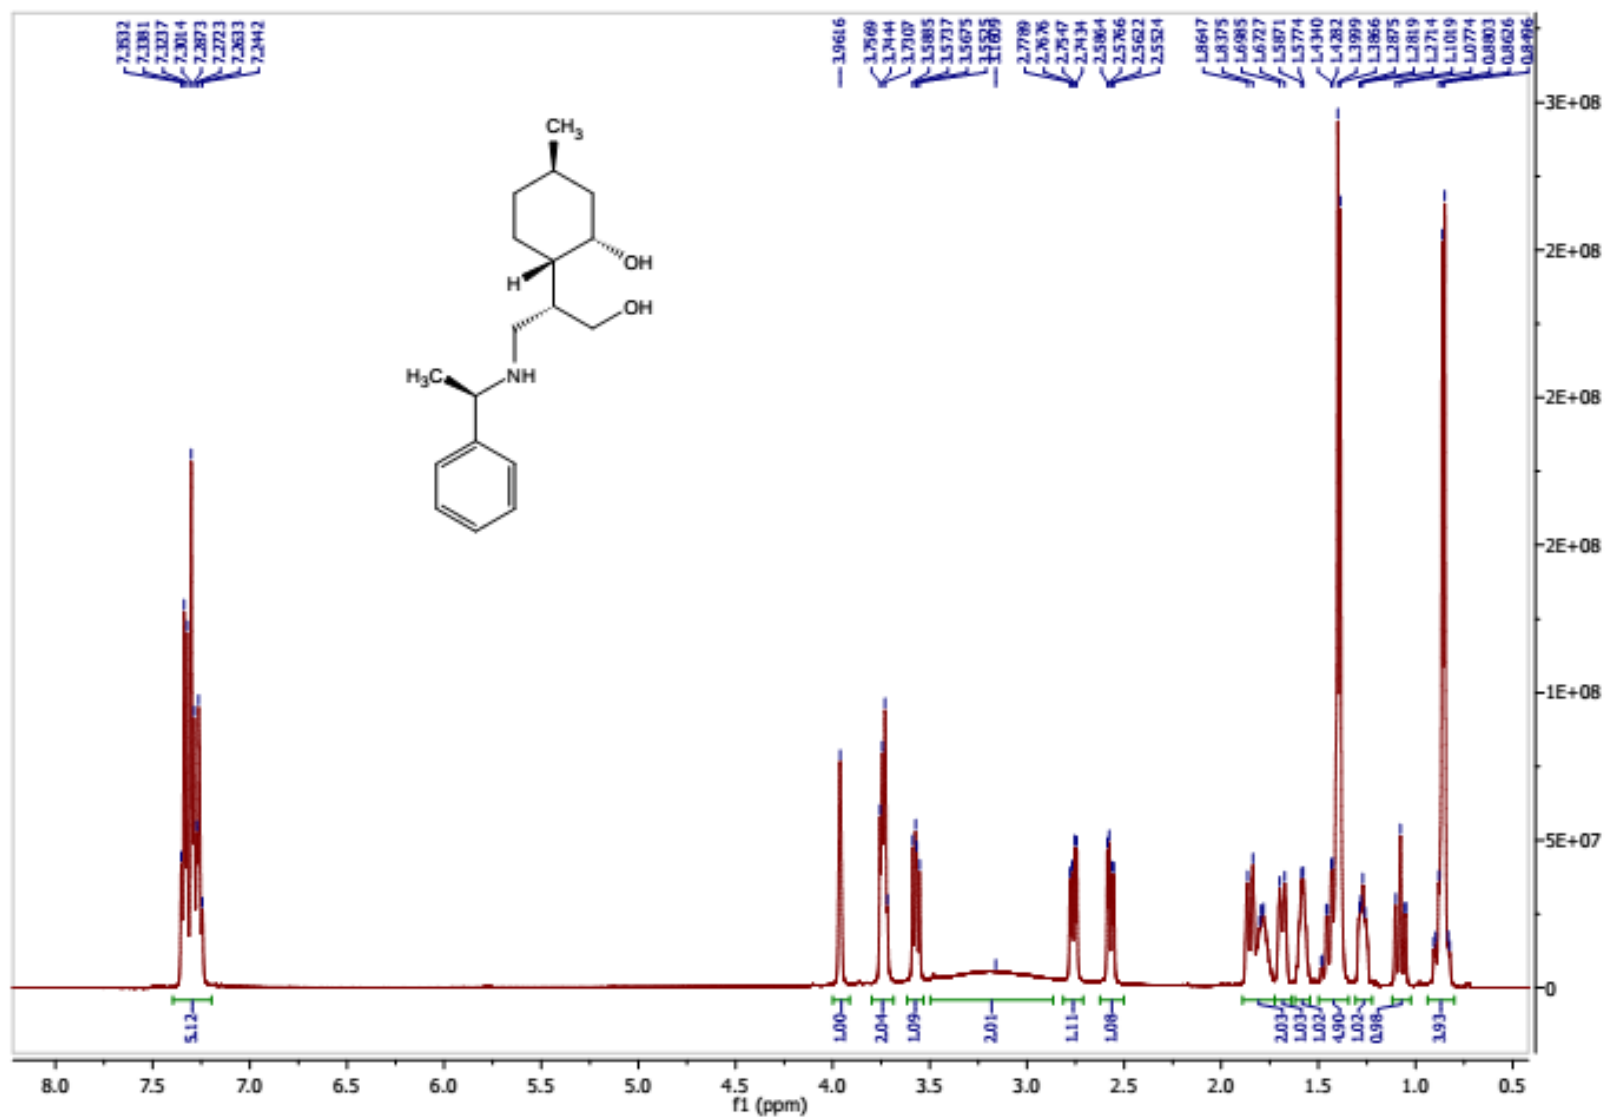

$^{13}\text{C}$ -NMR of compound **10**

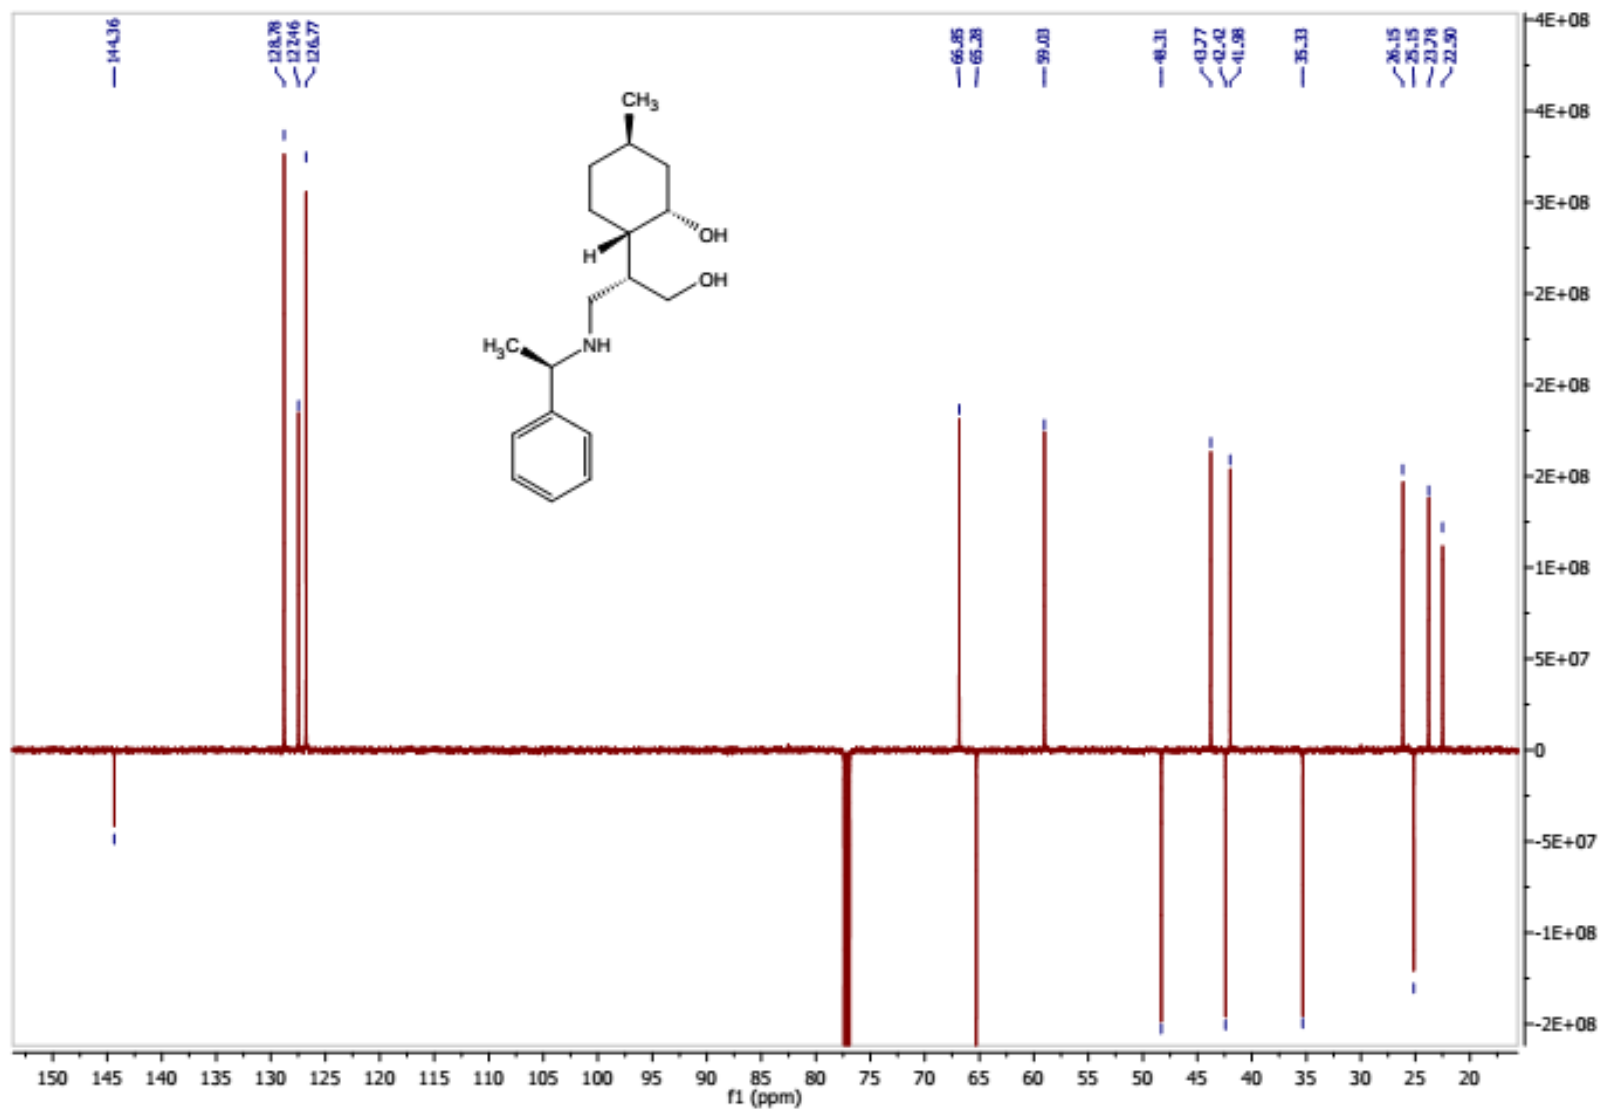



$^1\text{H-NMR}$  of compound **11**

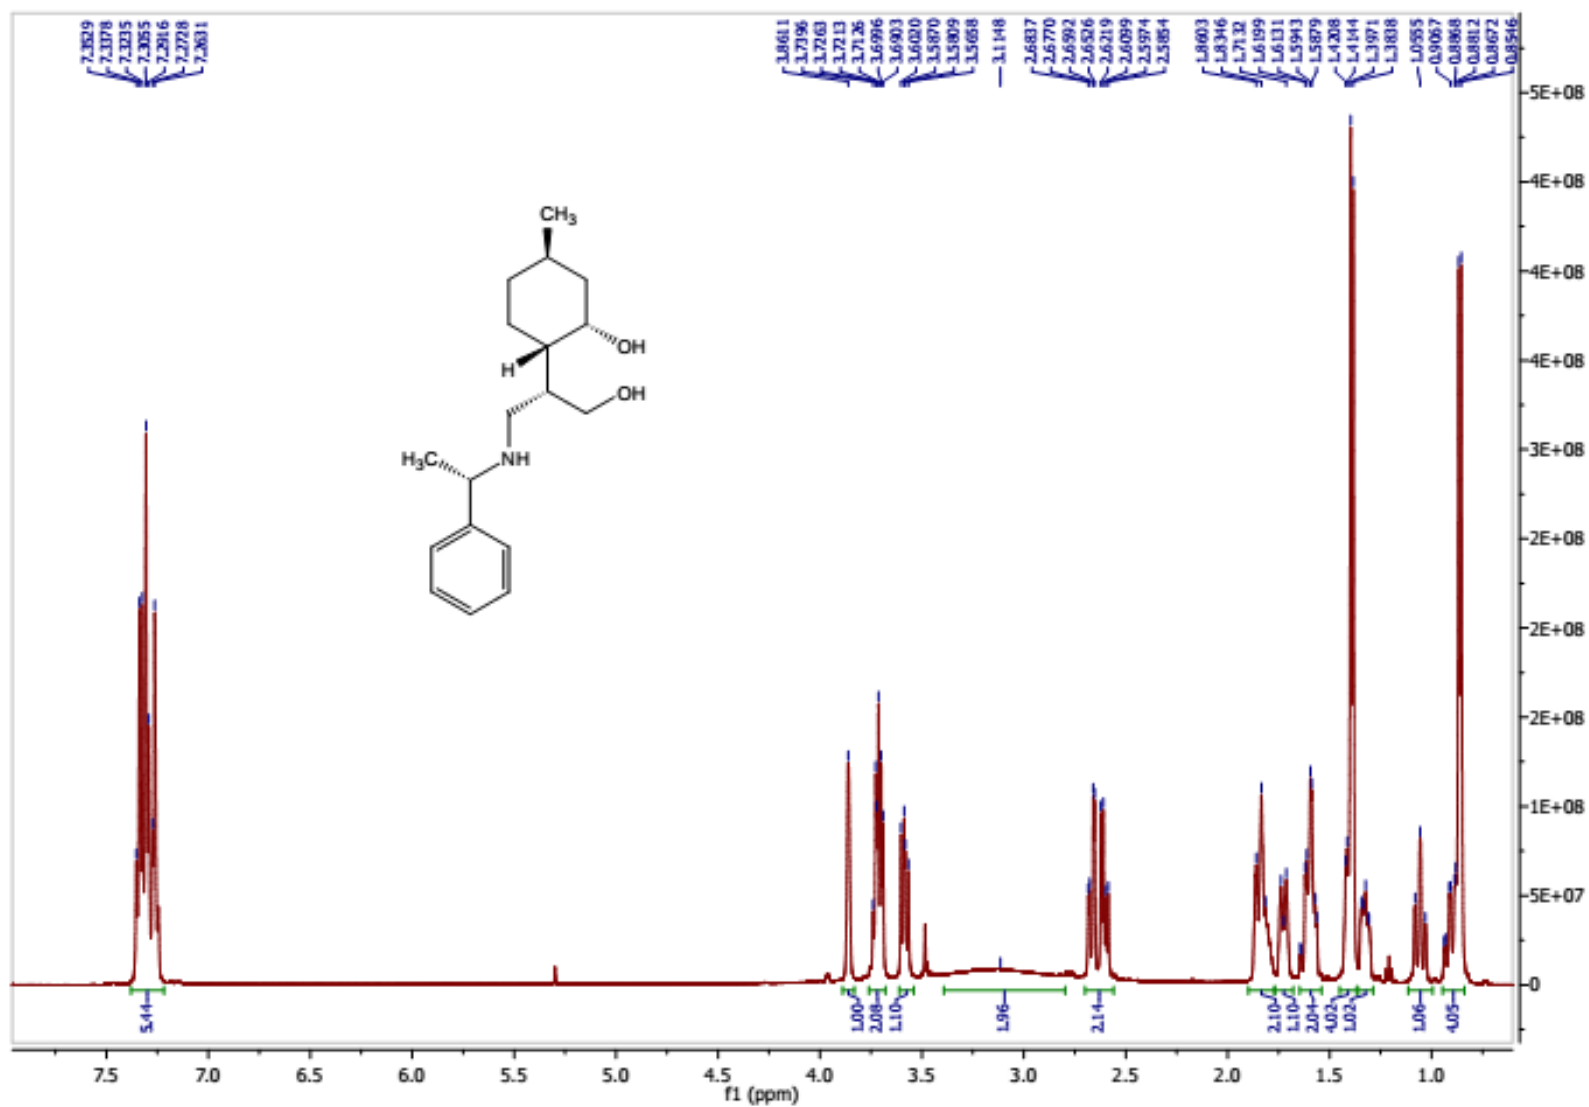

$^{13}\text{C}$ -NMR of compound **11**

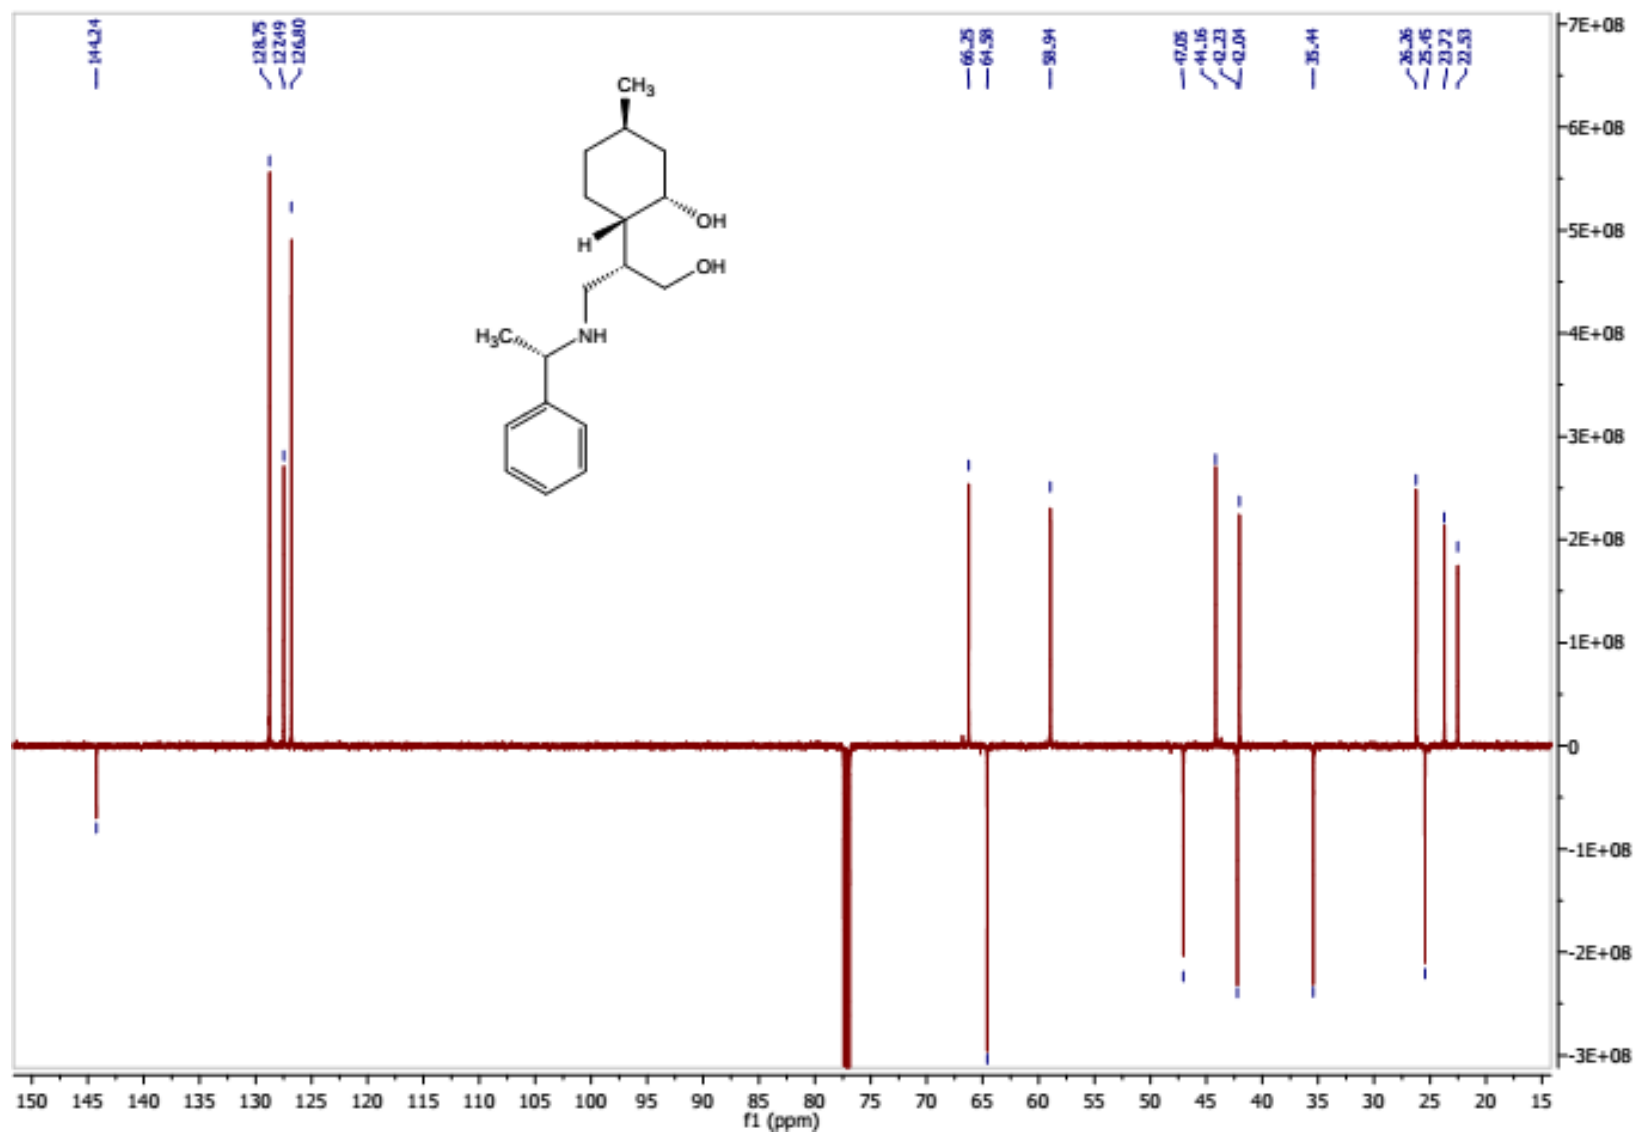

$^1\text{H-NMR}$  of compound **12**

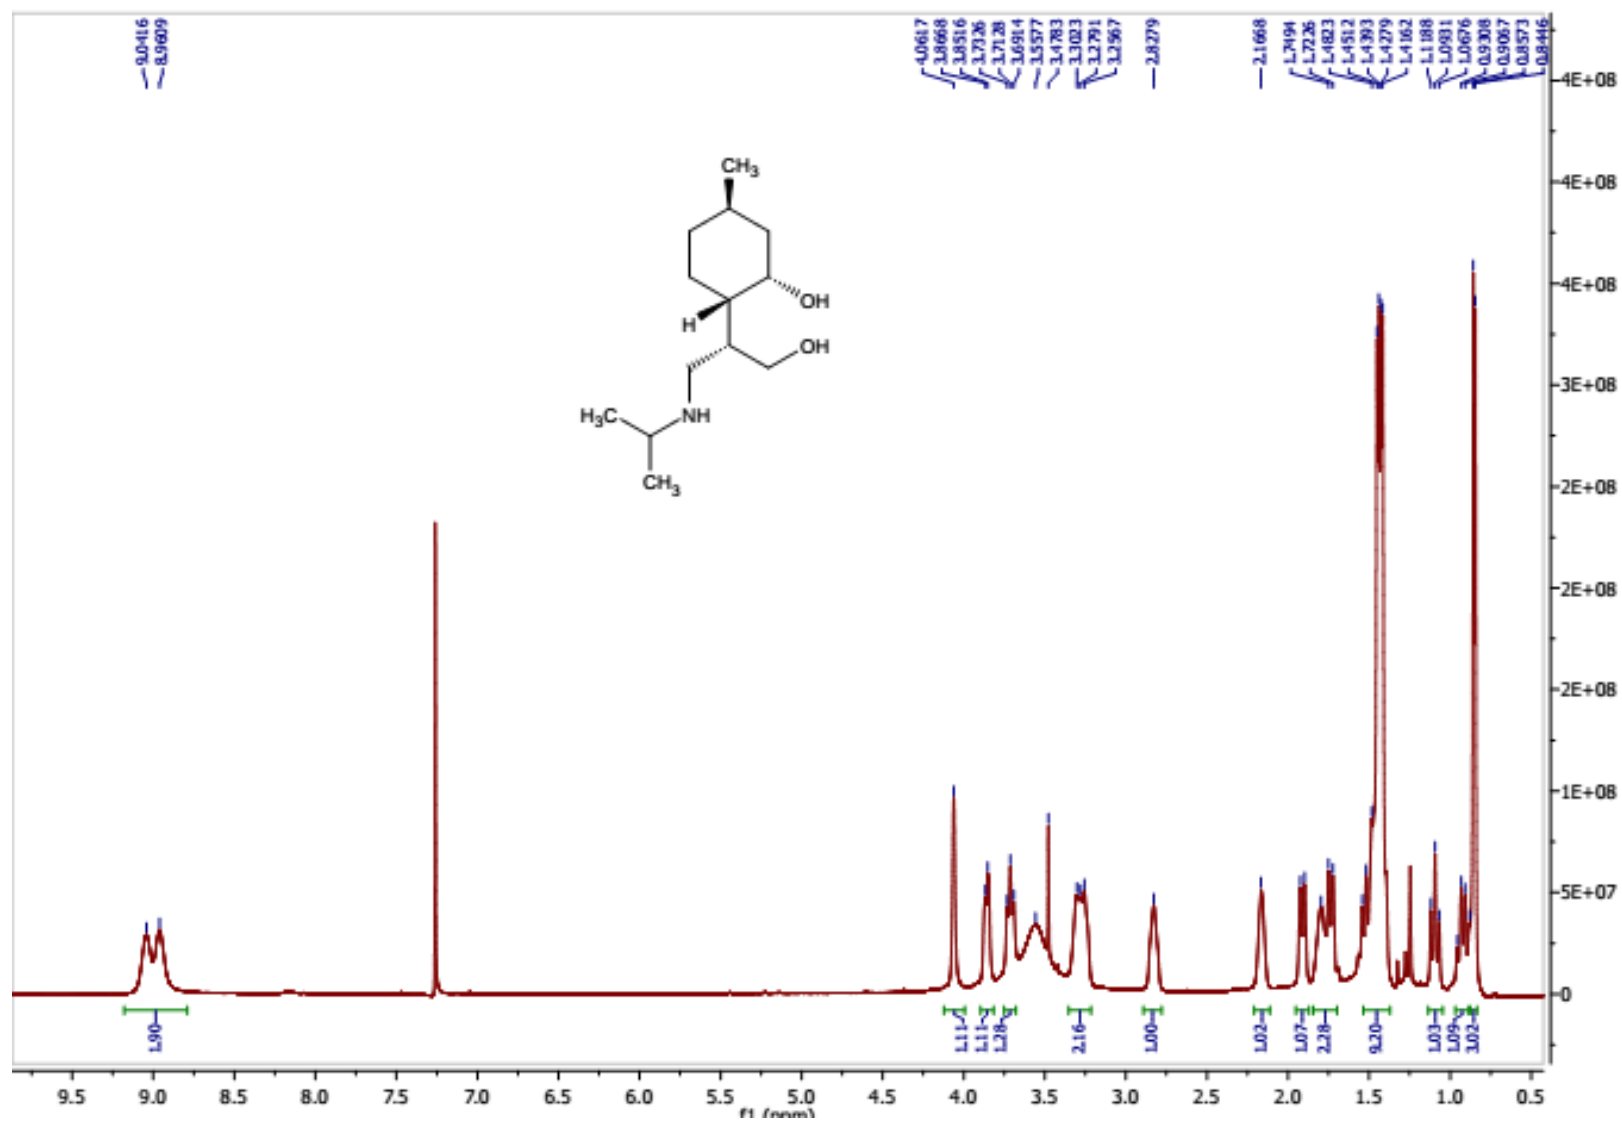

$^{13}\text{C}$ -NMR of compound **12**

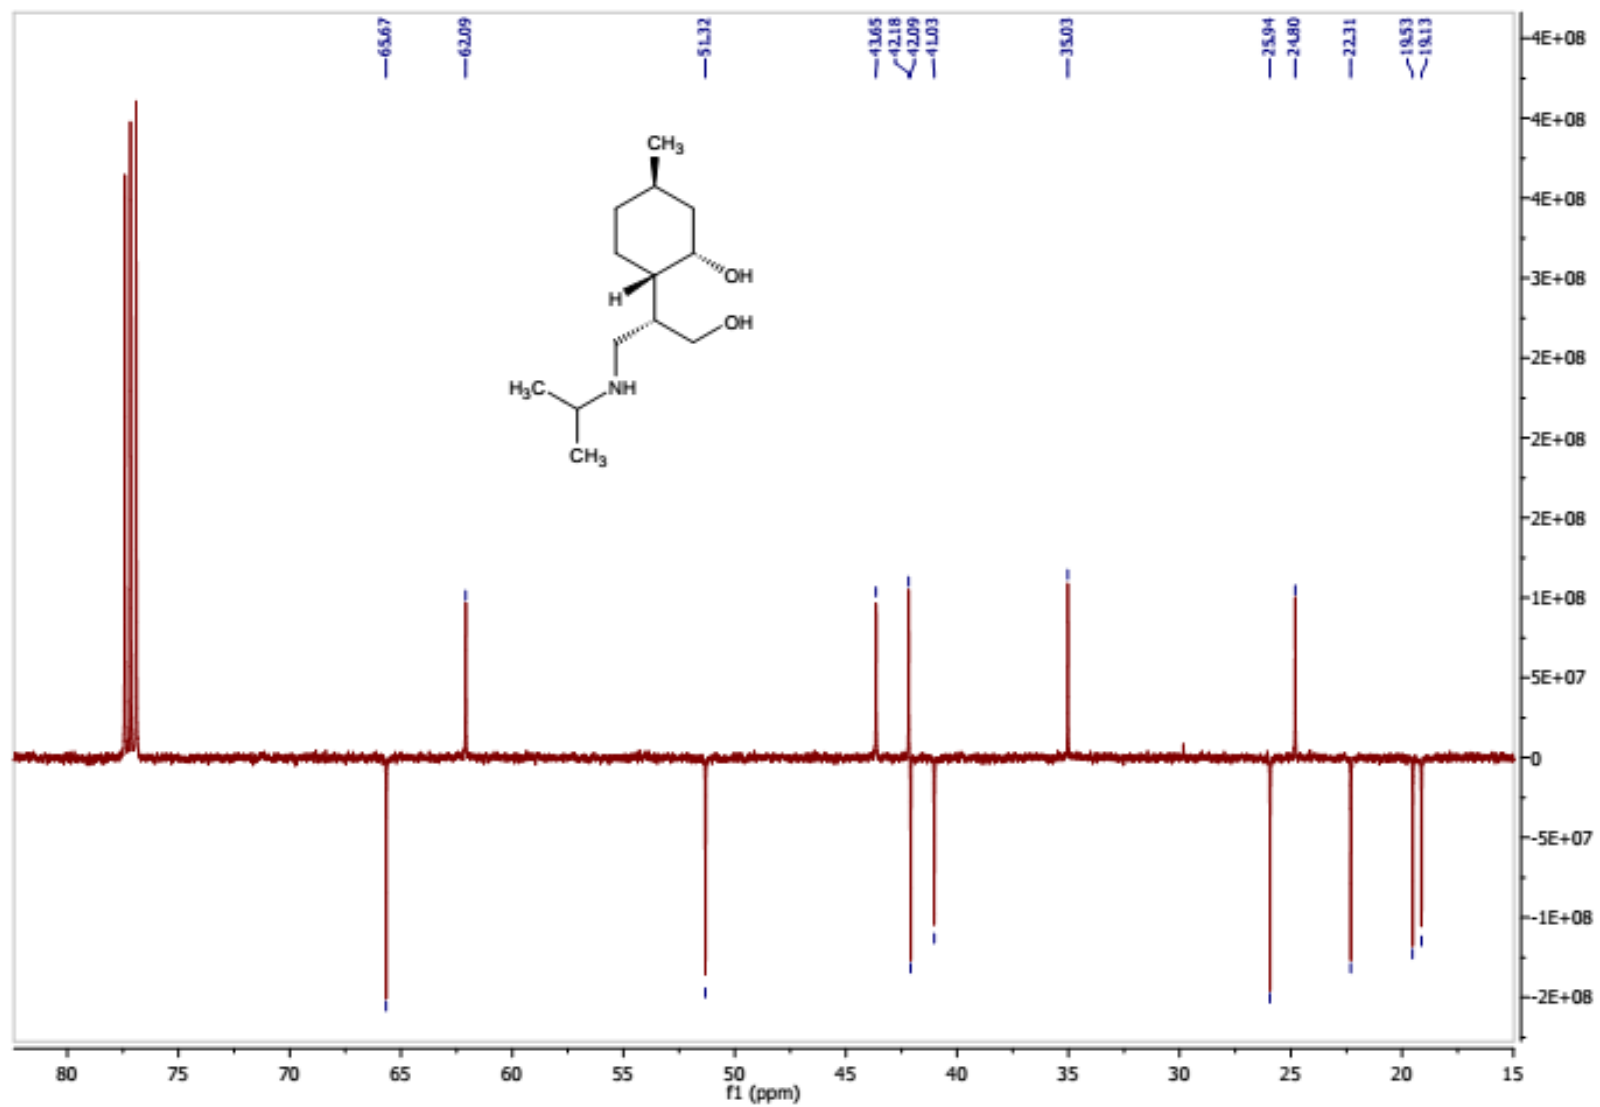

$^1\text{H-NMR}$  of compound **13**

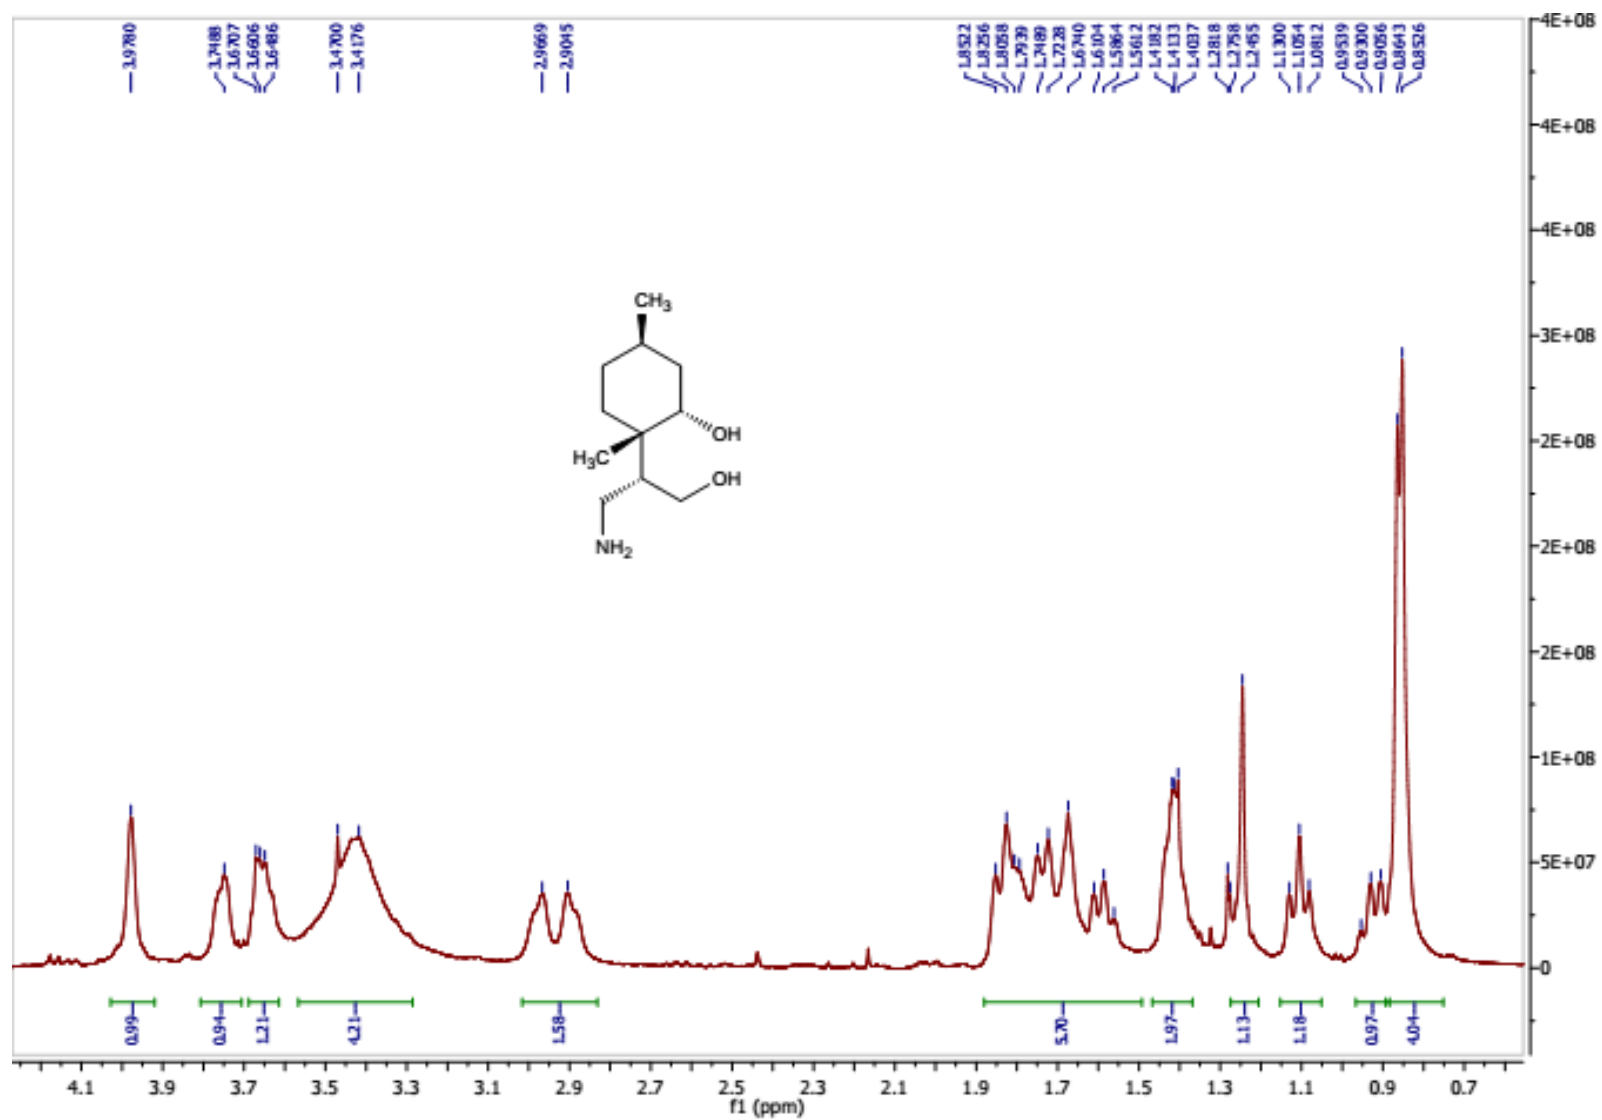

$^{13}\text{C}$ -NMR of compound **13**

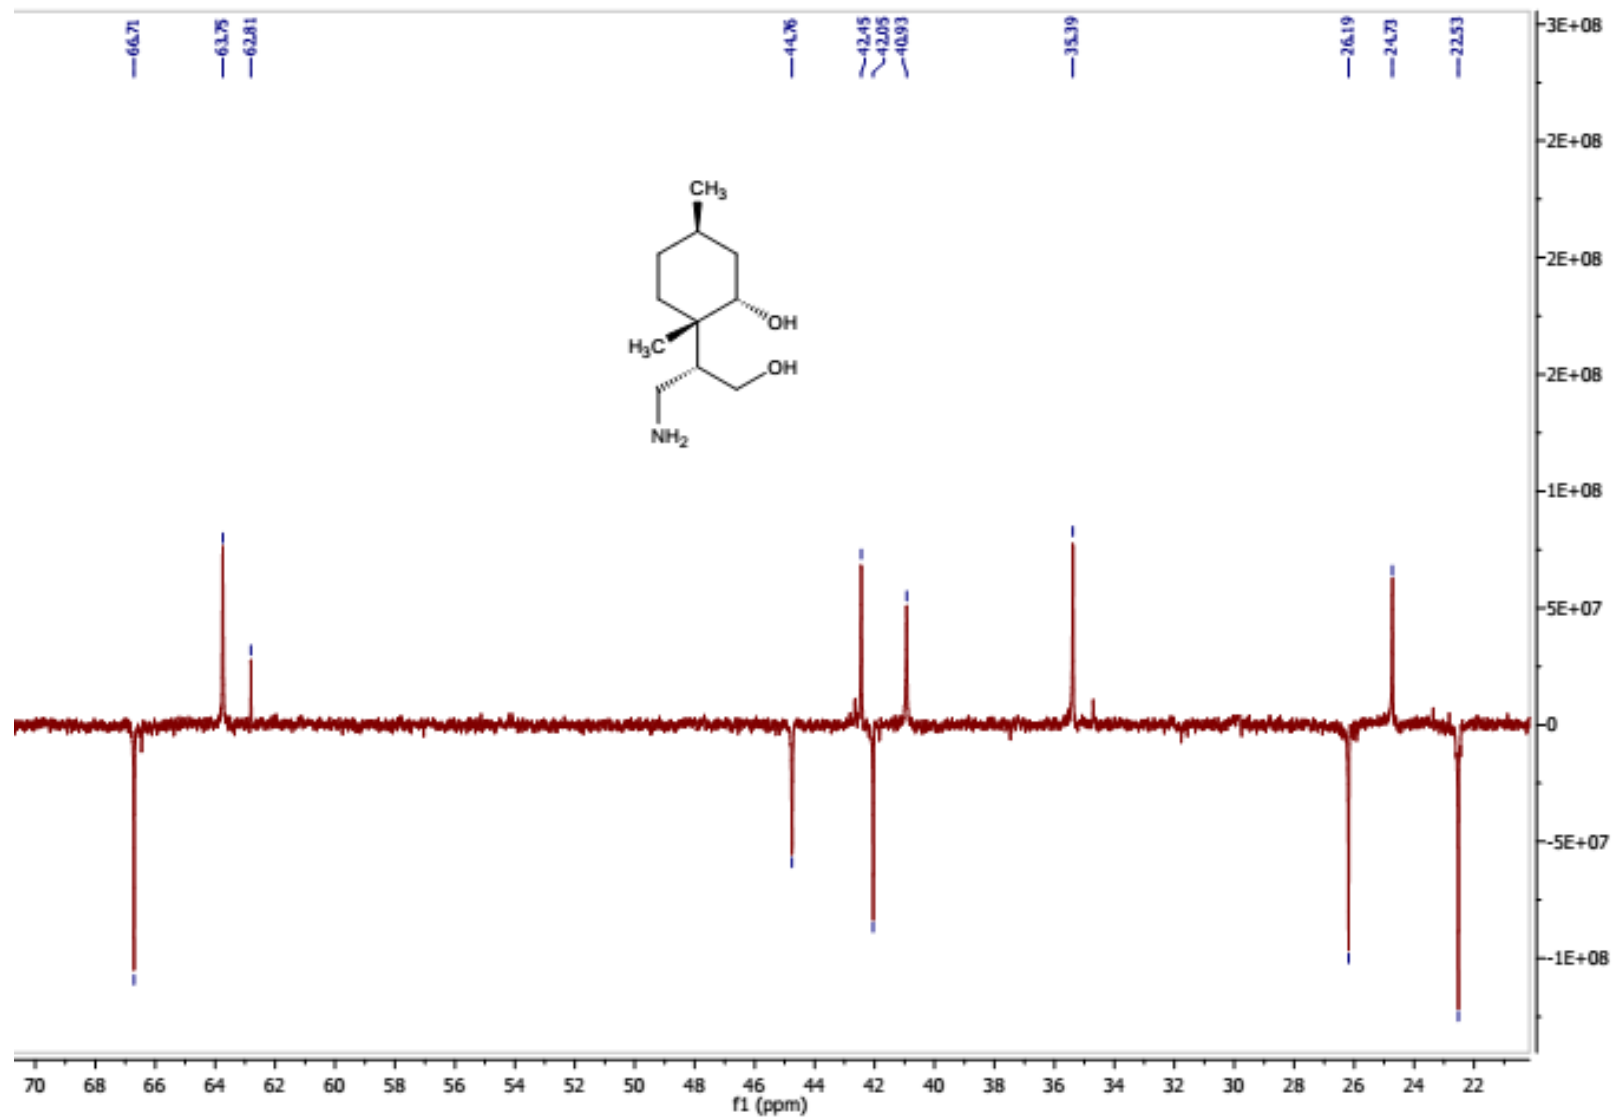

<sup>1</sup>H-NMR of compound **14**

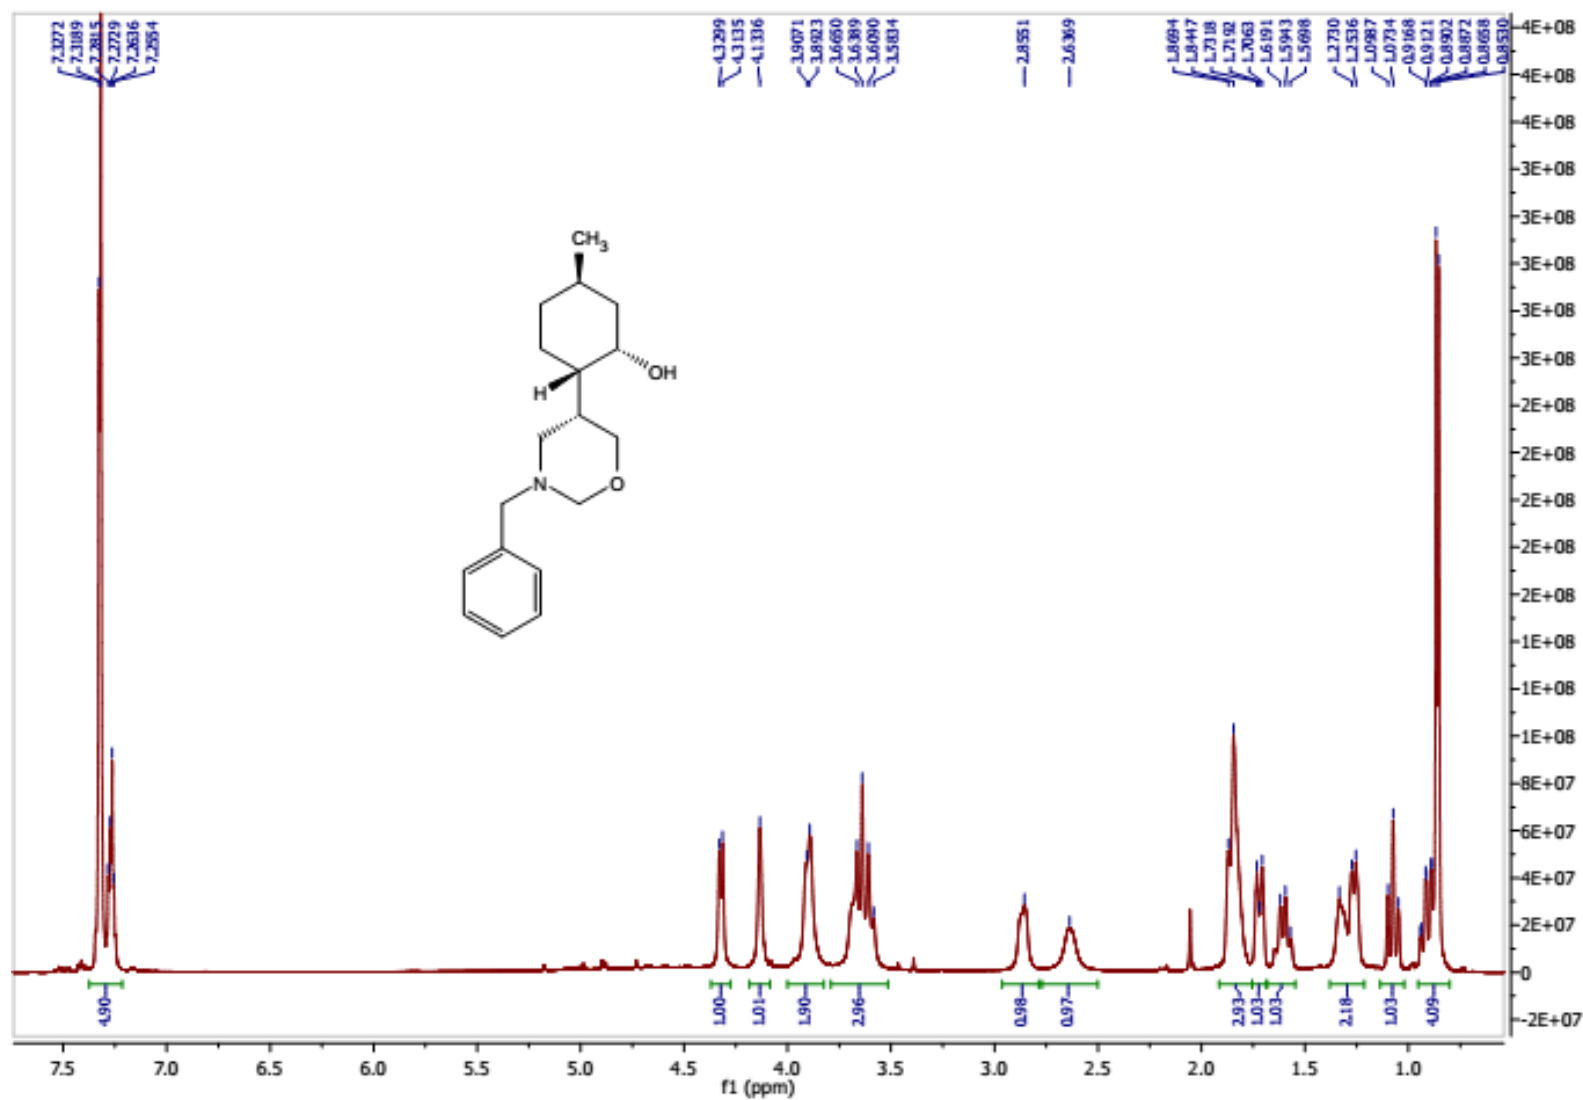

$^{13}\text{C}$ -NMR of compound 14

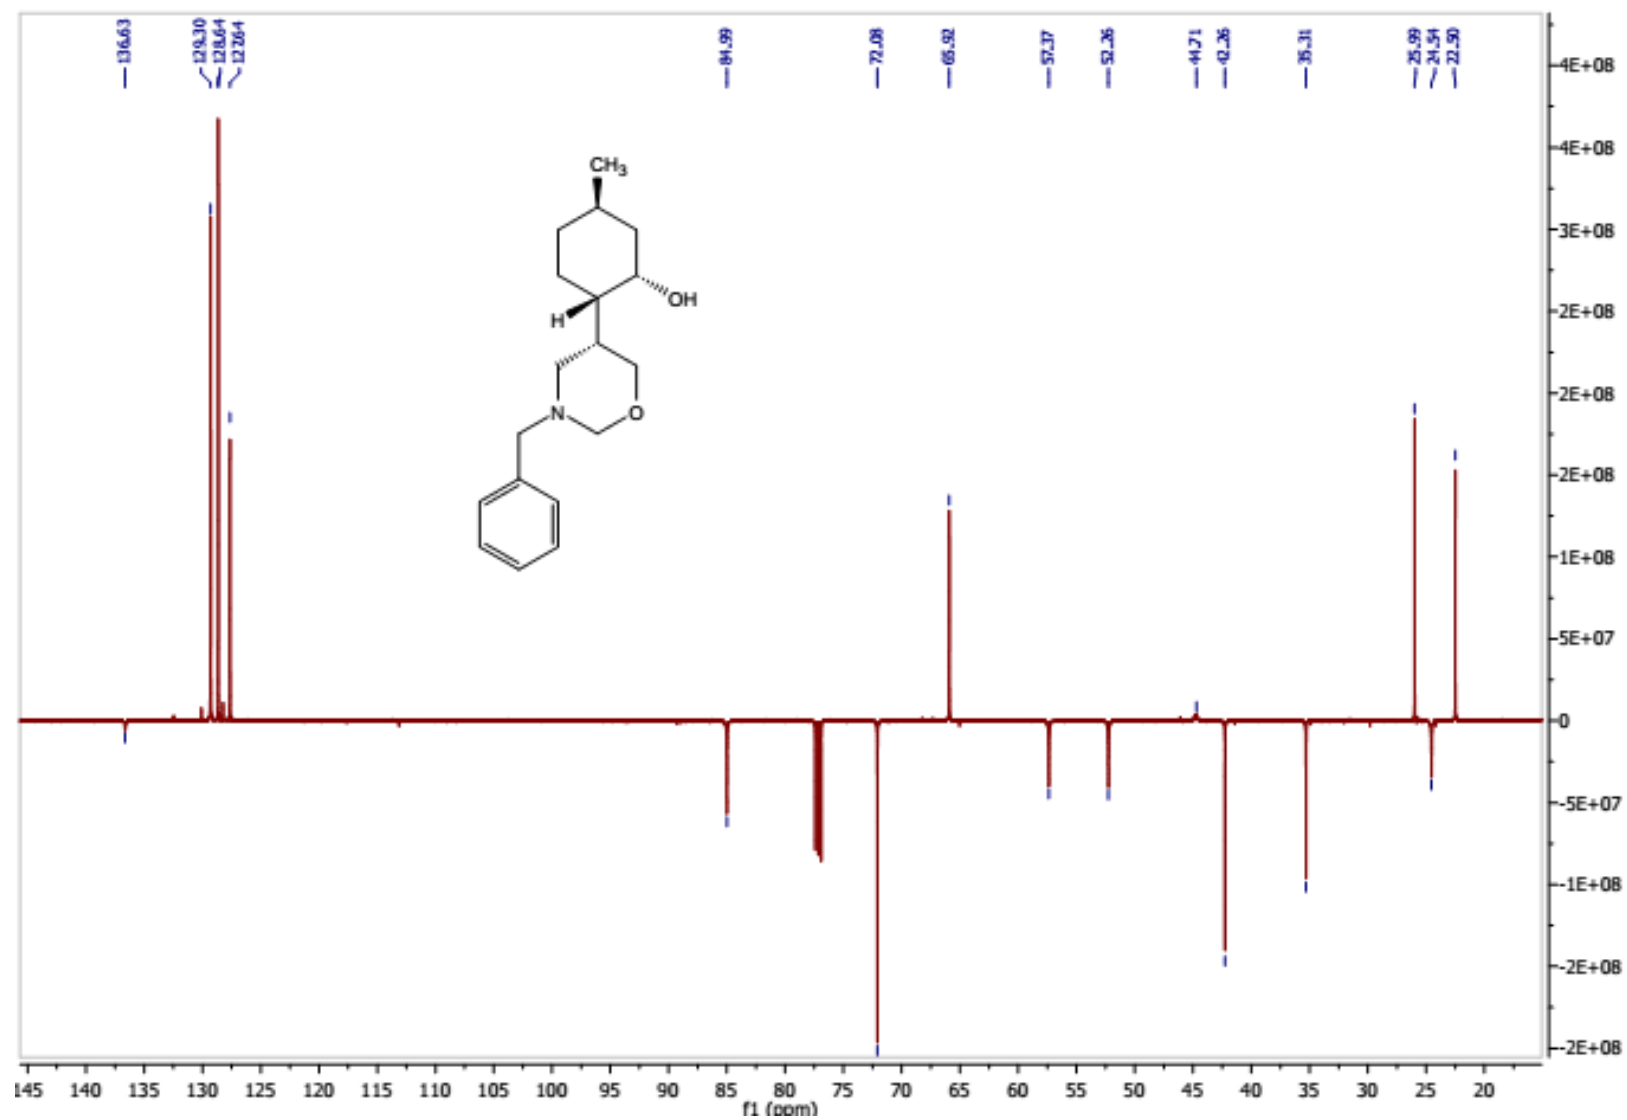



HSQC of compound14

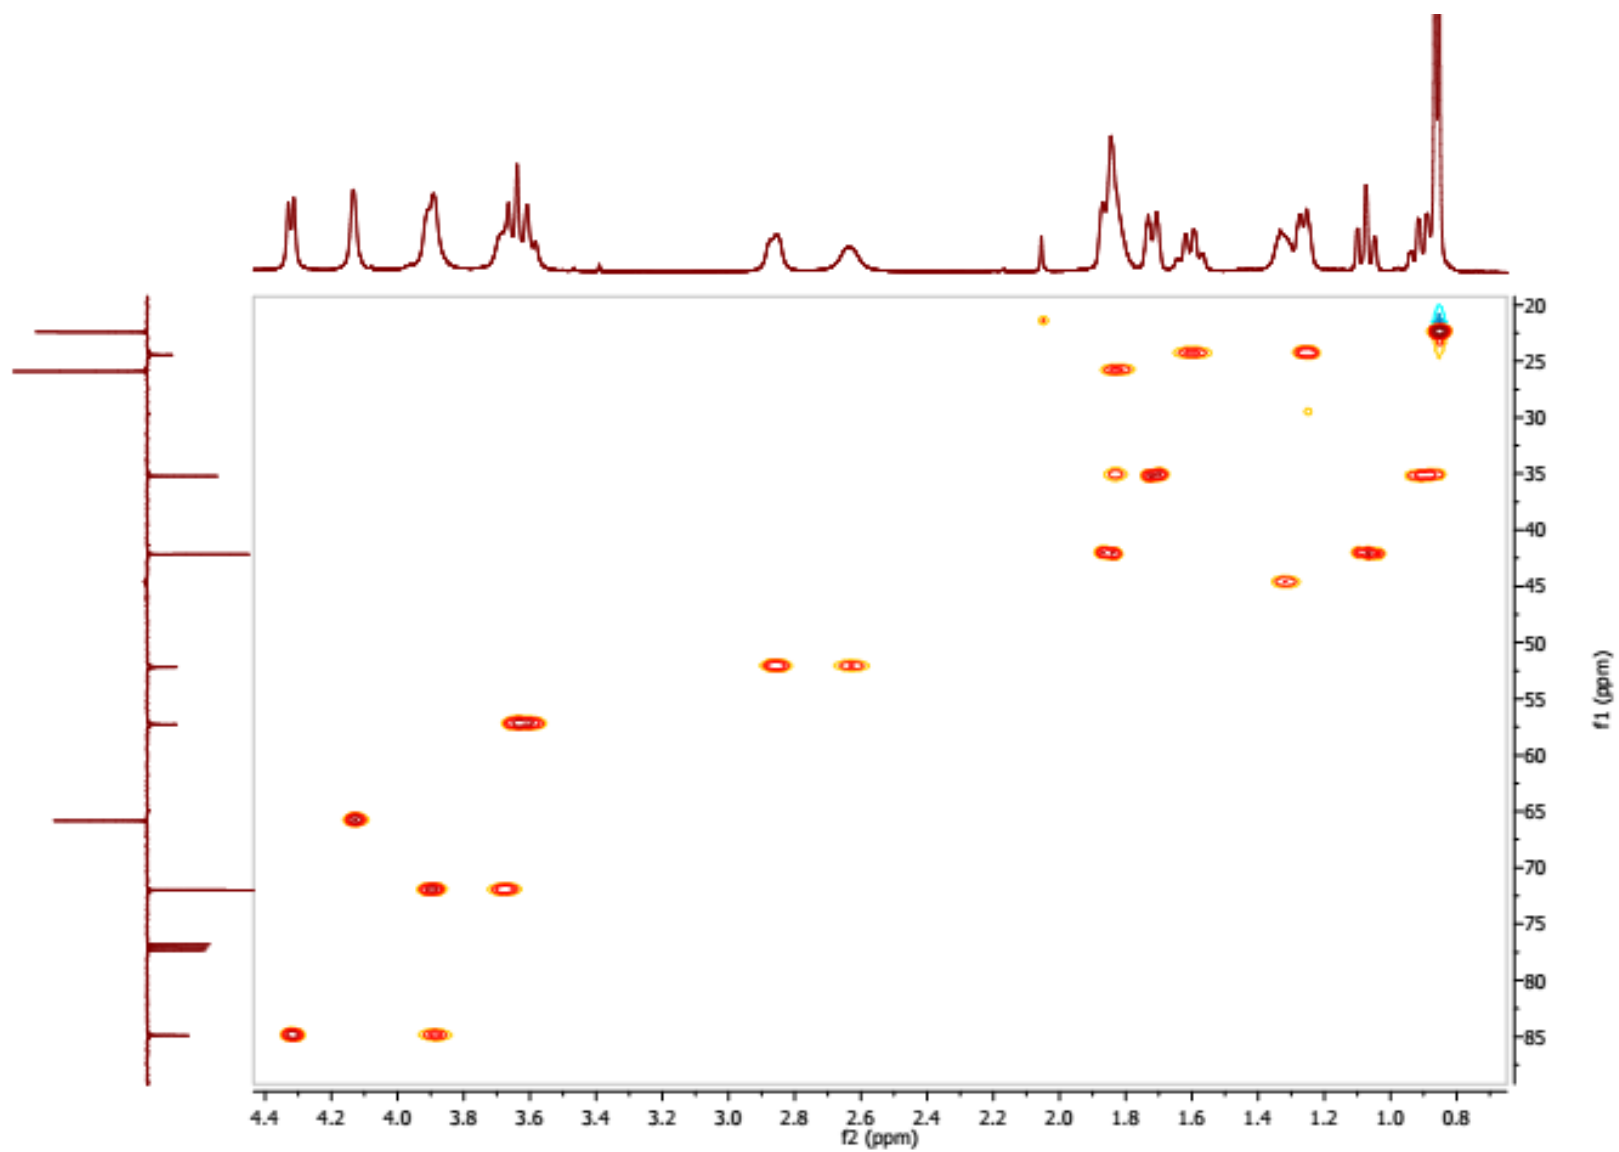

HMBC of compound 14

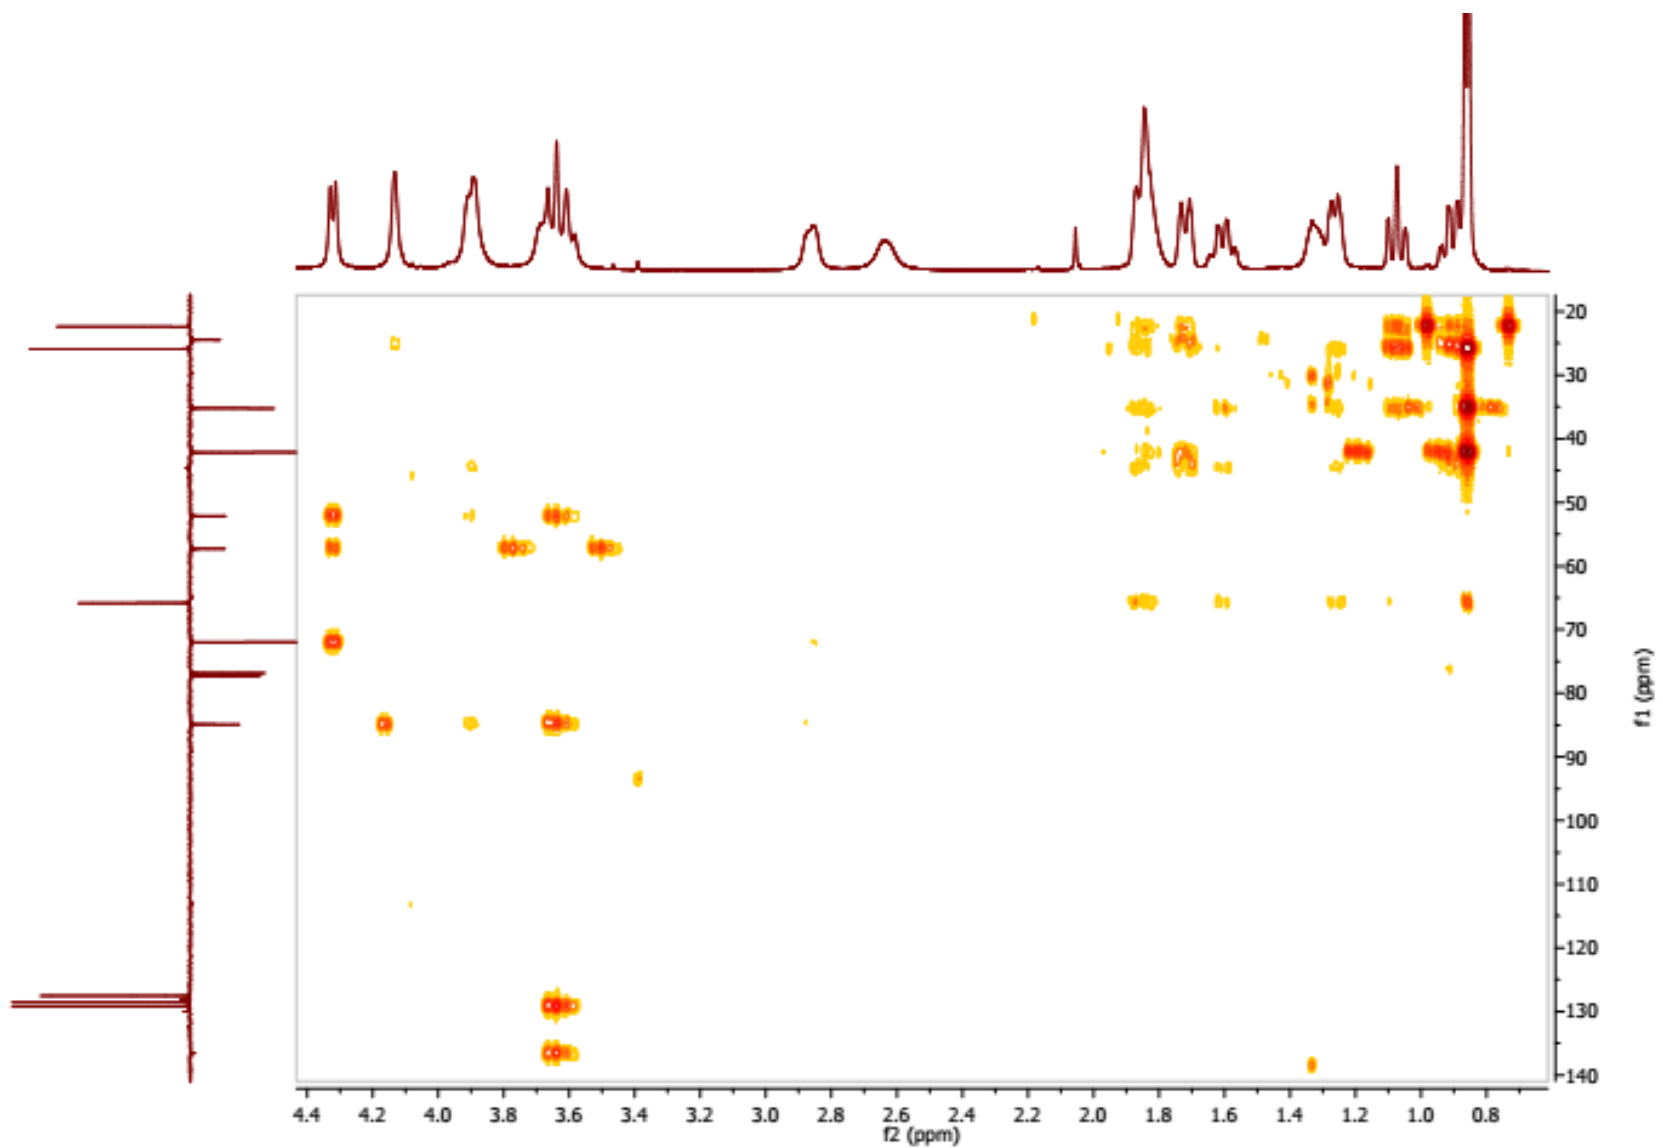

$^1\text{H-NMR}$  of compound **15**

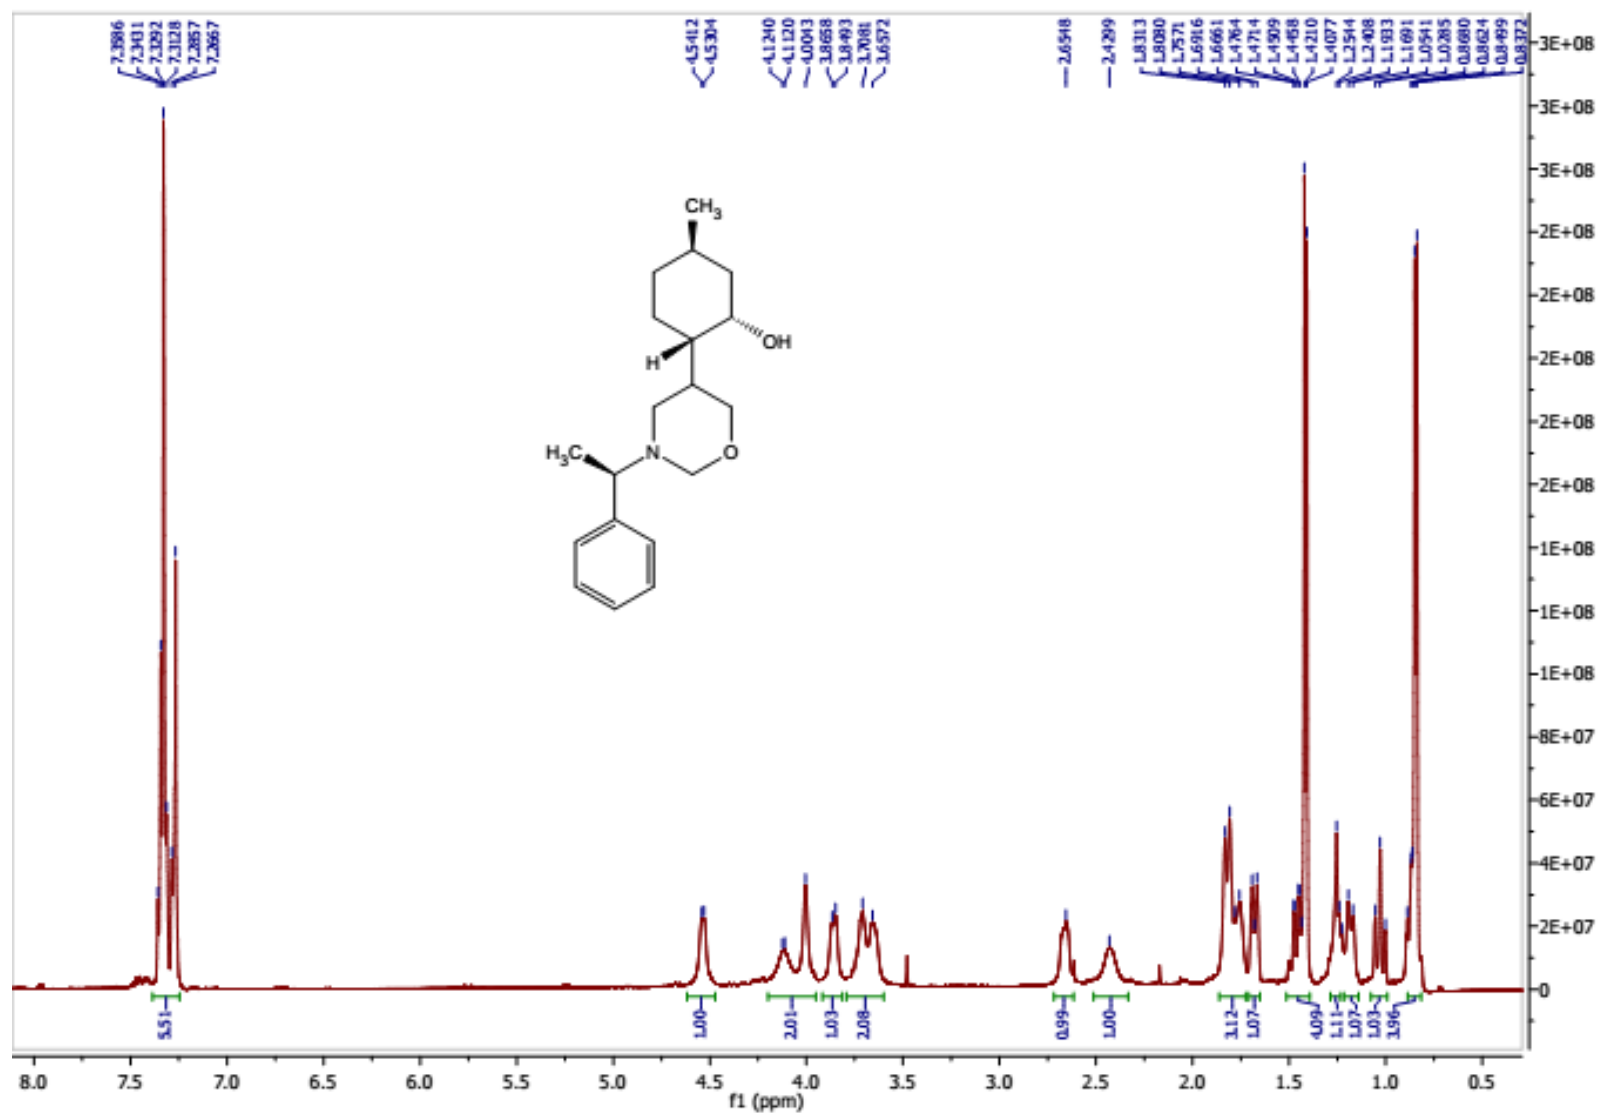

$^{13}\text{C}$ -NMR of compound **15**

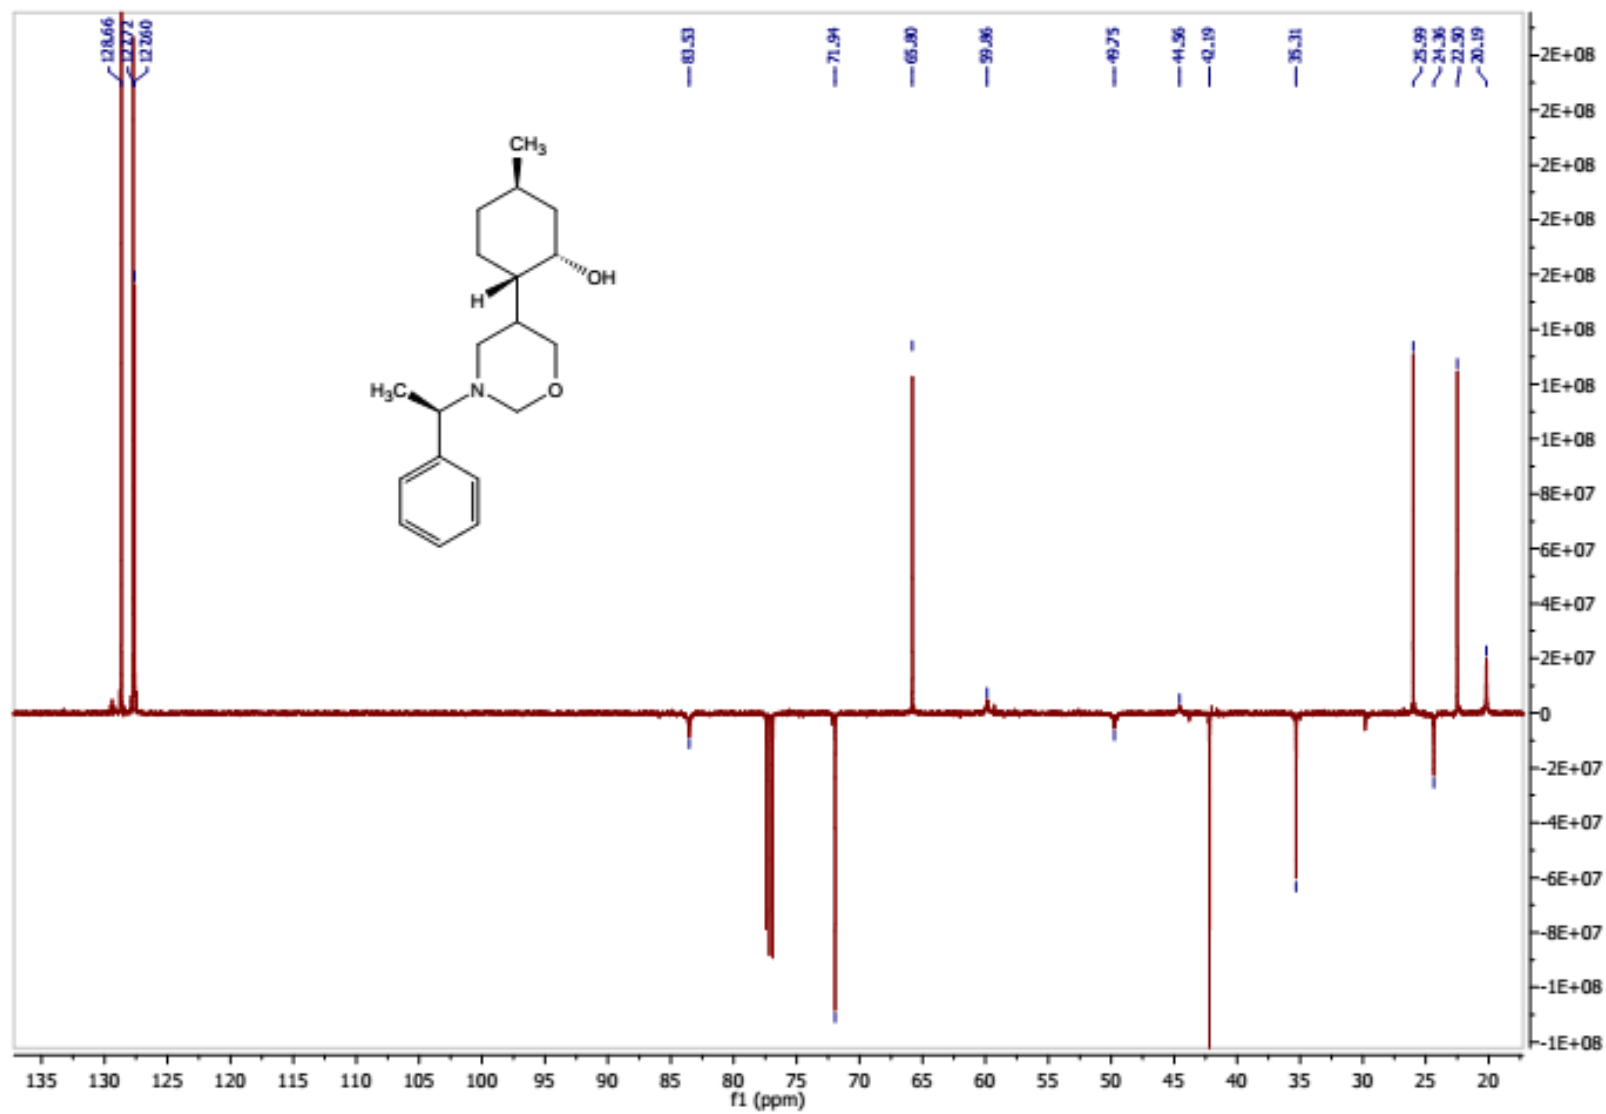

HSQC of compound **15**

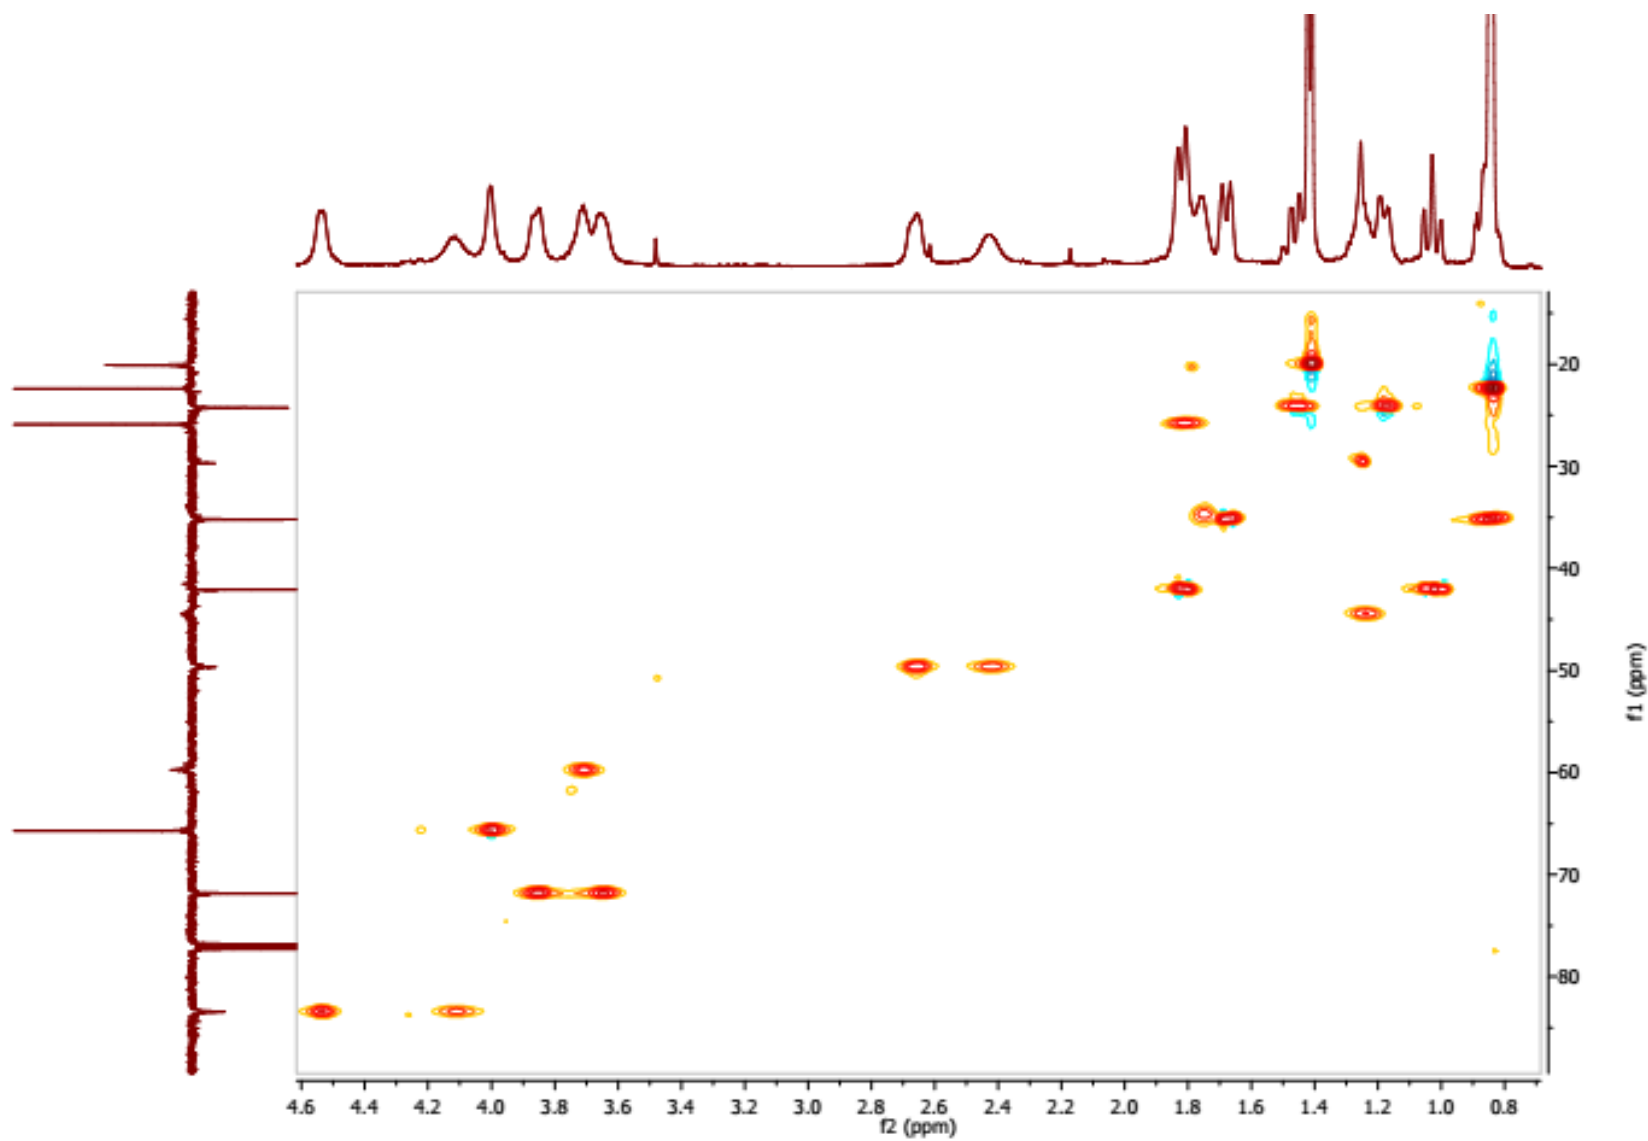

HMBC of compound 15

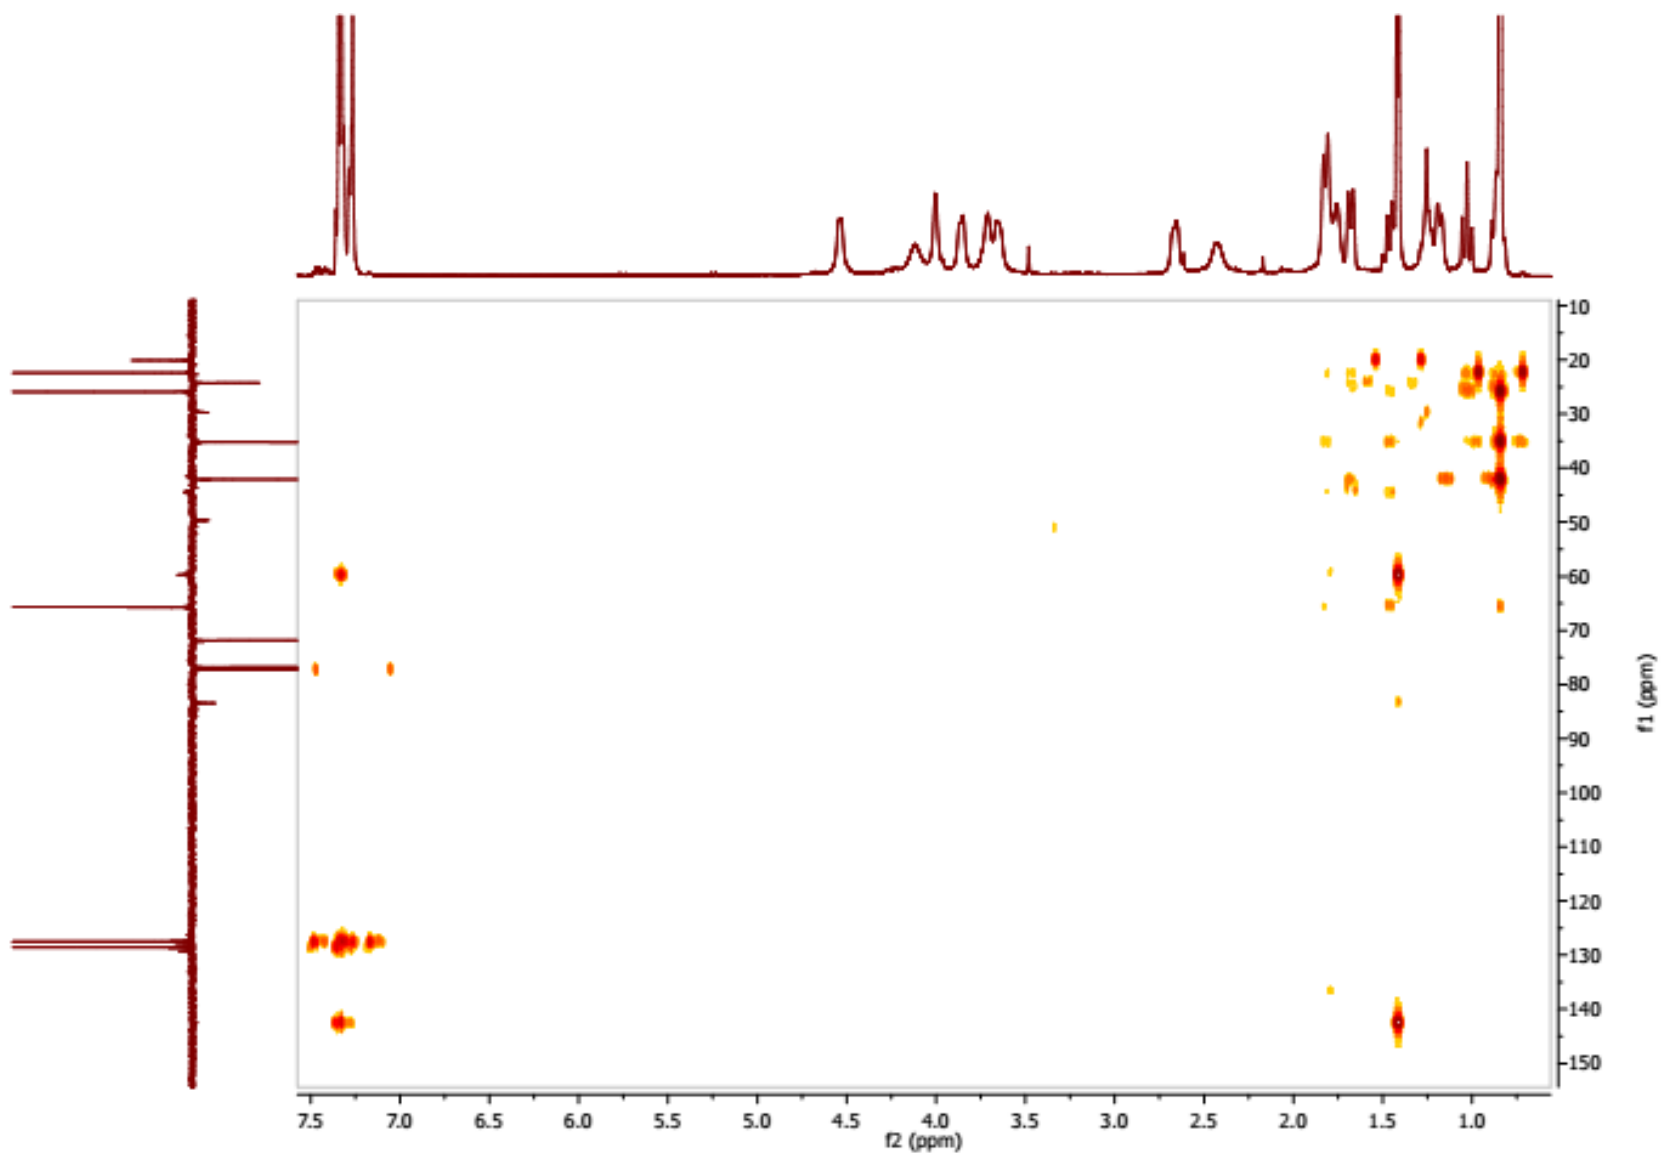

$^1\text{H-NMR}$  of compound **16**

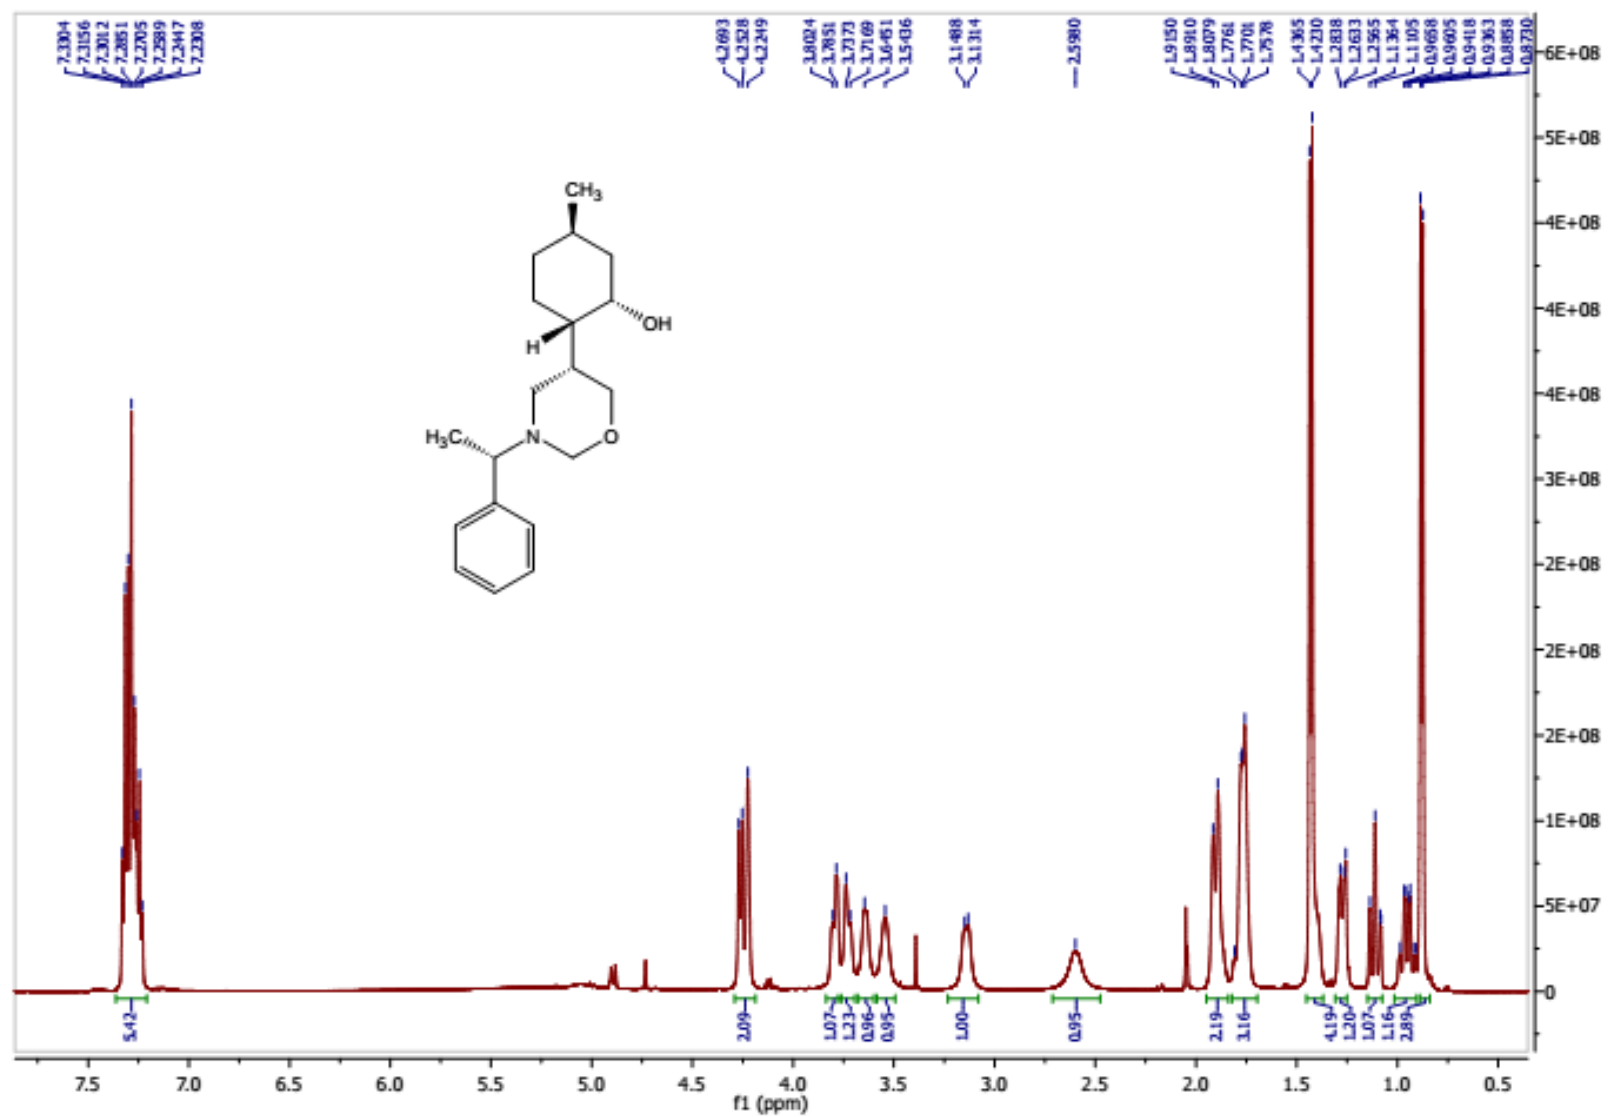

$^{13}\text{C}$ -NMR of compound **16**

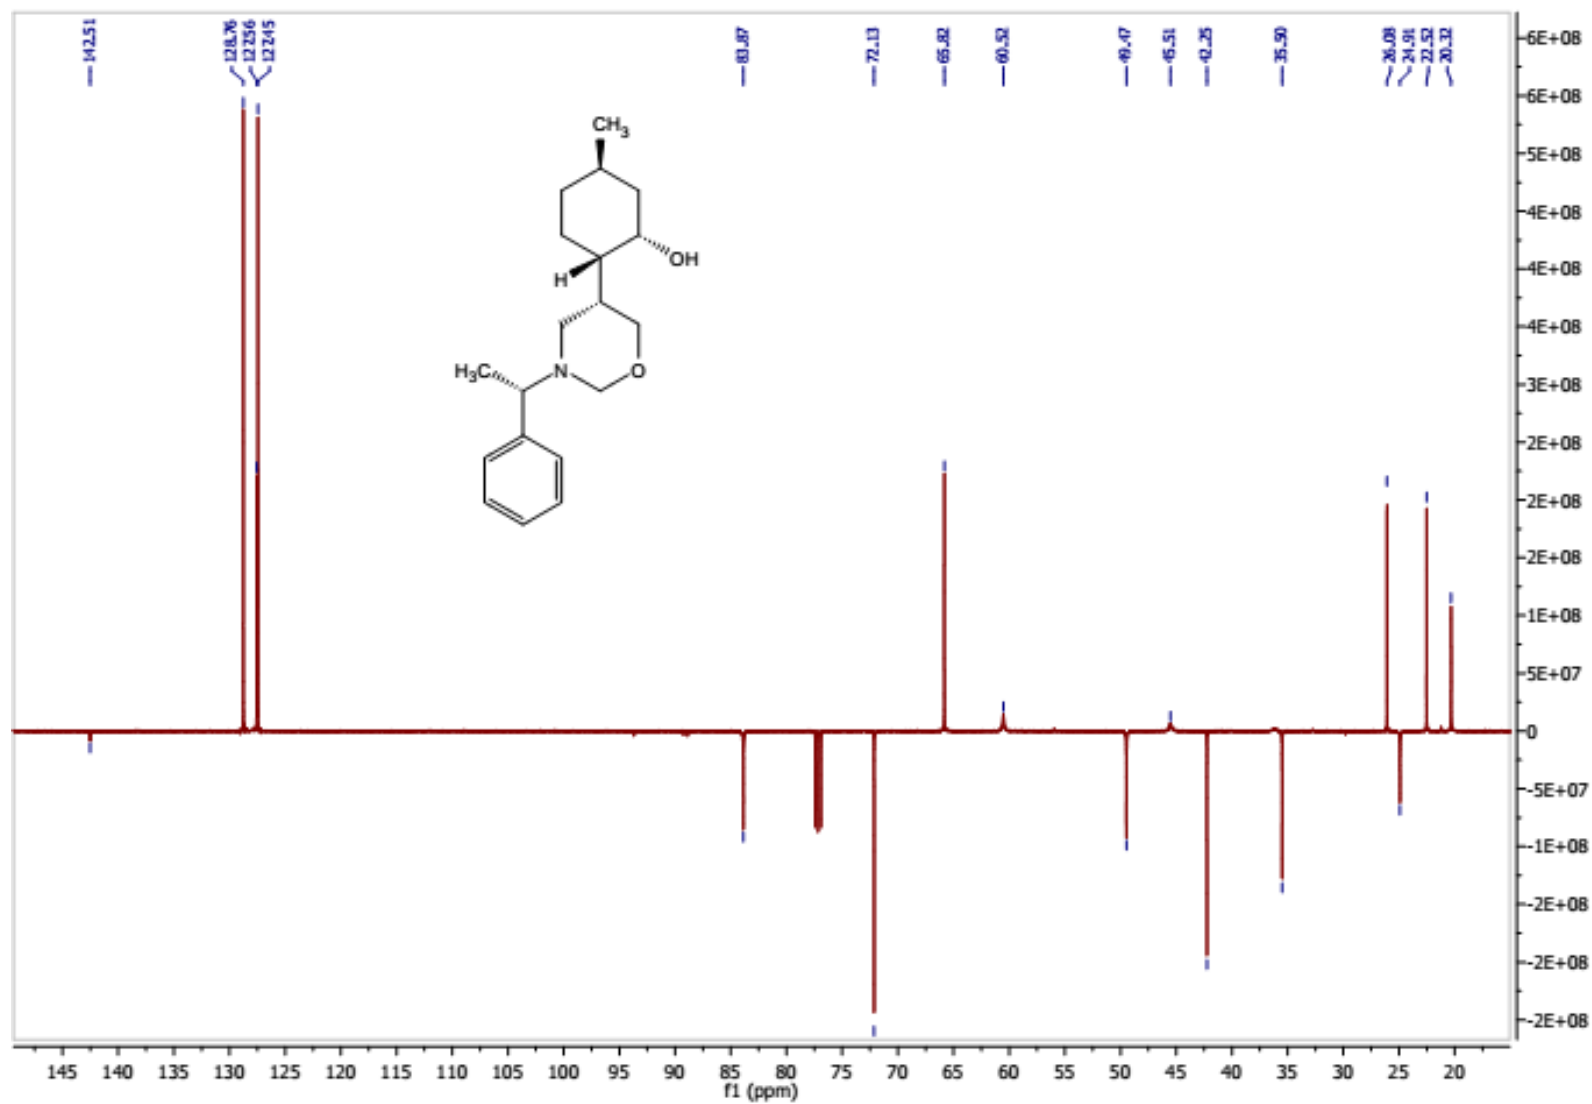



HSQC of compound **16**

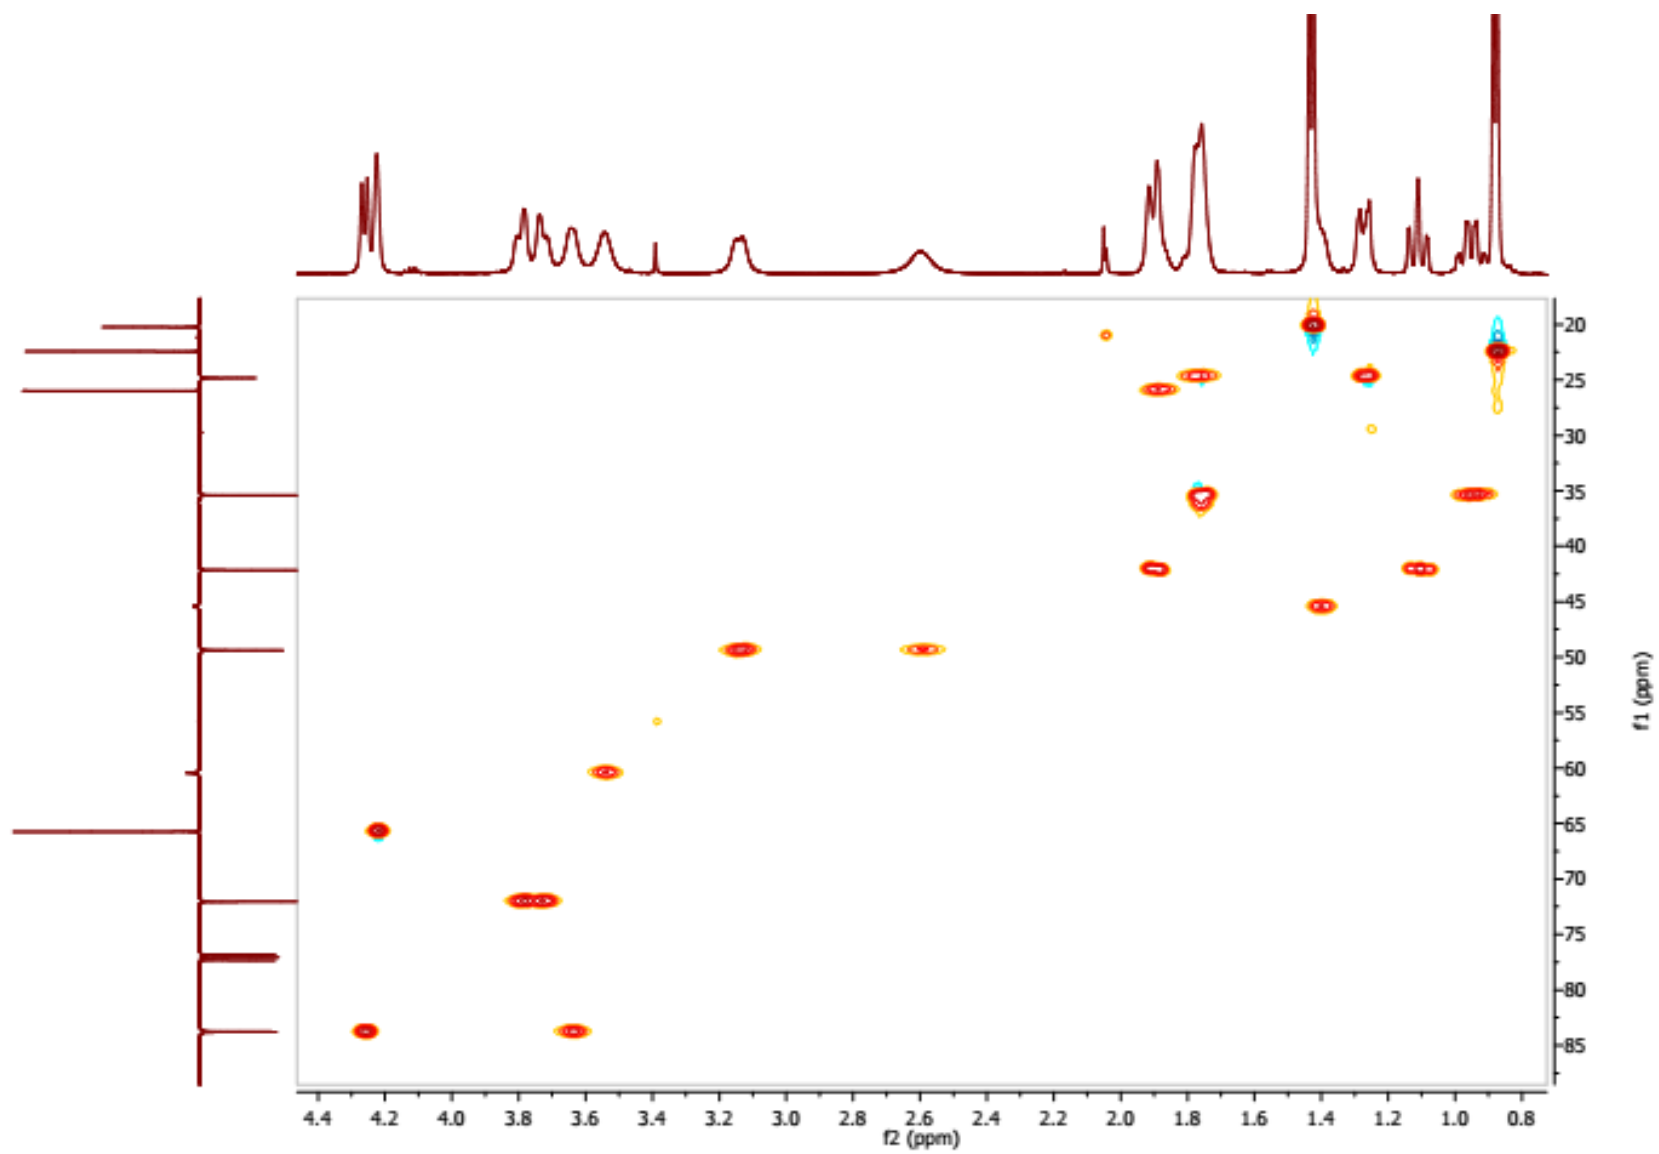

$^1\text{H-NMR}$  of compound **17**

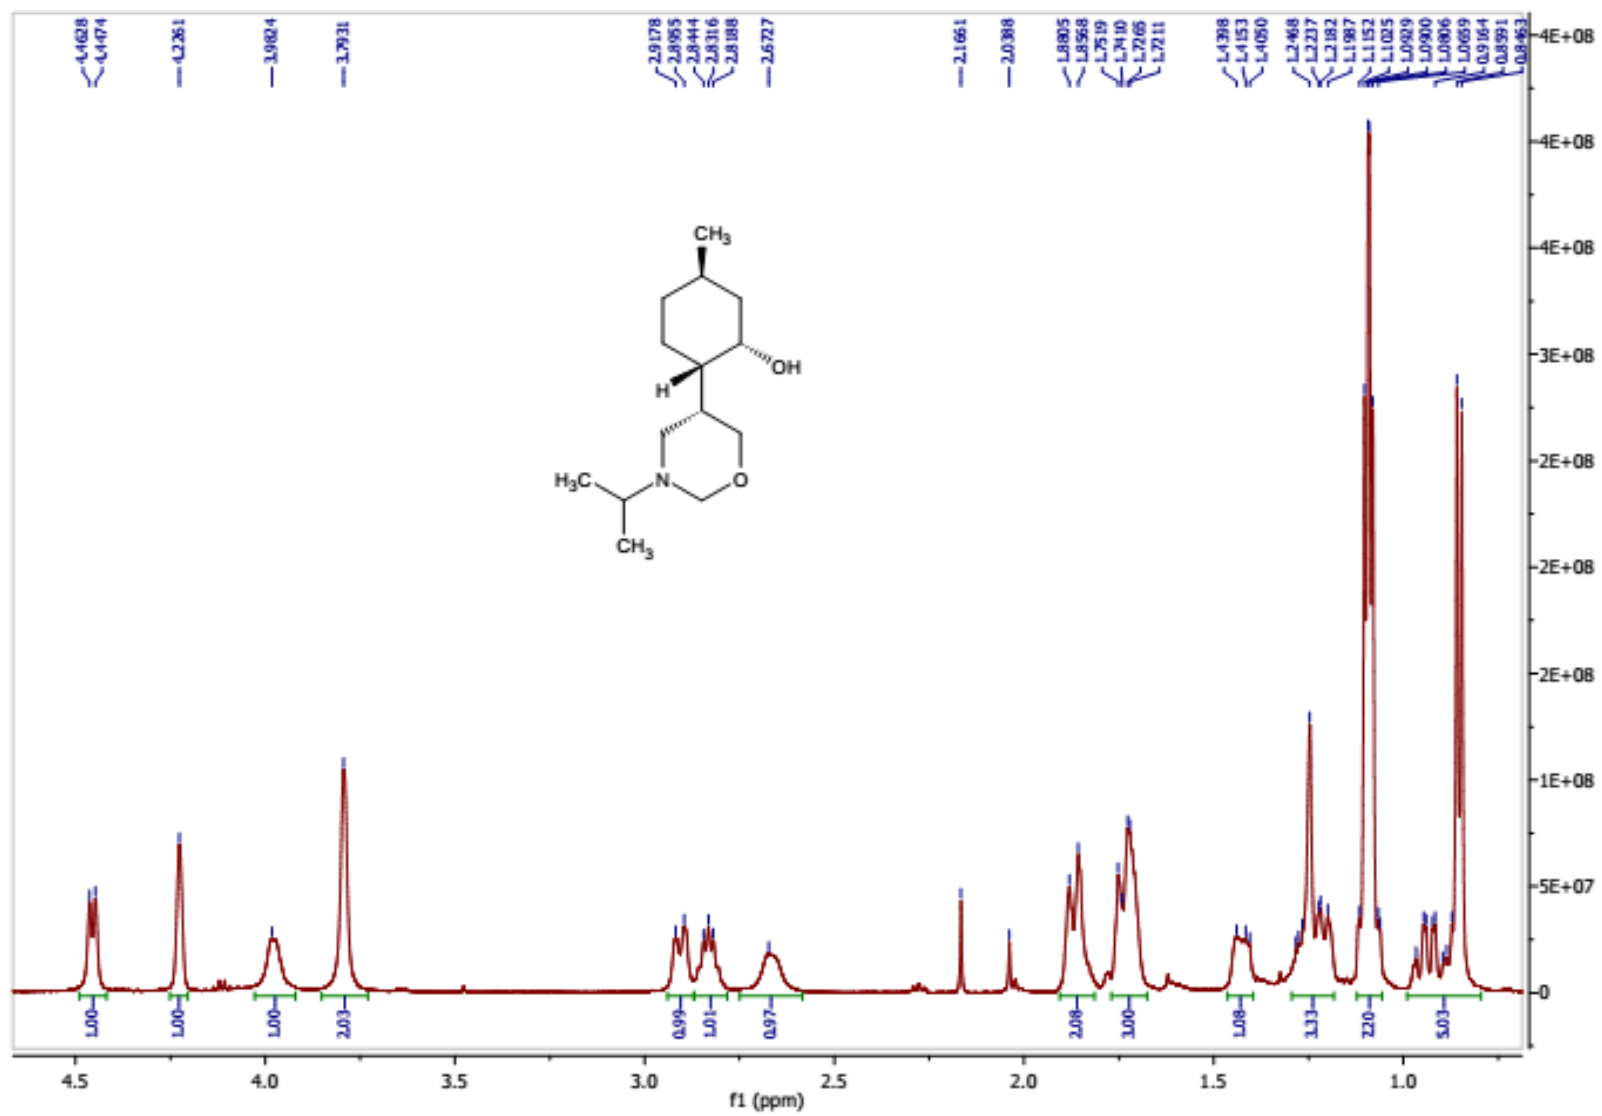

$^{13}\text{C}$ -NMR of compound **17**

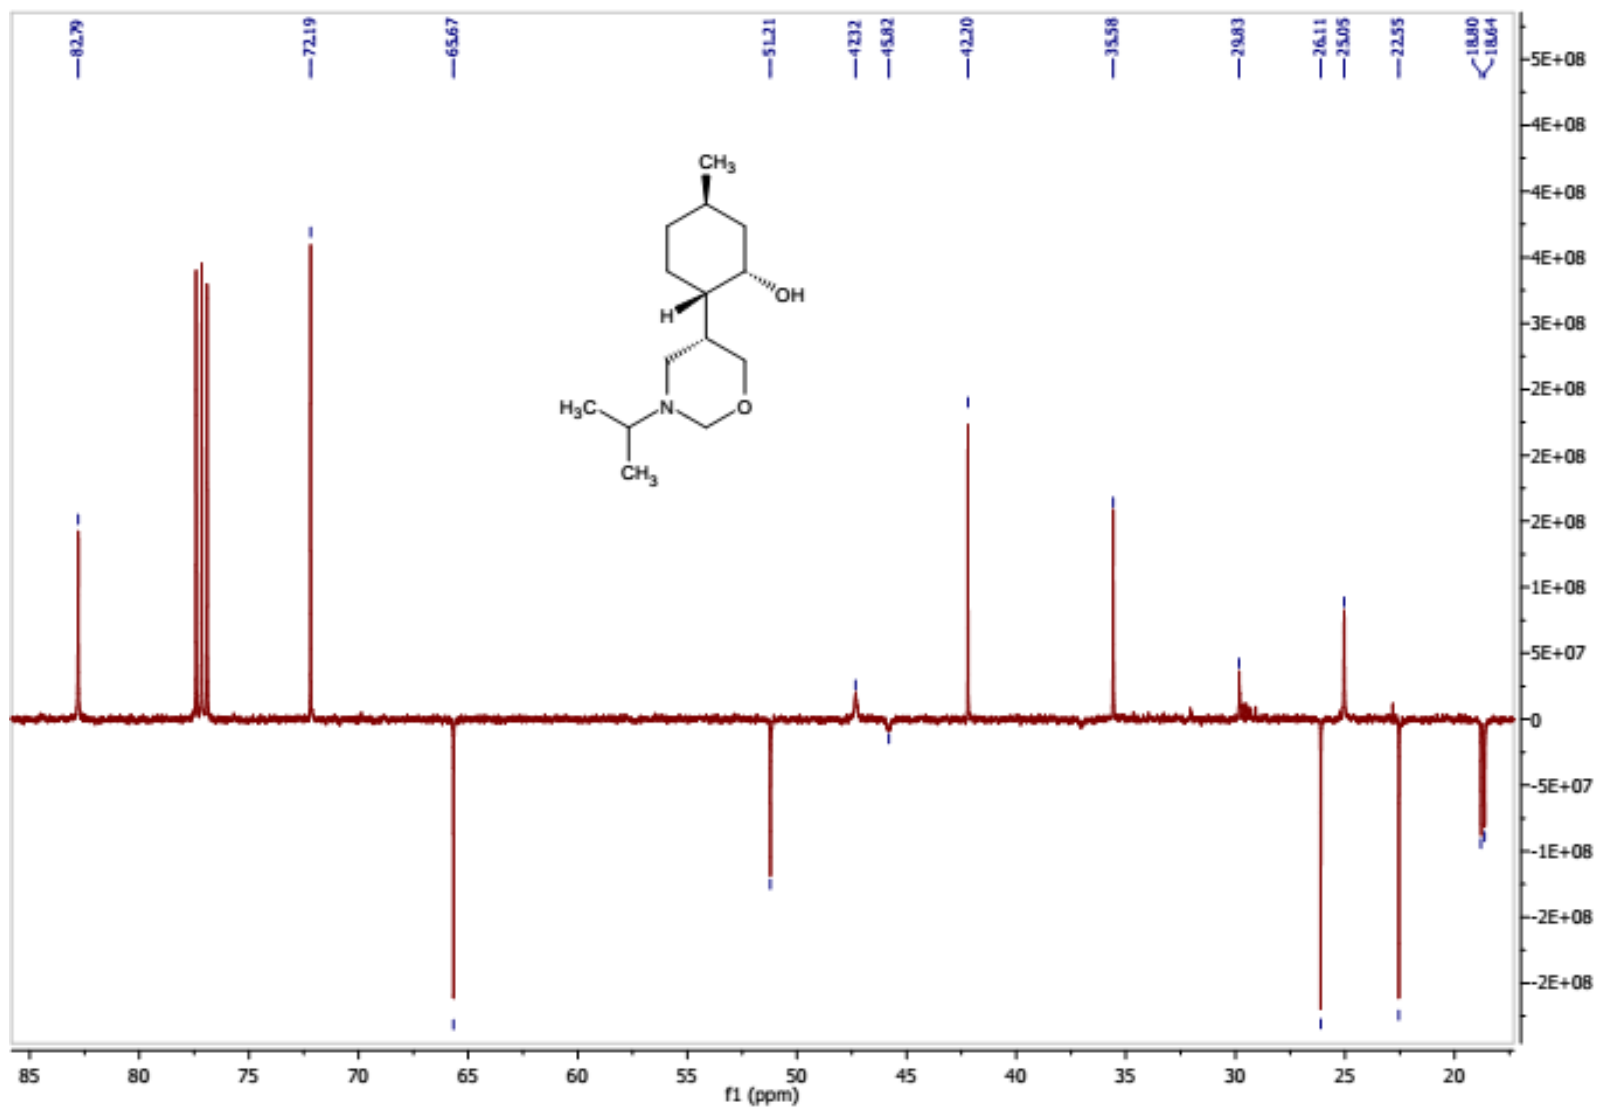

HSQC of compound **17**

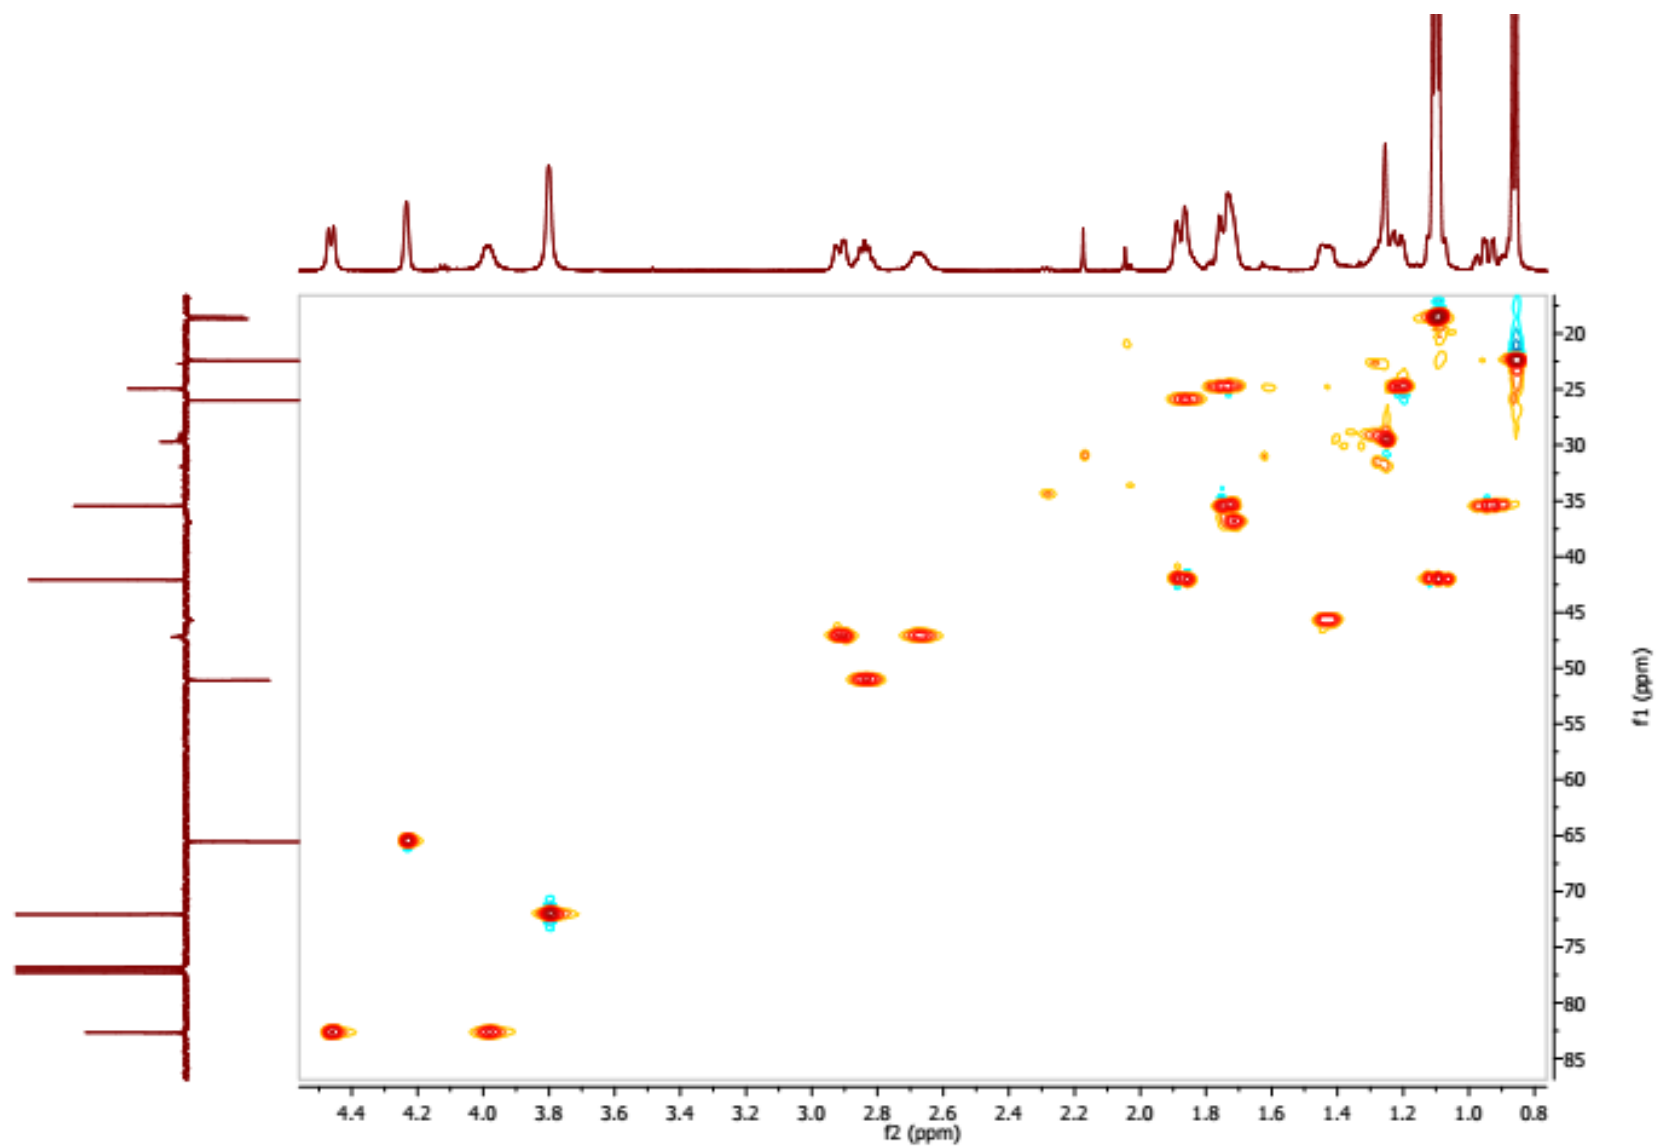

HMBC of compound 17

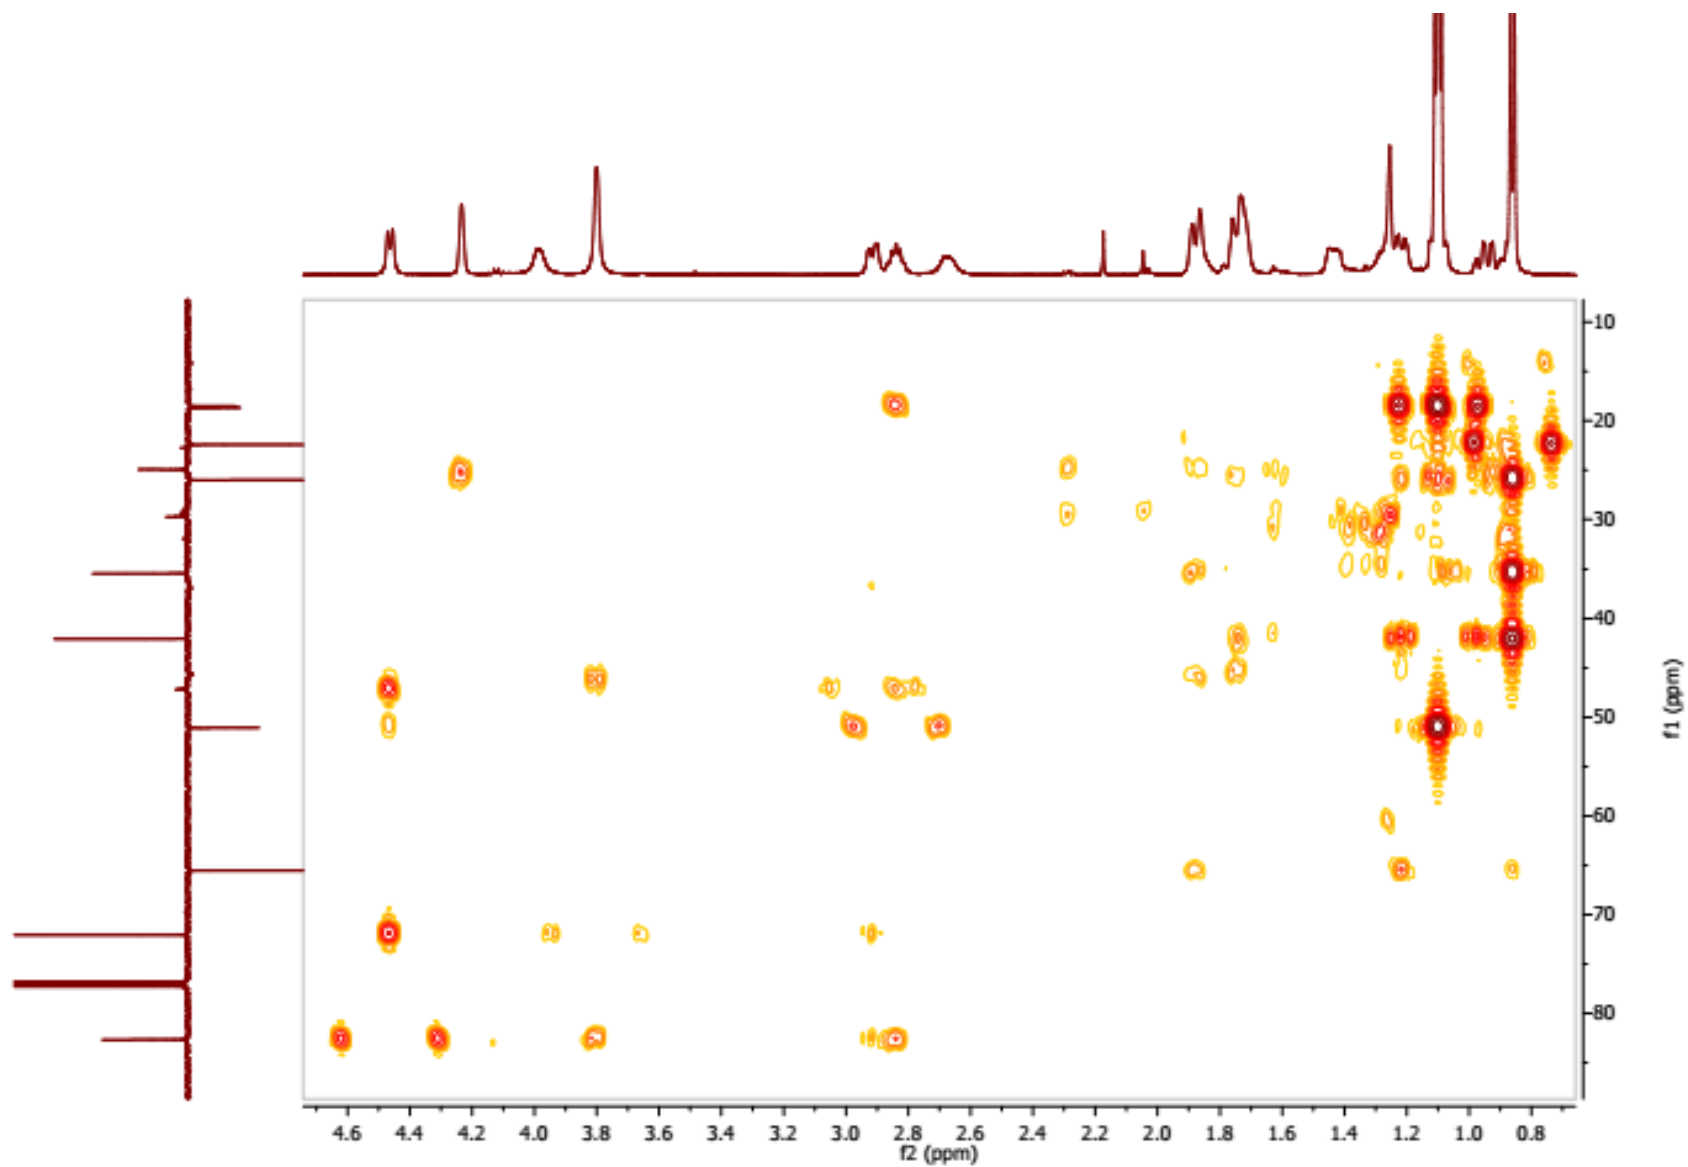

$^1\text{H-NMR}$  of compound **18**

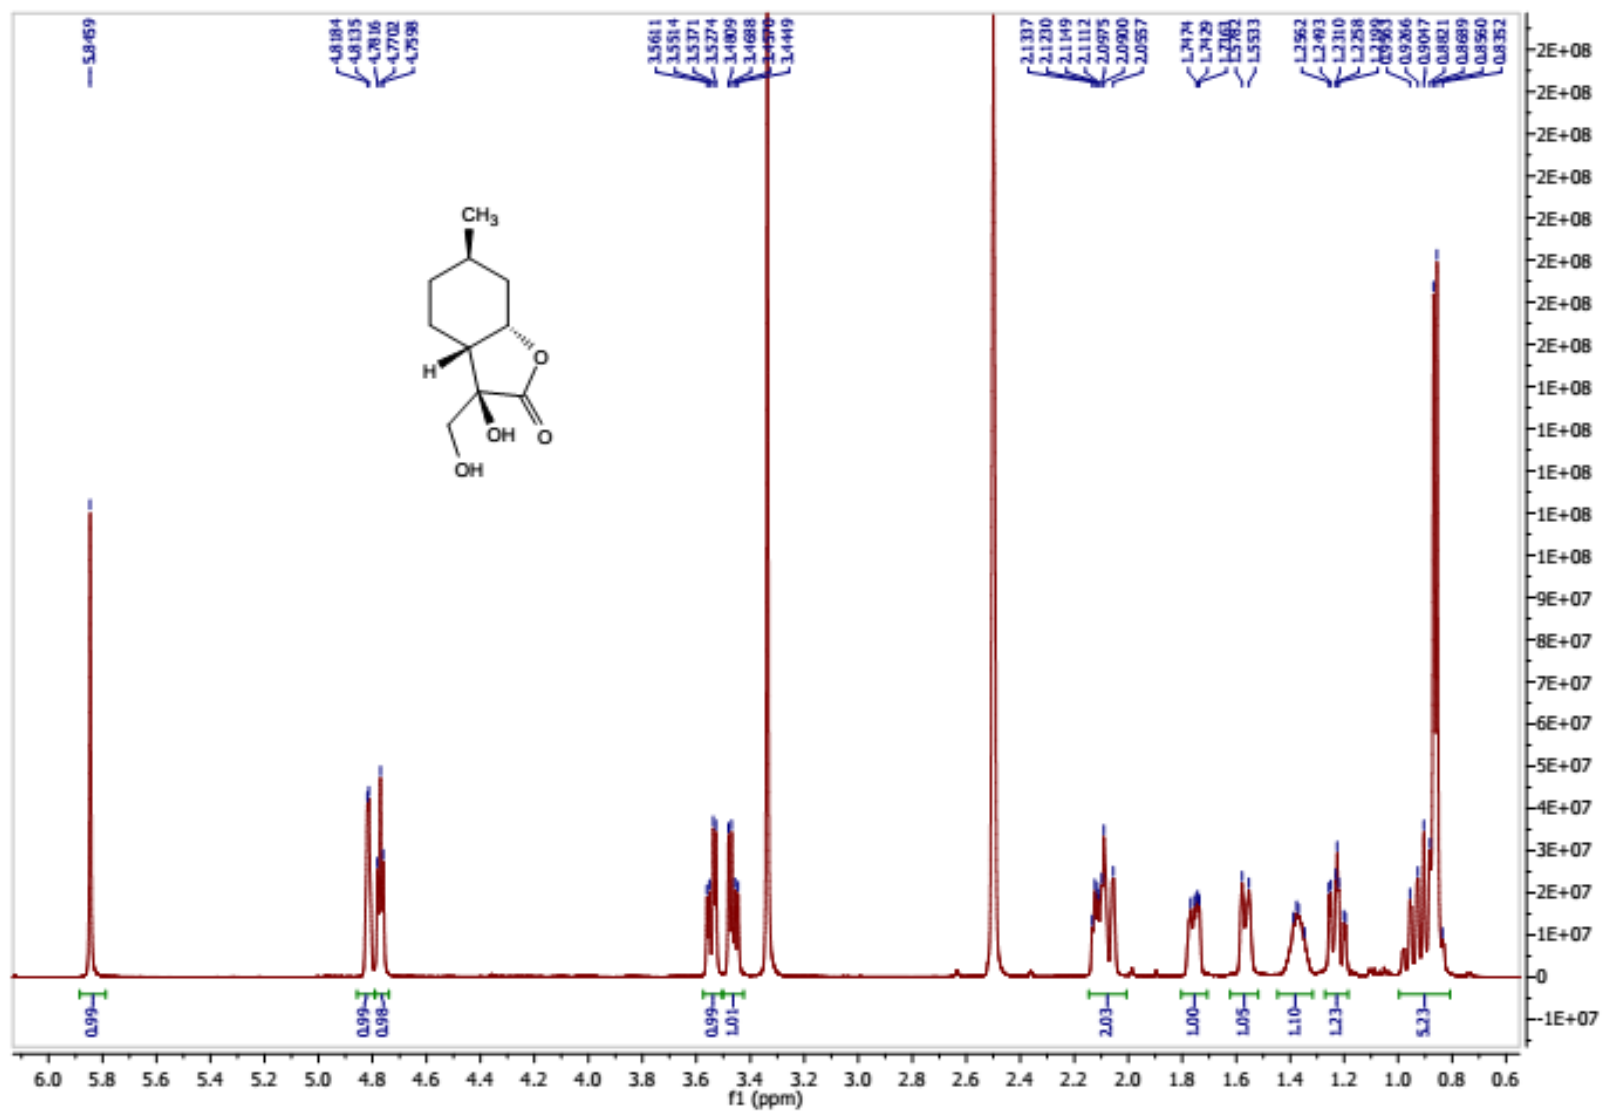

$^{13}\text{C}$ -NMR of compound **18**

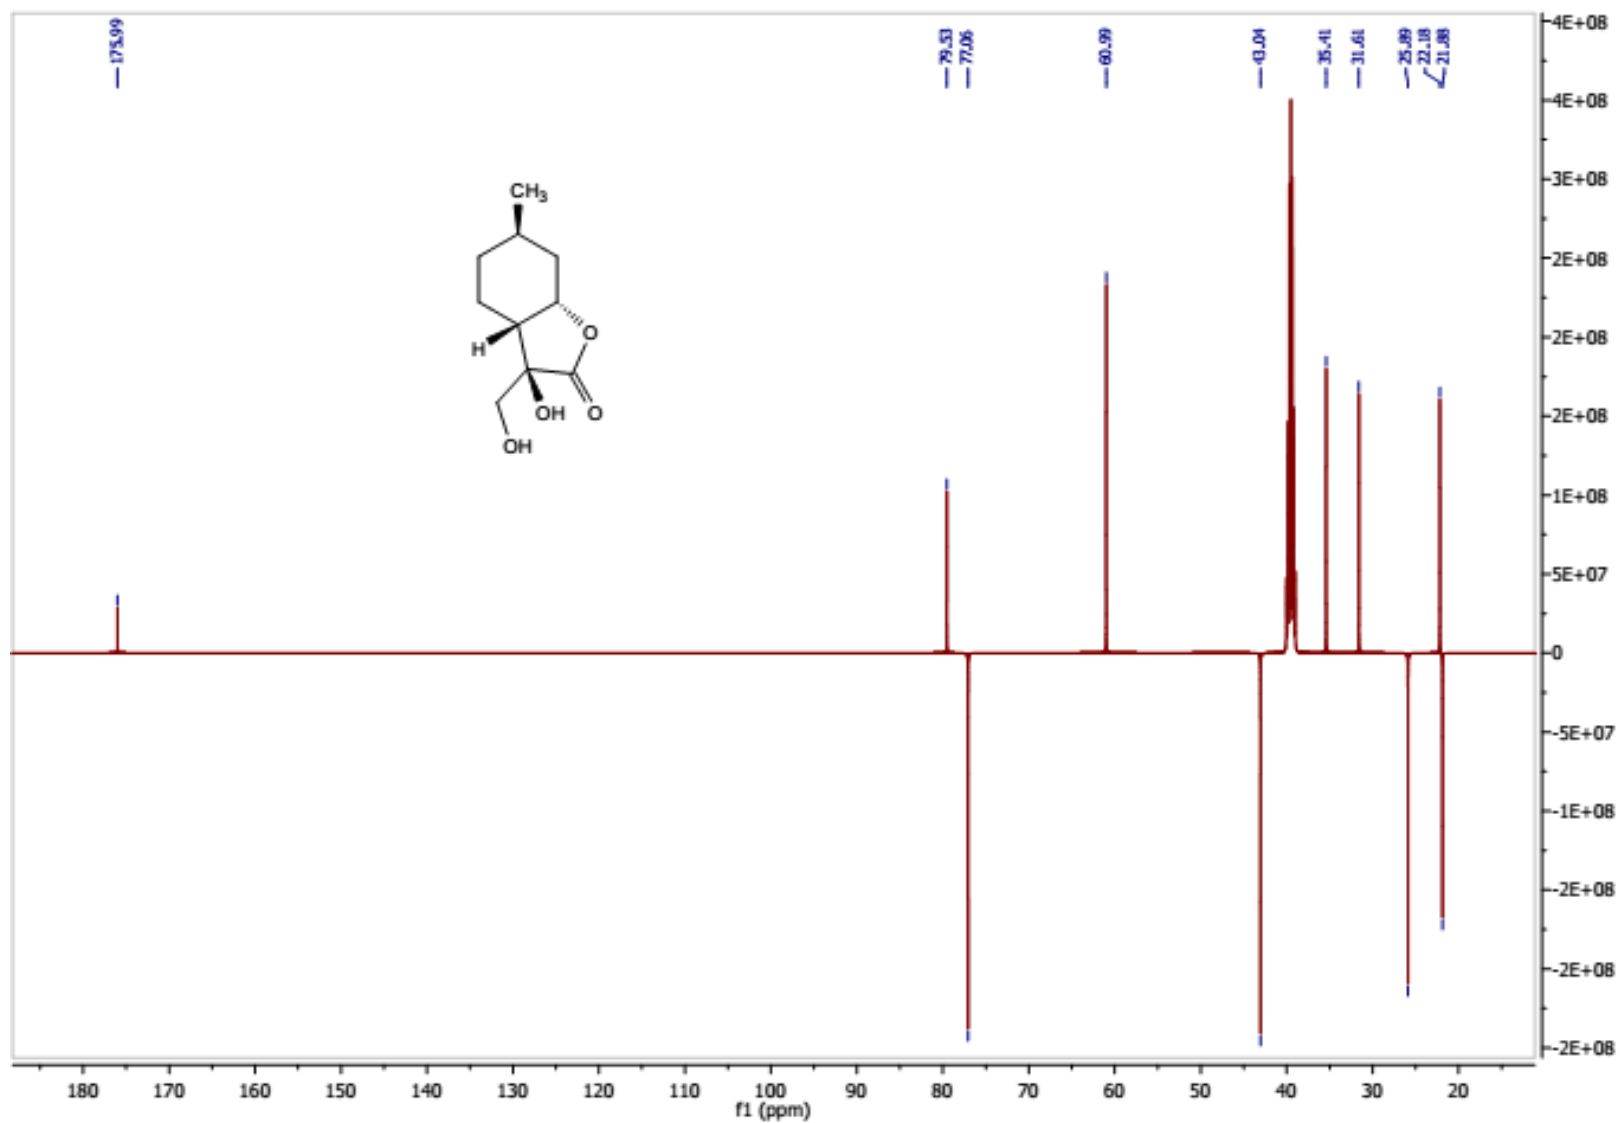

COSY of compound **18**

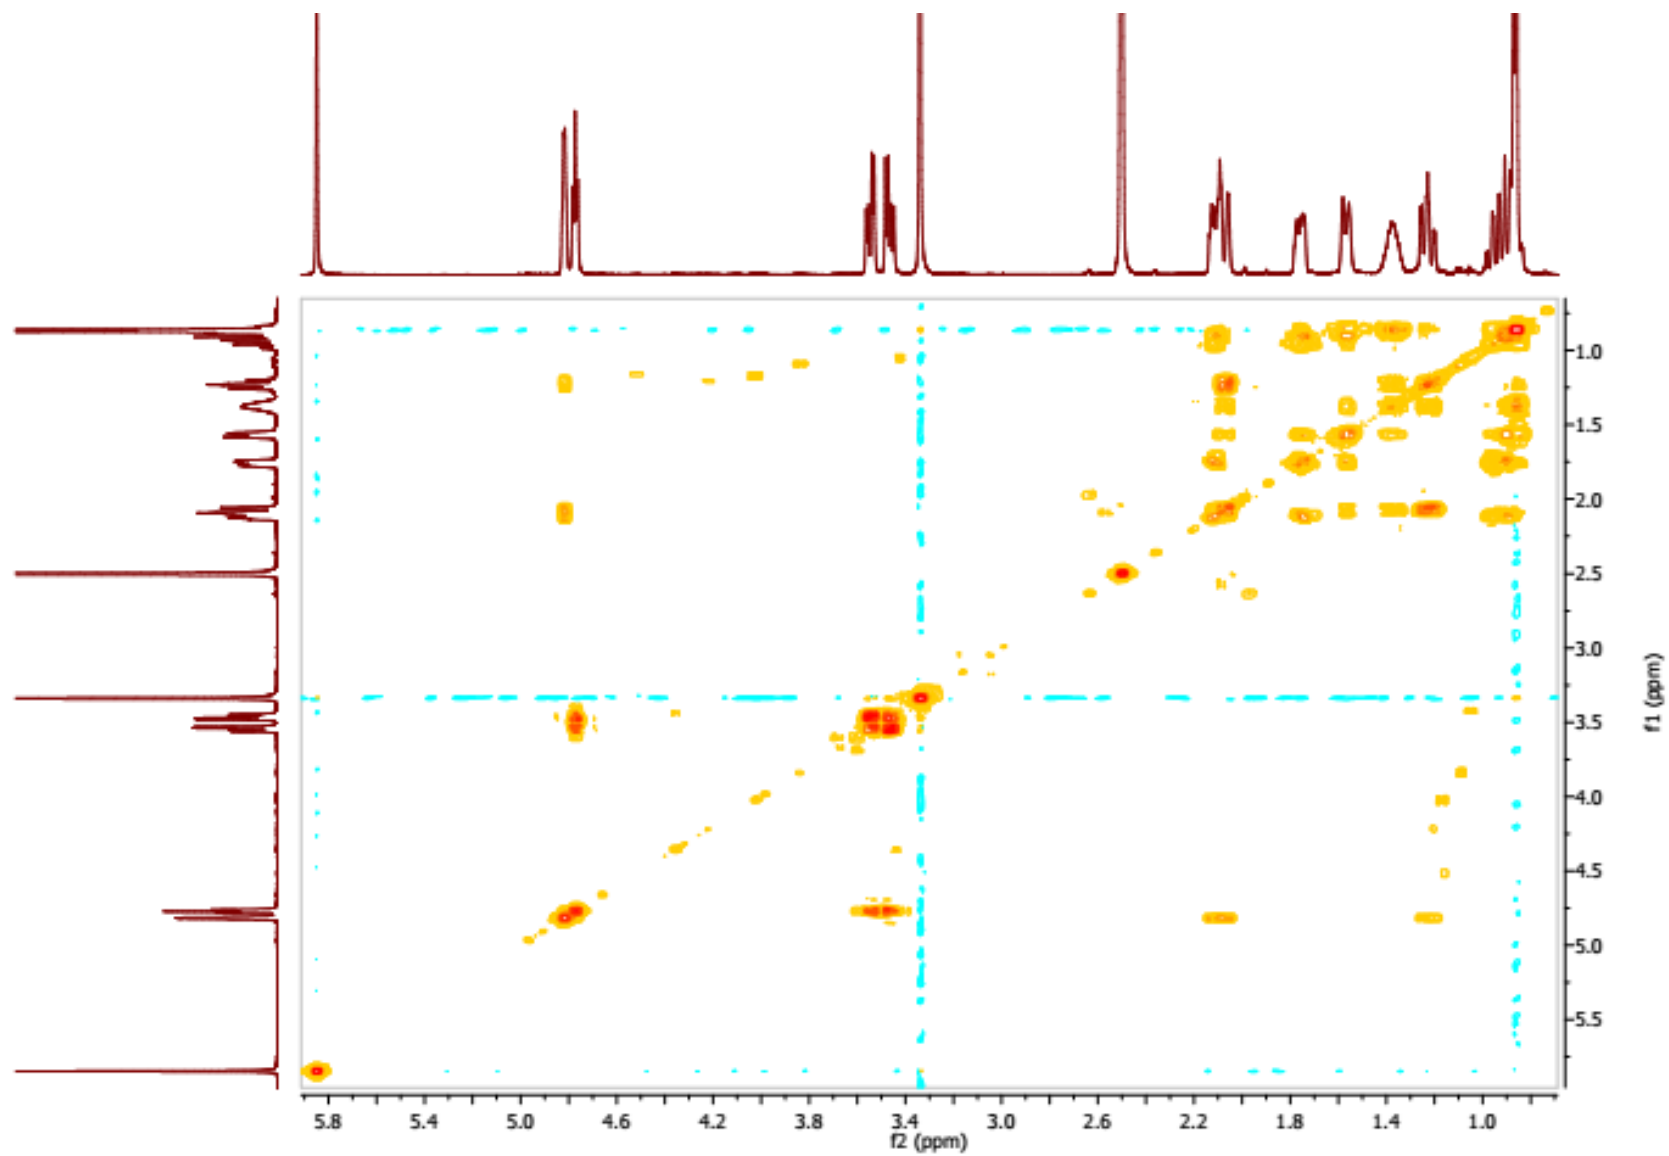



NOESY of compound **18**

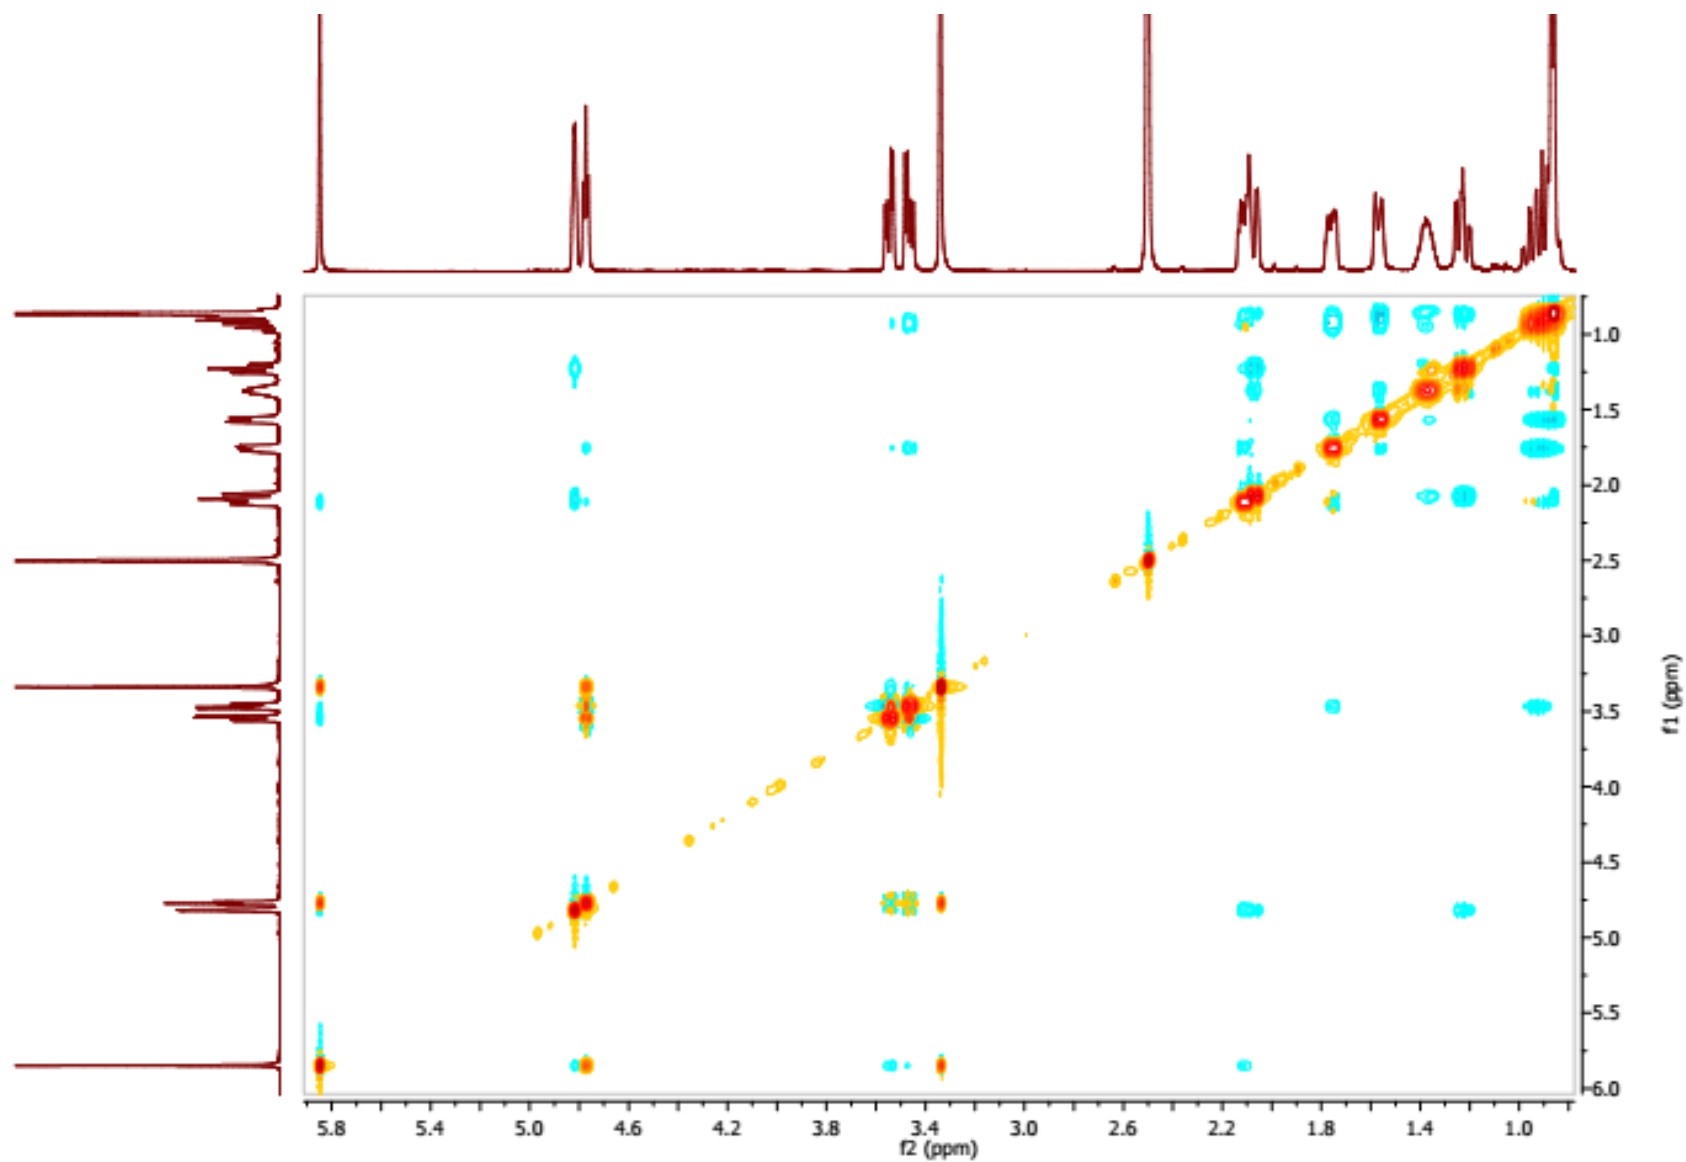

HSQC of compound **18**

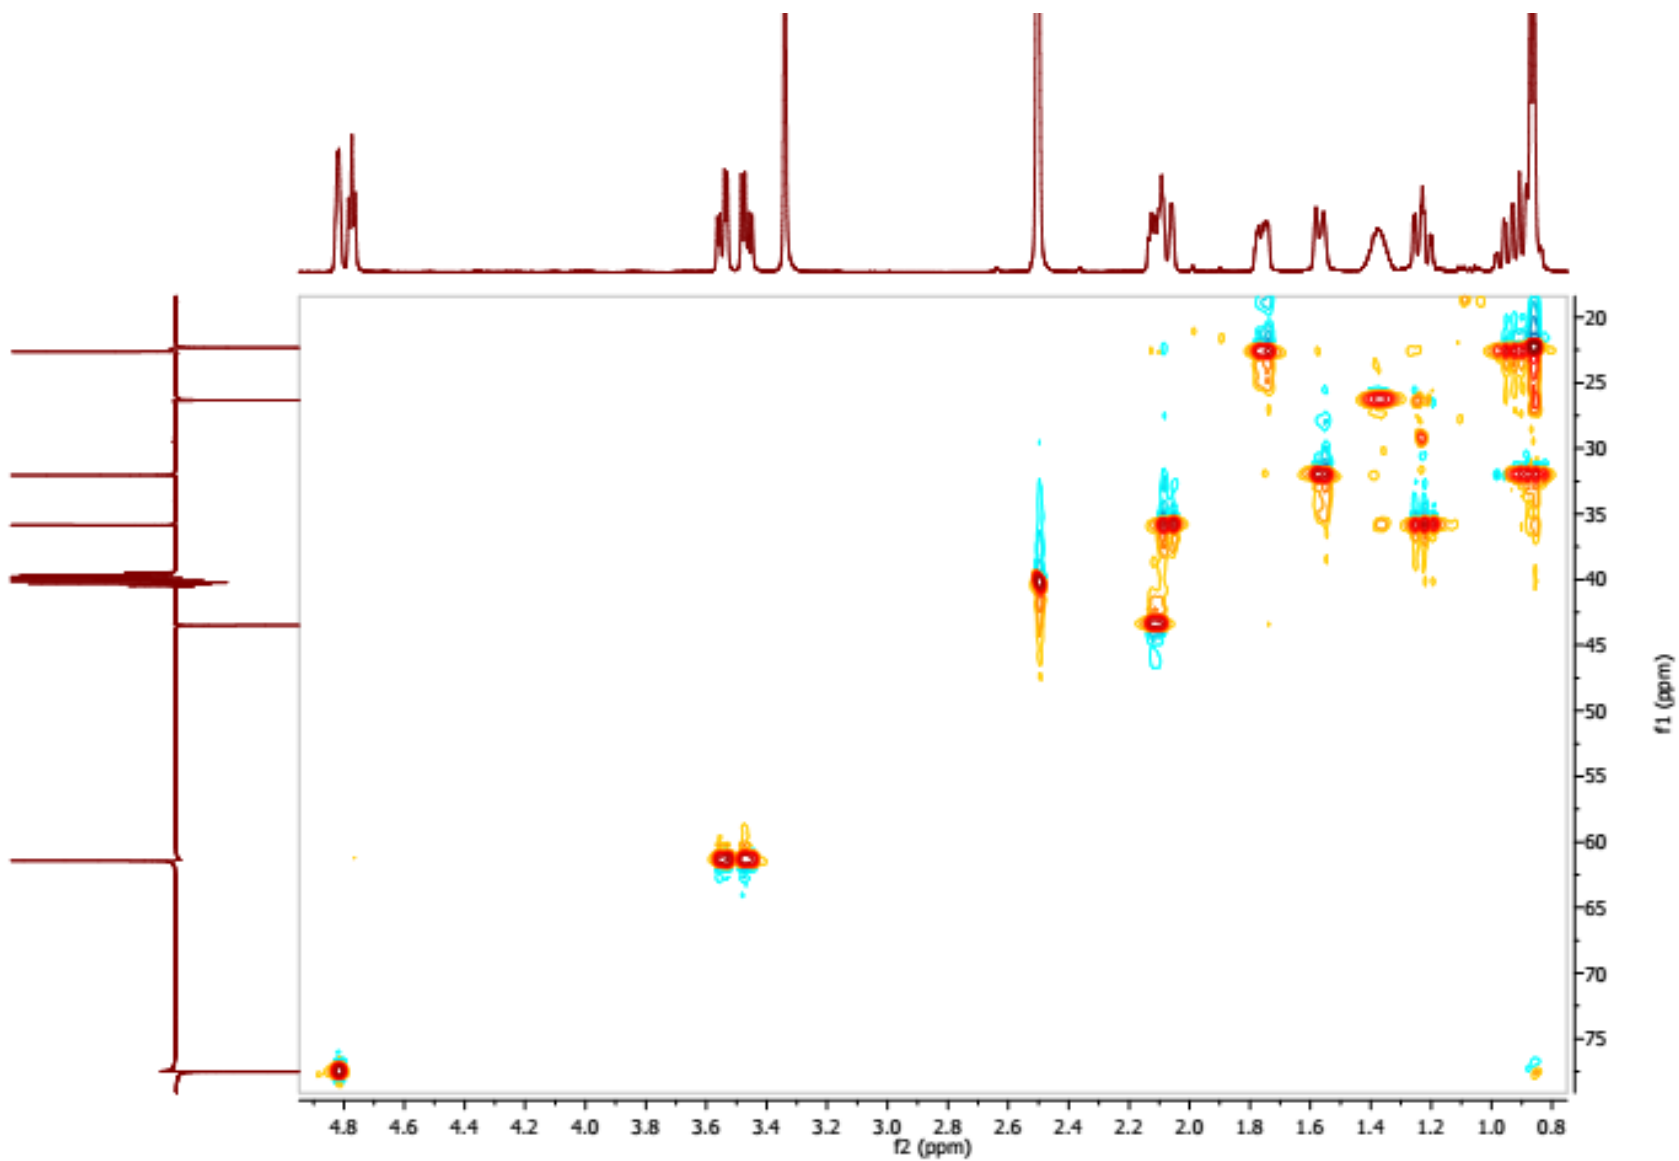

HMBC of compound **18**

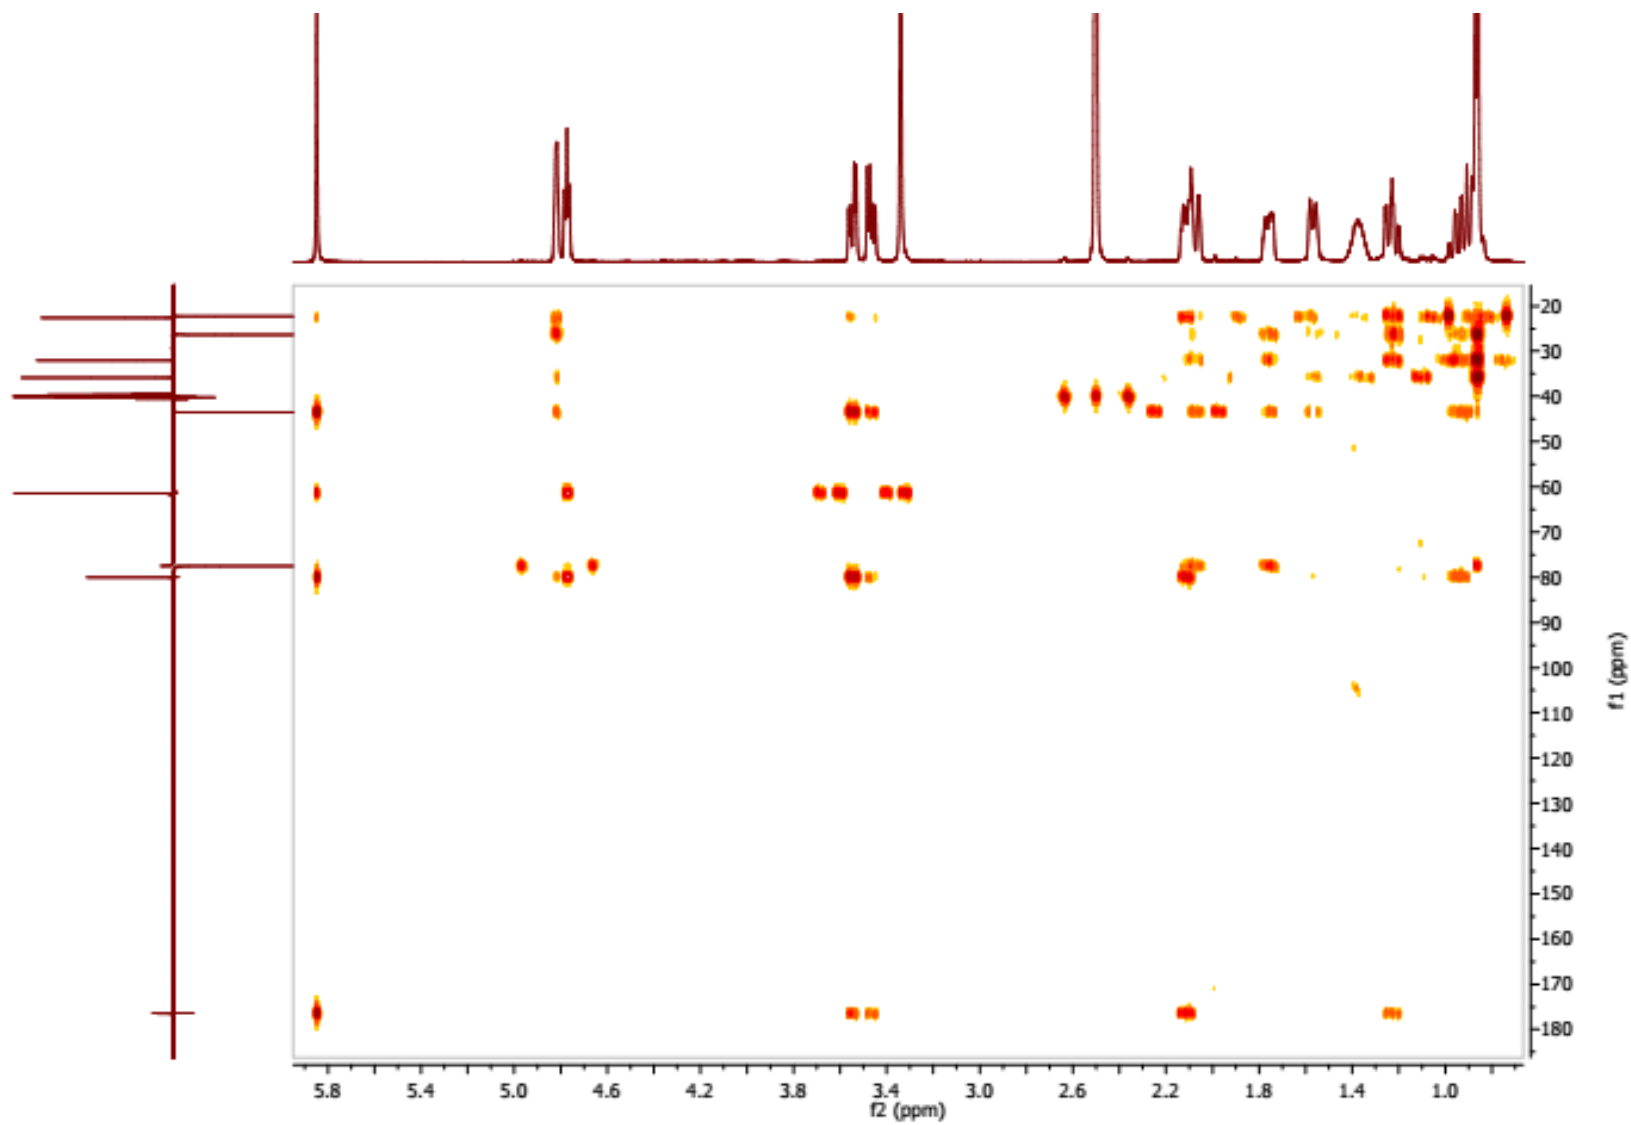

<sup>1</sup>H-NMR of compound **19**

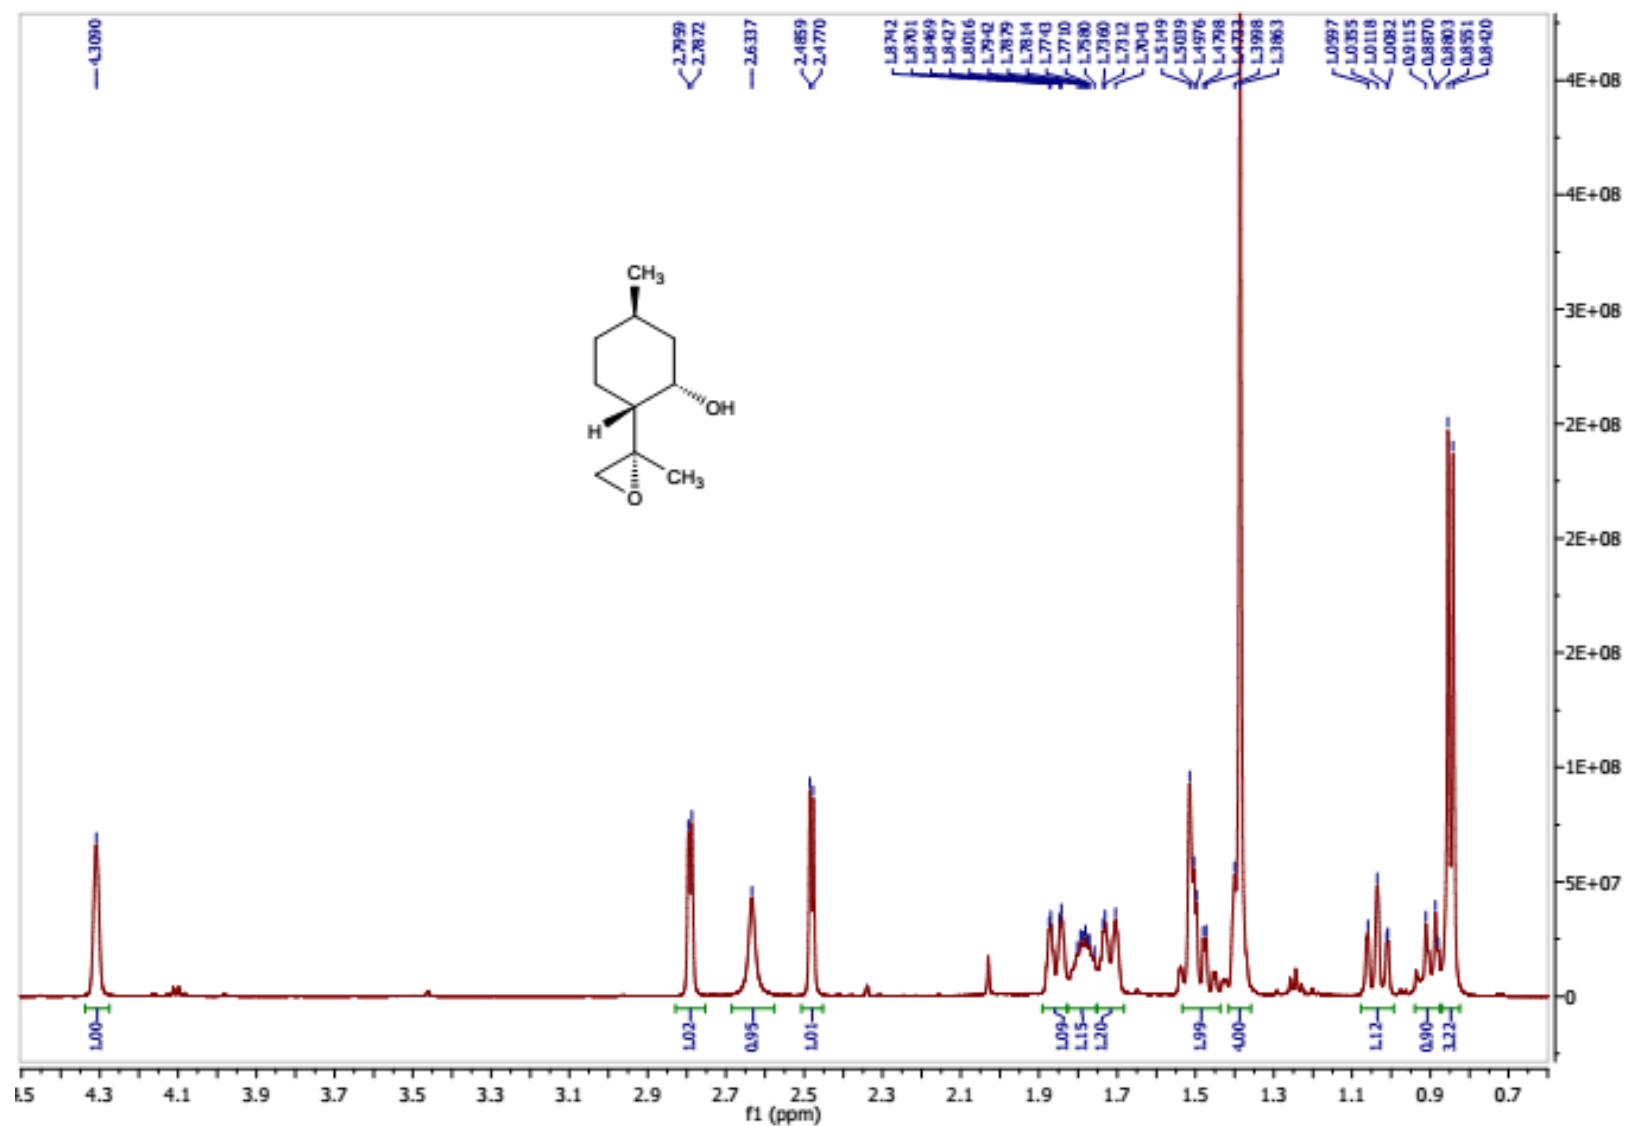

$^{13}\text{C}$ -NMR of compound **19**

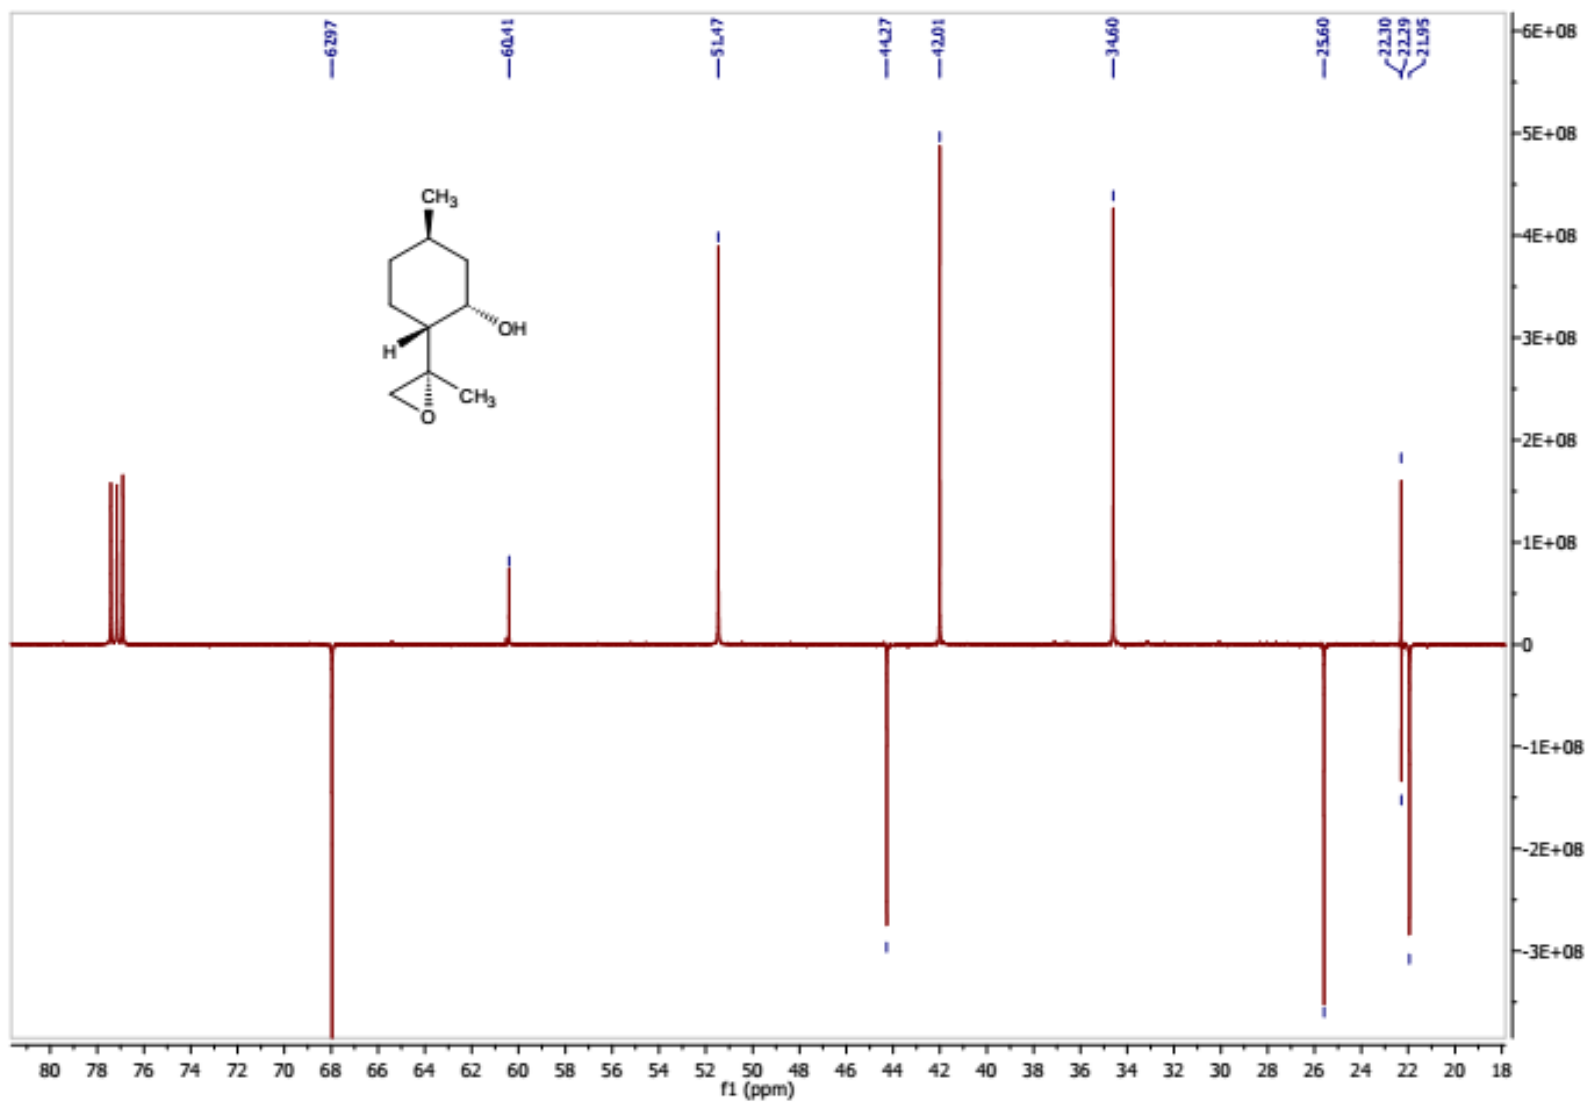

COSY of compound **20**

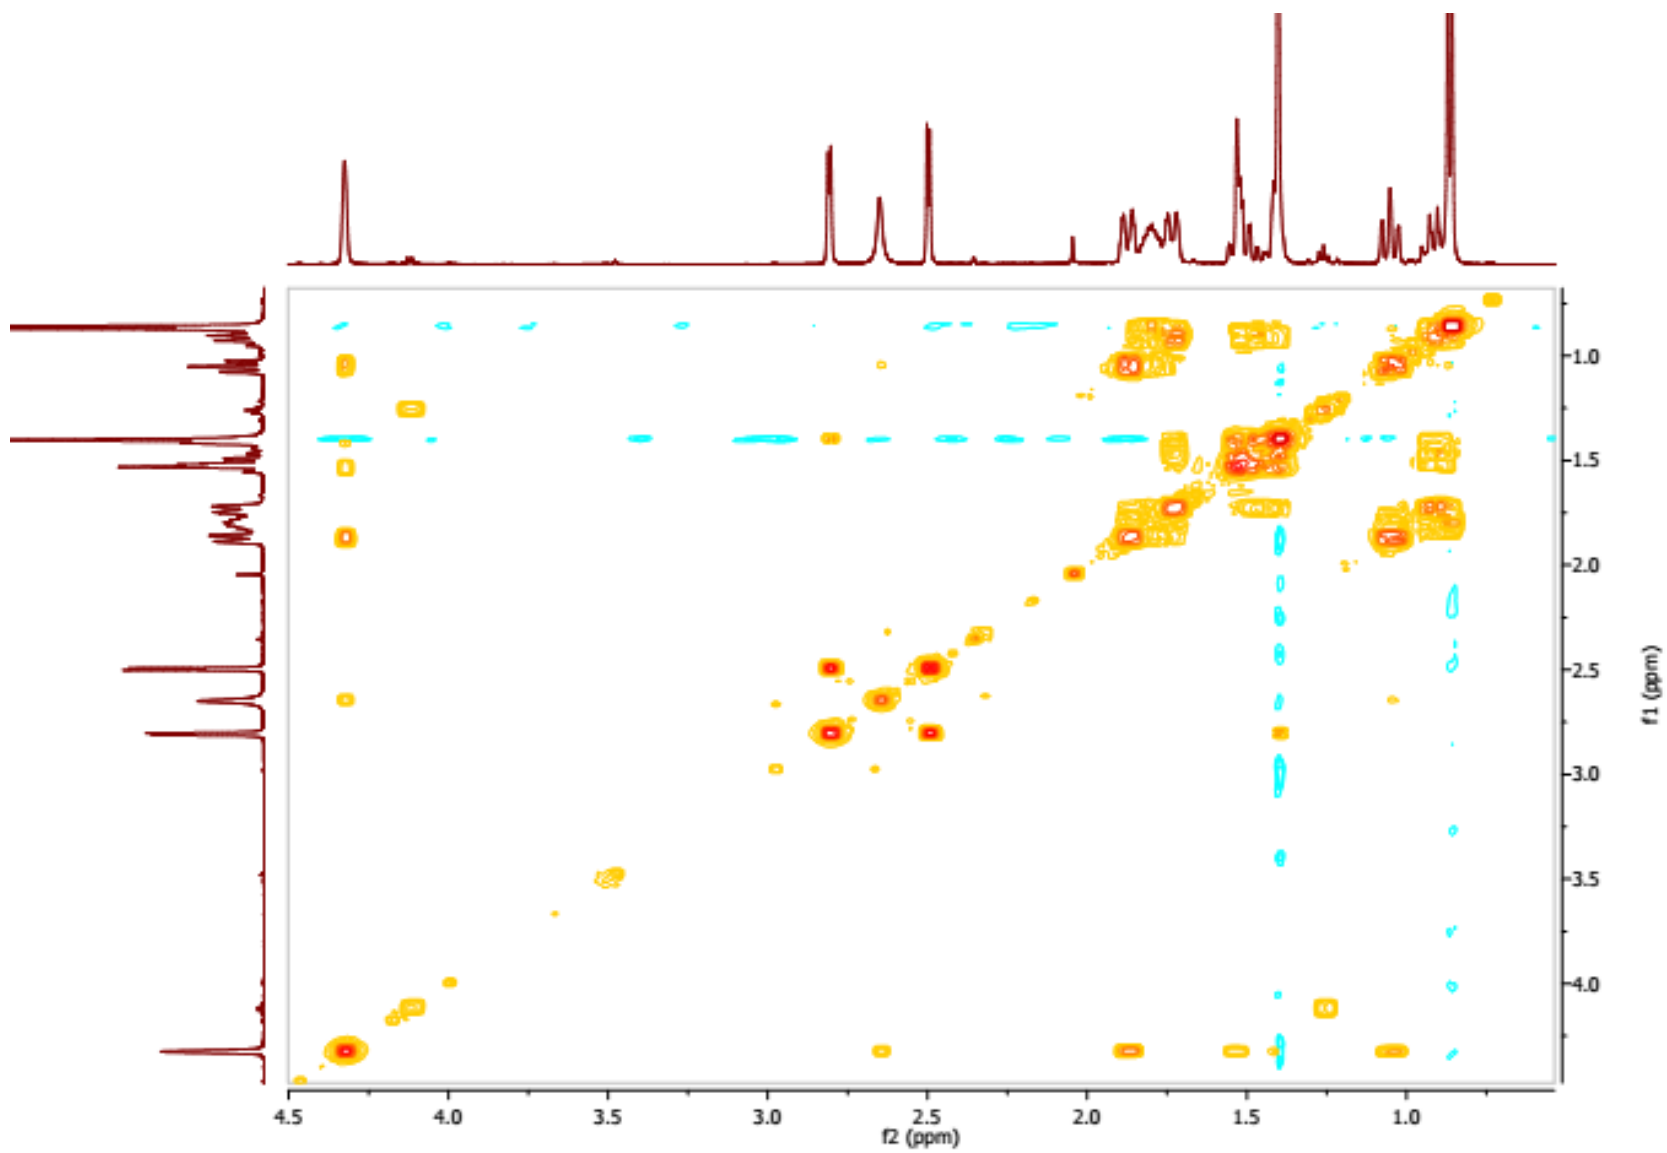

NOESY of compound **19**

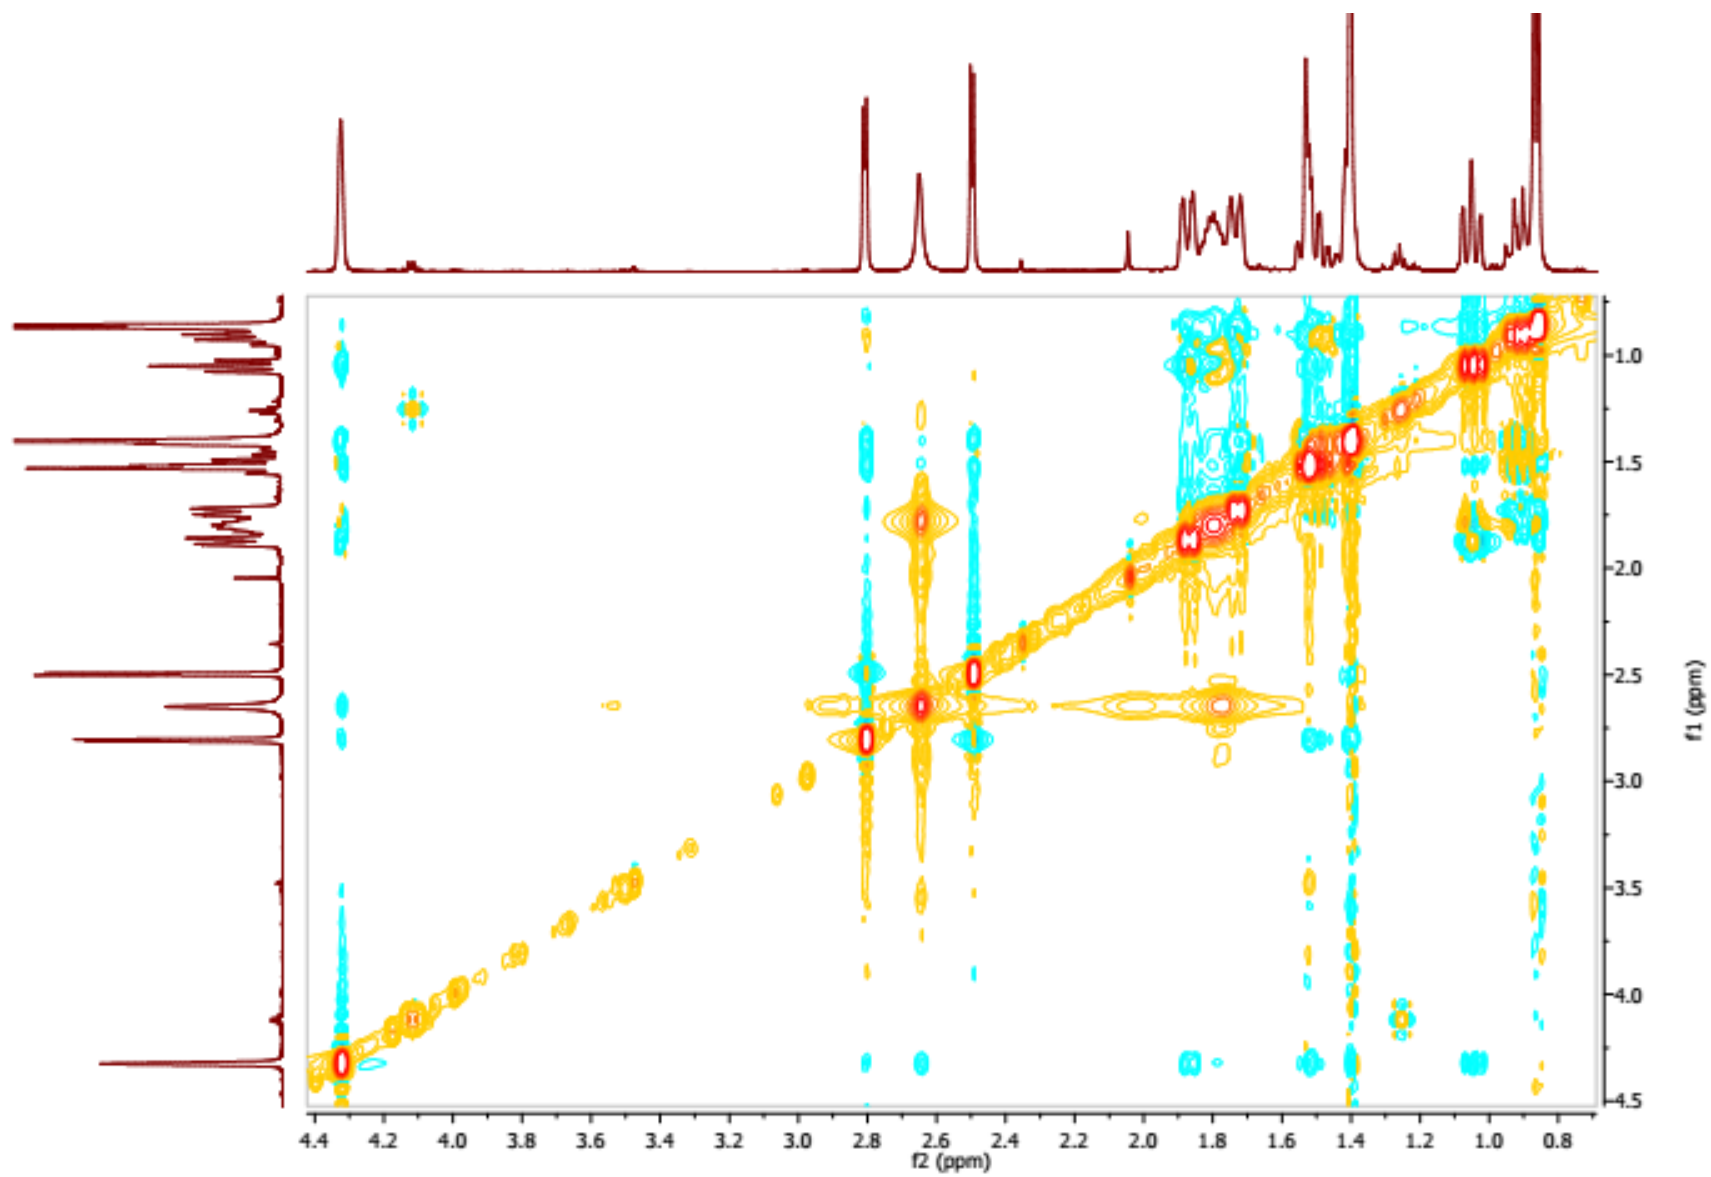

HSQC of compound **19**

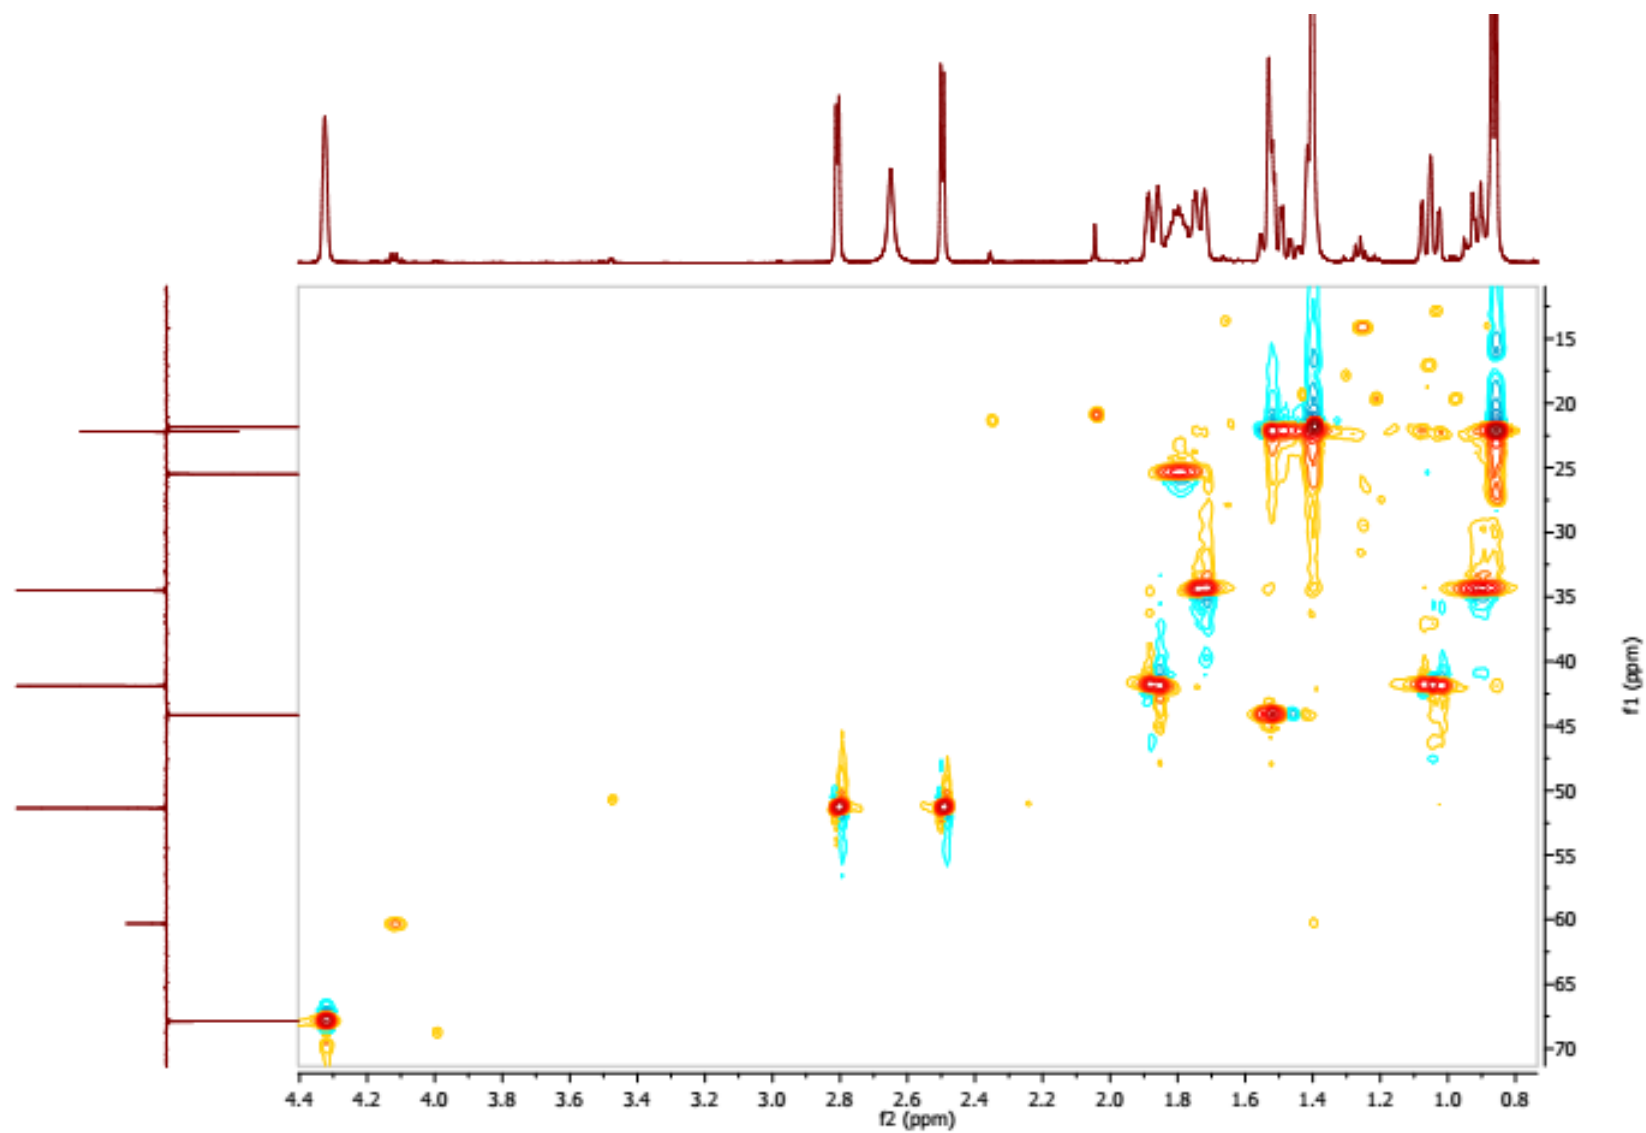



HMBC of compound **19**

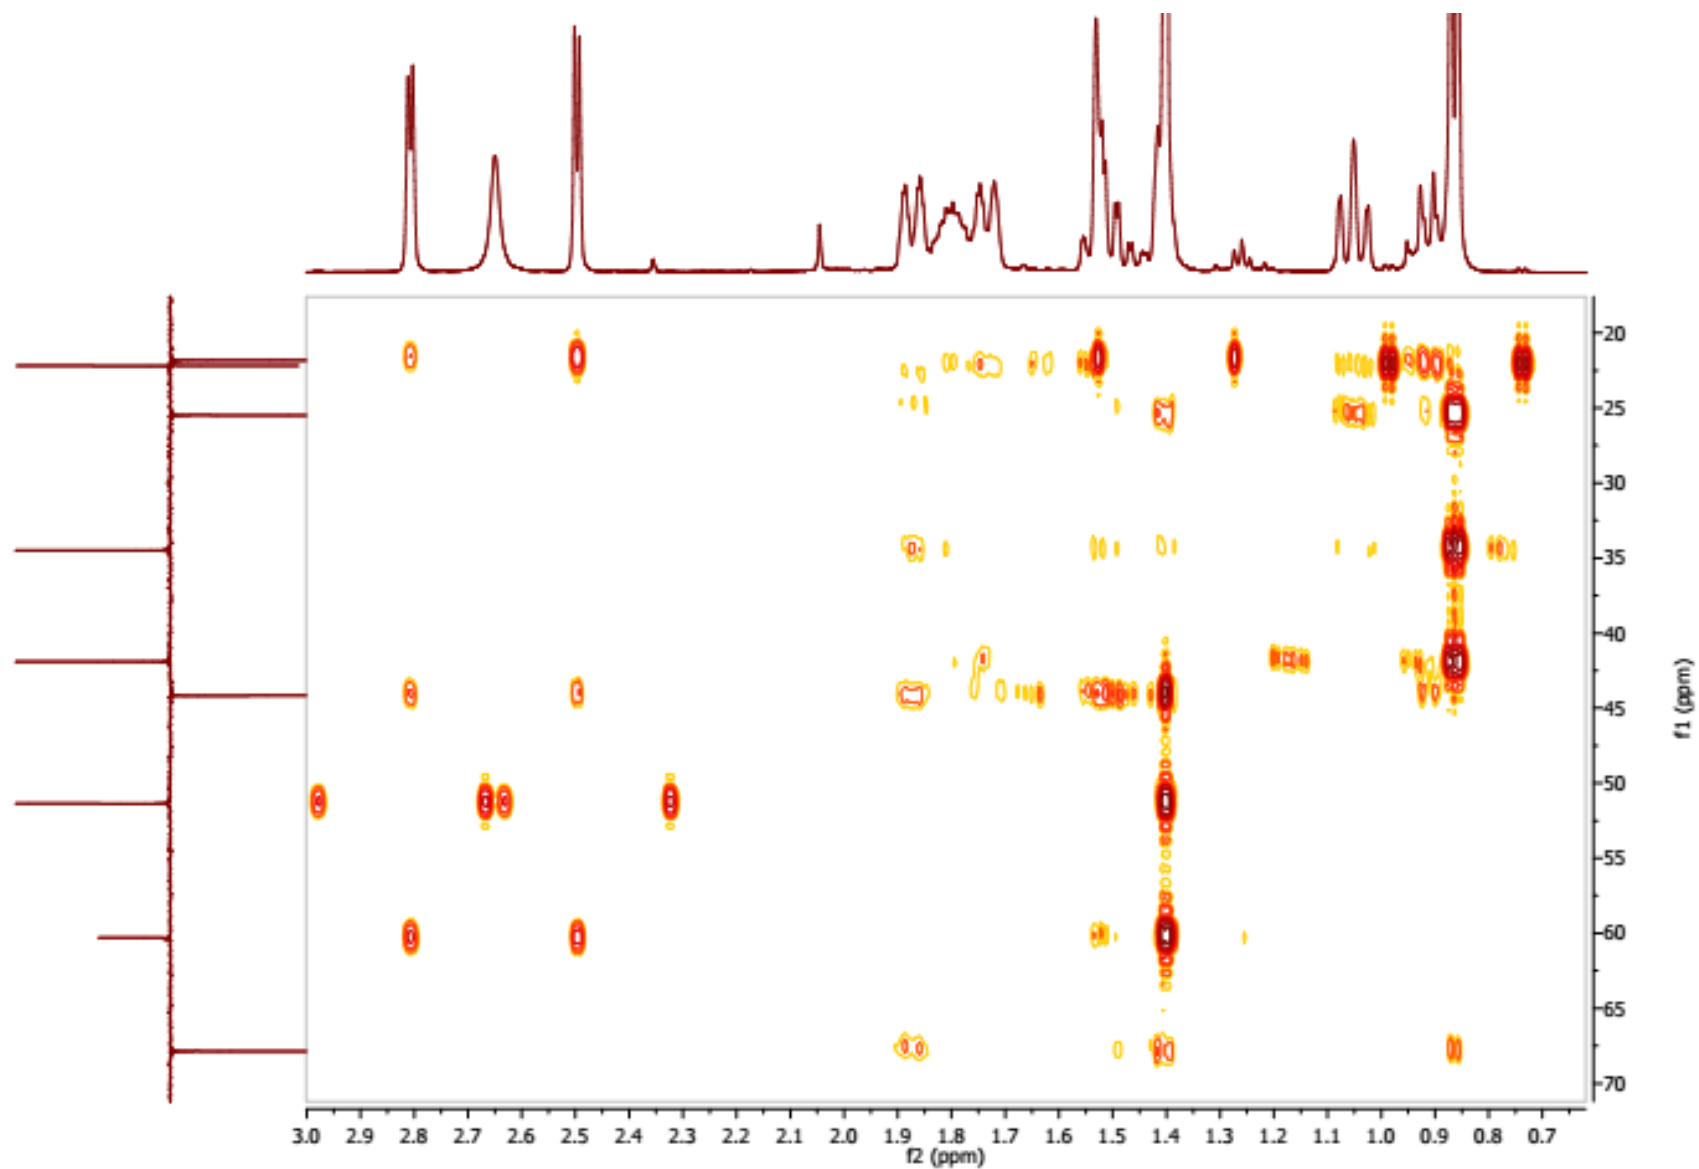

$^1\text{H-NMR}$  of compound **20**

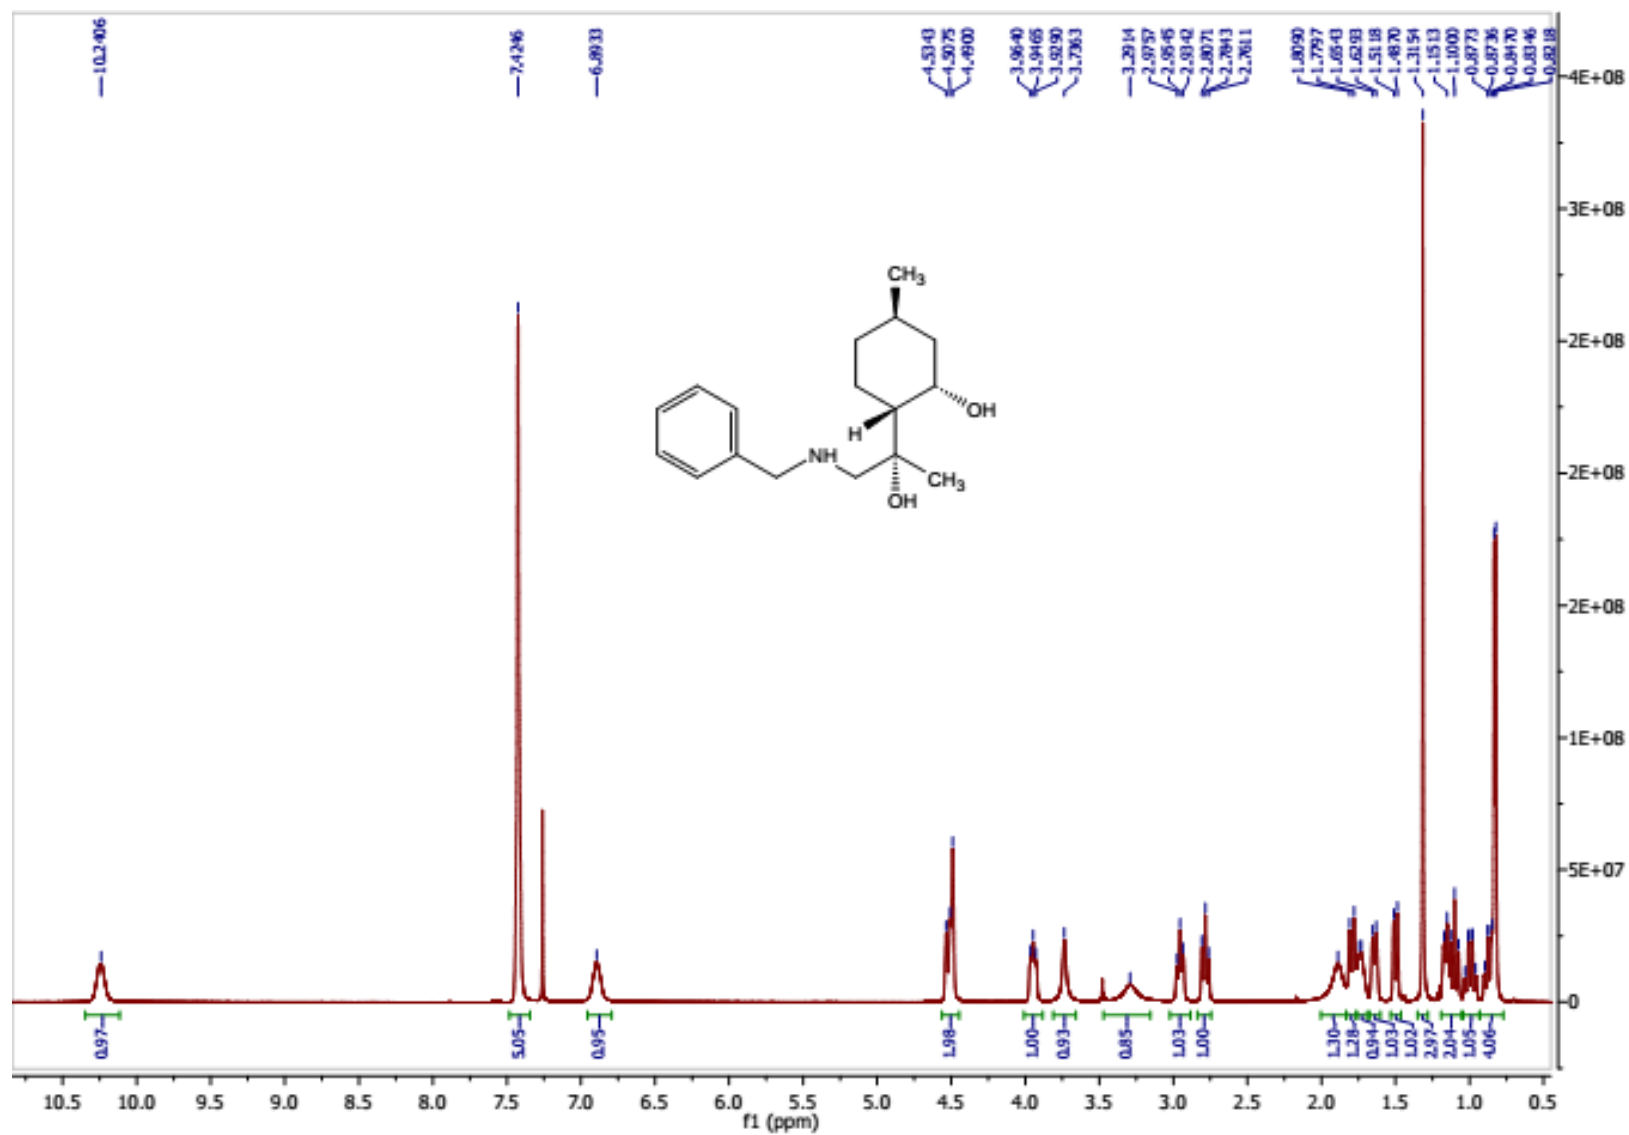

$^{13}\text{C}$ -NMR of compound **20**

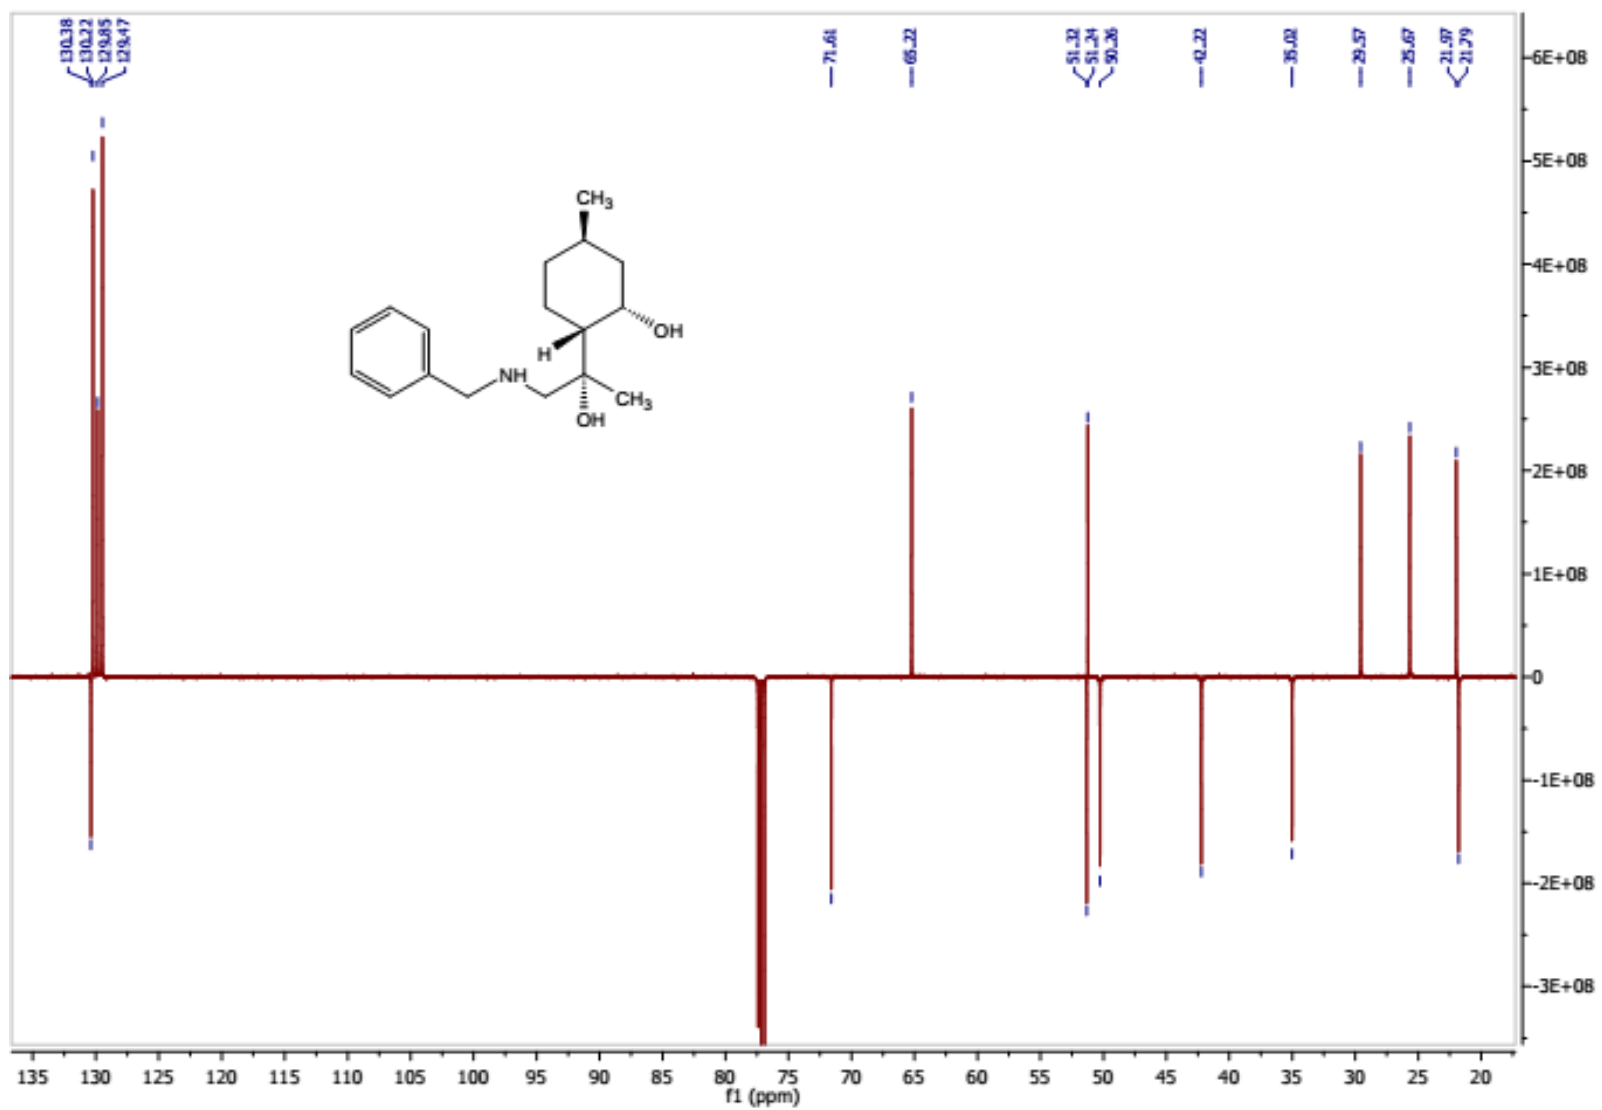

COSY of compound **20**

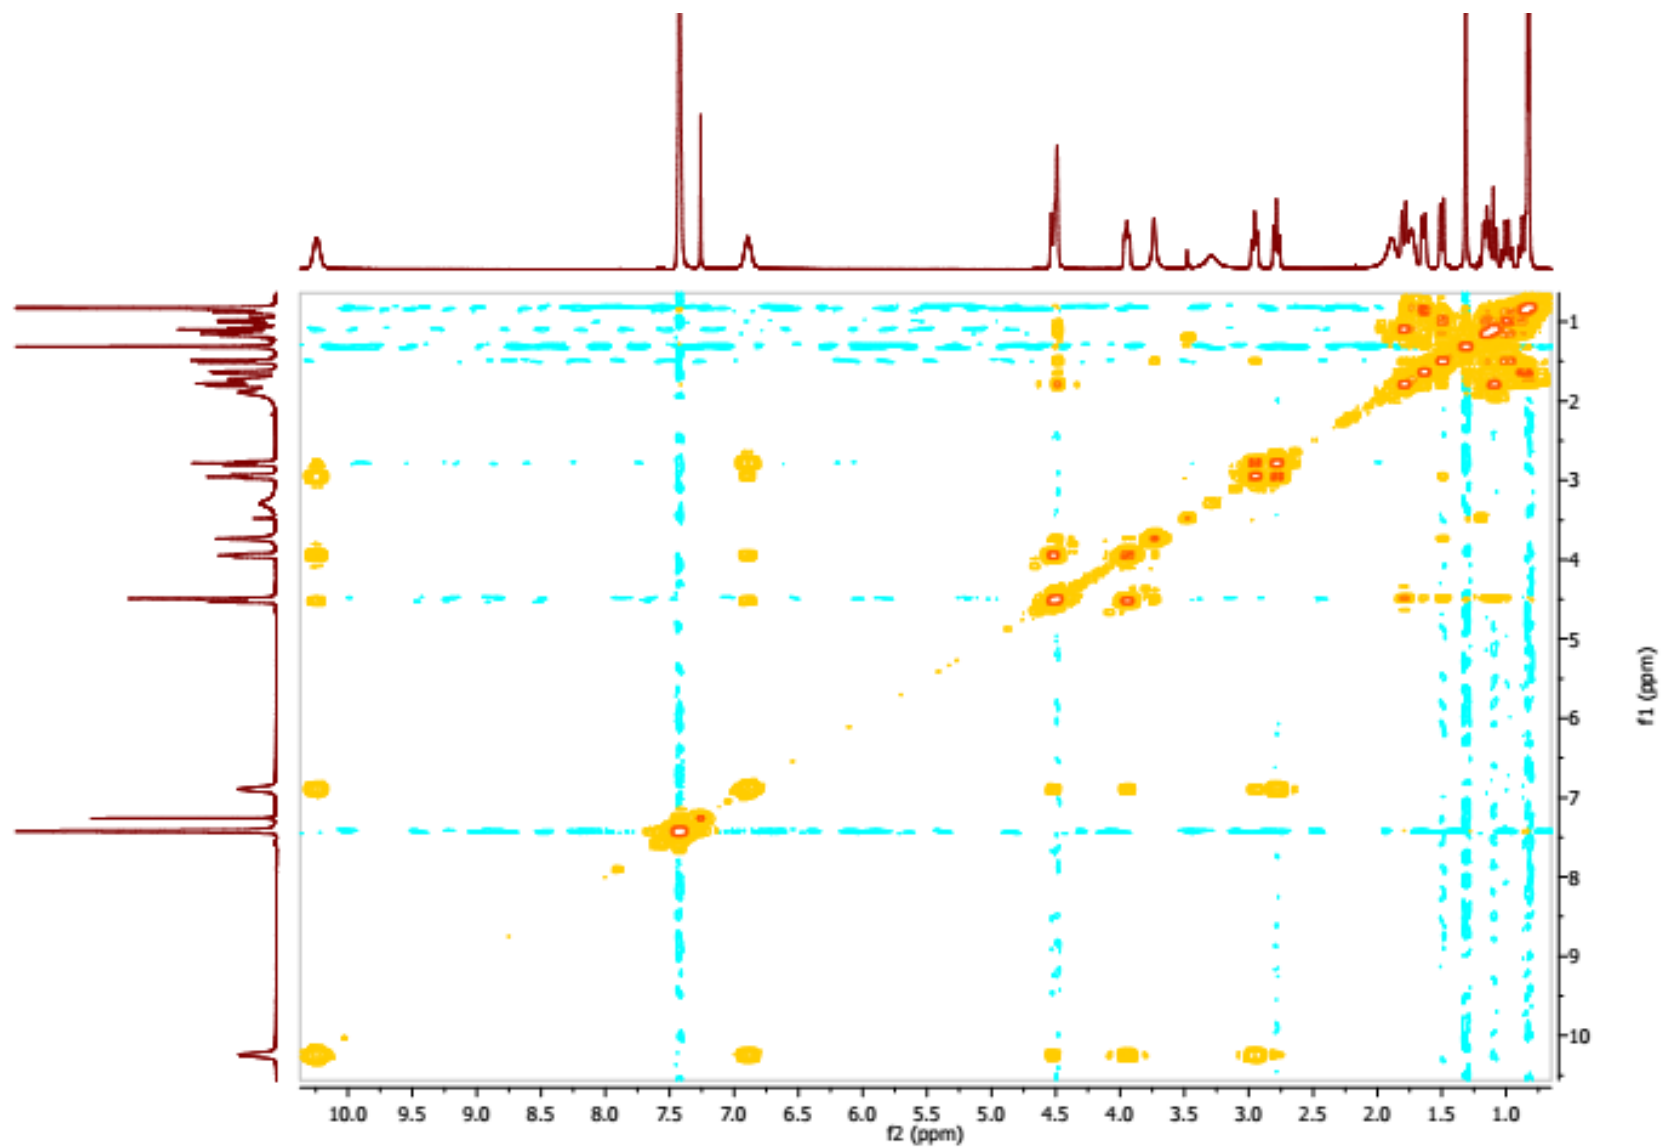

NOESY of compound **20**

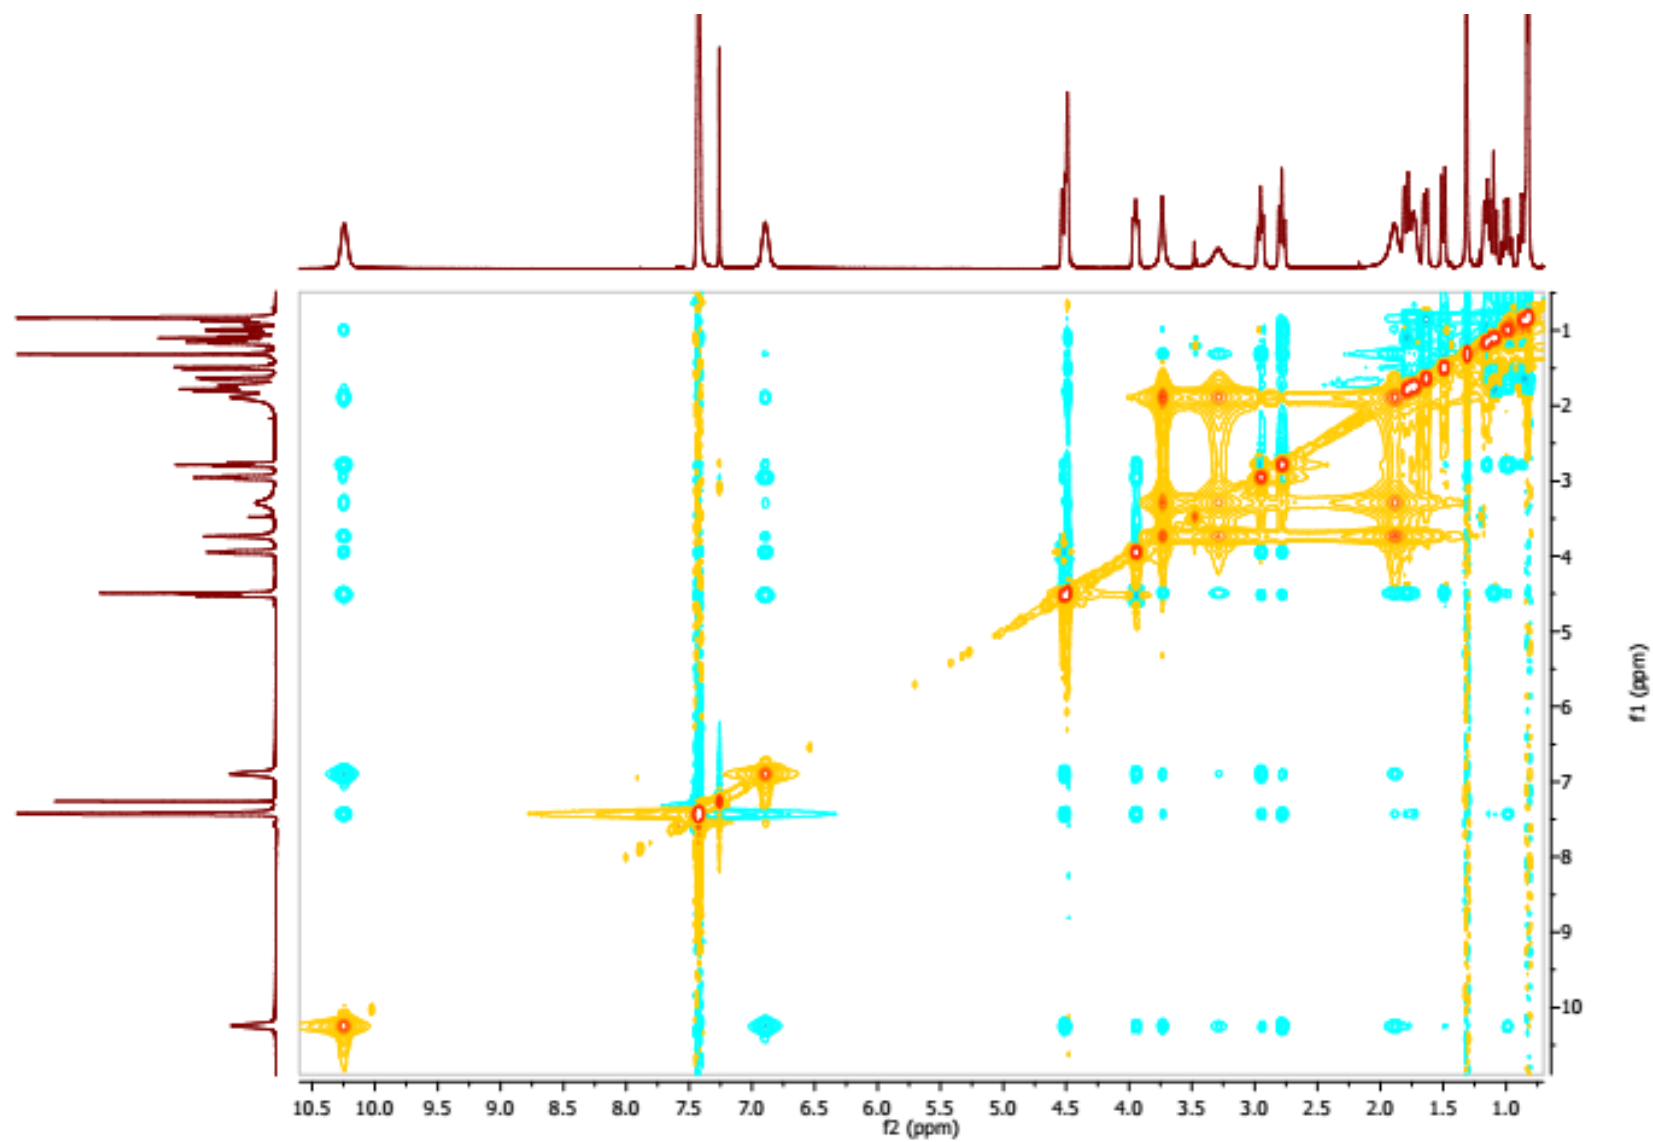

HSQC of compound **20**

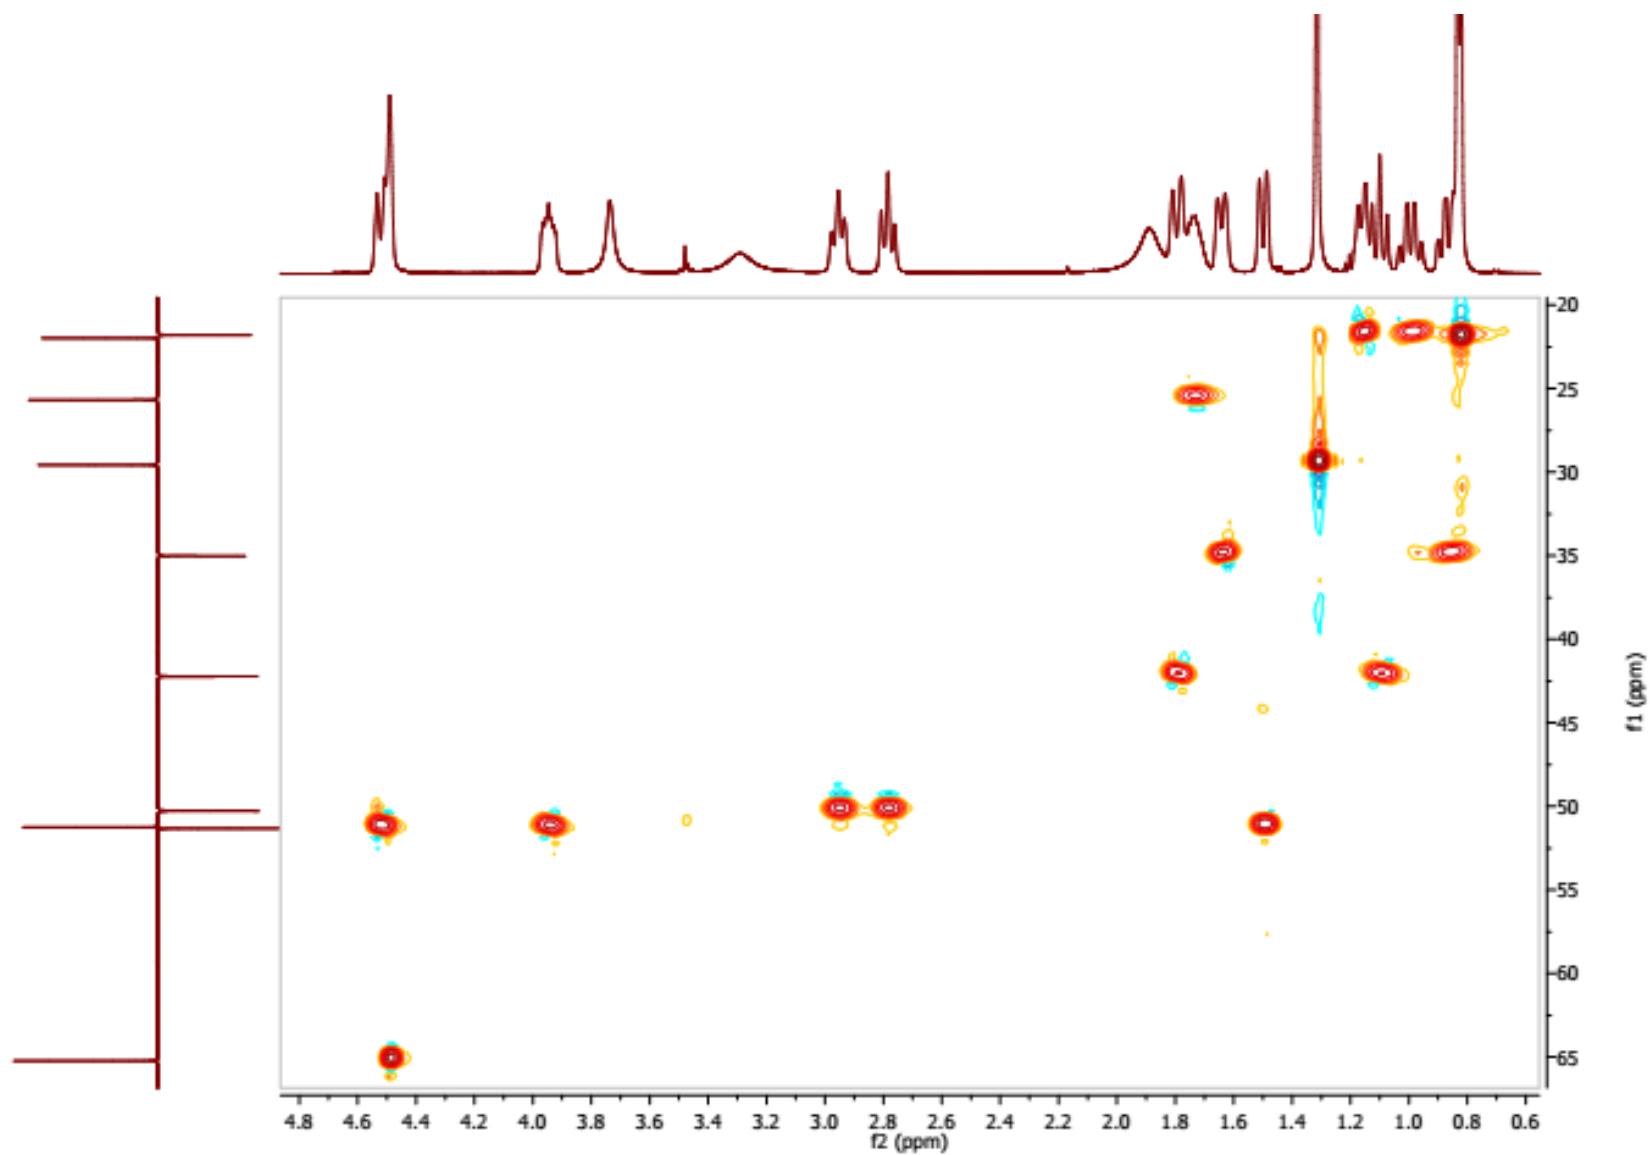

HMBC of compound 20

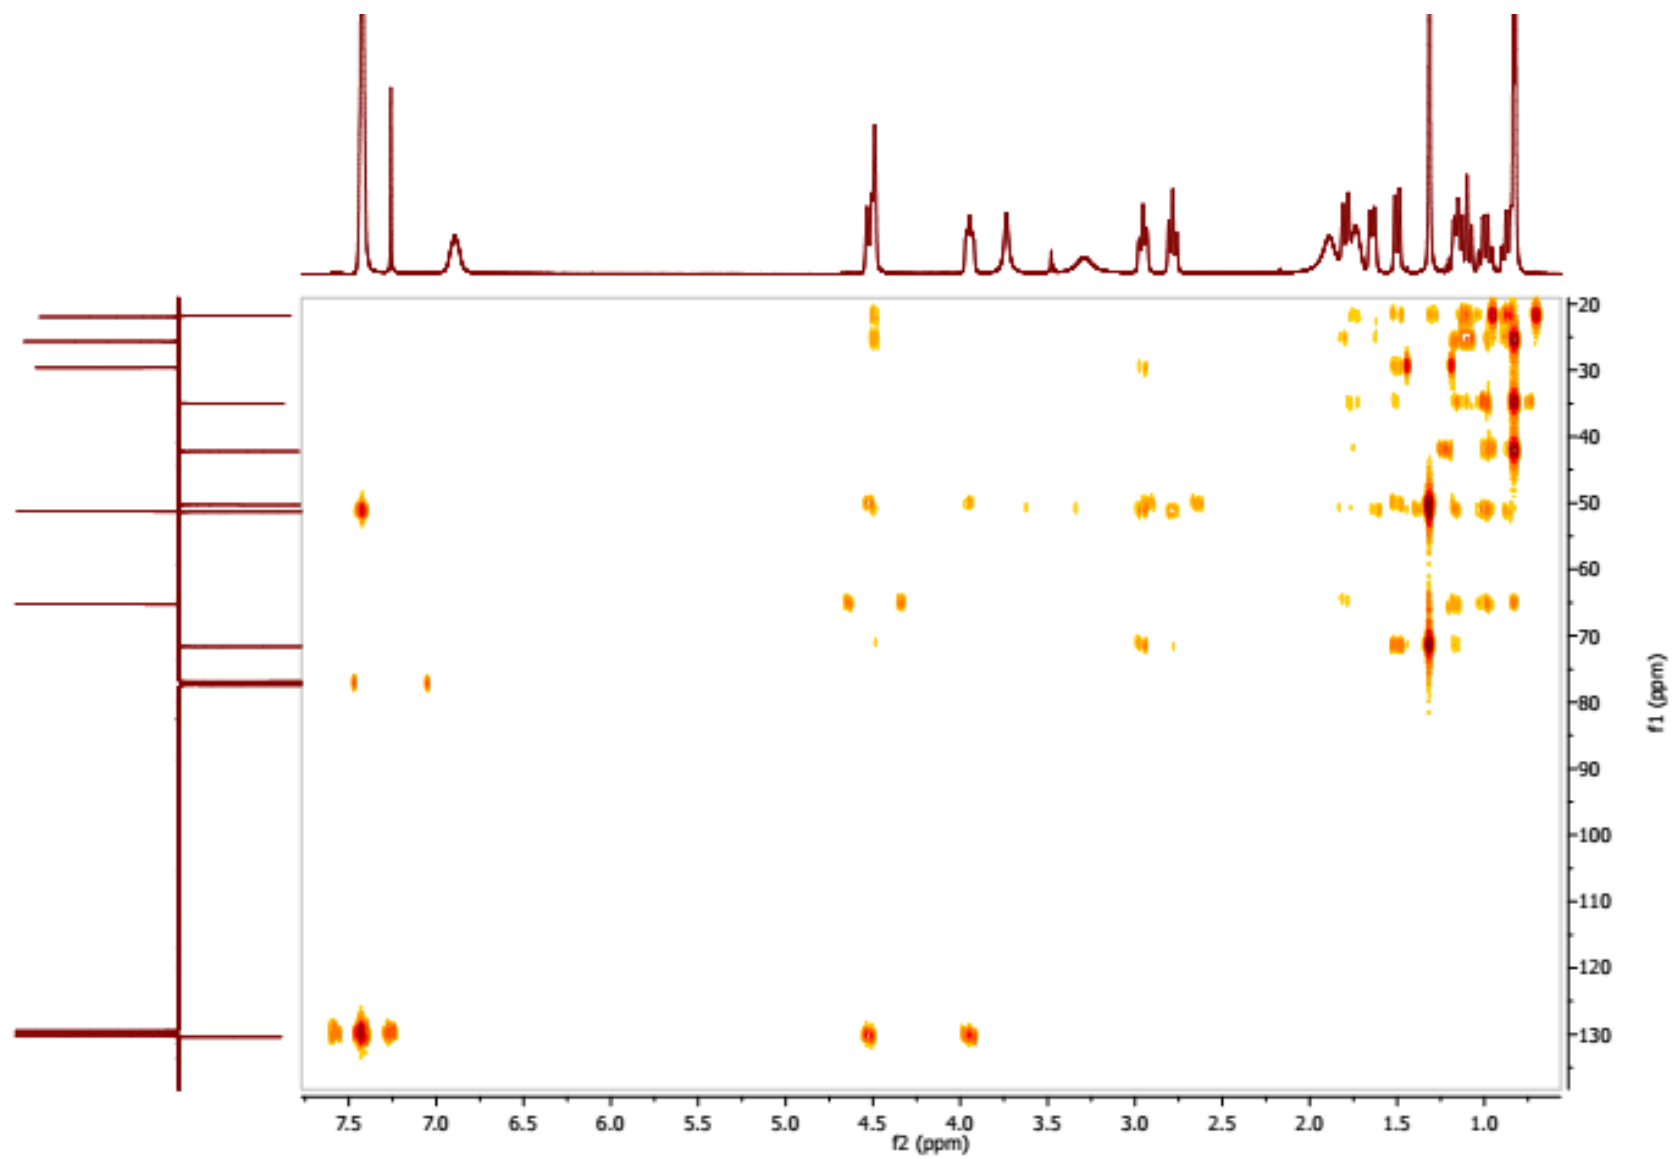

<sup>1</sup>H-NMR of compound **21**

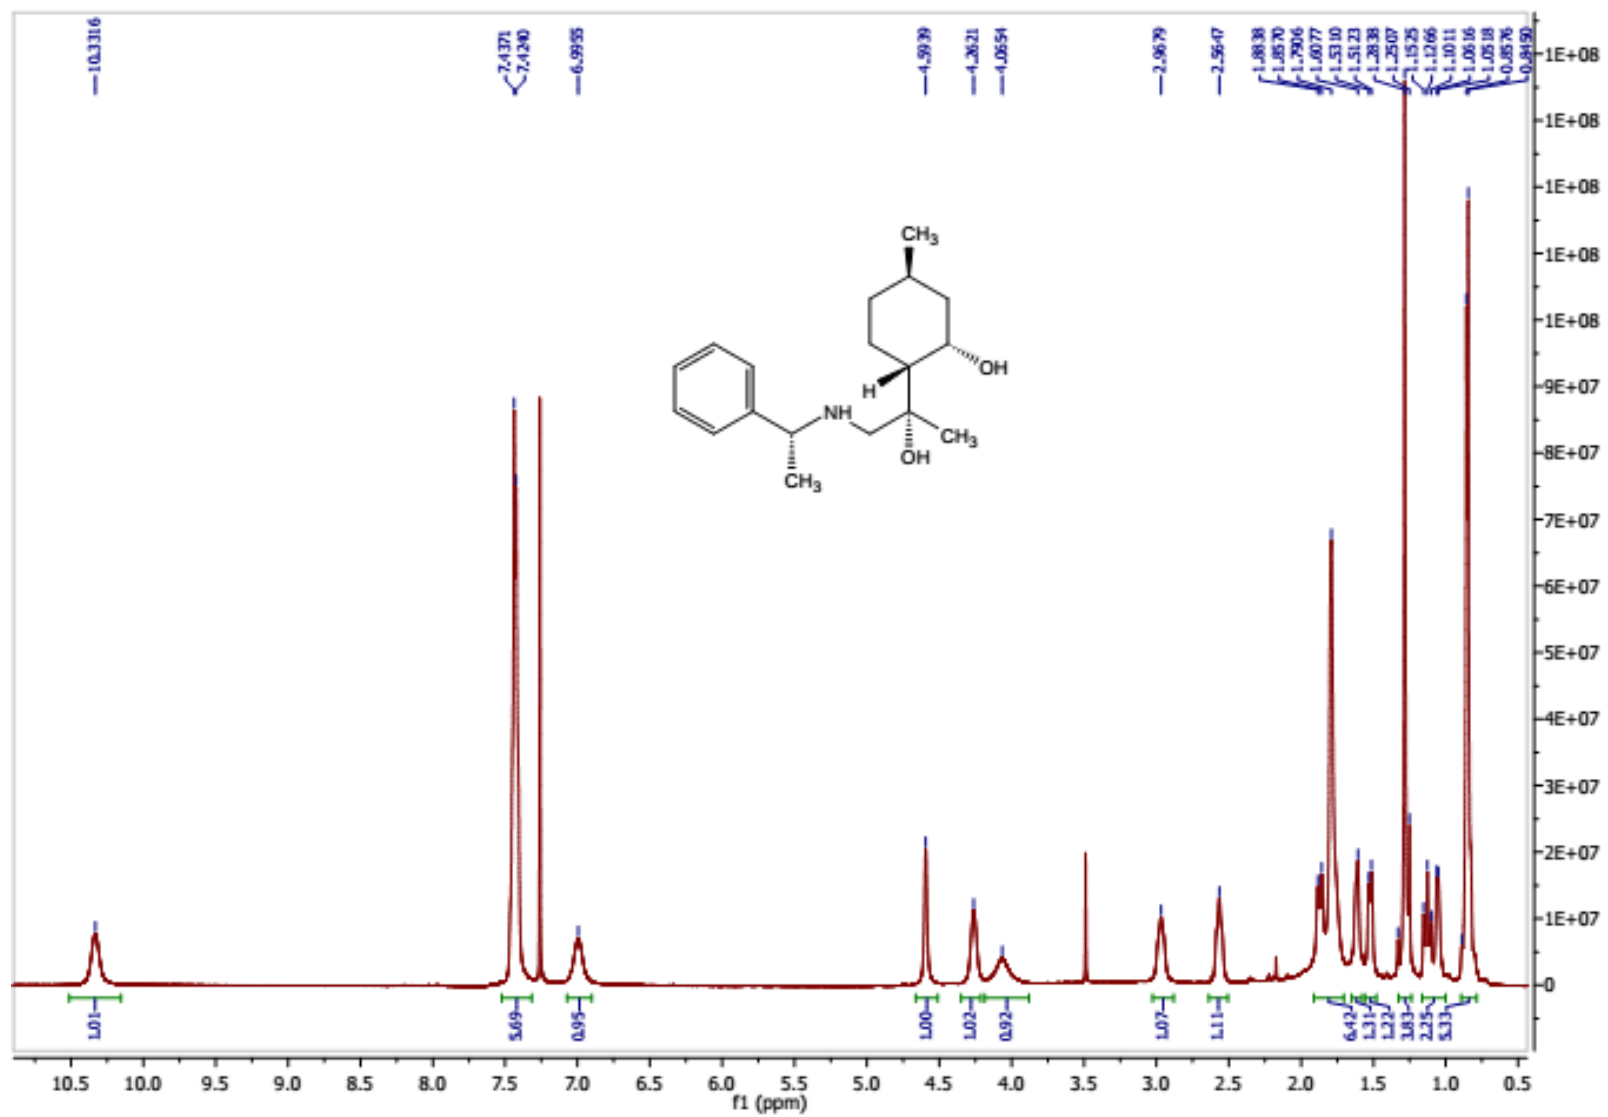



$^{13}\text{C}$ -NMR of compound **21**

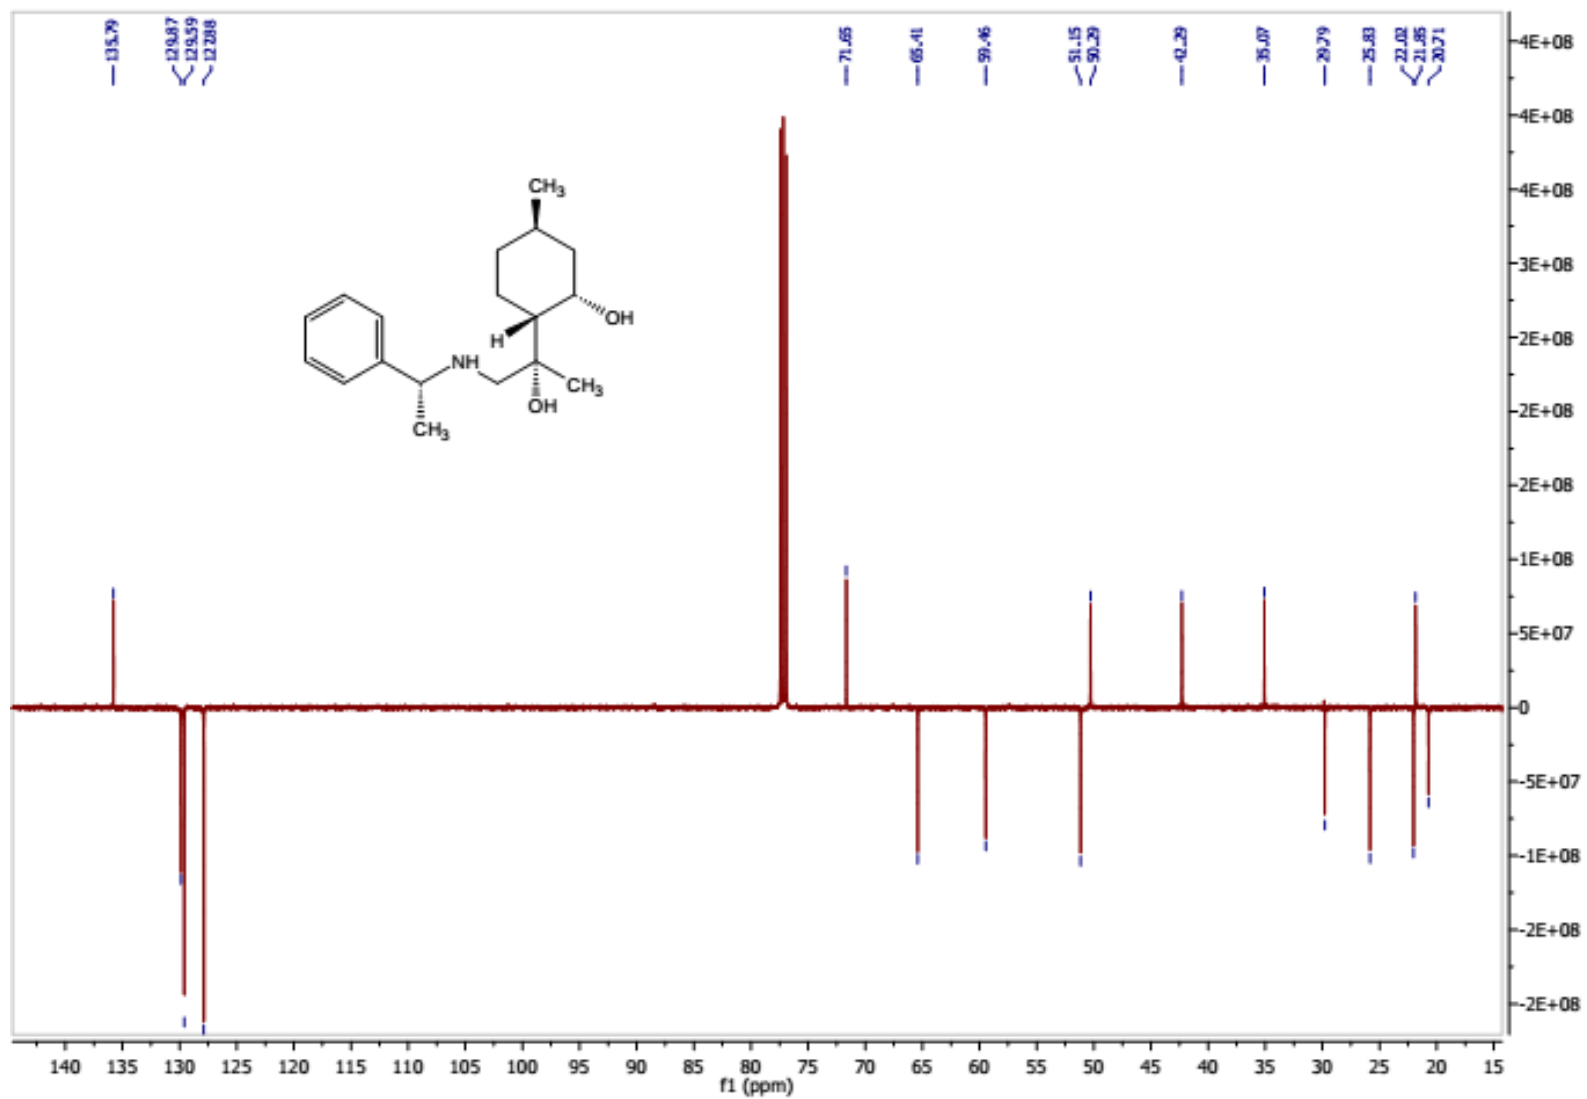

COSY of compound **21**

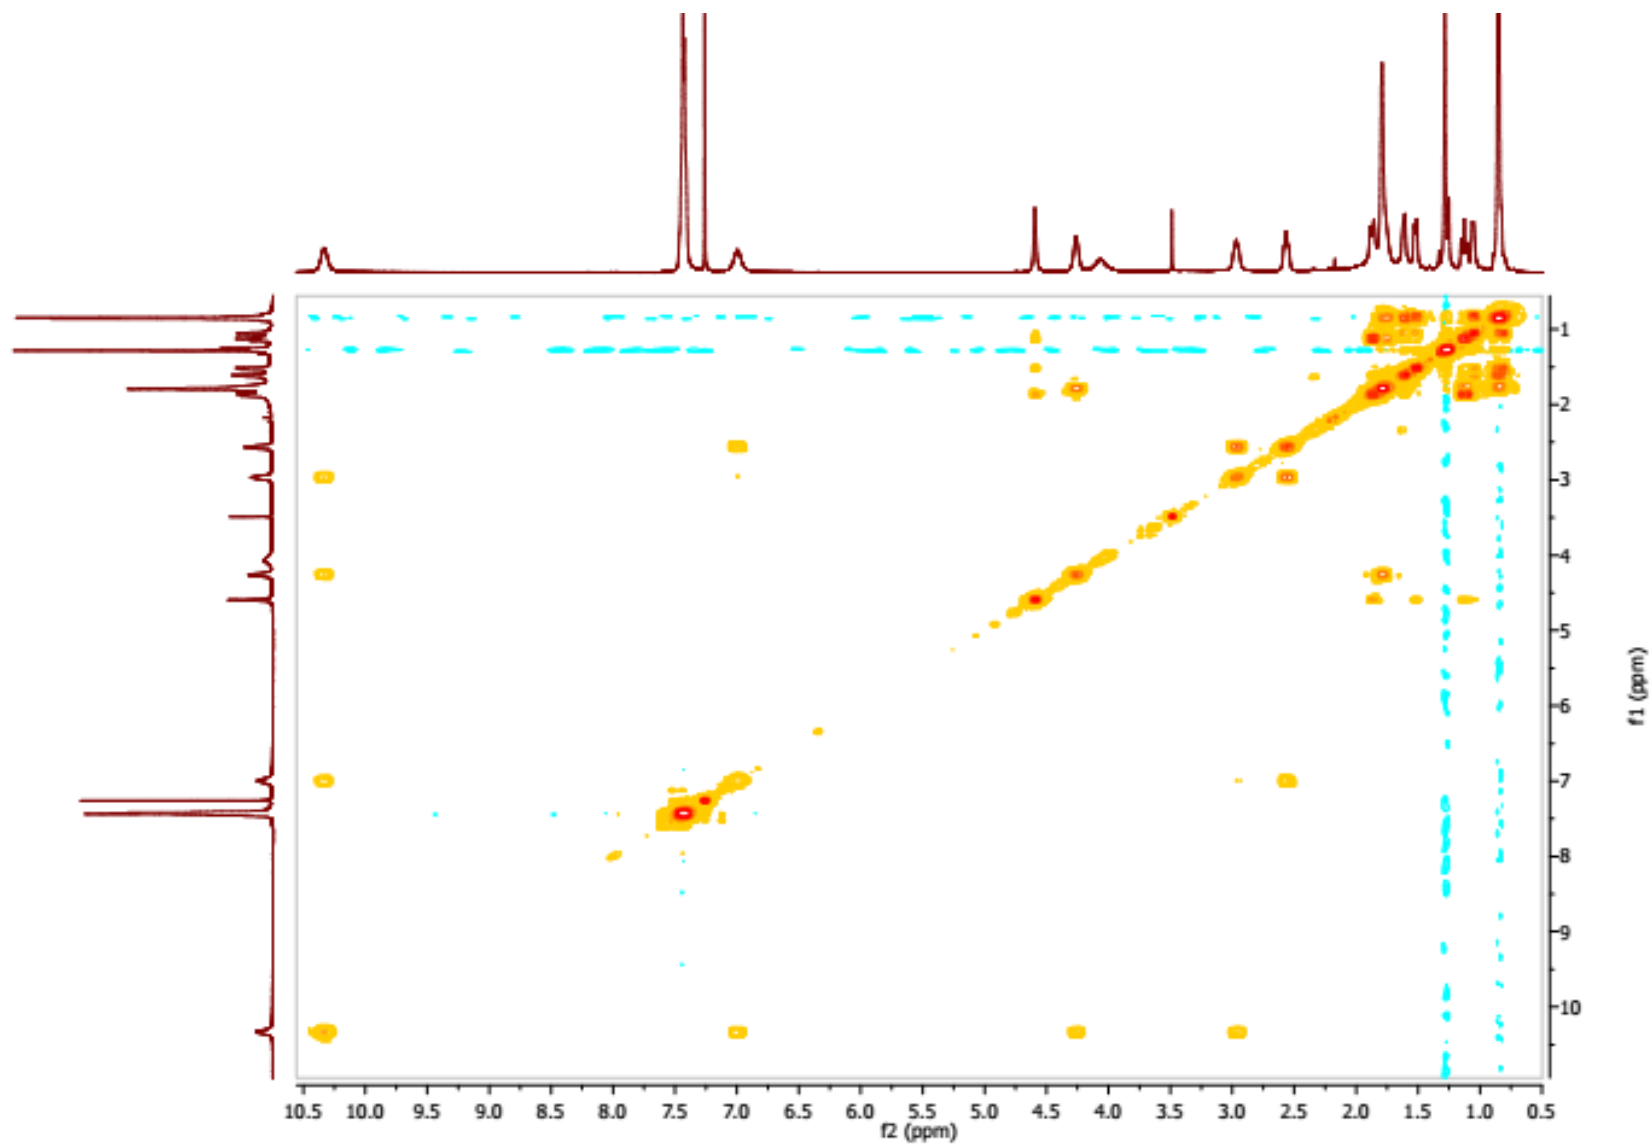

NOESY of compound **21**

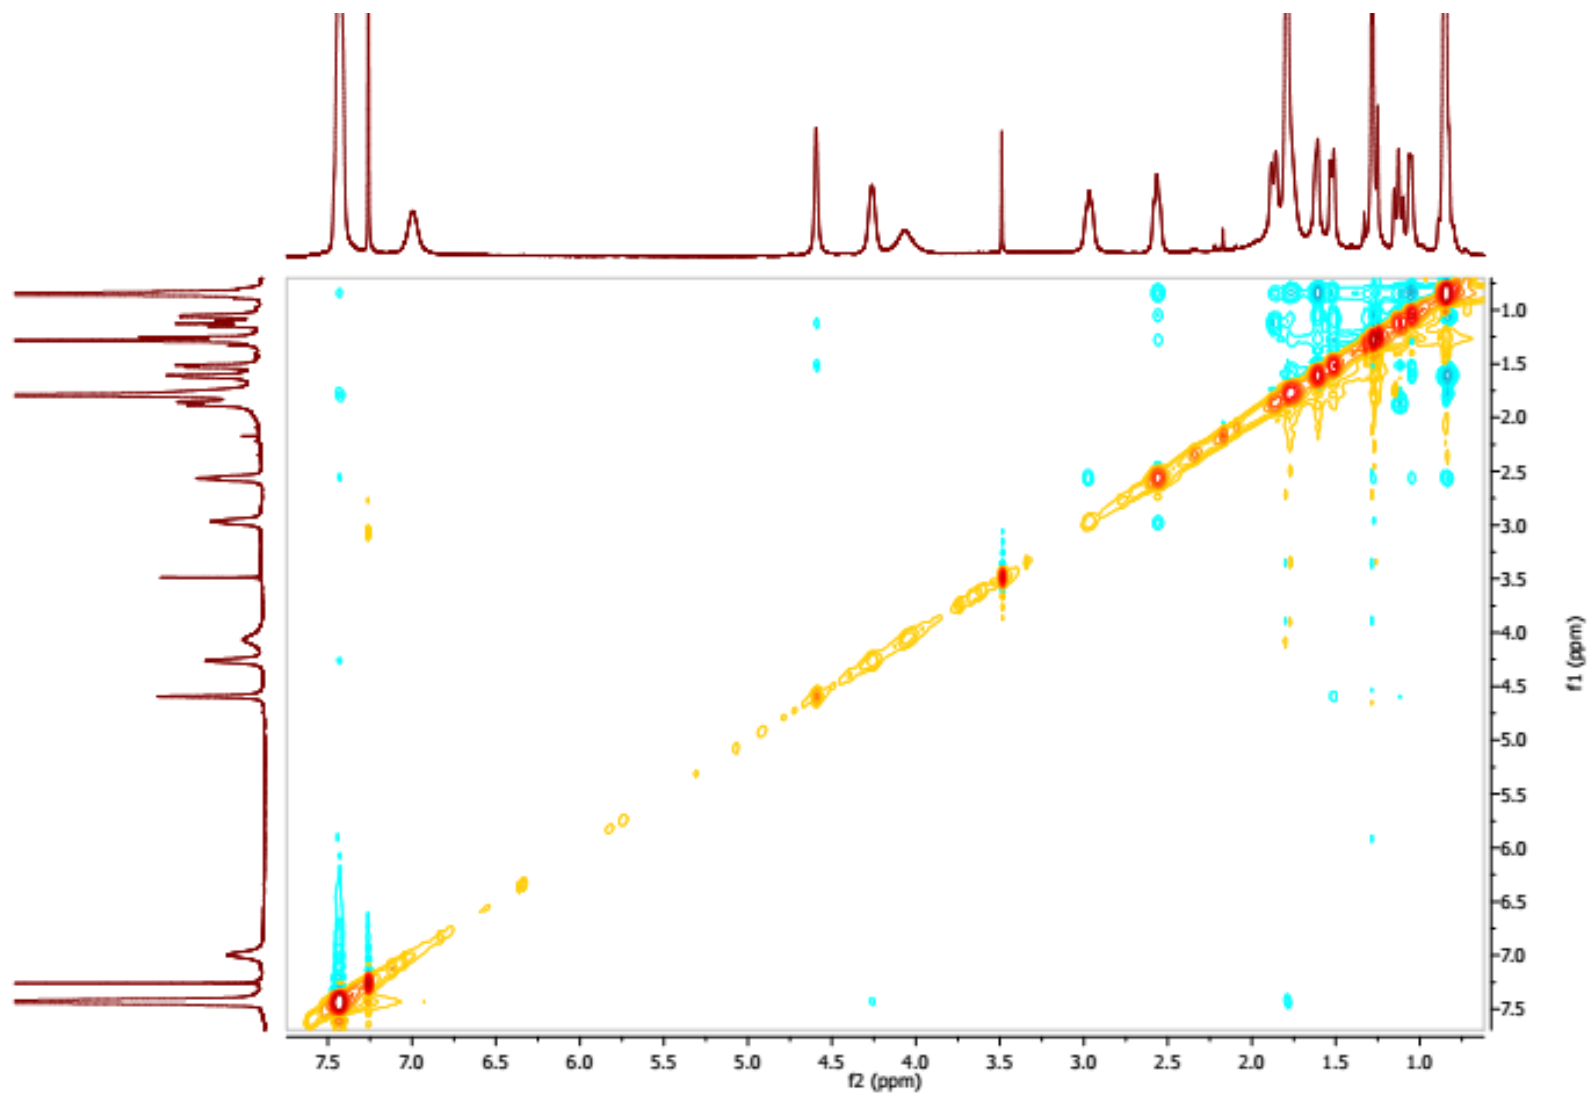

HSQC of compound **21**

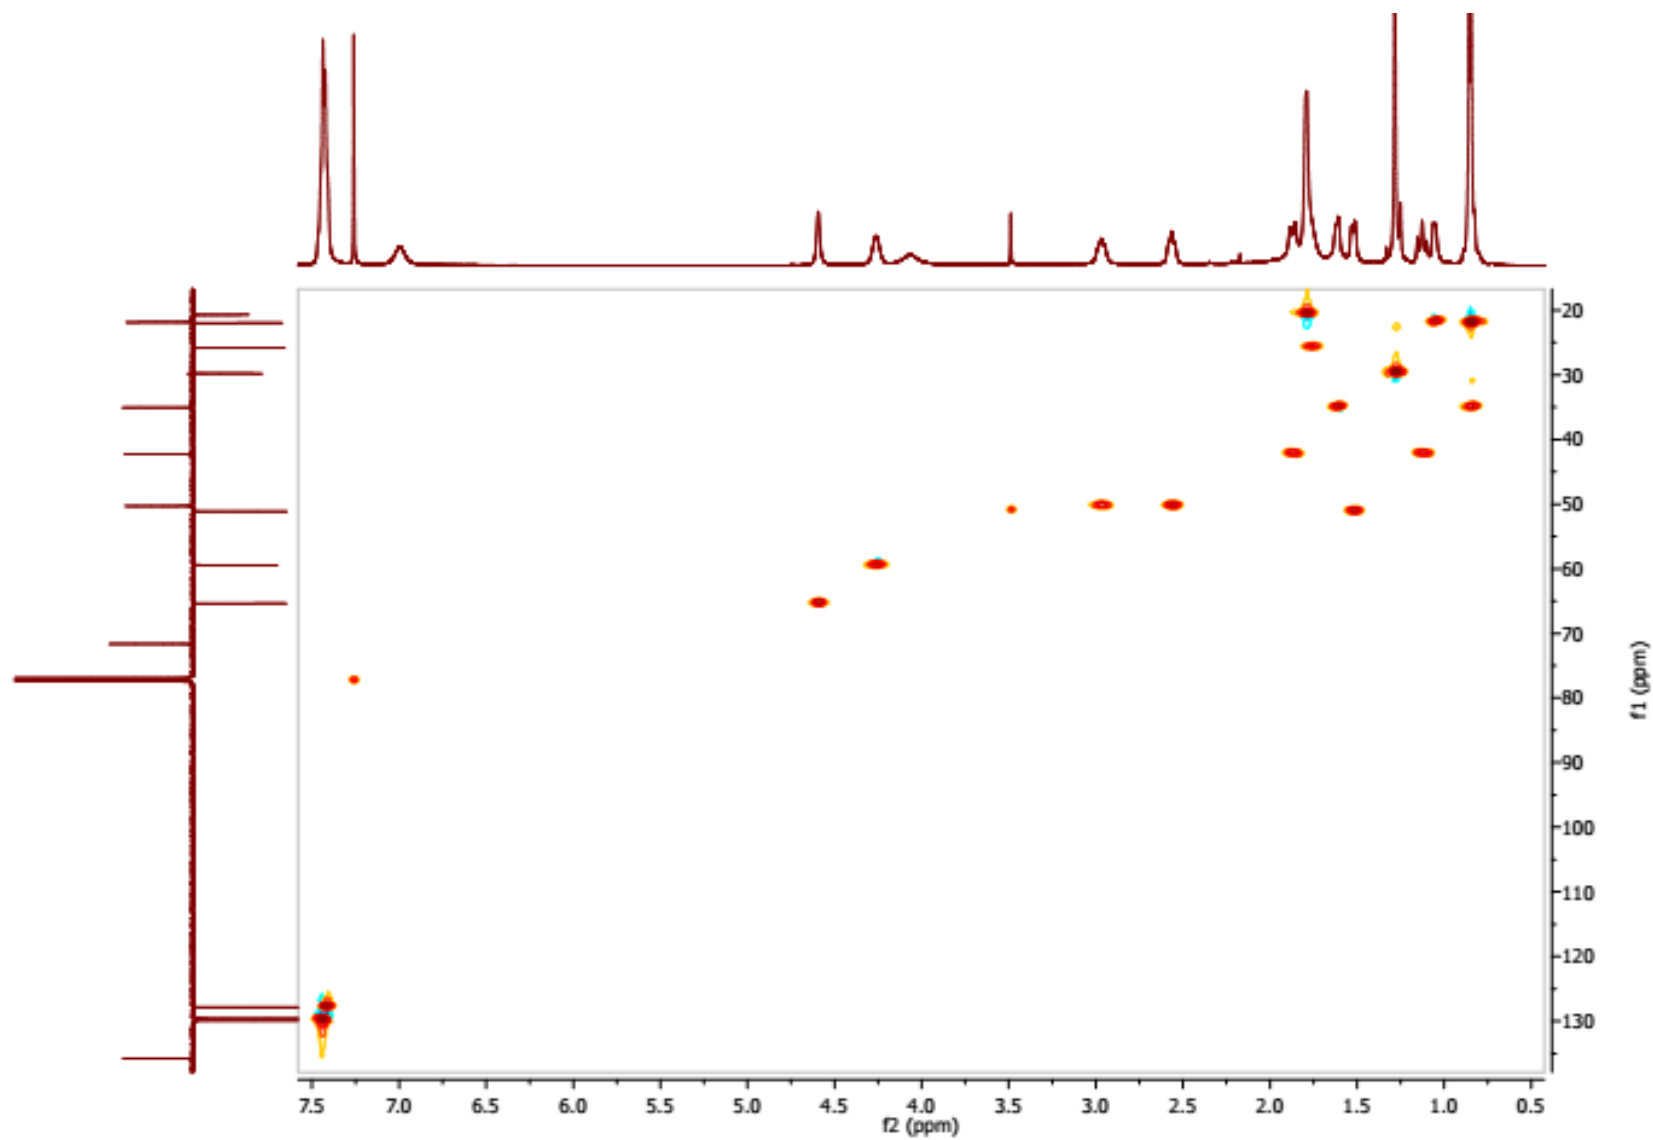

HMBC of compound 21

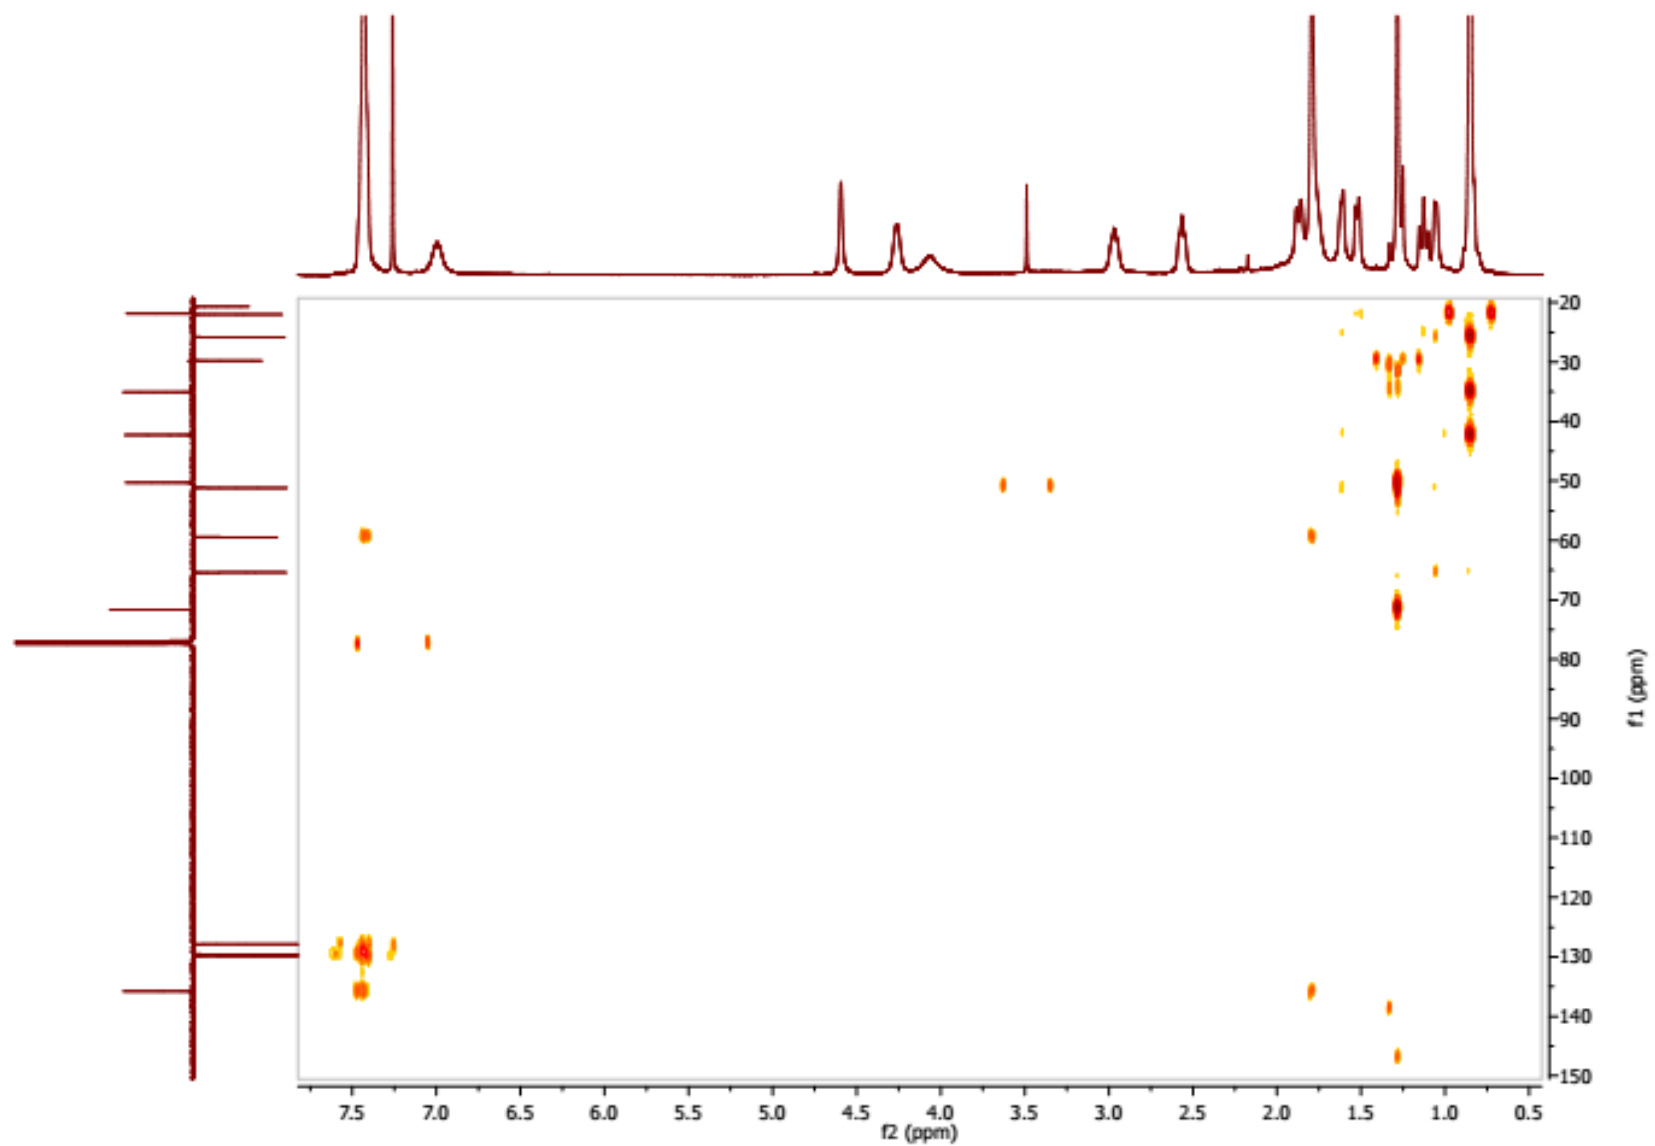

$^1\text{H-NMR}$  of compound **22**

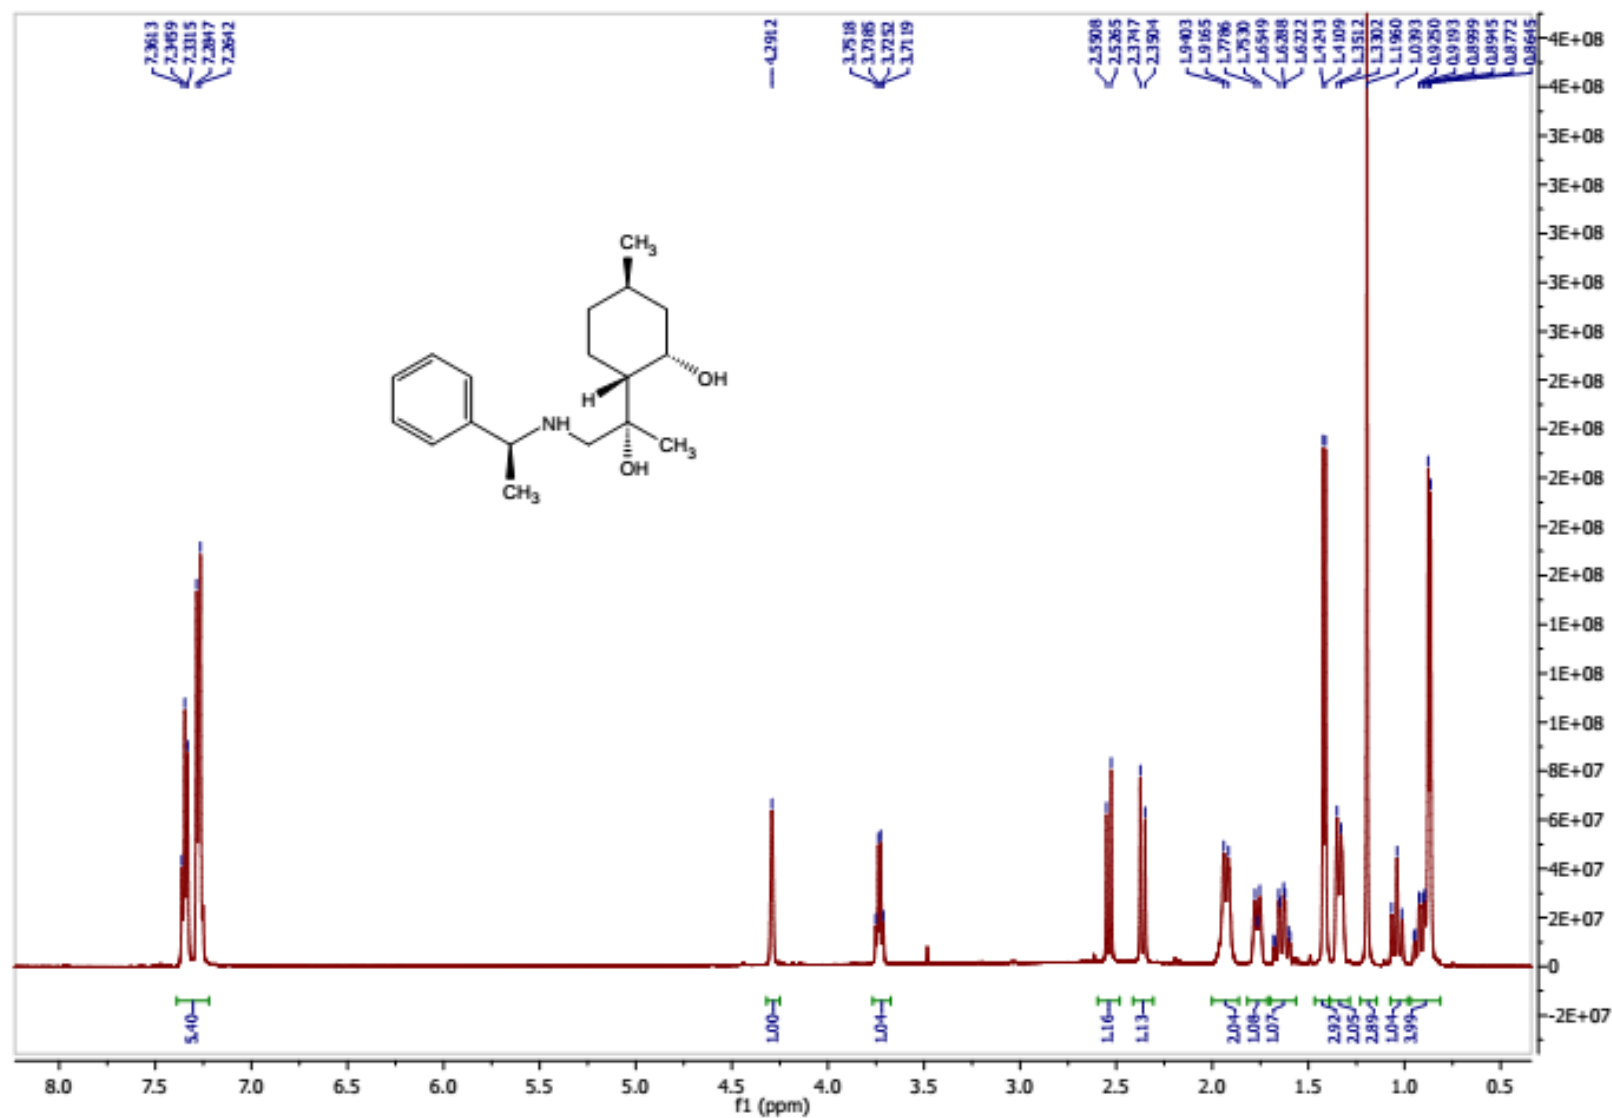

$^{13}\text{C}$ -NMR of compound 22

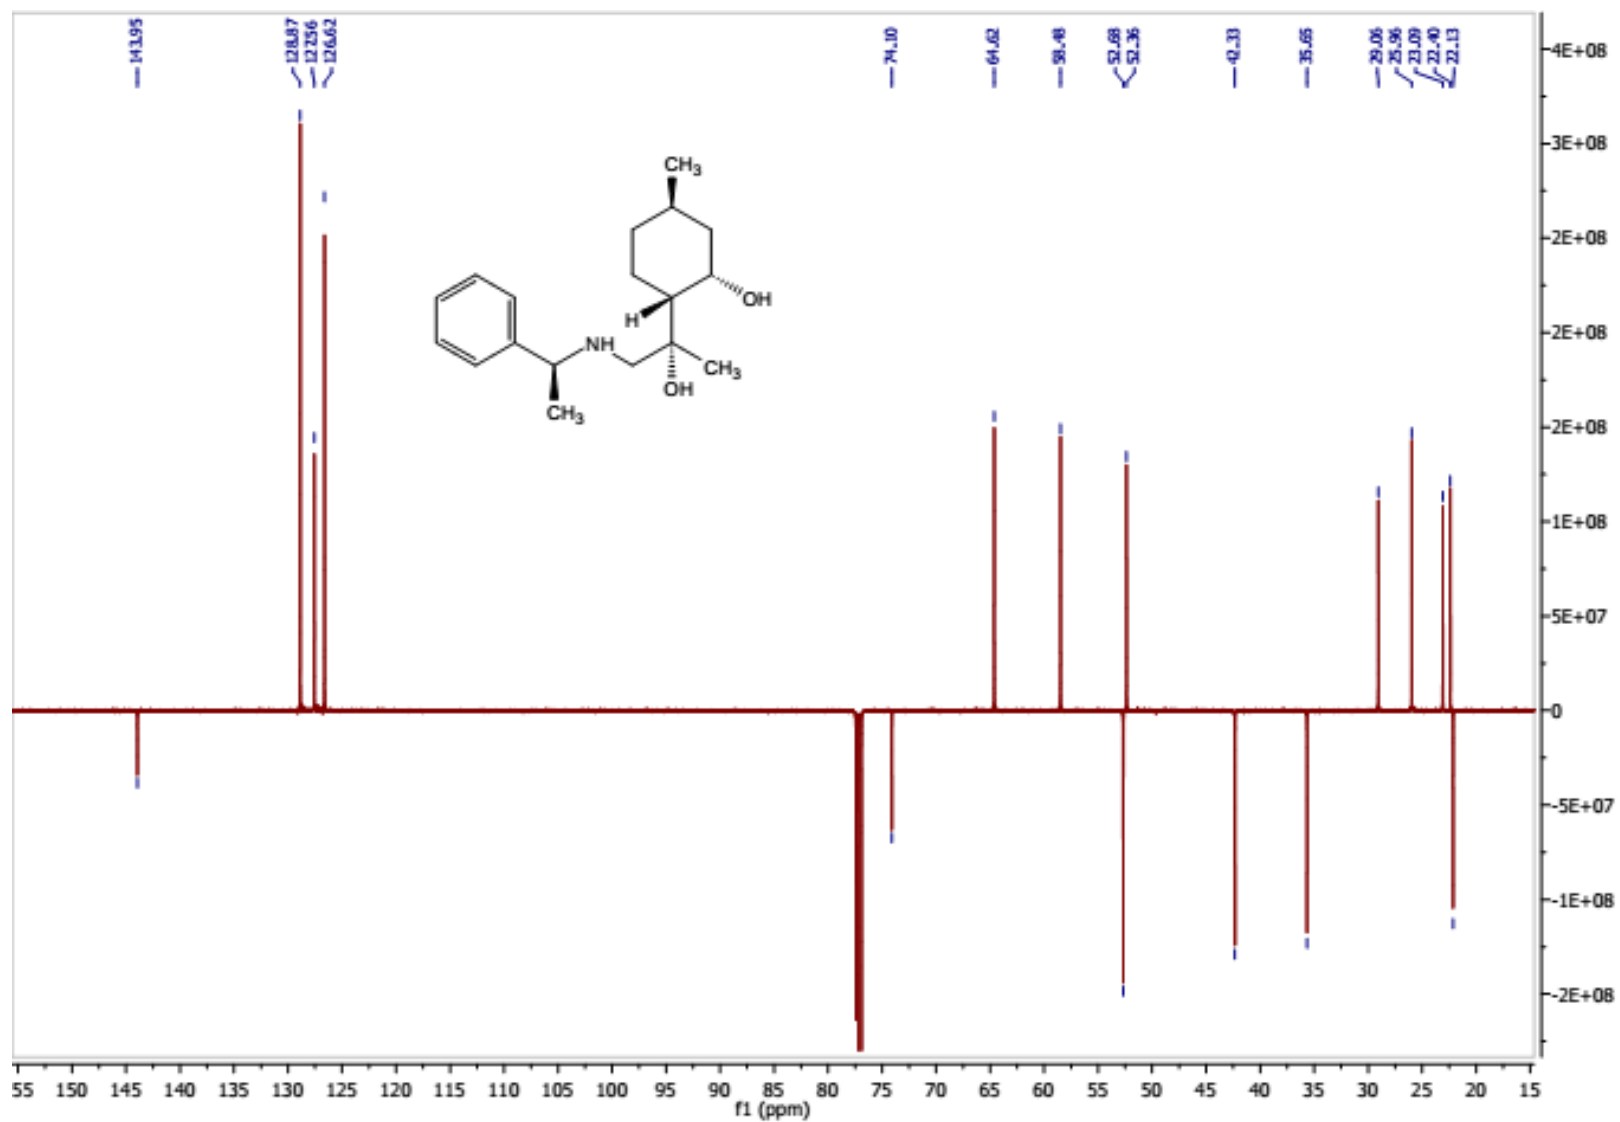

COSY of compound **22**

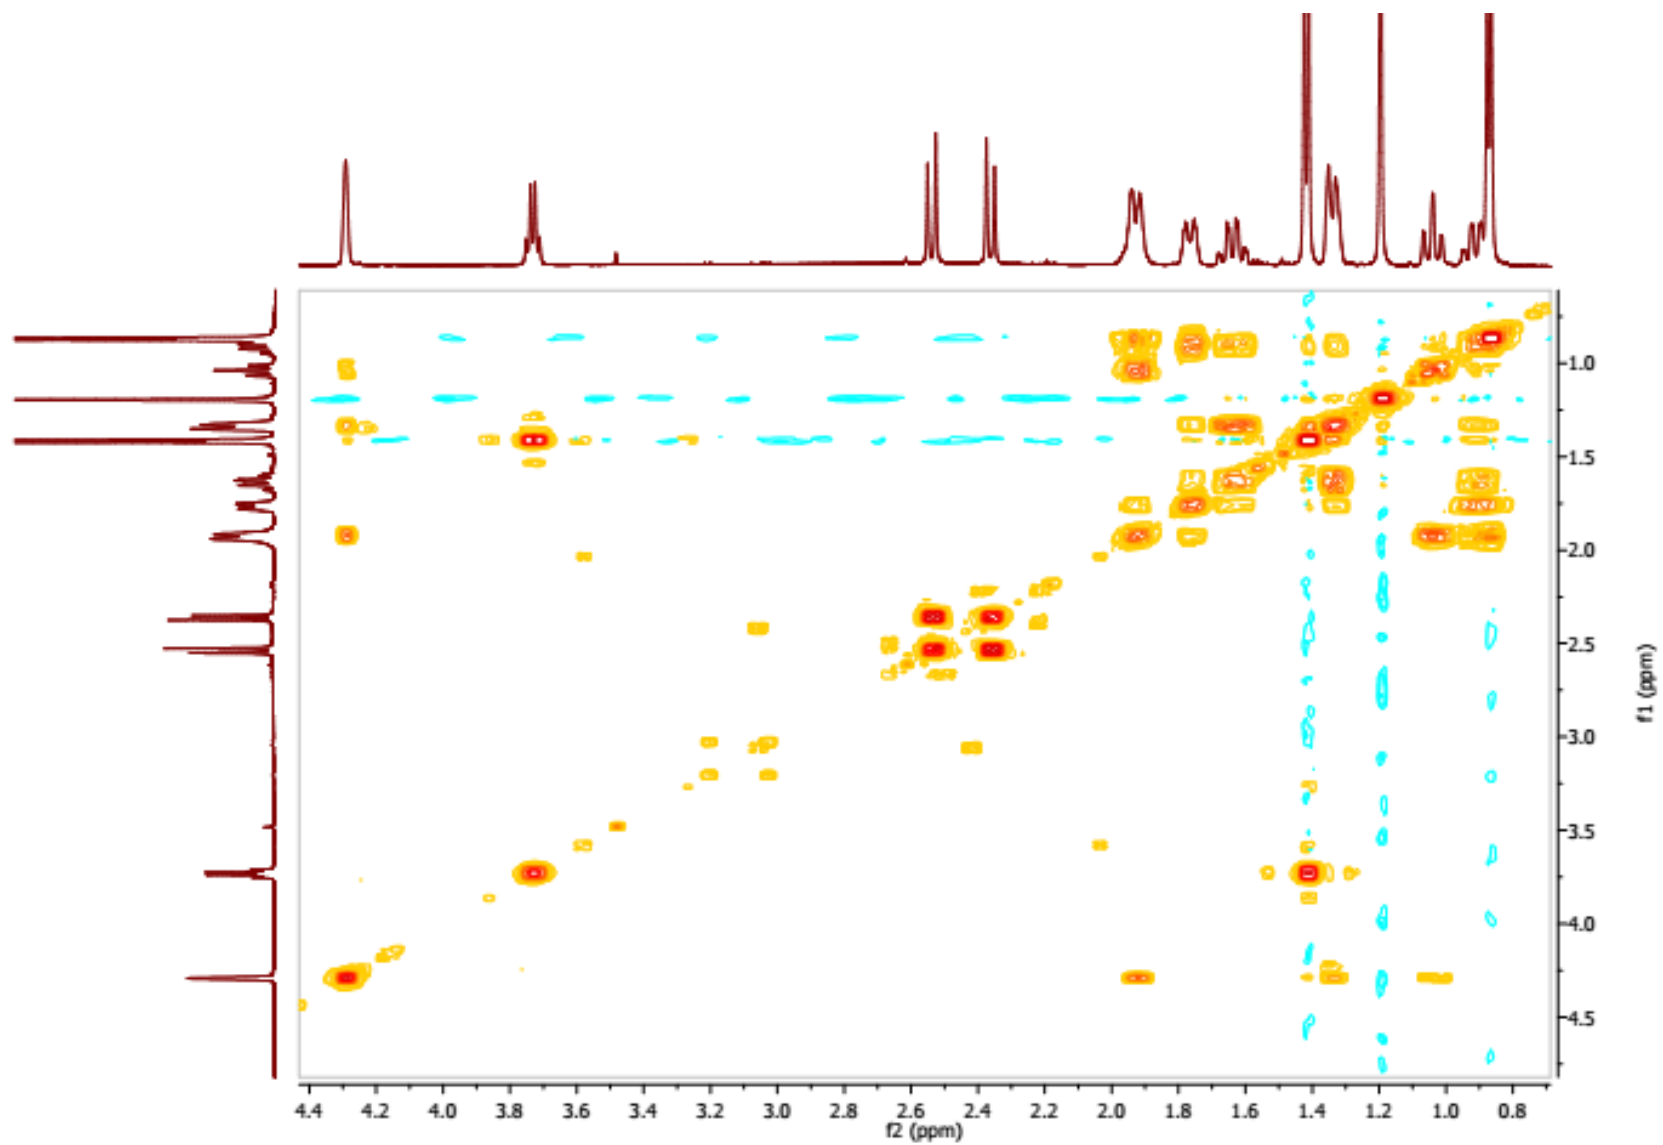



NOESY of compound **22**

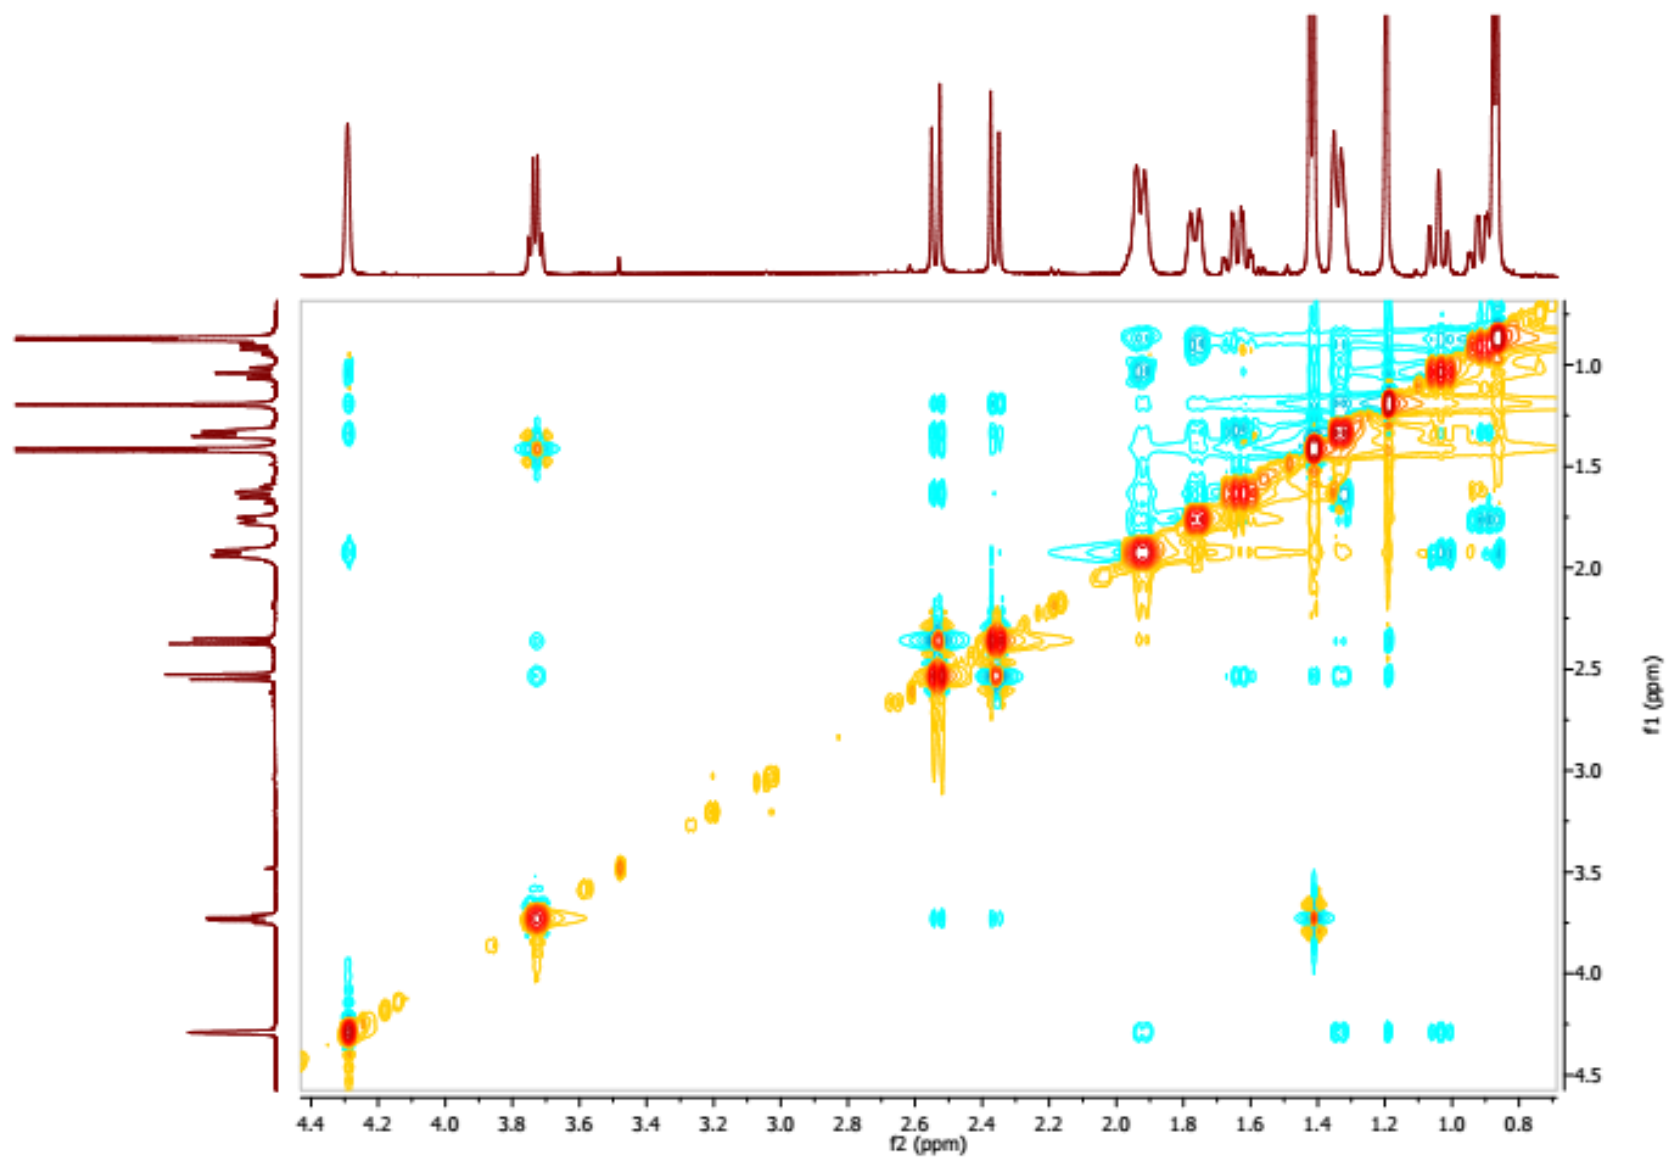

HMBC of compound 22

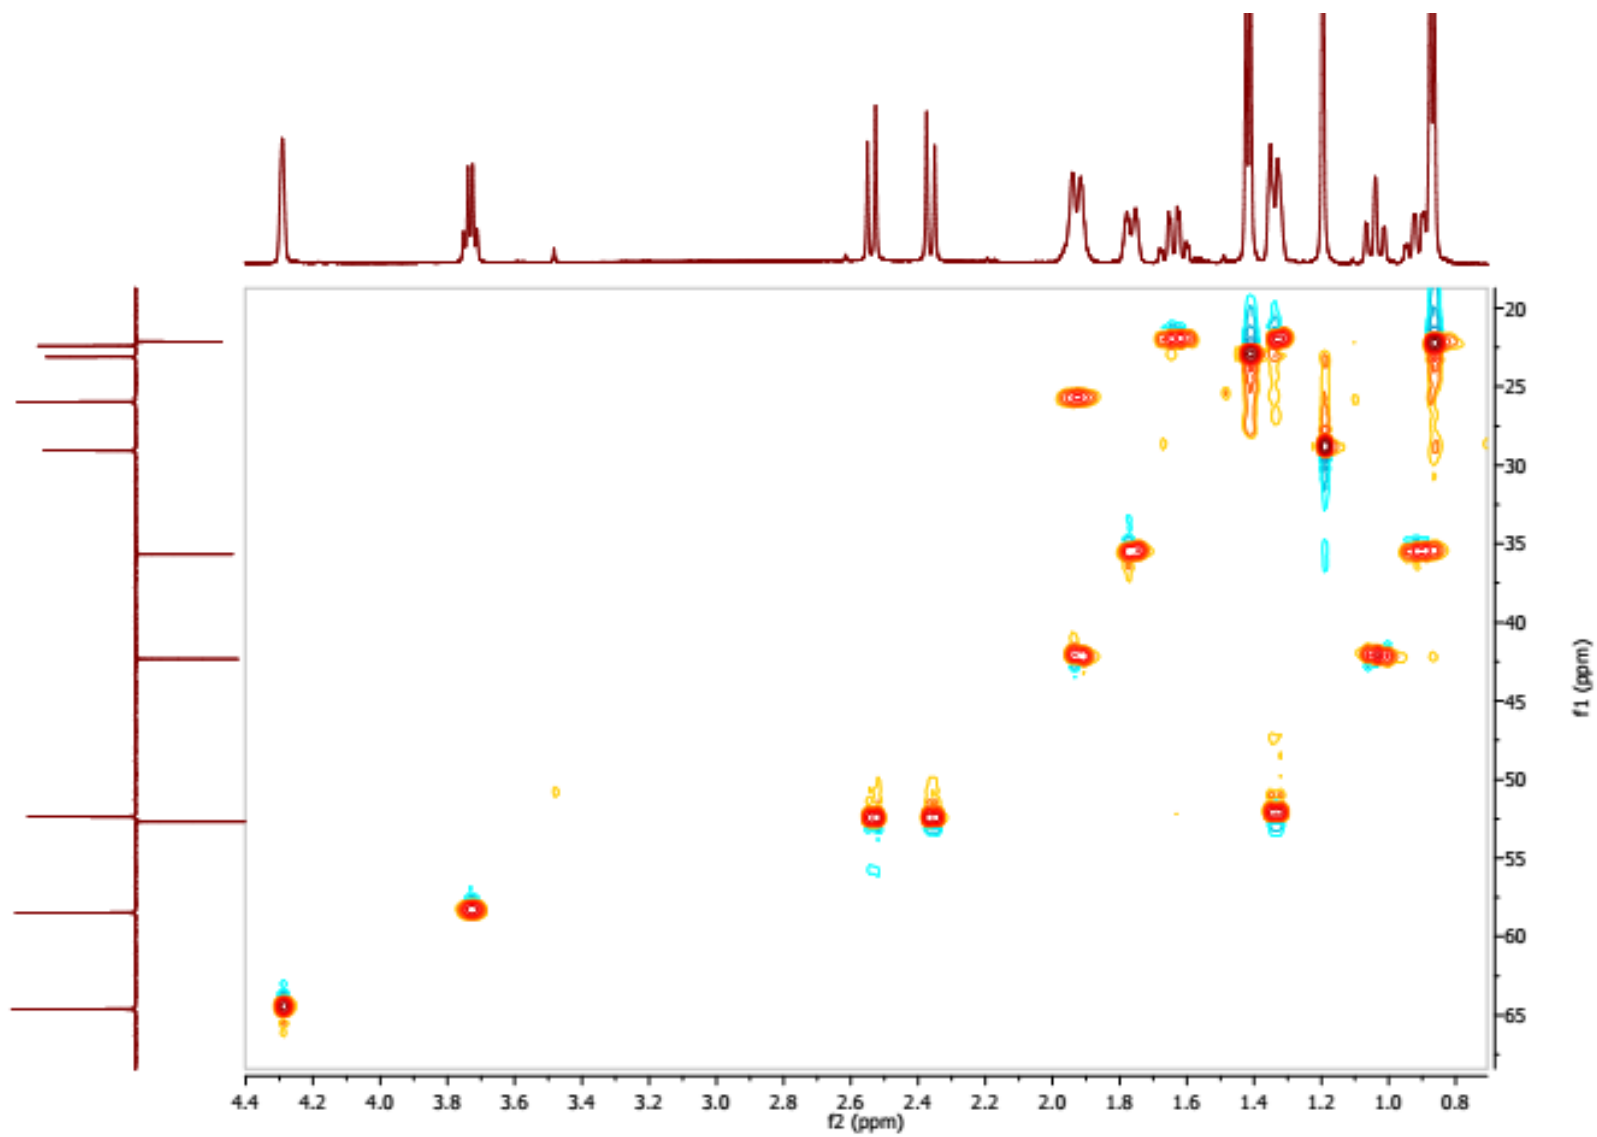

HMBC of compound 22

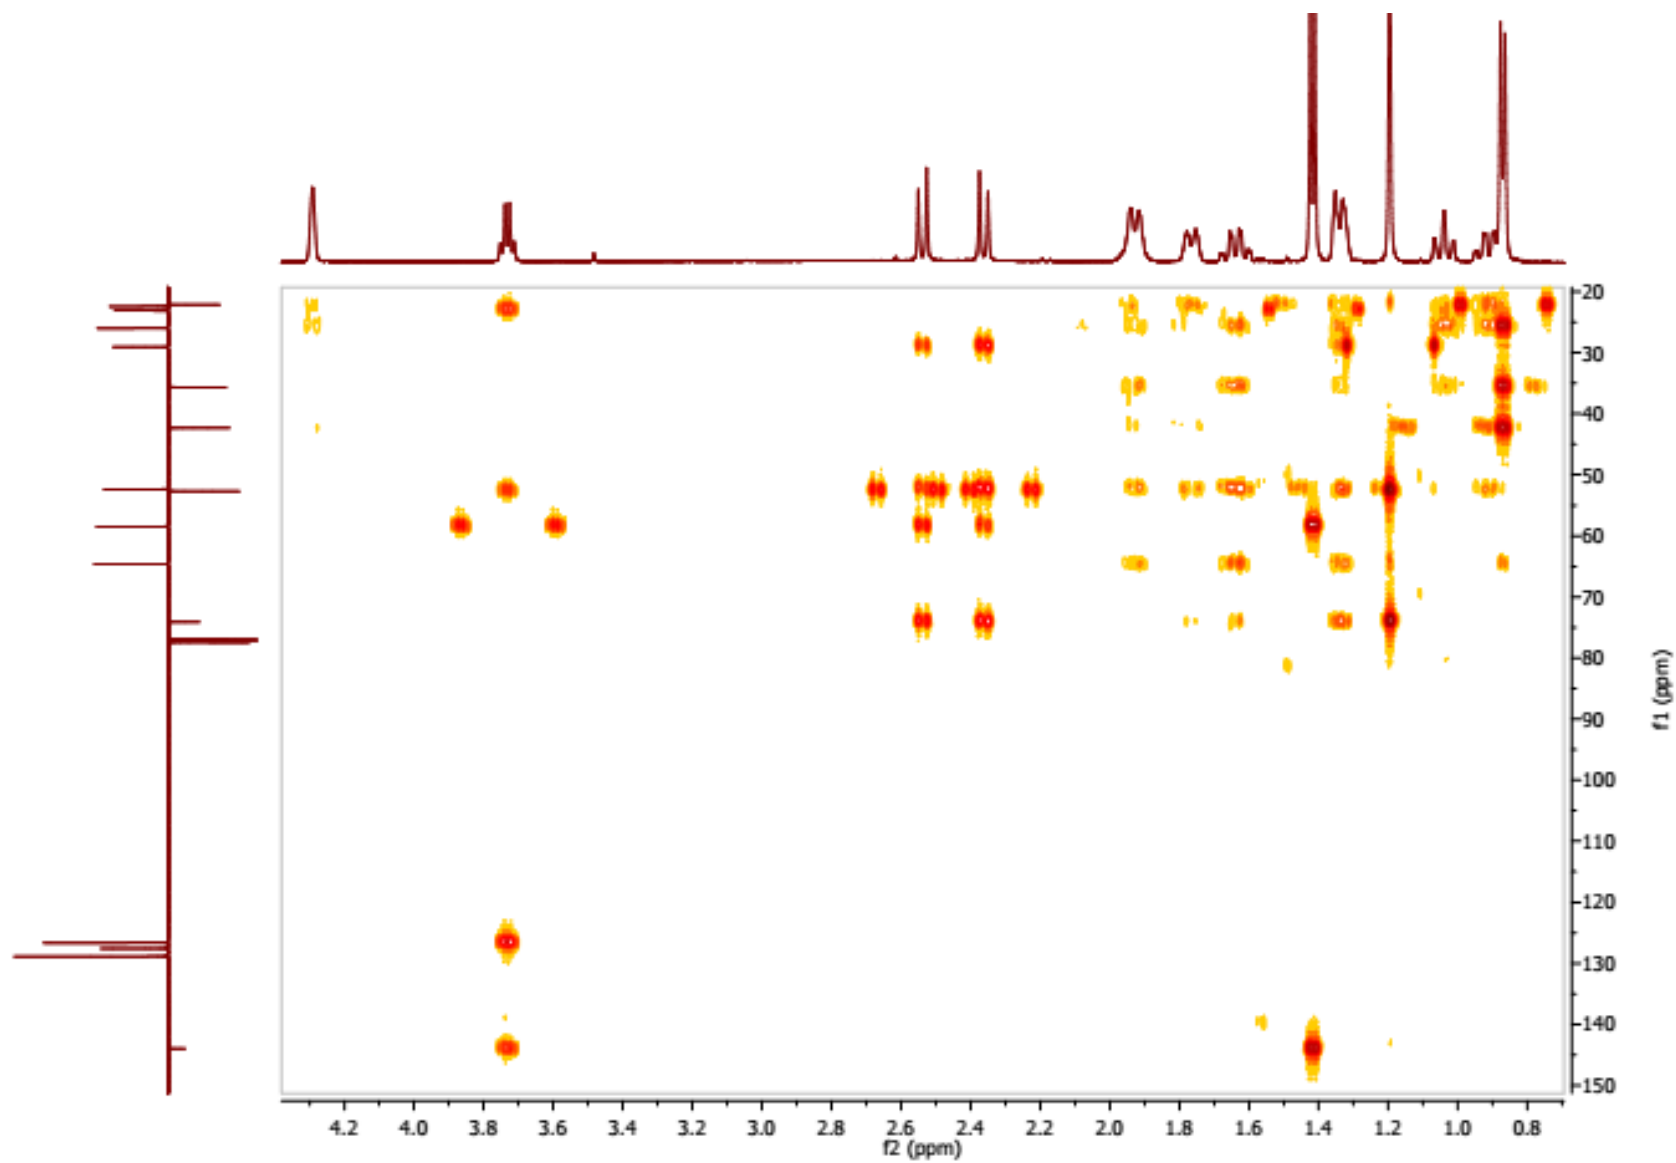

<sup>1</sup>H-NMR of compound **23**

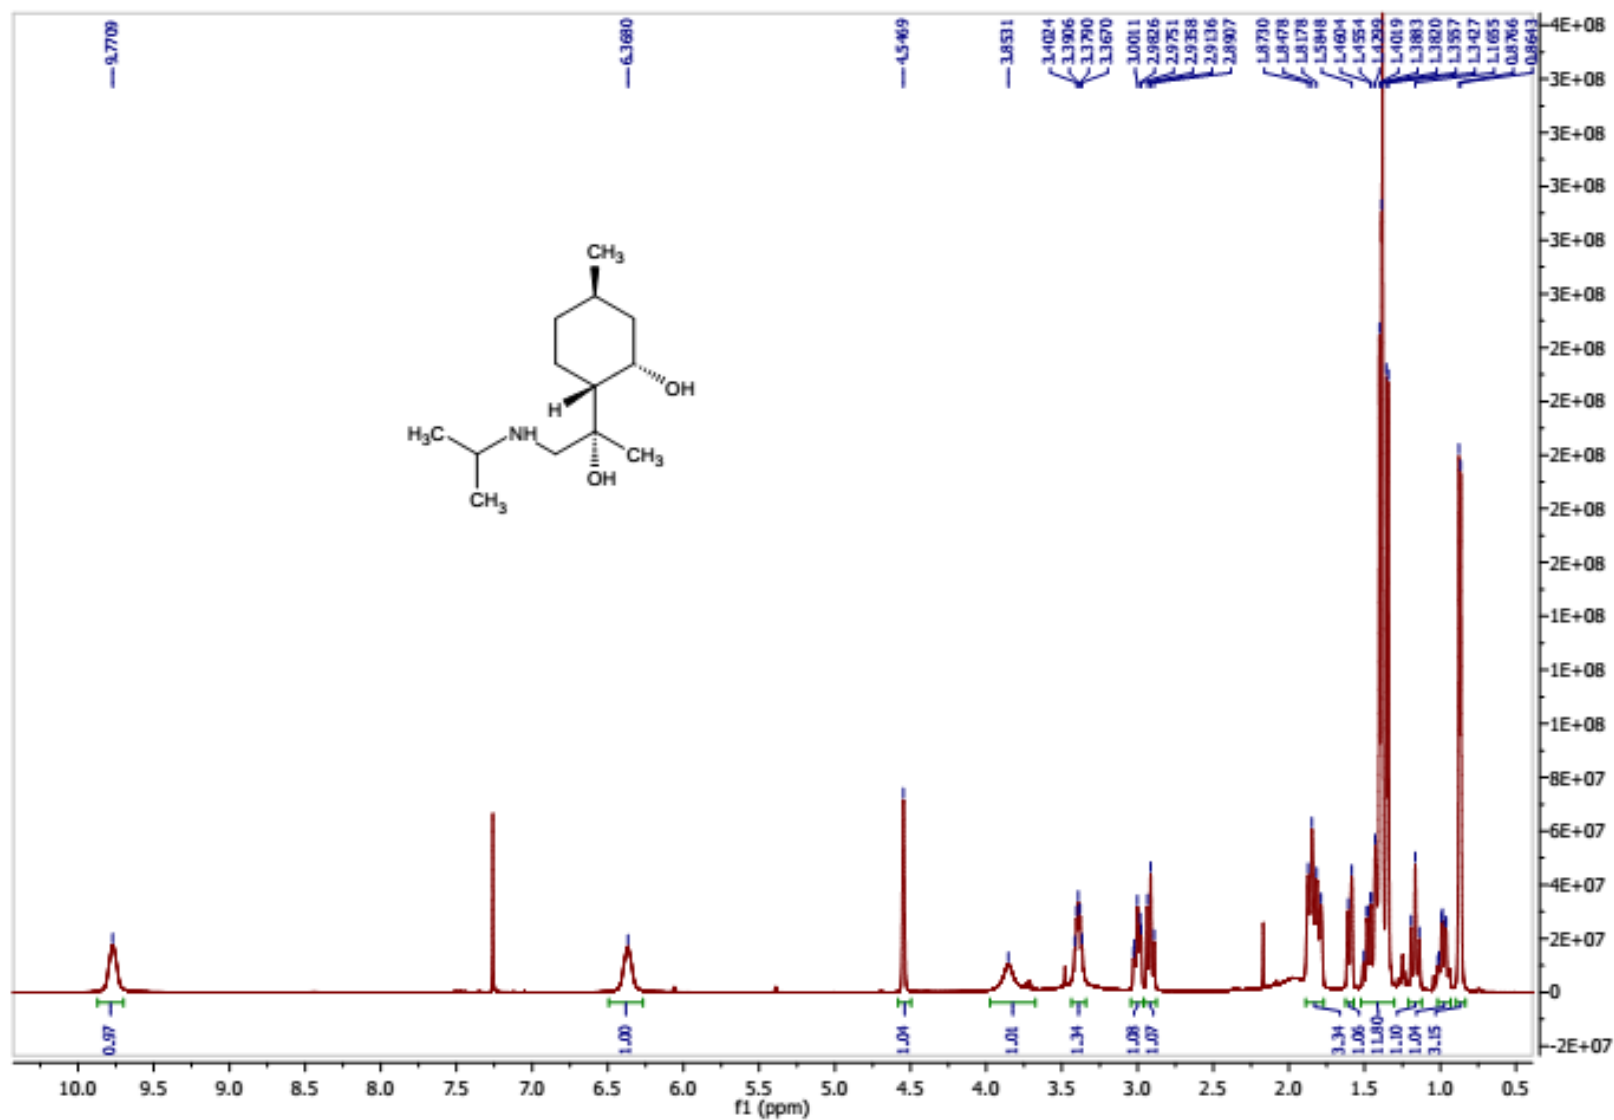

$^{13}\text{C}$ -NMR of compound **23**

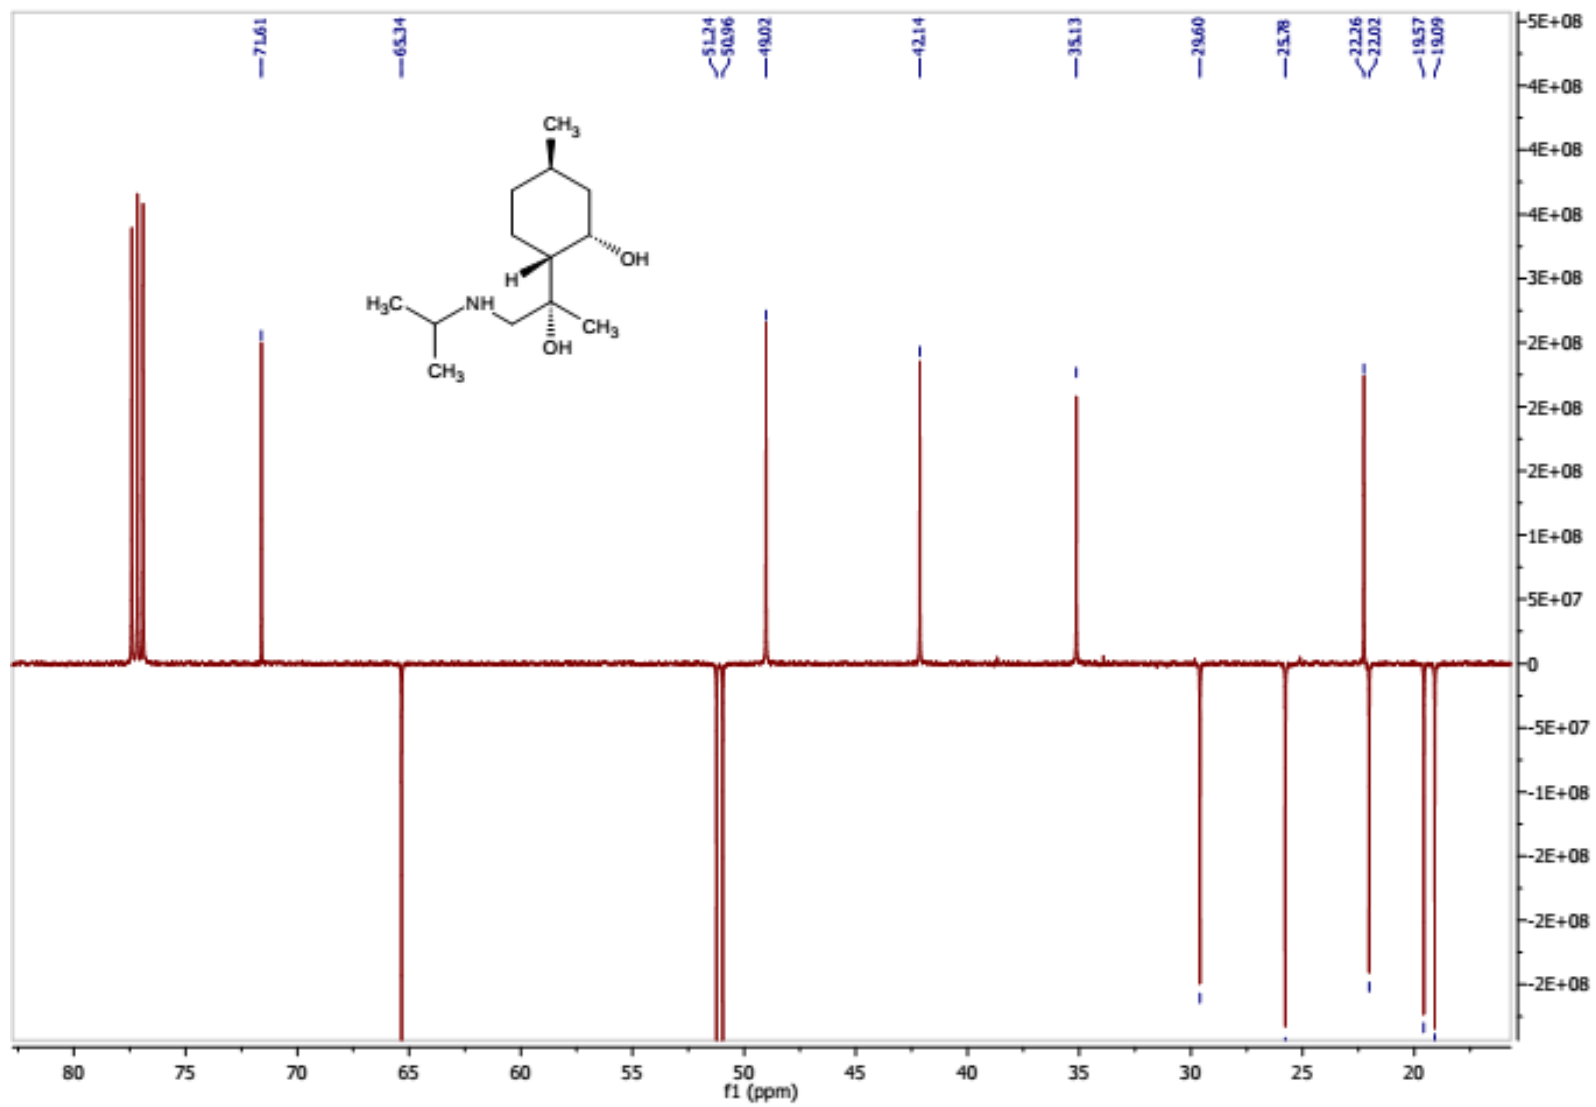

COSY of compound 23

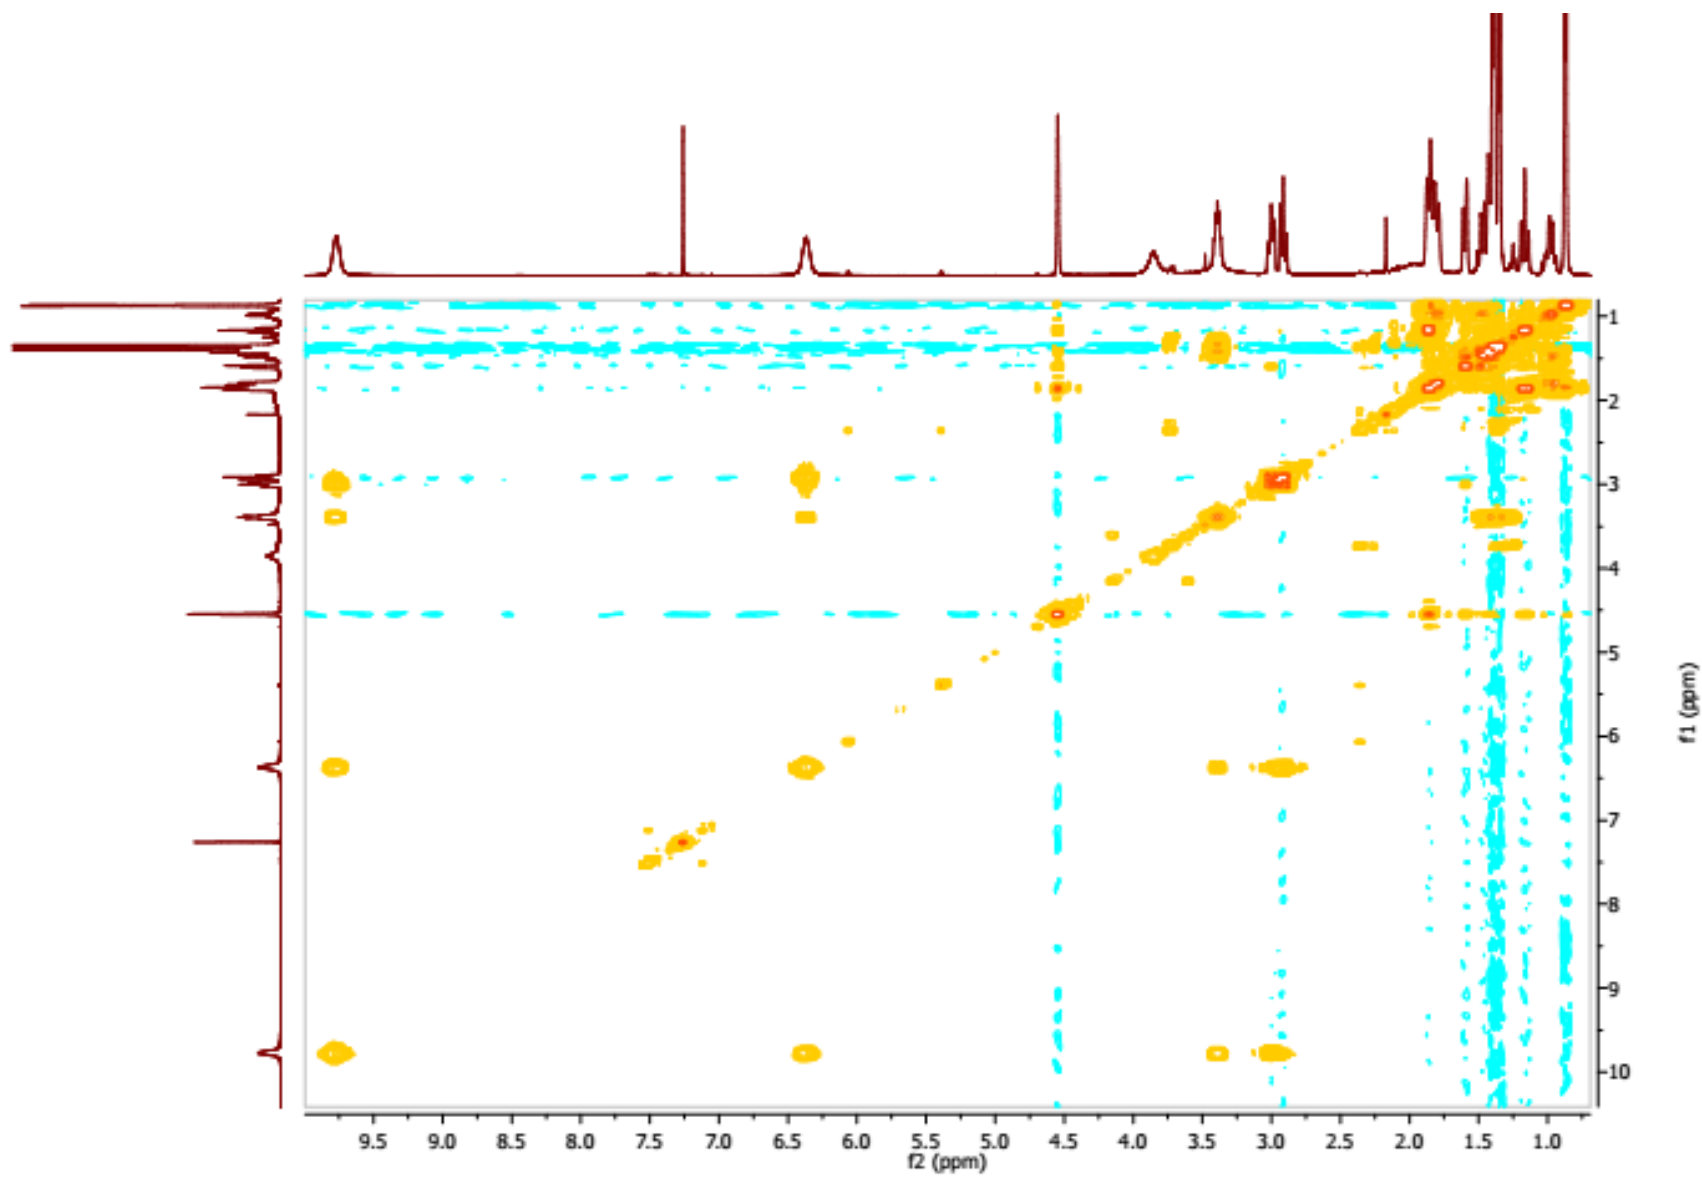

NOESY of compound 23

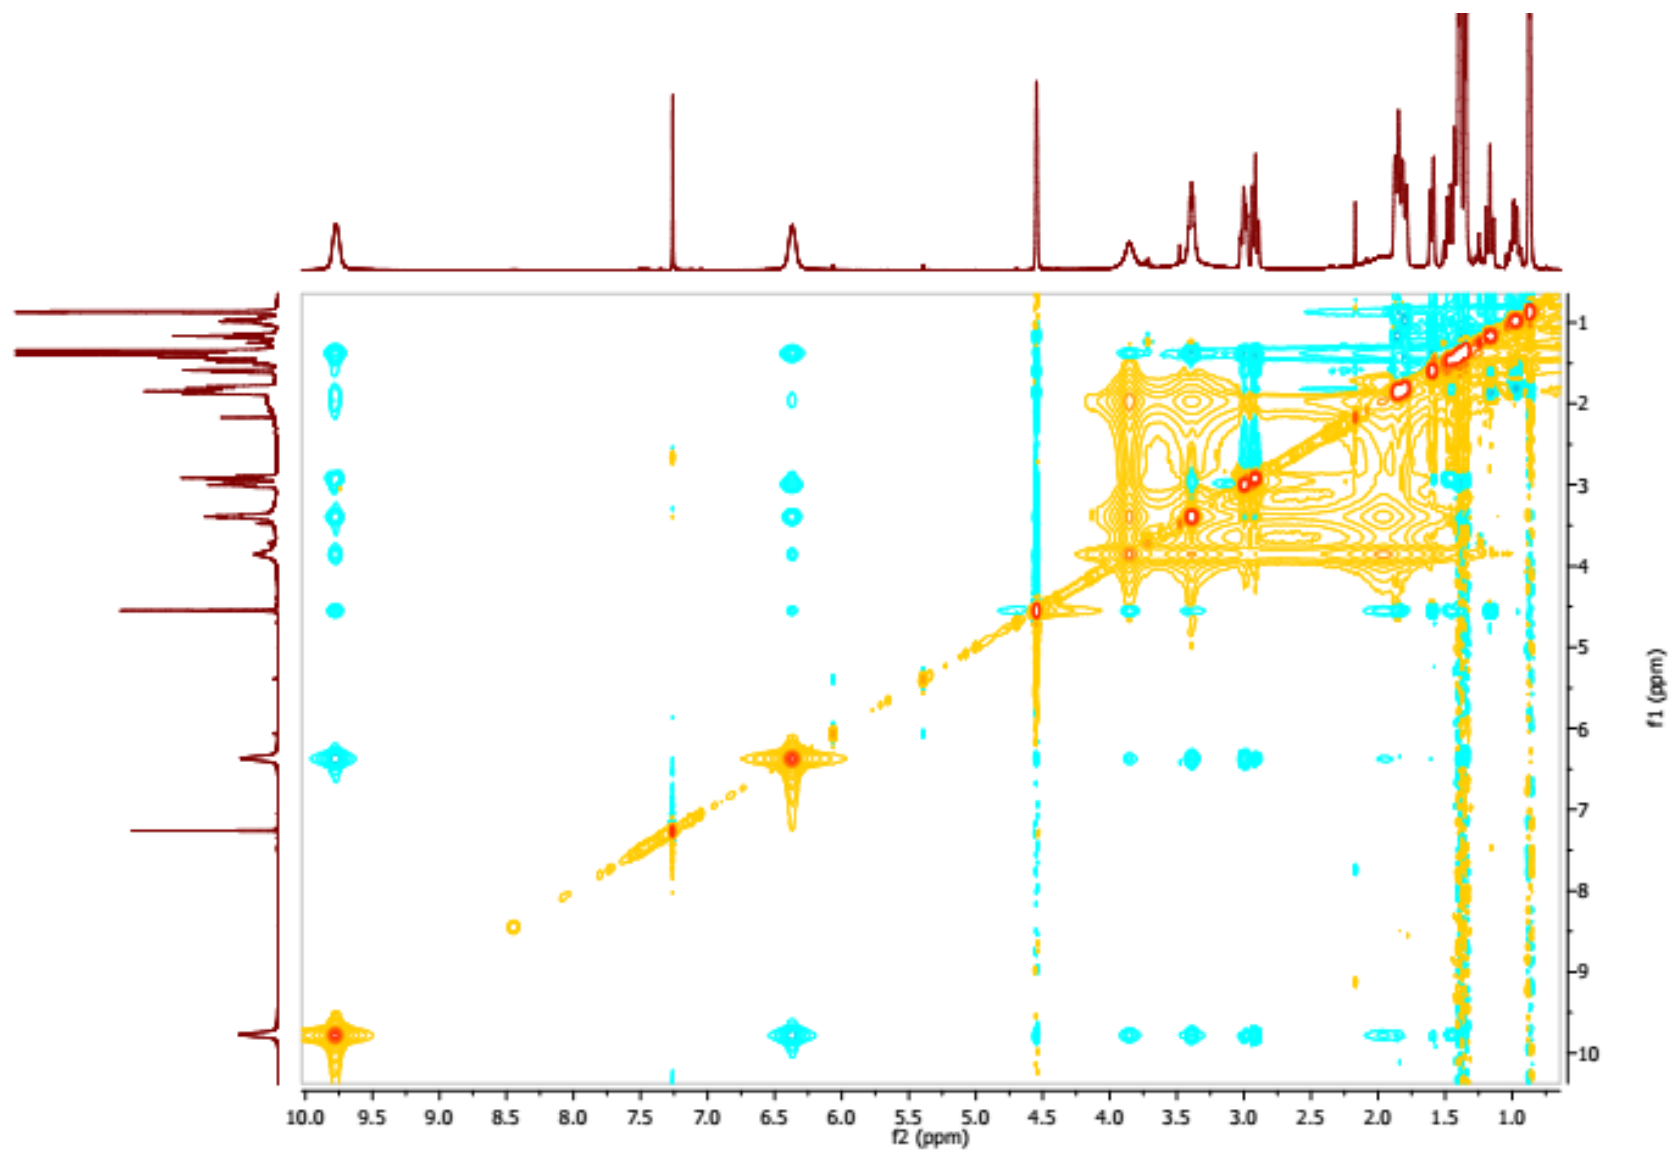

HSQC of compound **23**

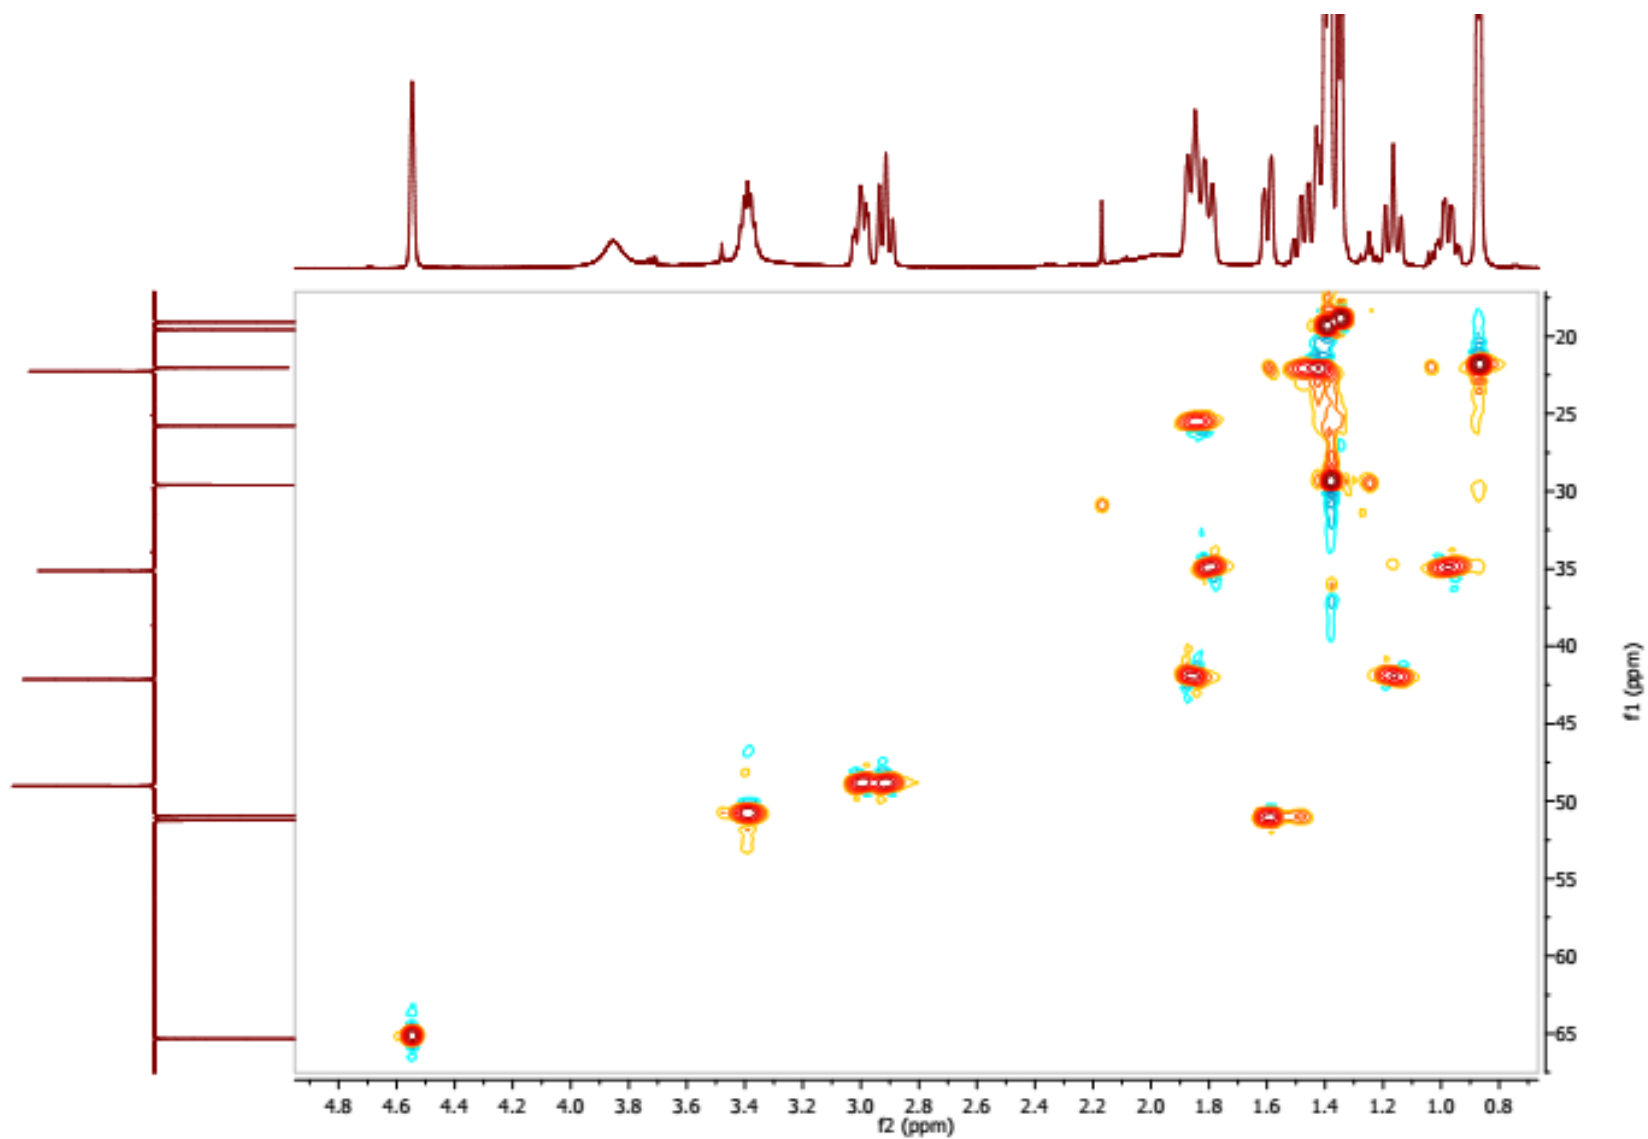





$^1\text{H-NMR}$  of compound **24**

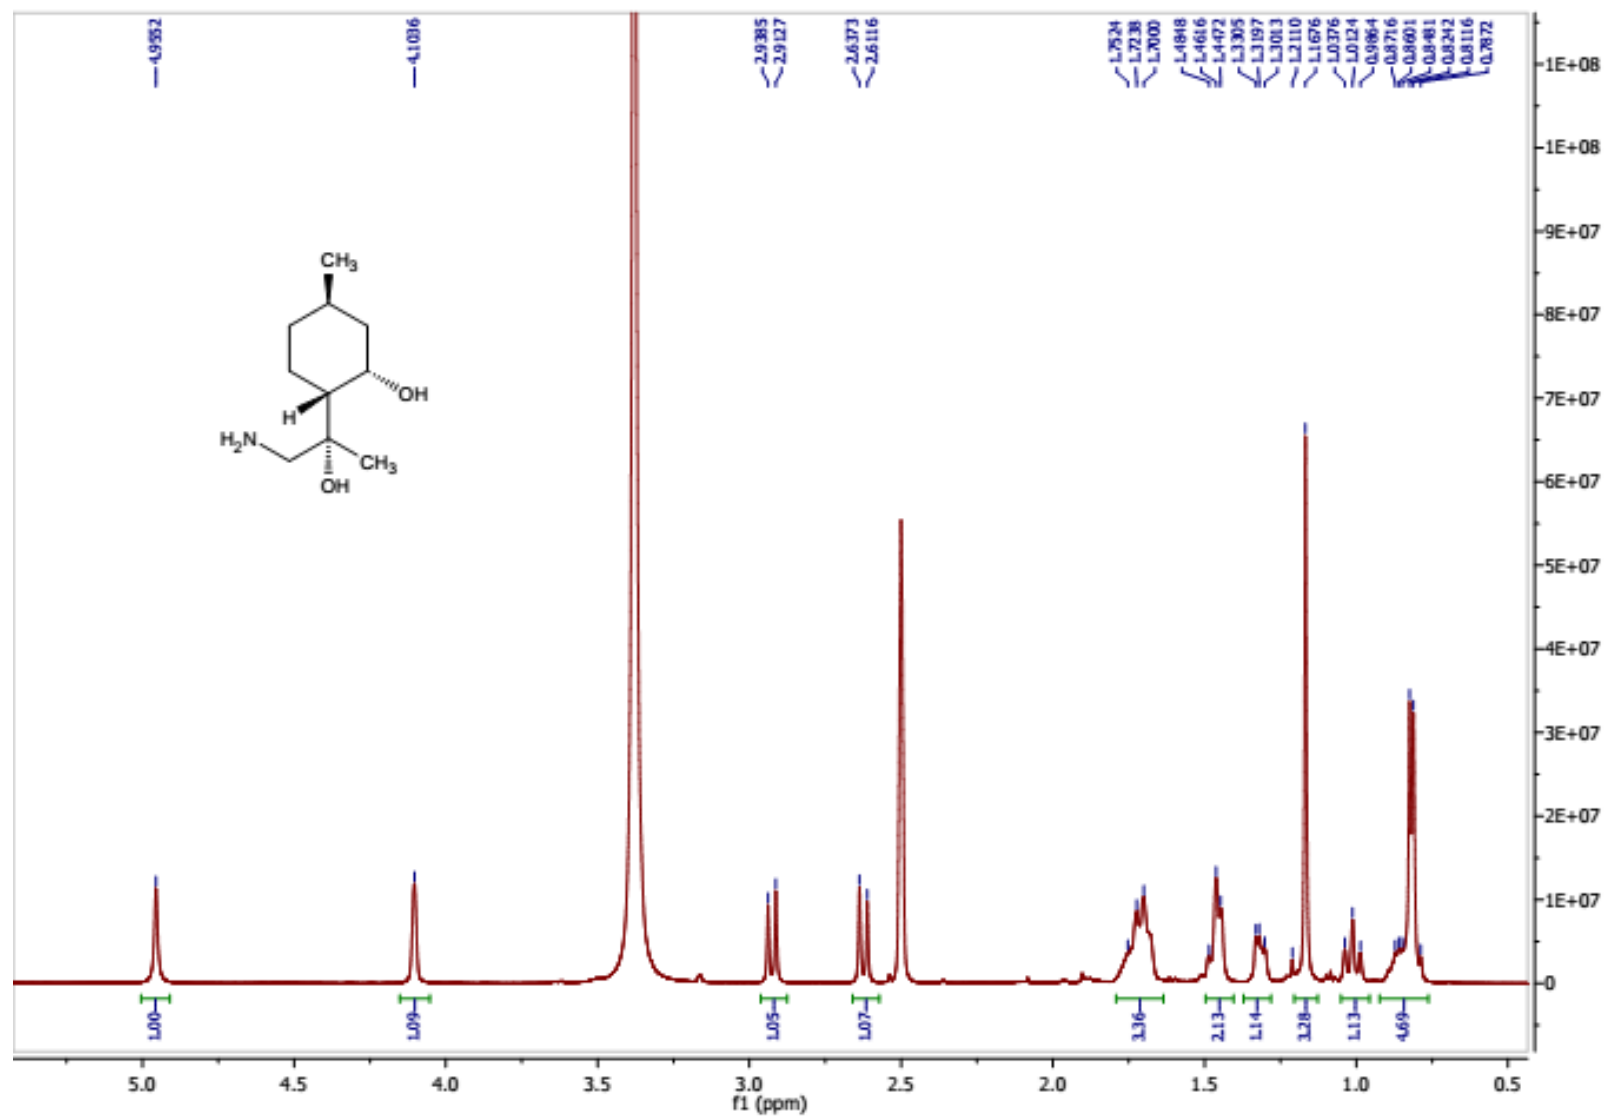

$^{13}\text{C}$ -NMR of compound 24

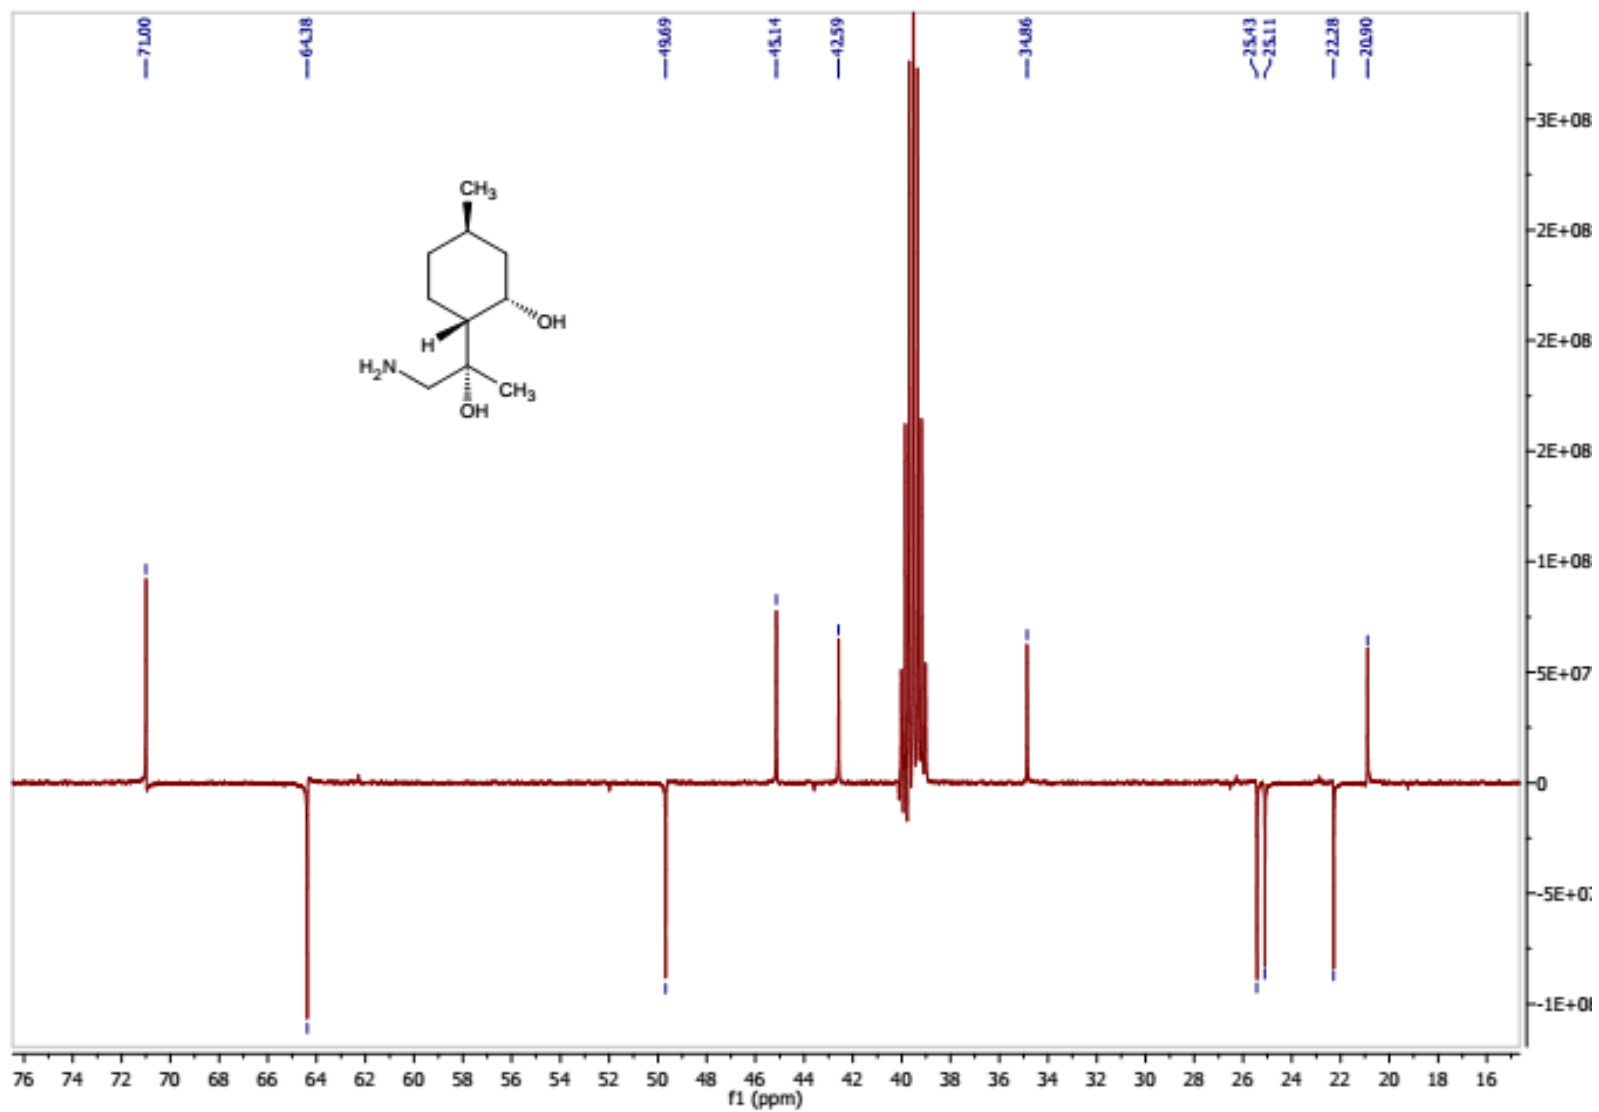

<sup>1</sup>H-NMR of compound 25

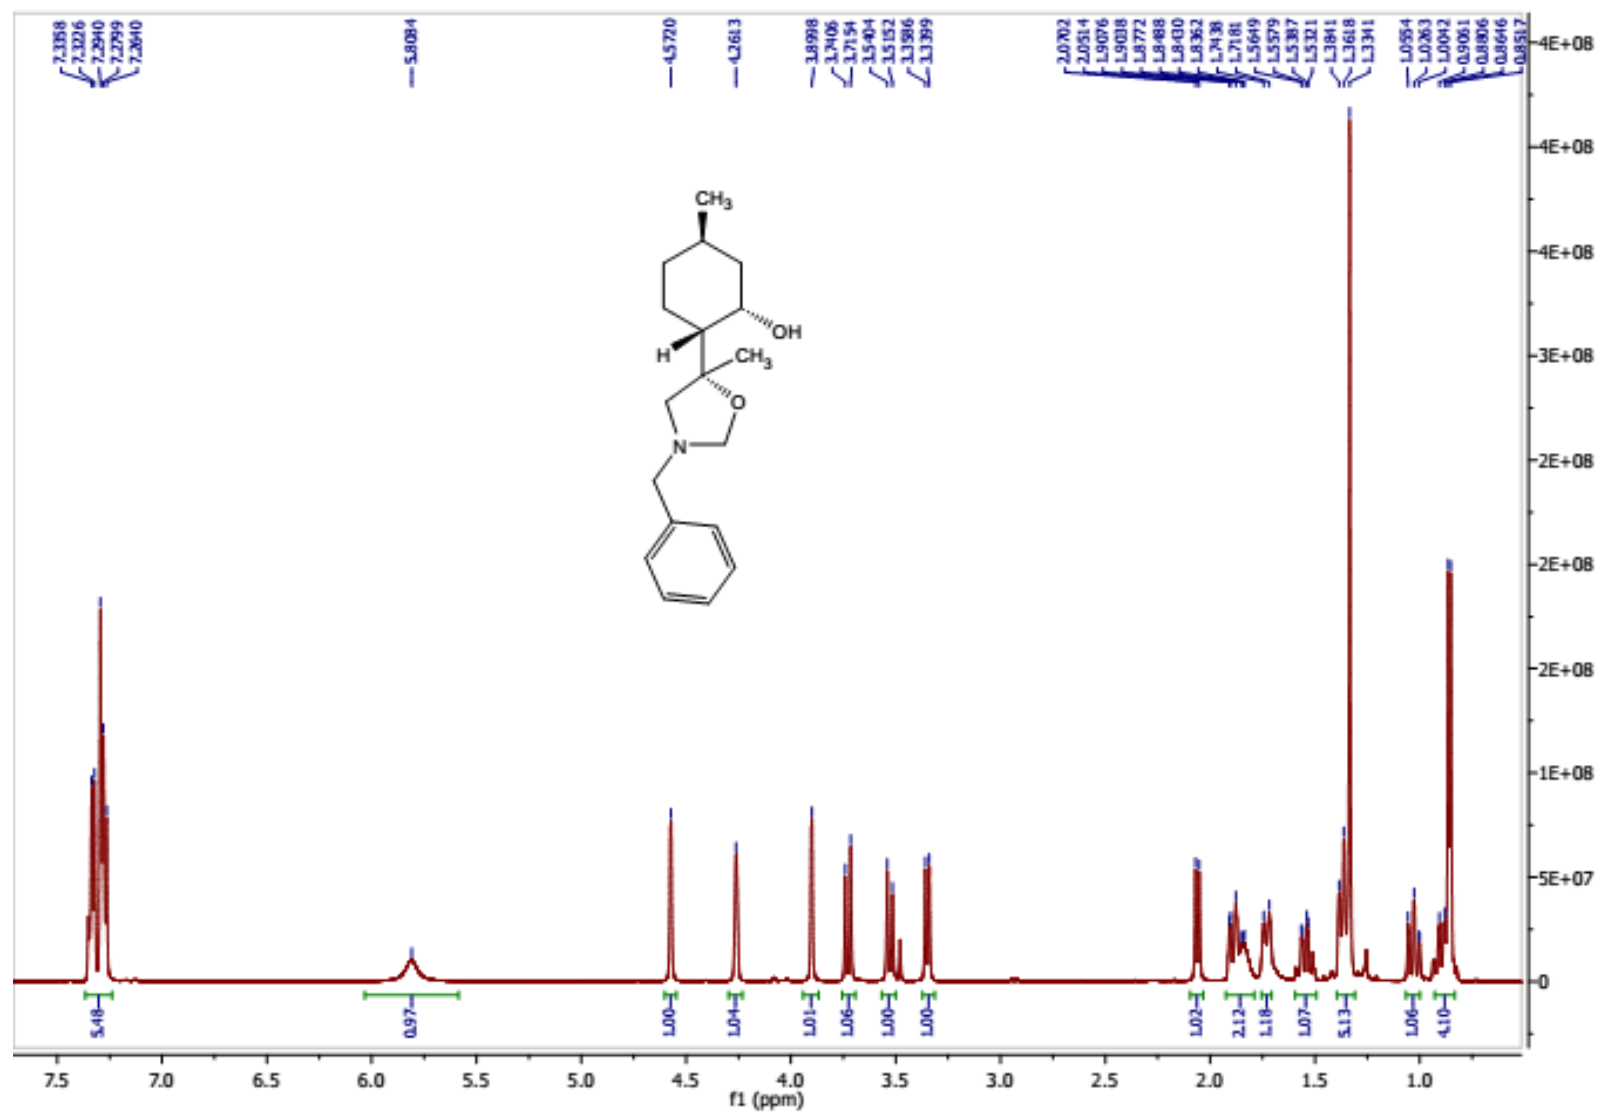

$^{13}\text{C}$ -NMR of compound **25**

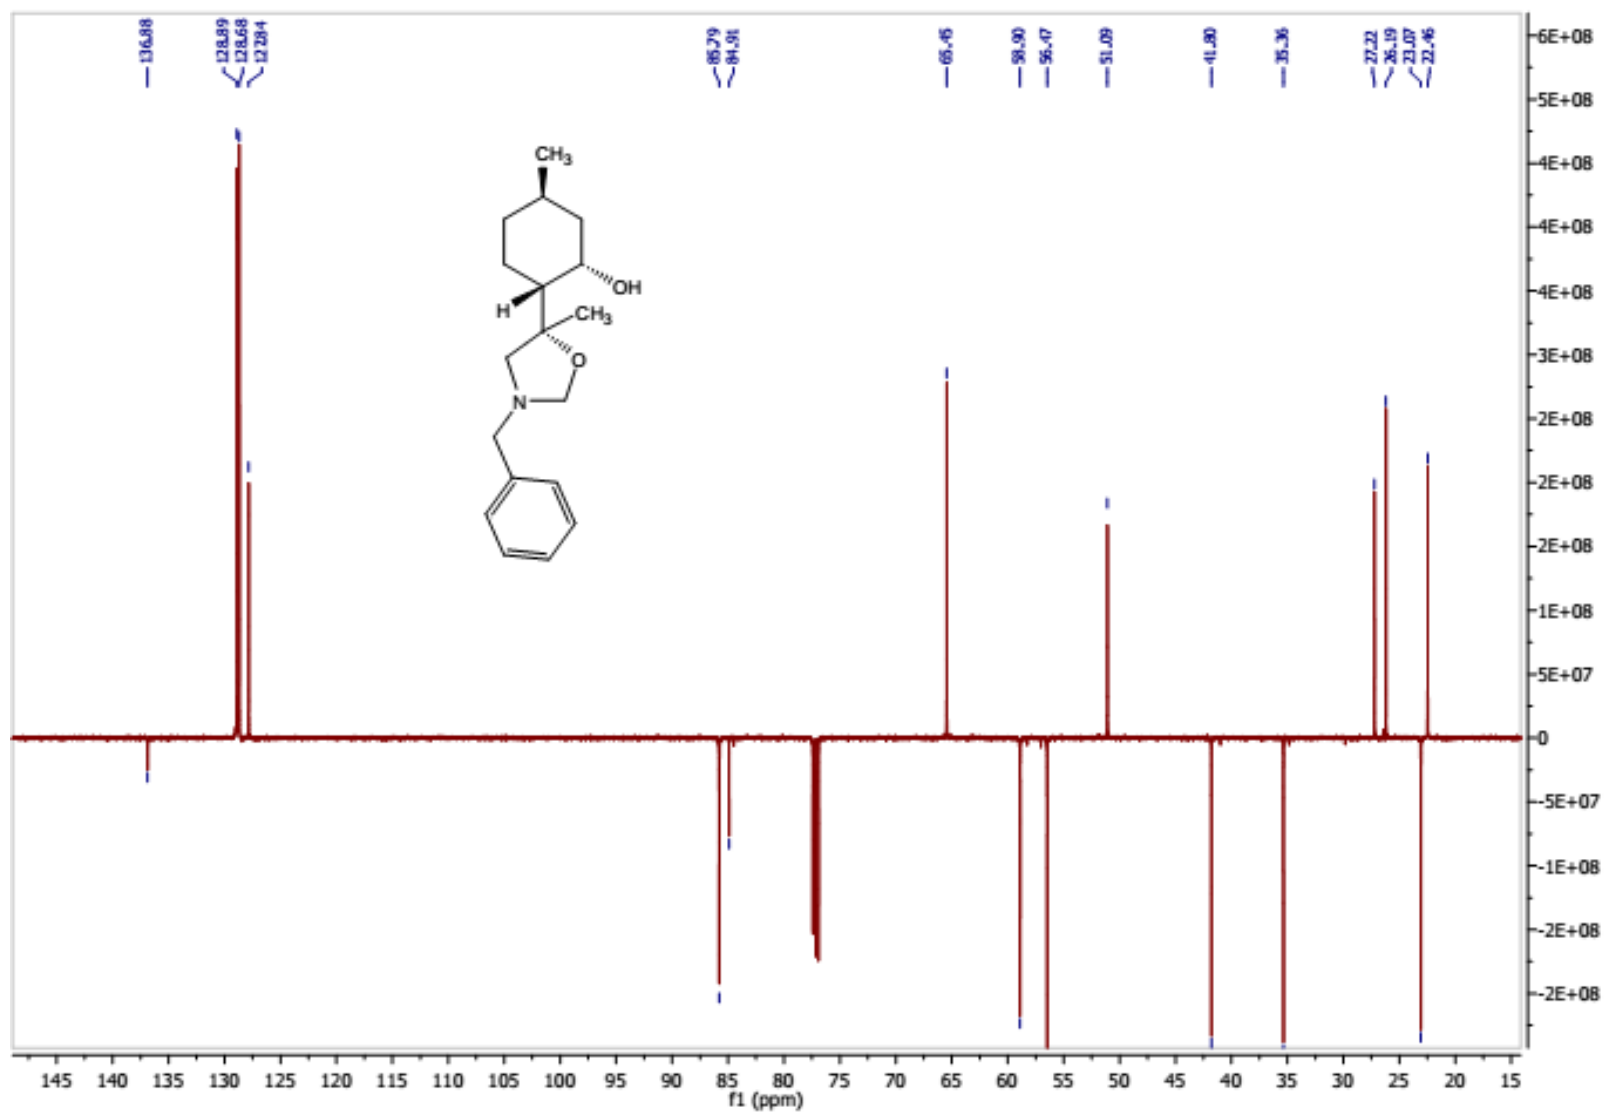

HSQC of compound 25

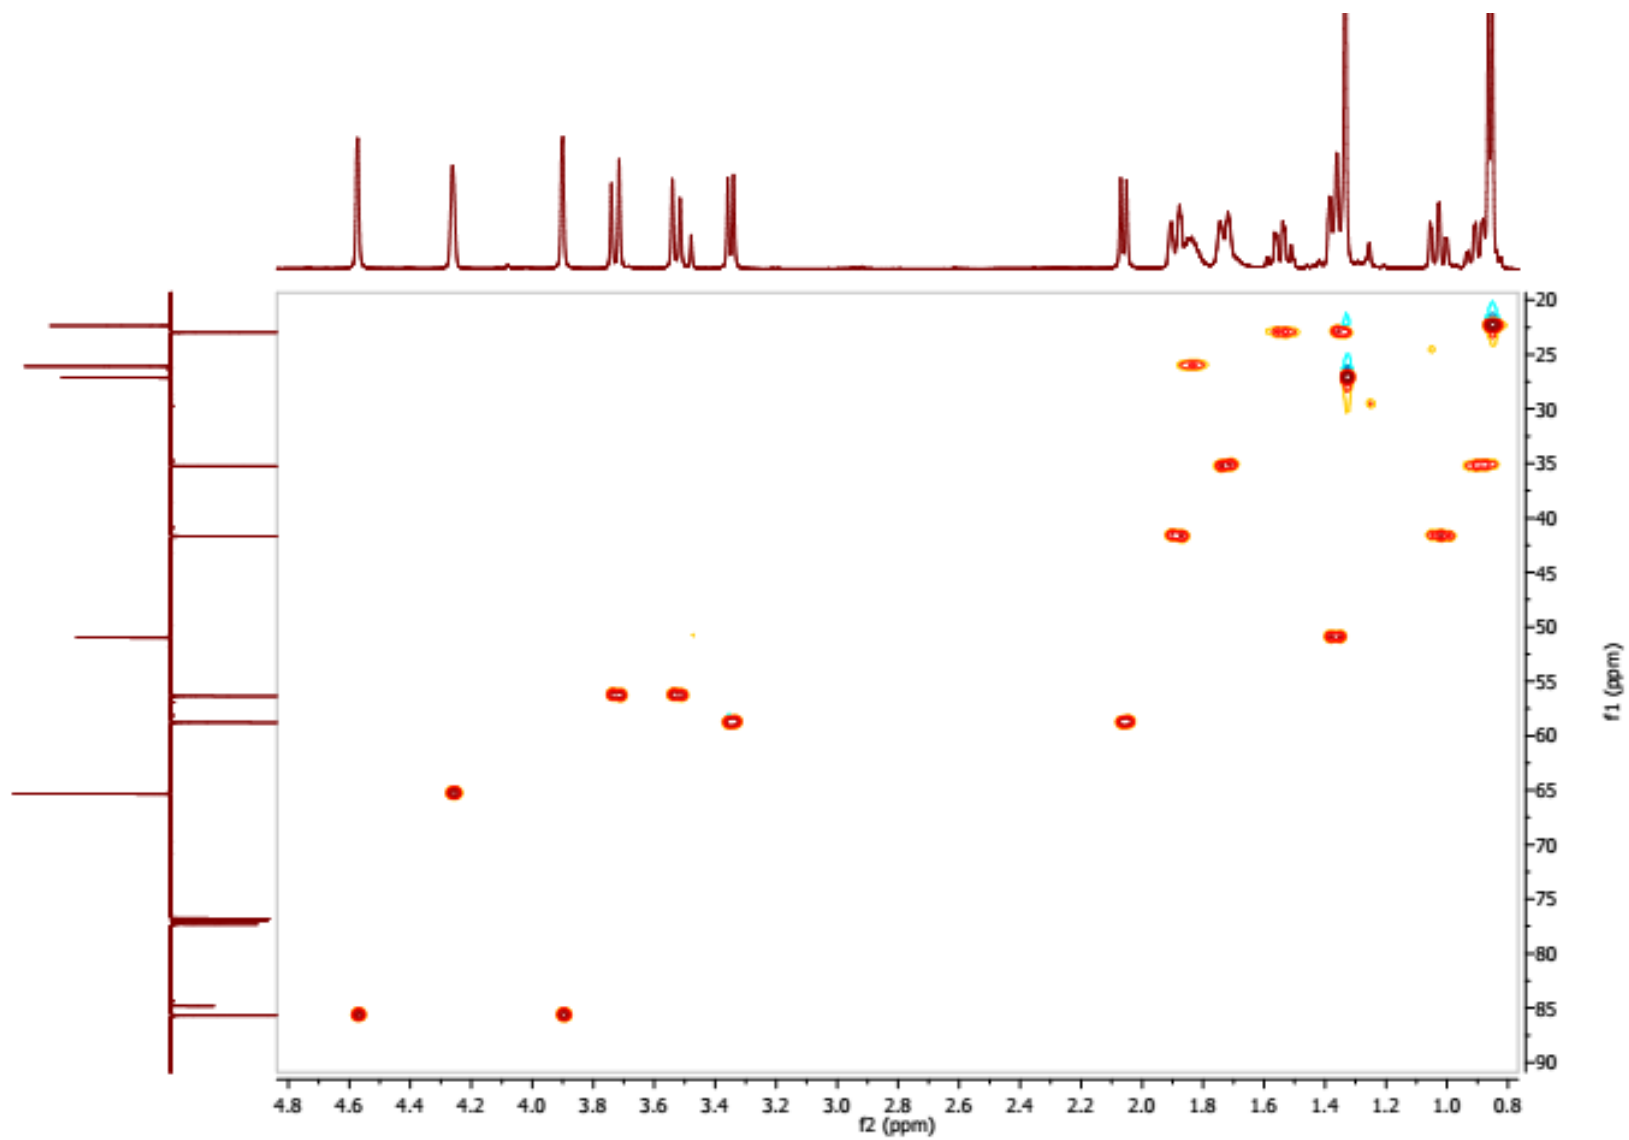

HMBC of compound 25

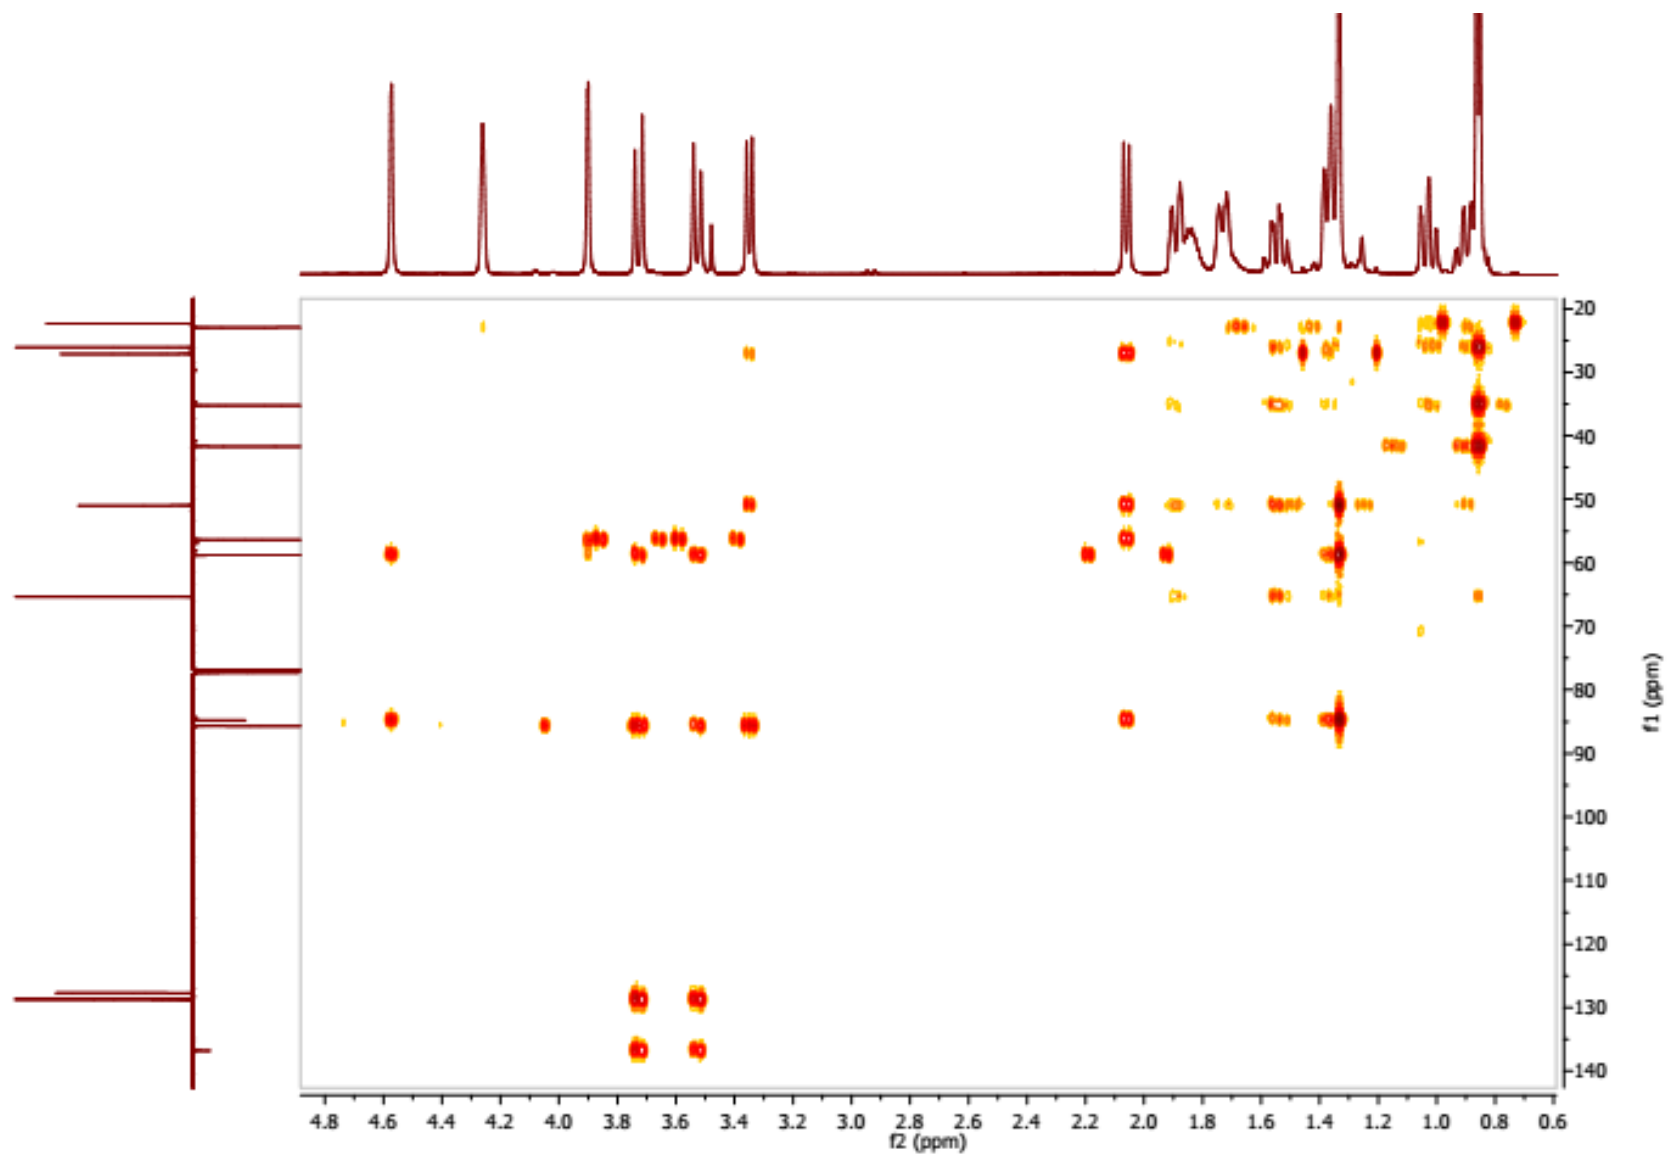

<sup>1</sup>H-NMR of compound 26

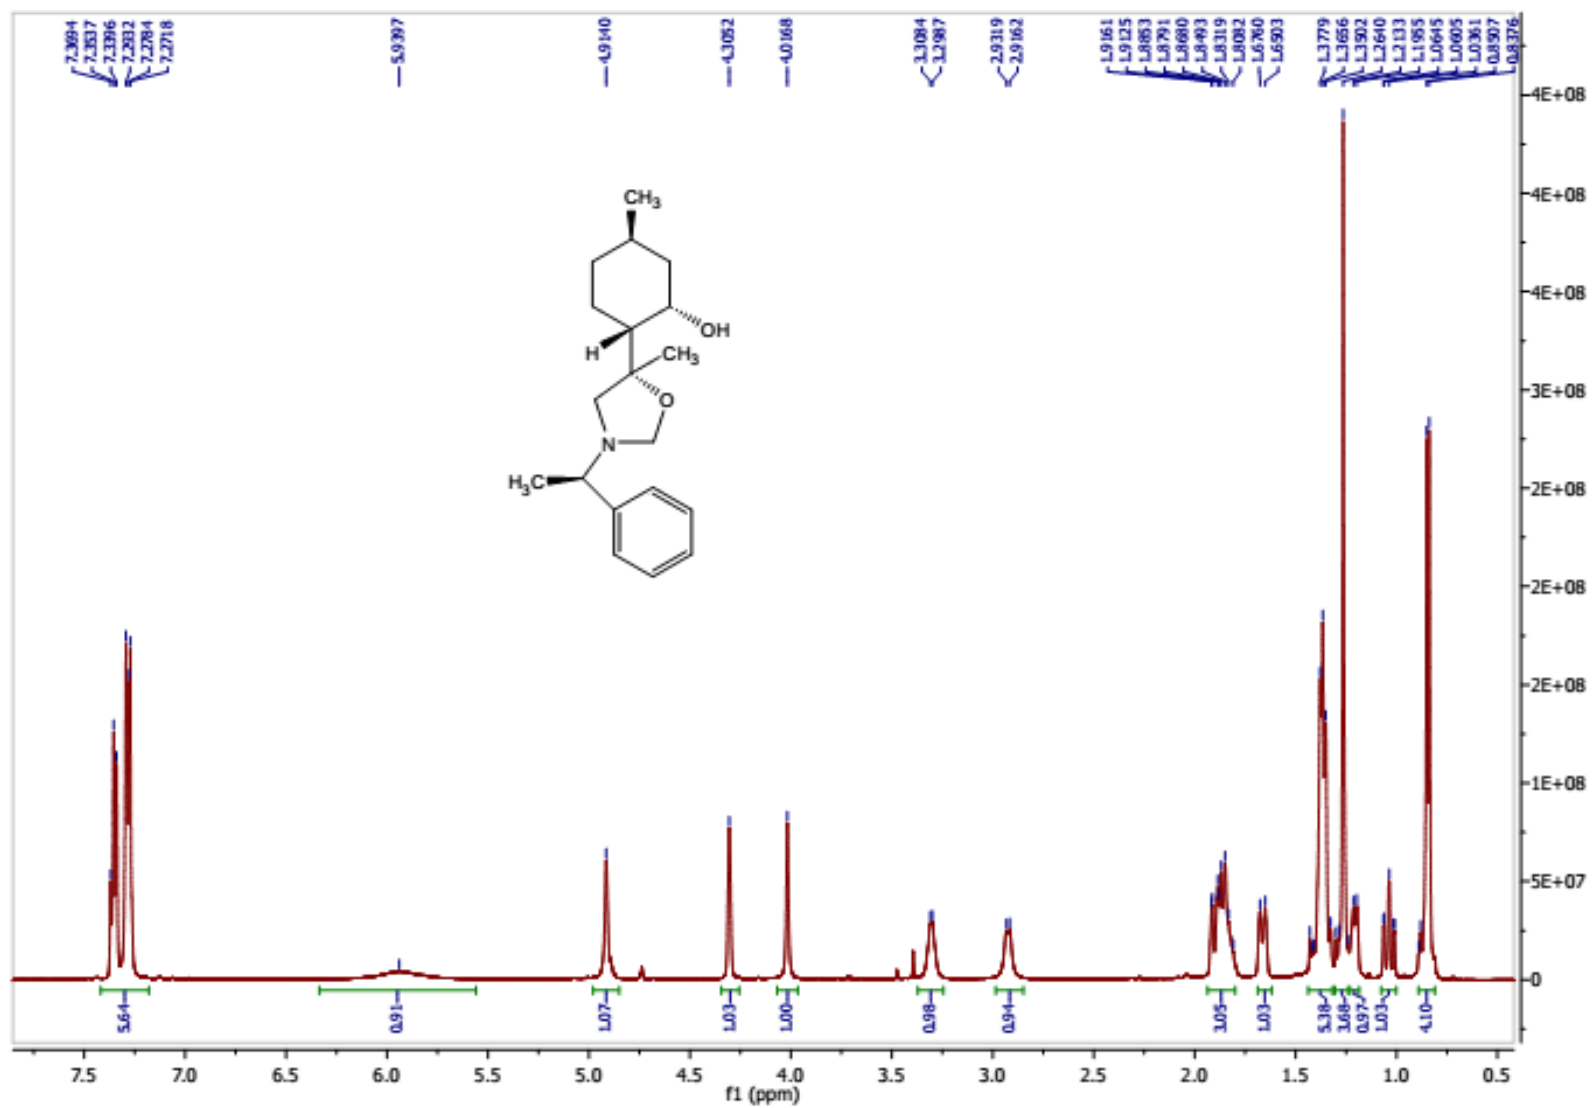



$^{13}\text{C}$ -NMR of compound **26**

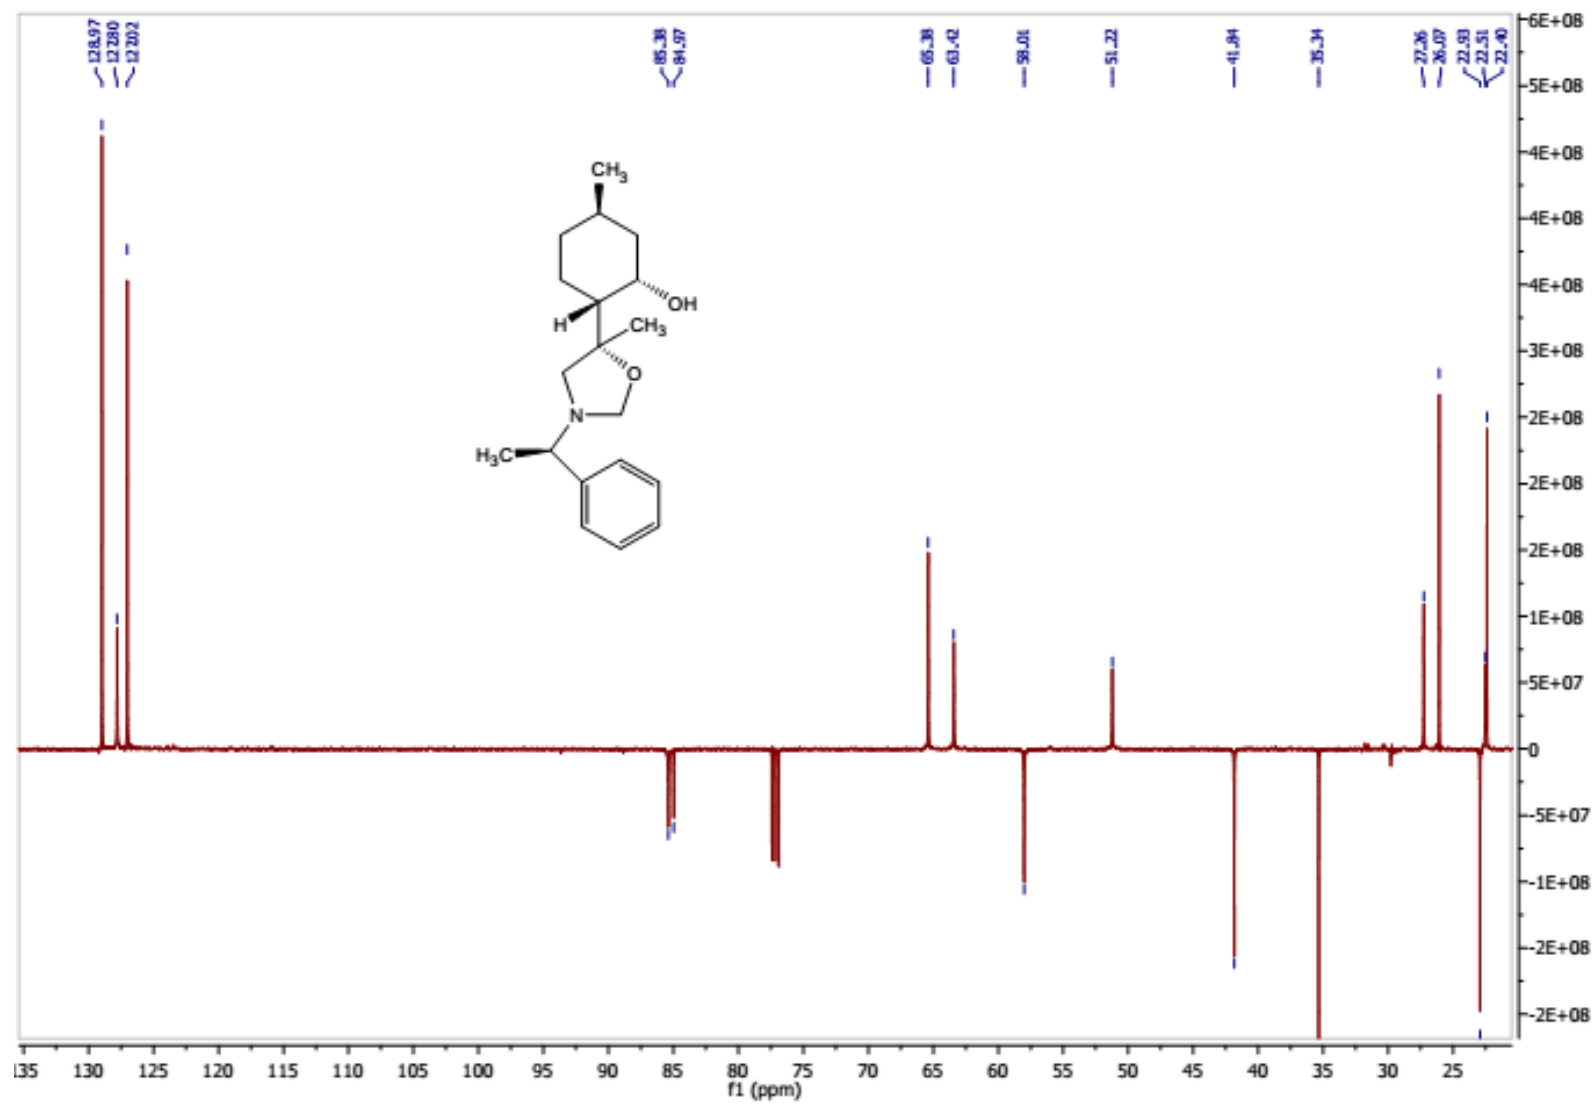

HSQC of compound **26**

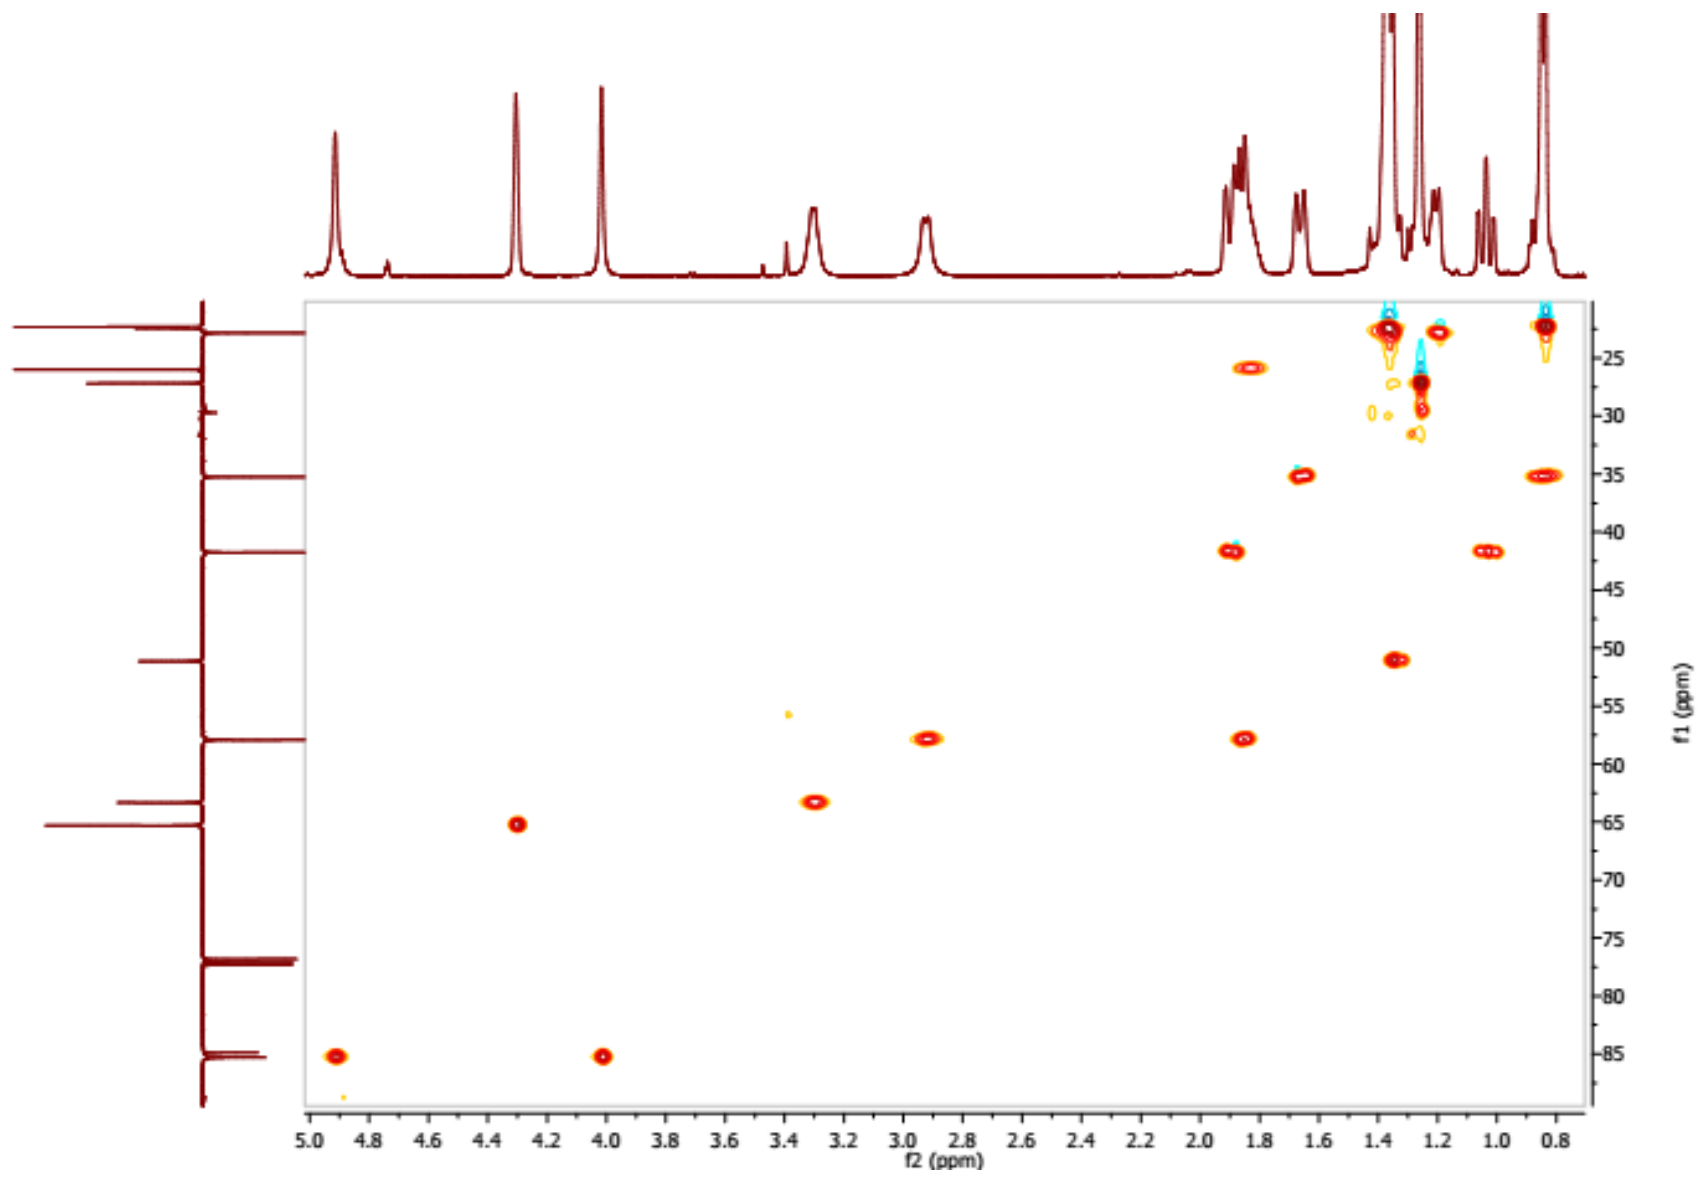

HMBC of compound 26

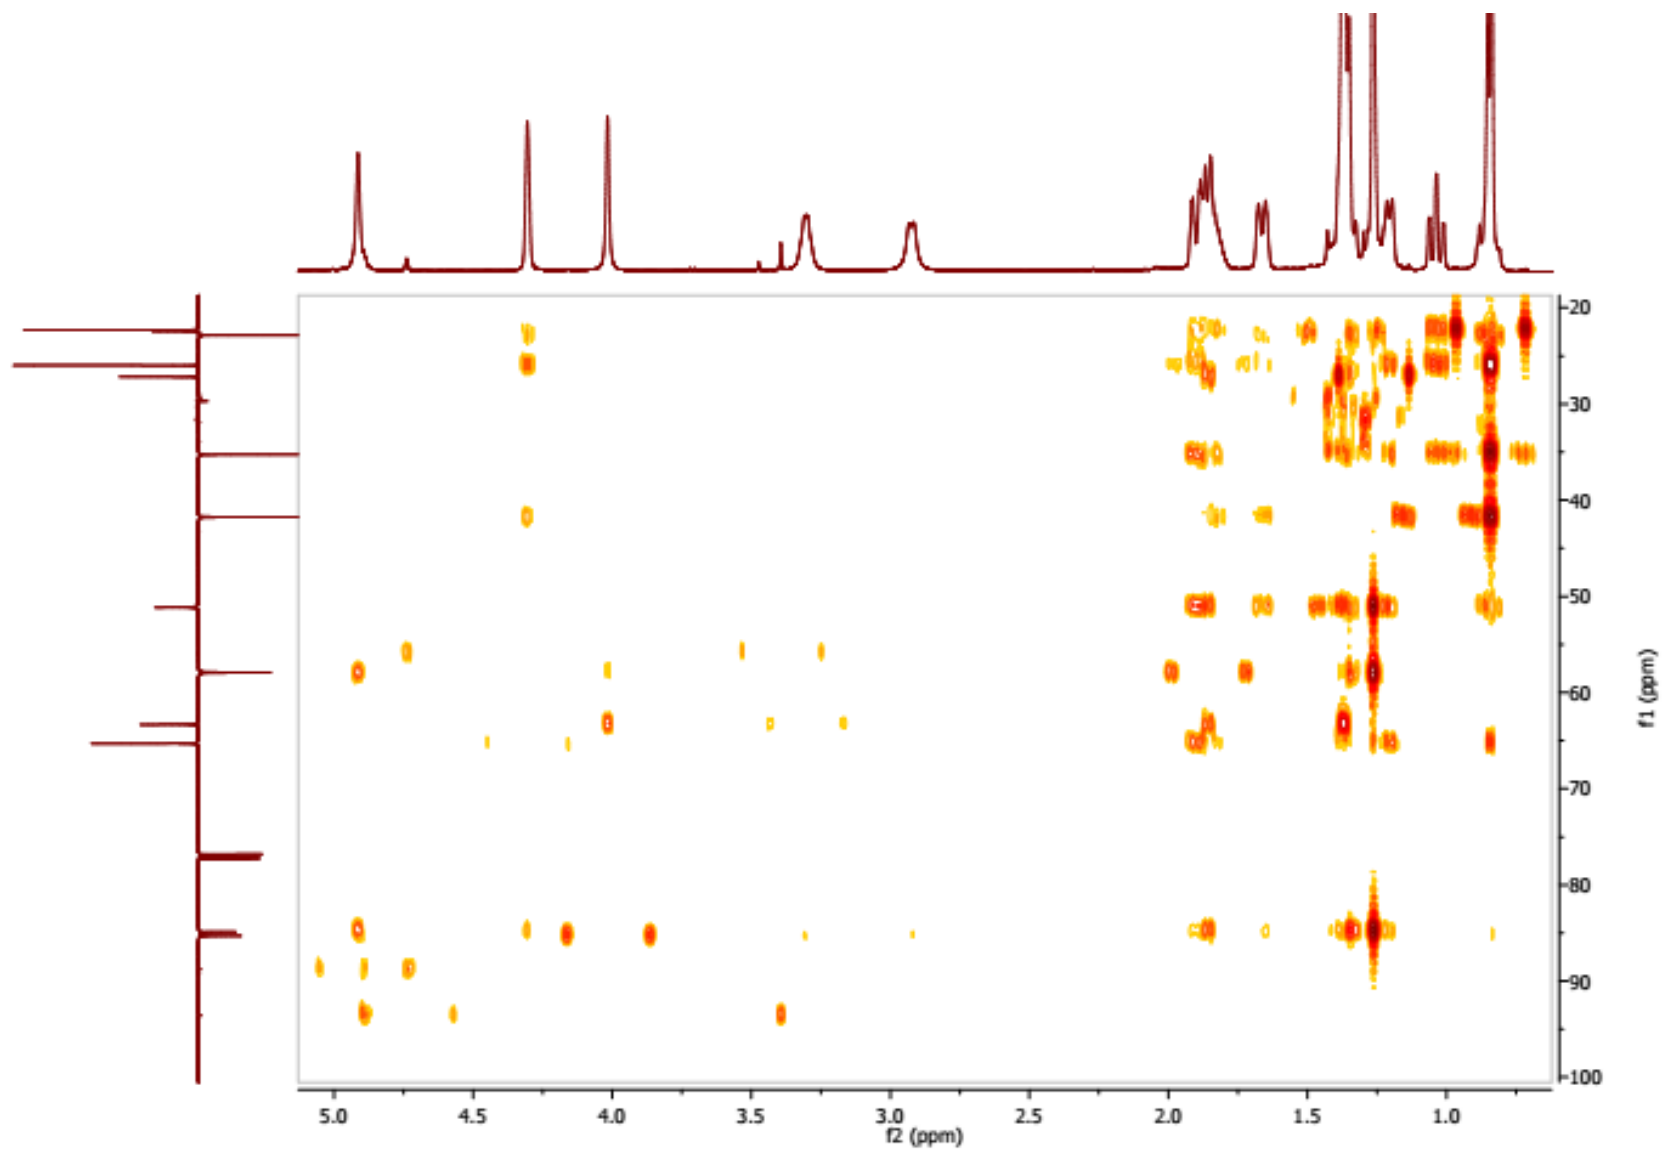

<sup>1</sup>H-NMR of compound 27

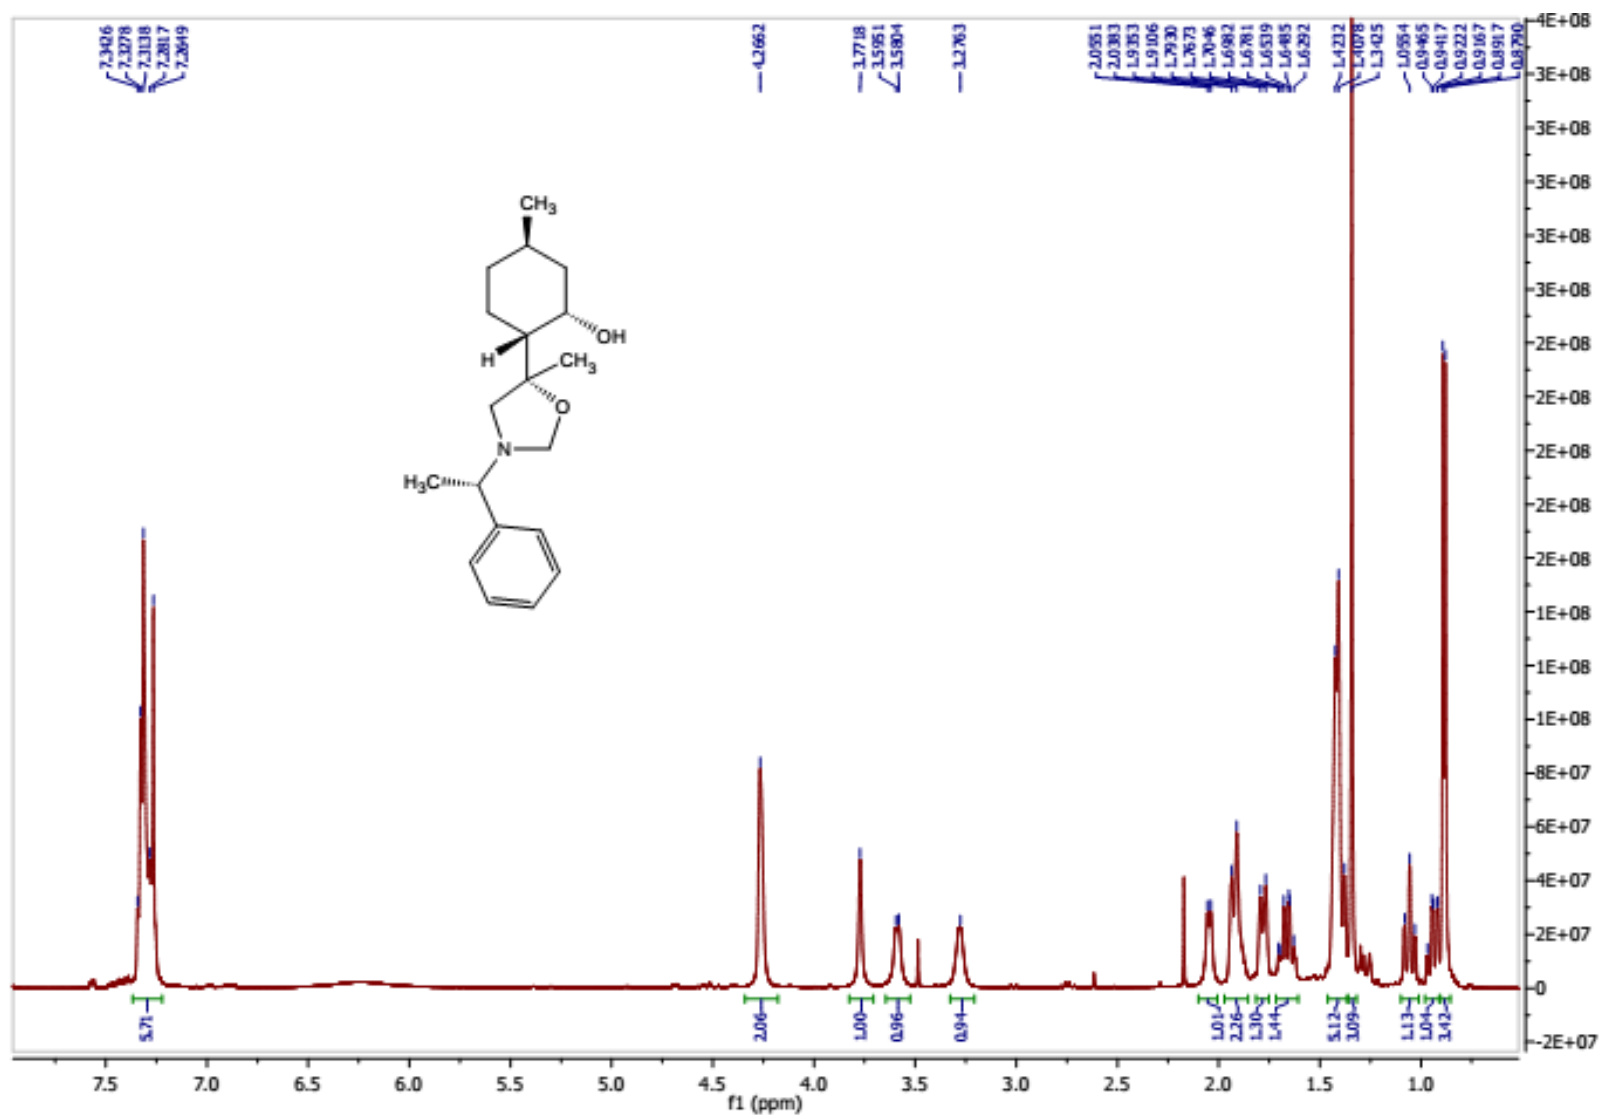

$^{13}\text{C}$ -NMR of compound **27**

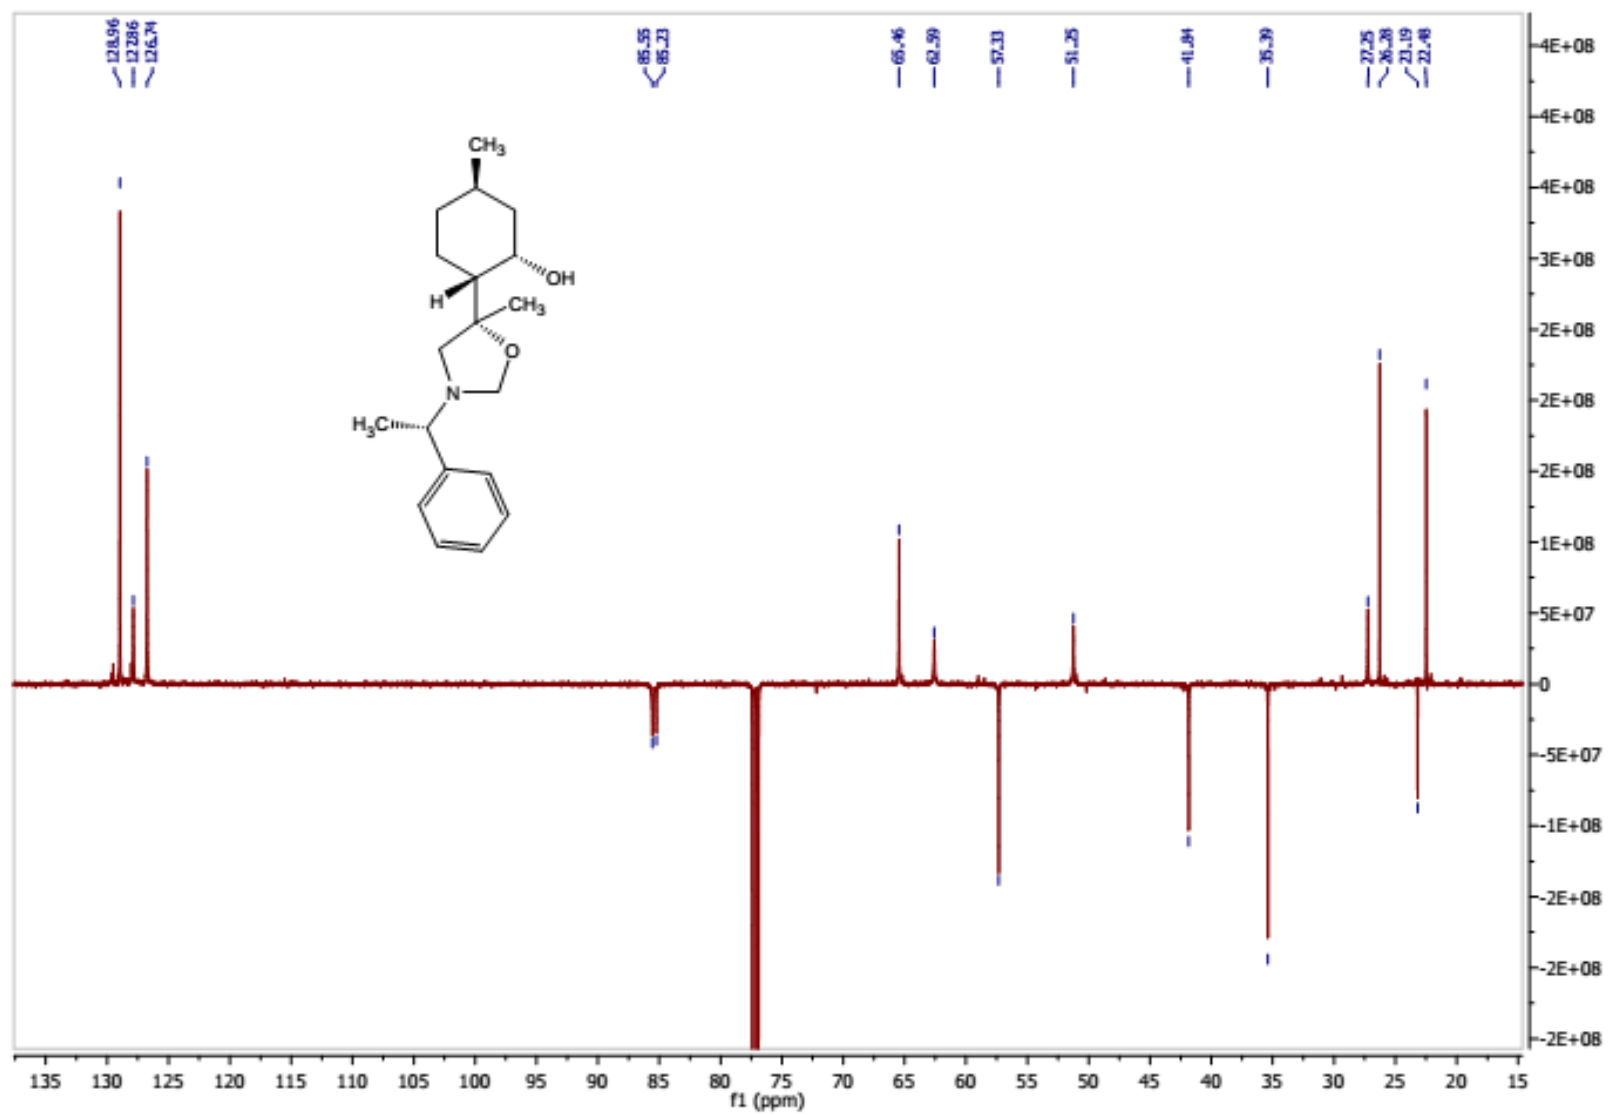

HSQC of compound **27**

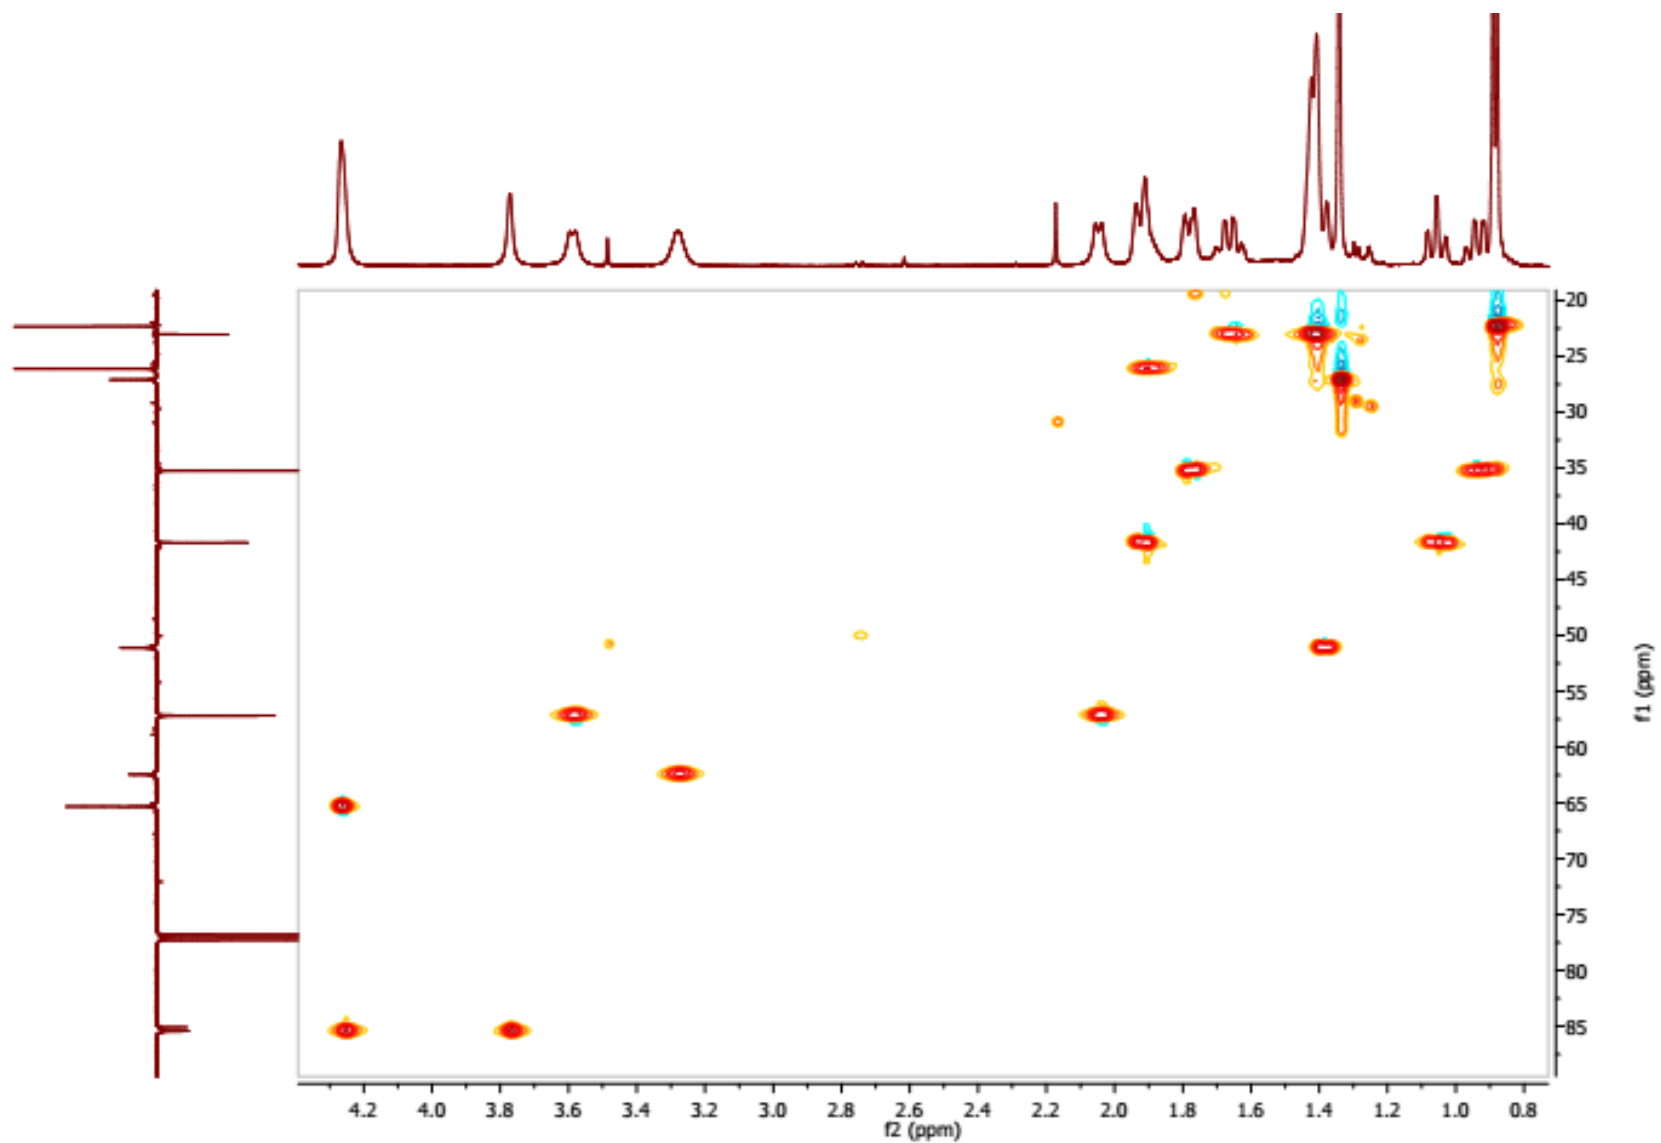

HMBC of compound 27

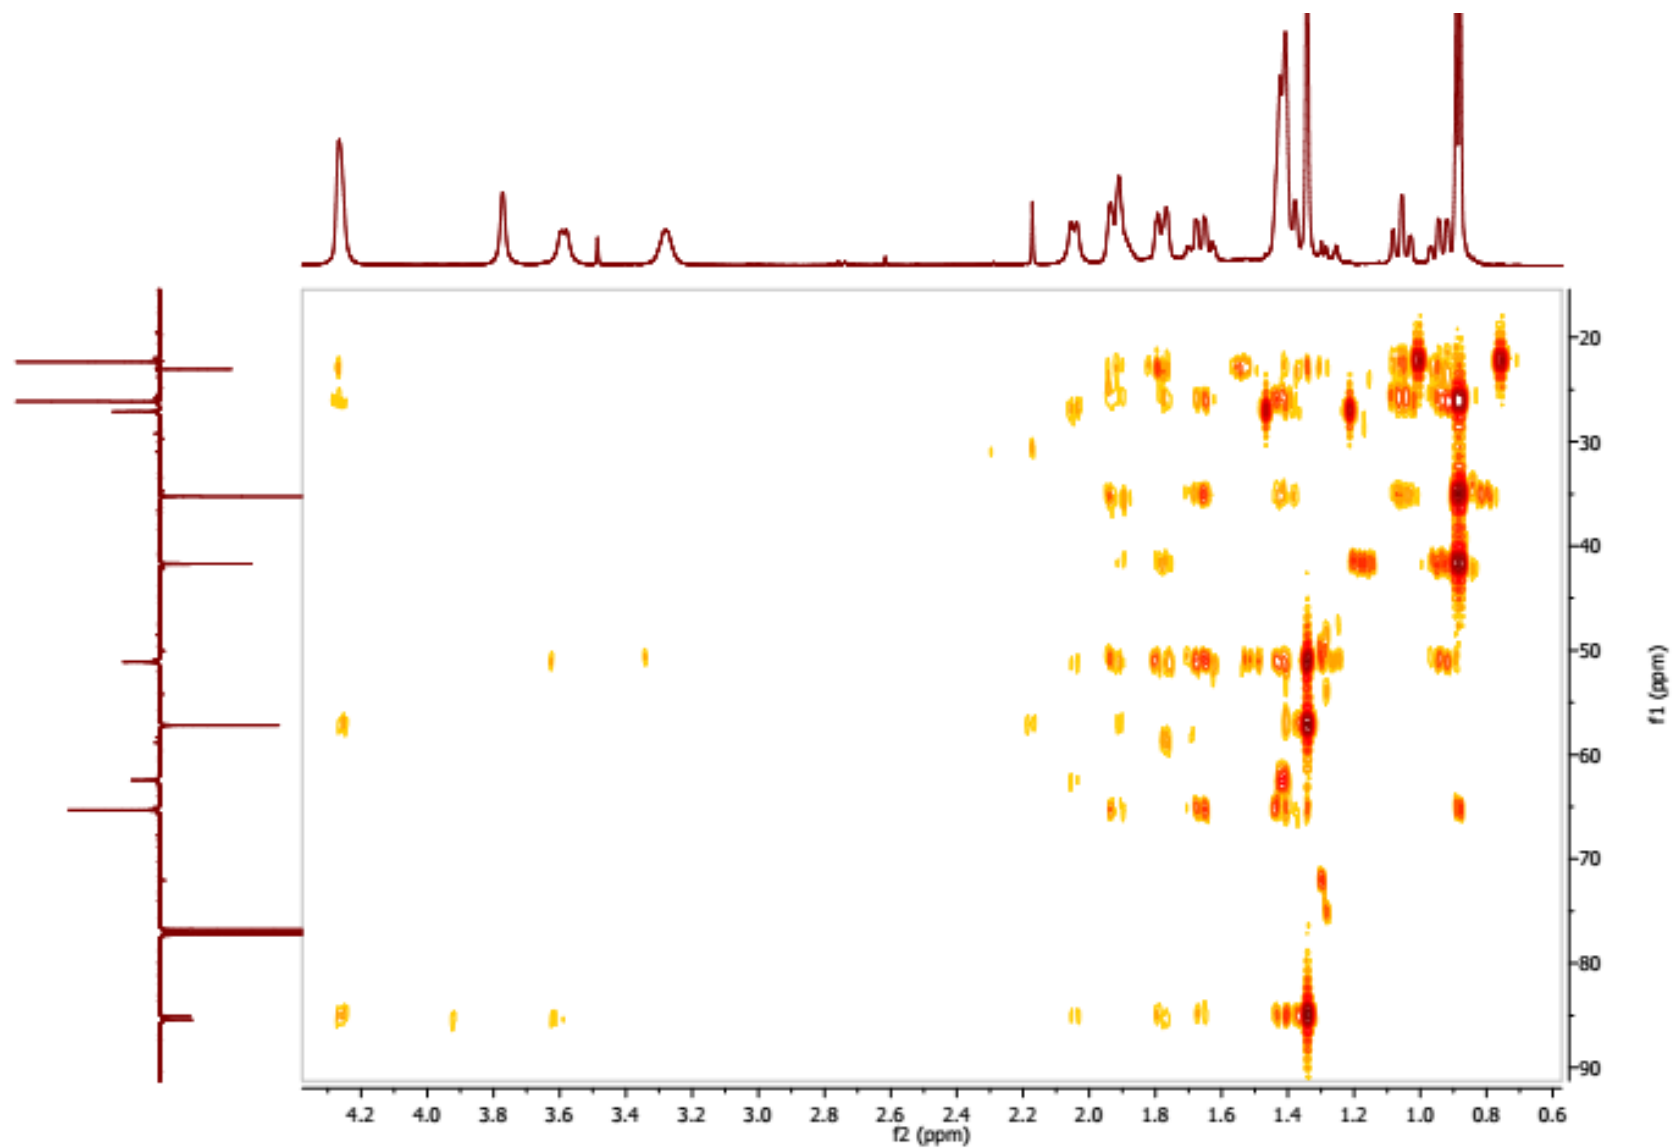

$^1\text{H-NMR}$  of compound **28**

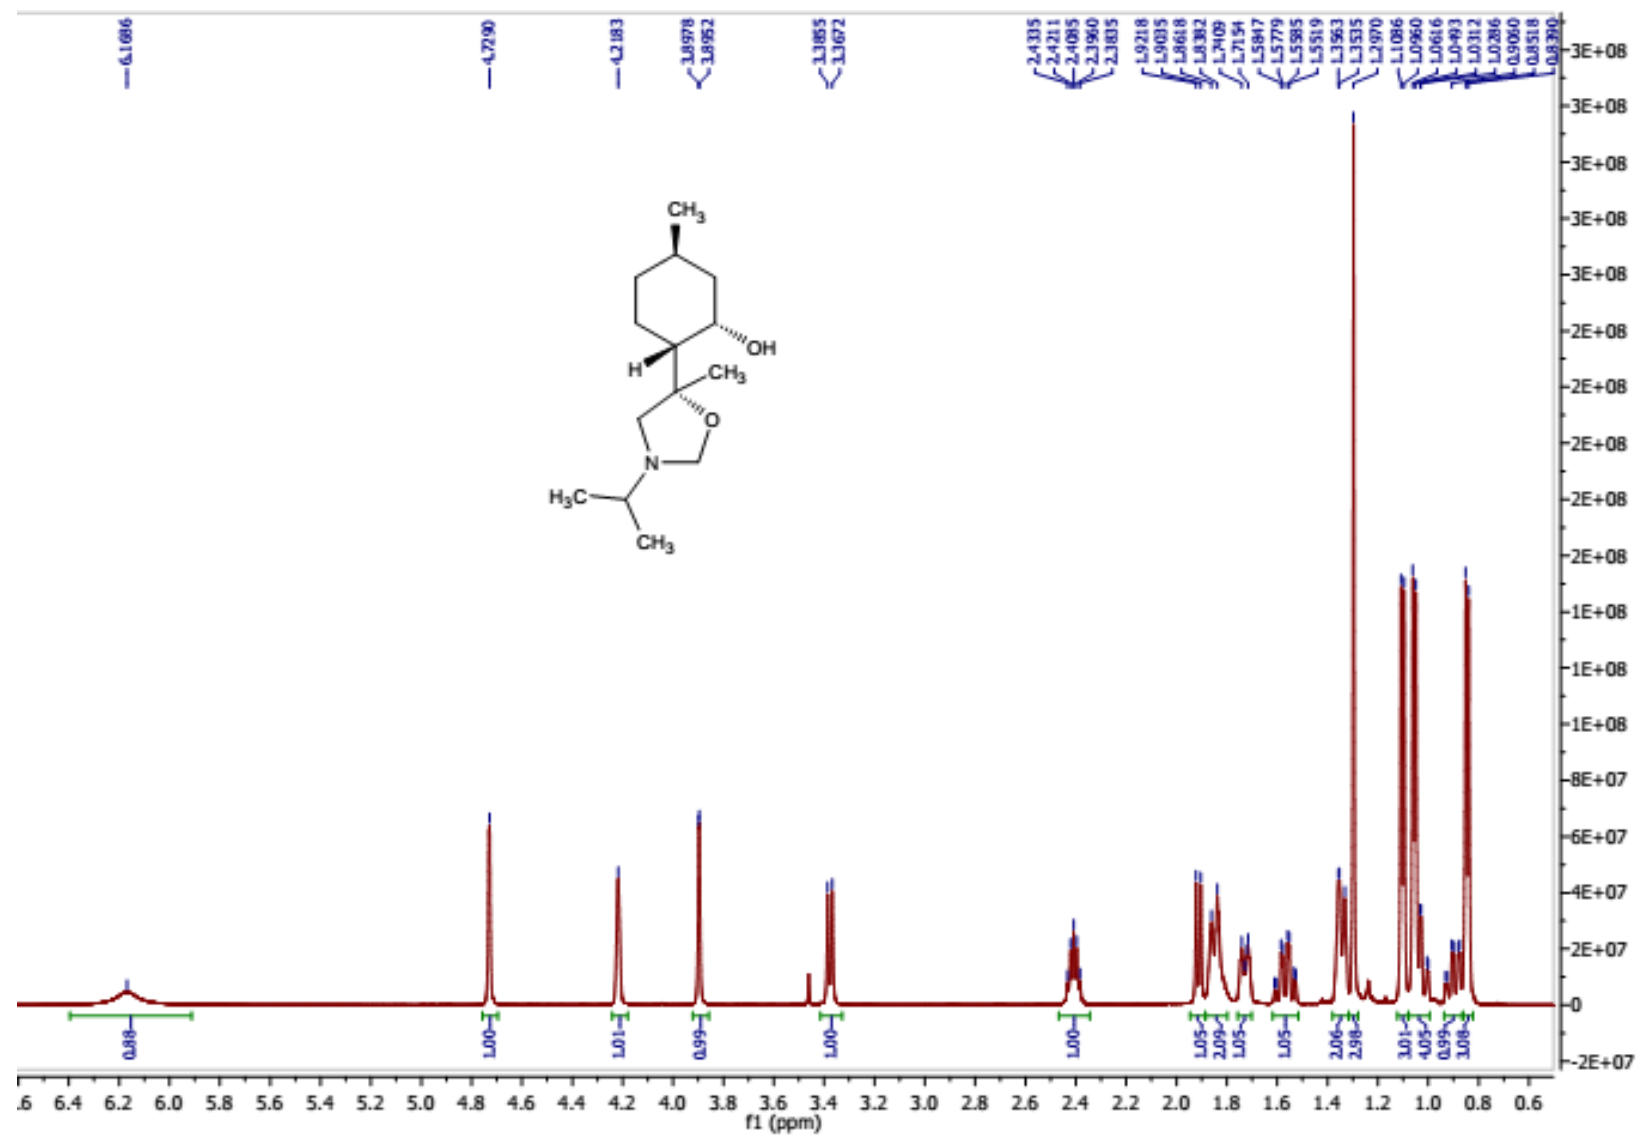



$^{13}\text{C}$ -NMR of compound **28**

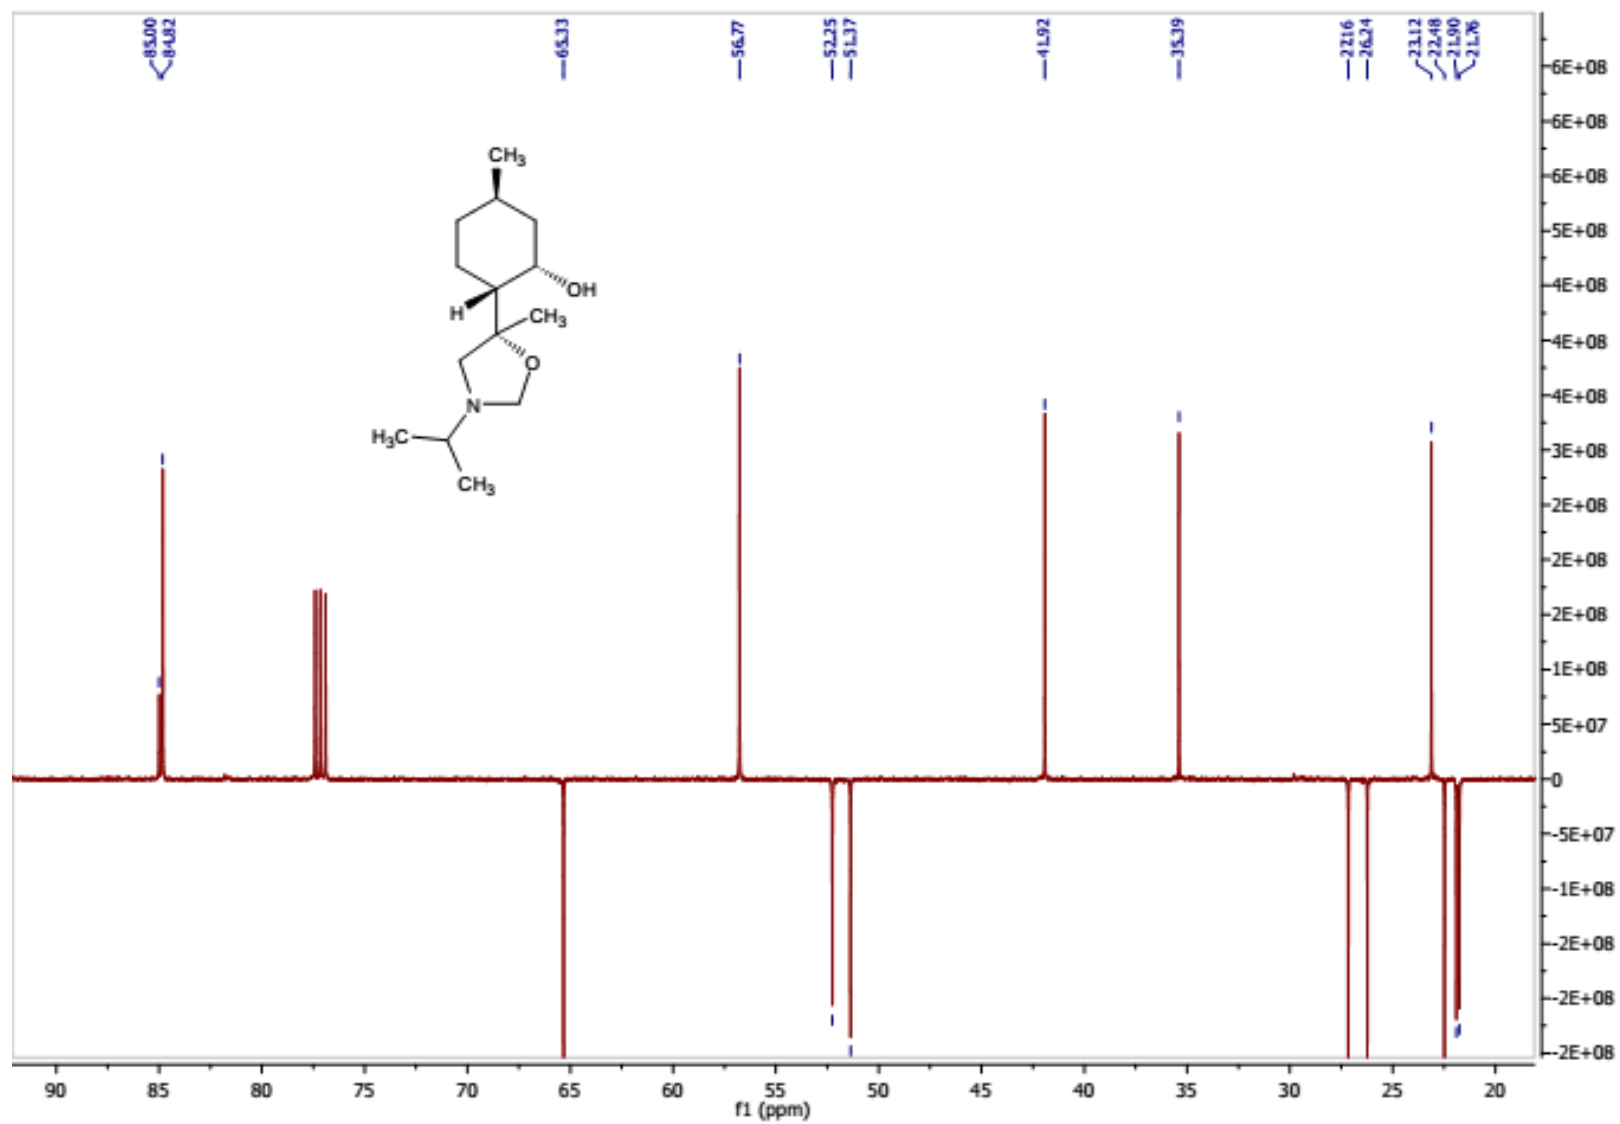

HSQC of compound **28**

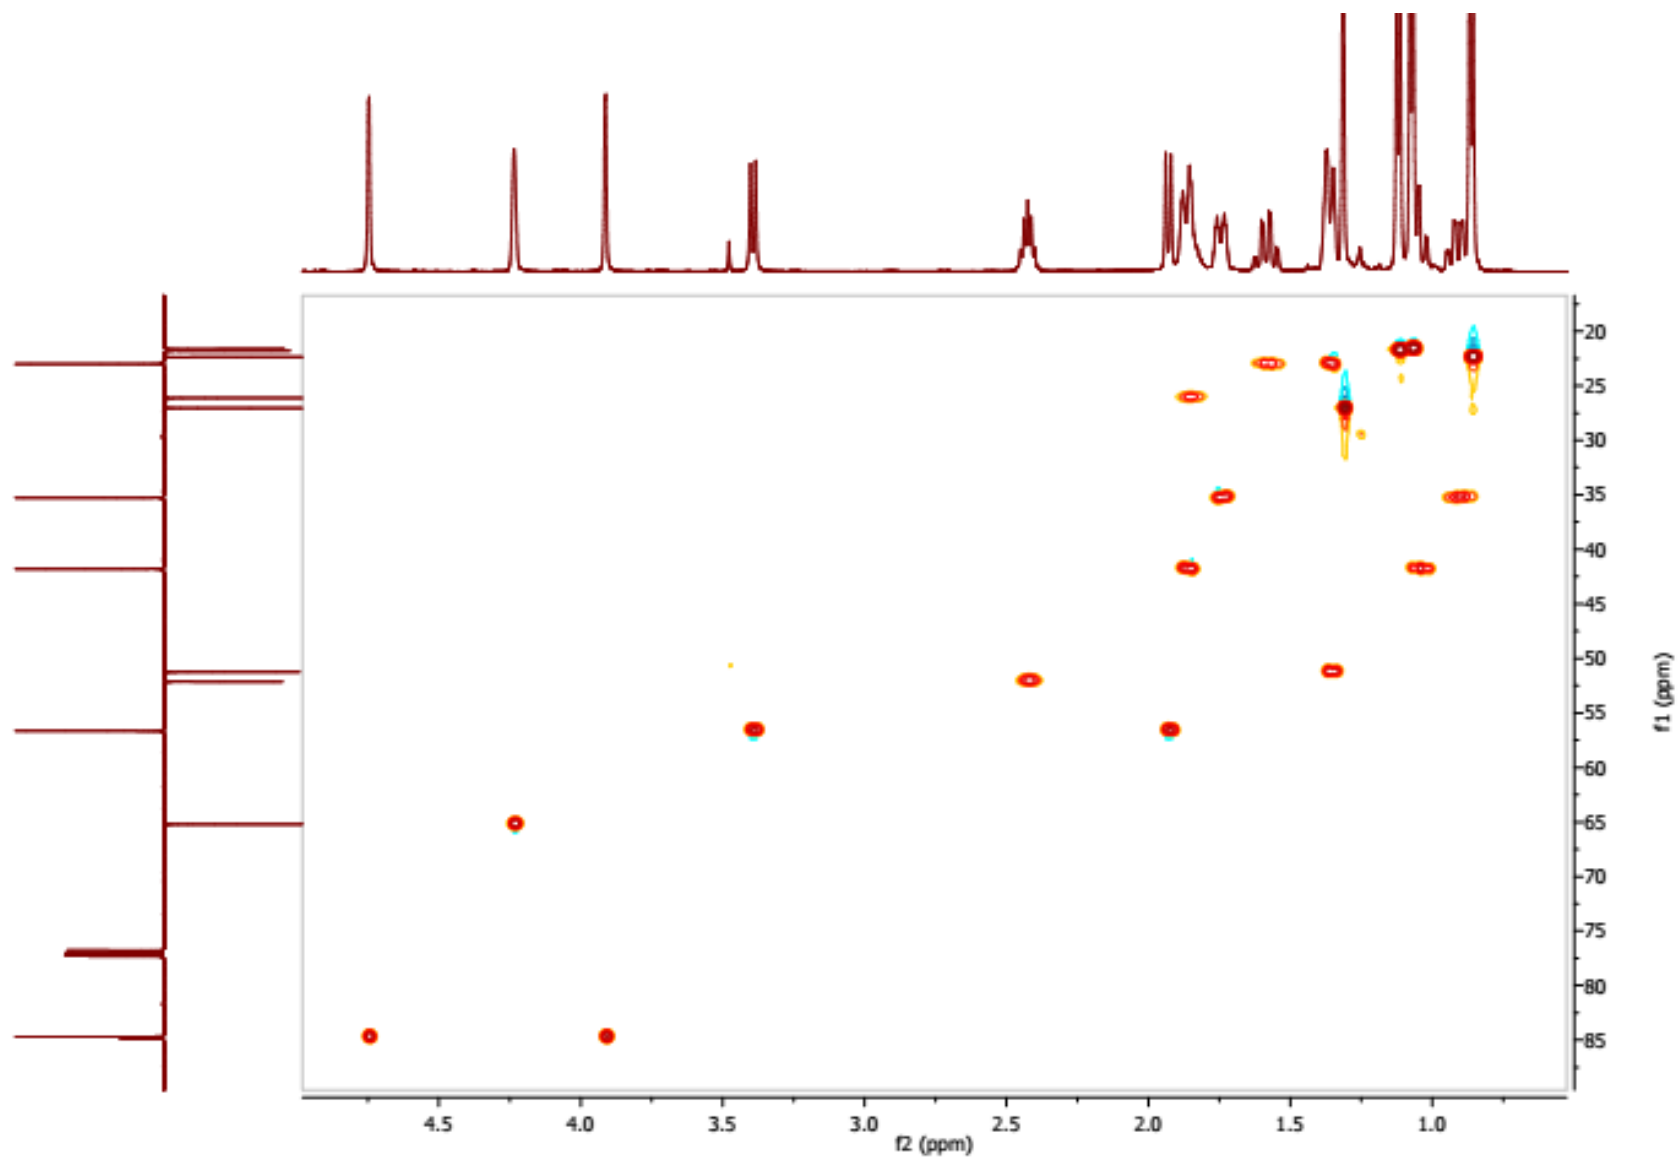

HMBC of compound 28

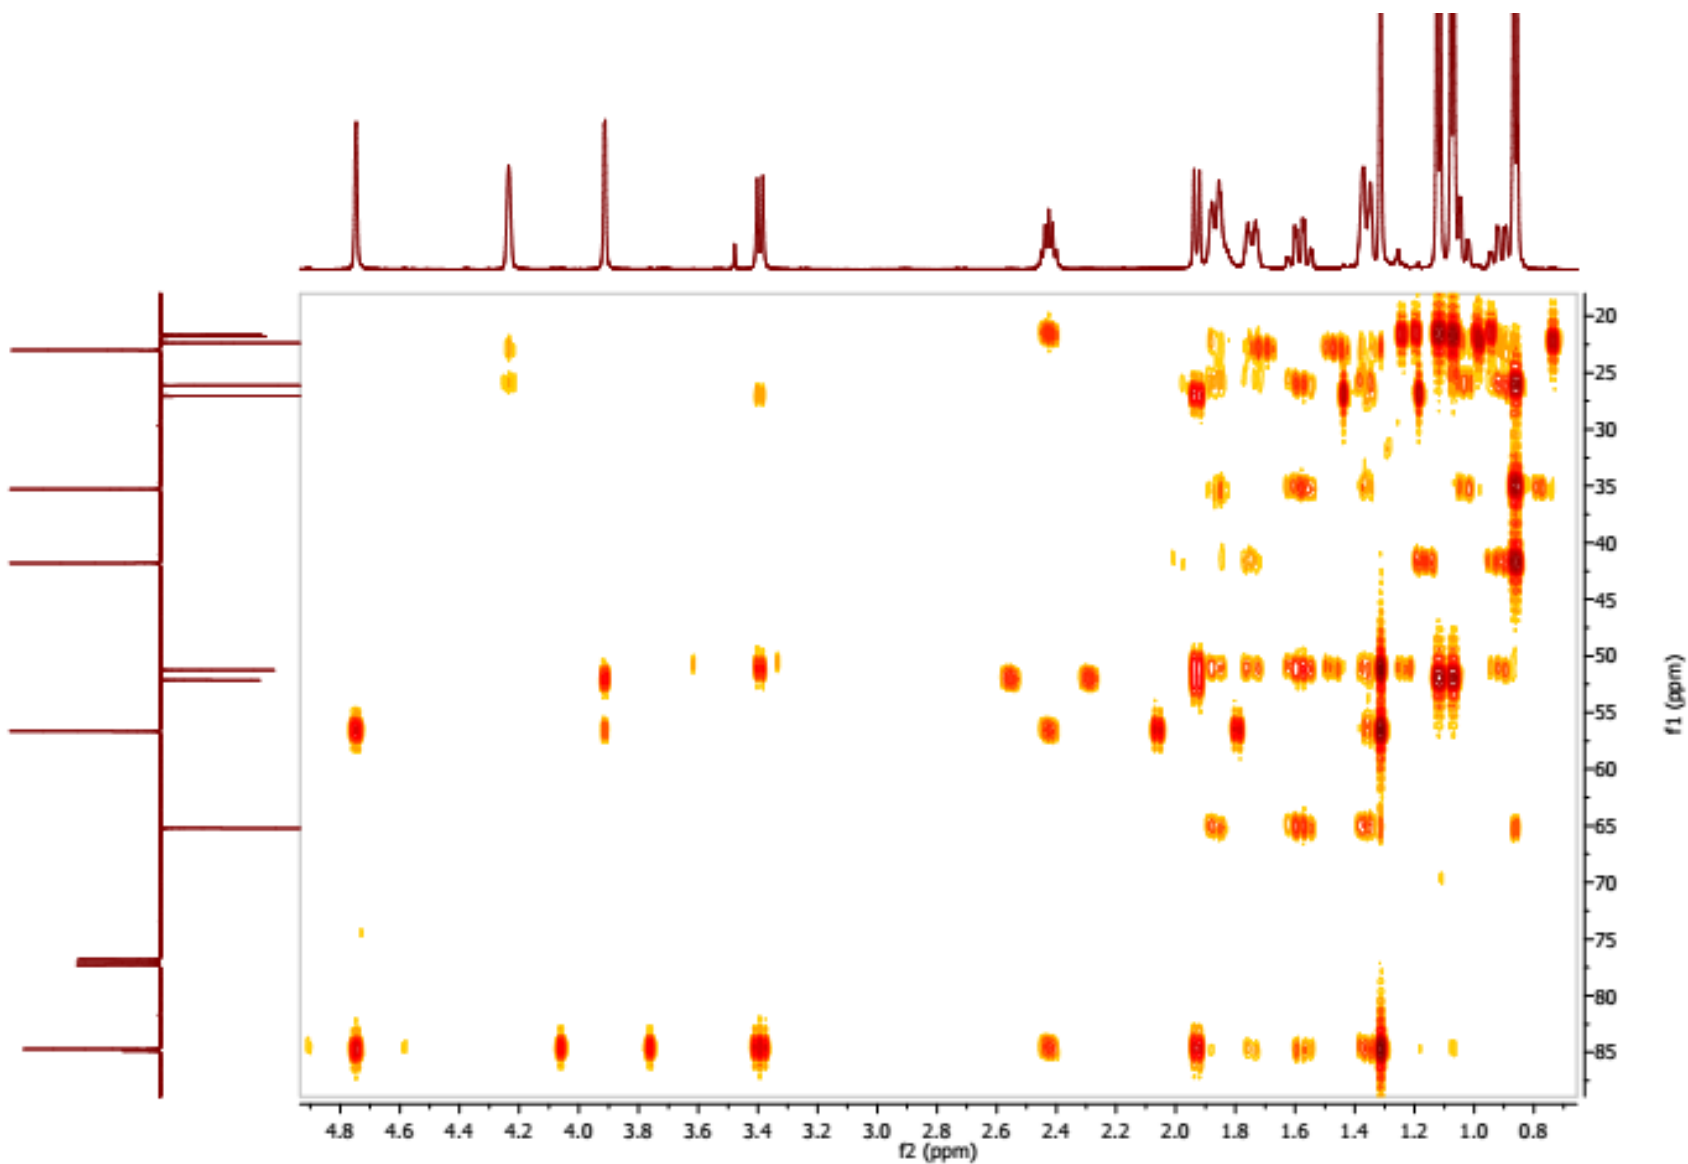

$^1\text{H-NMR}$  of compound **29**

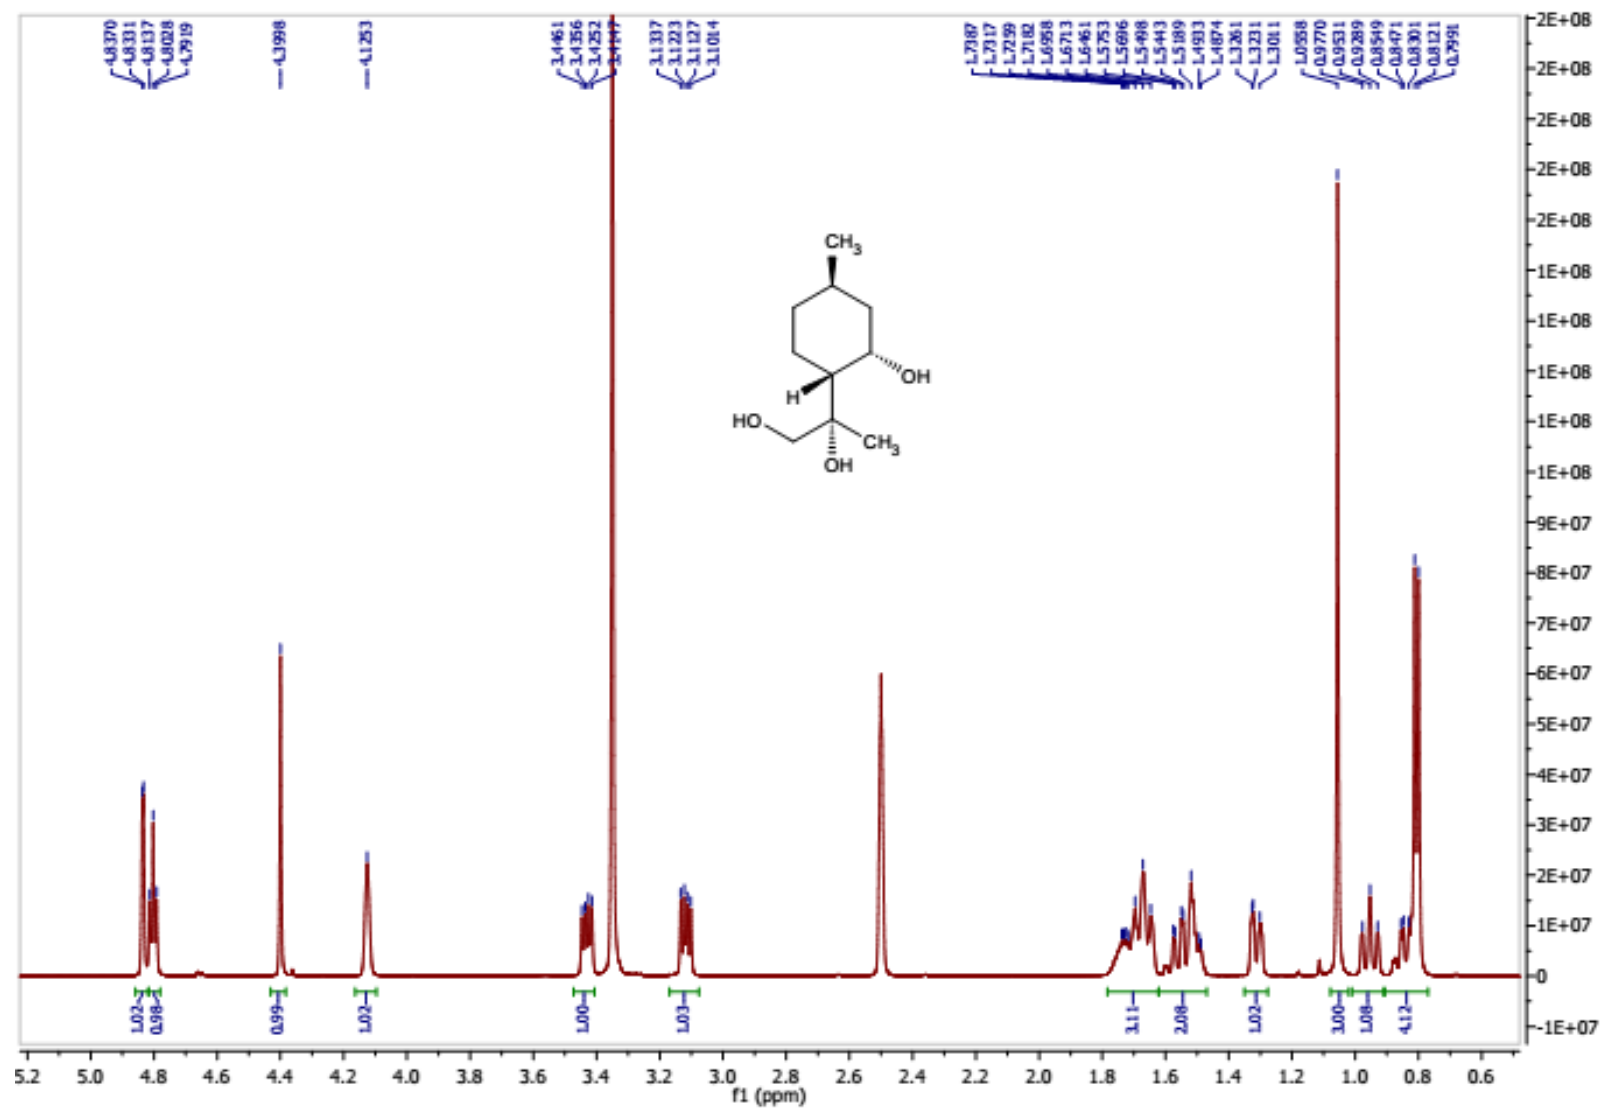

$^{13}\text{C}$ -NMR of compound **29**

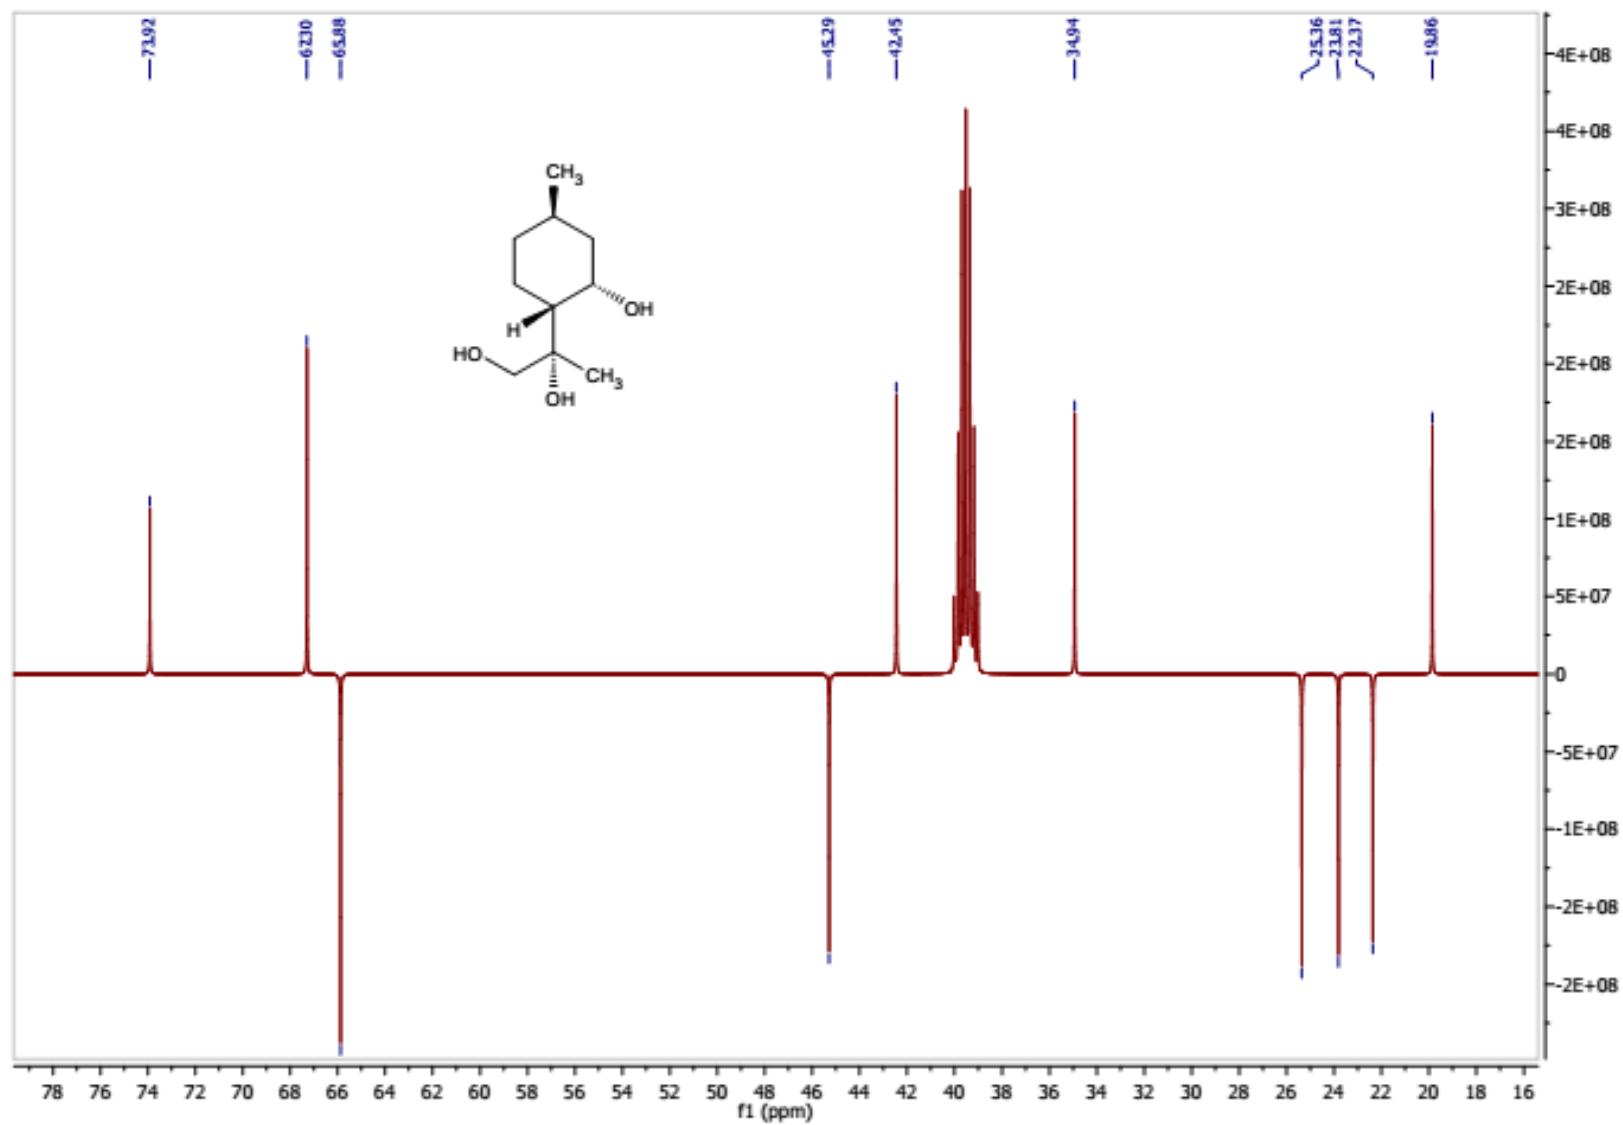

COSY of compound **29**

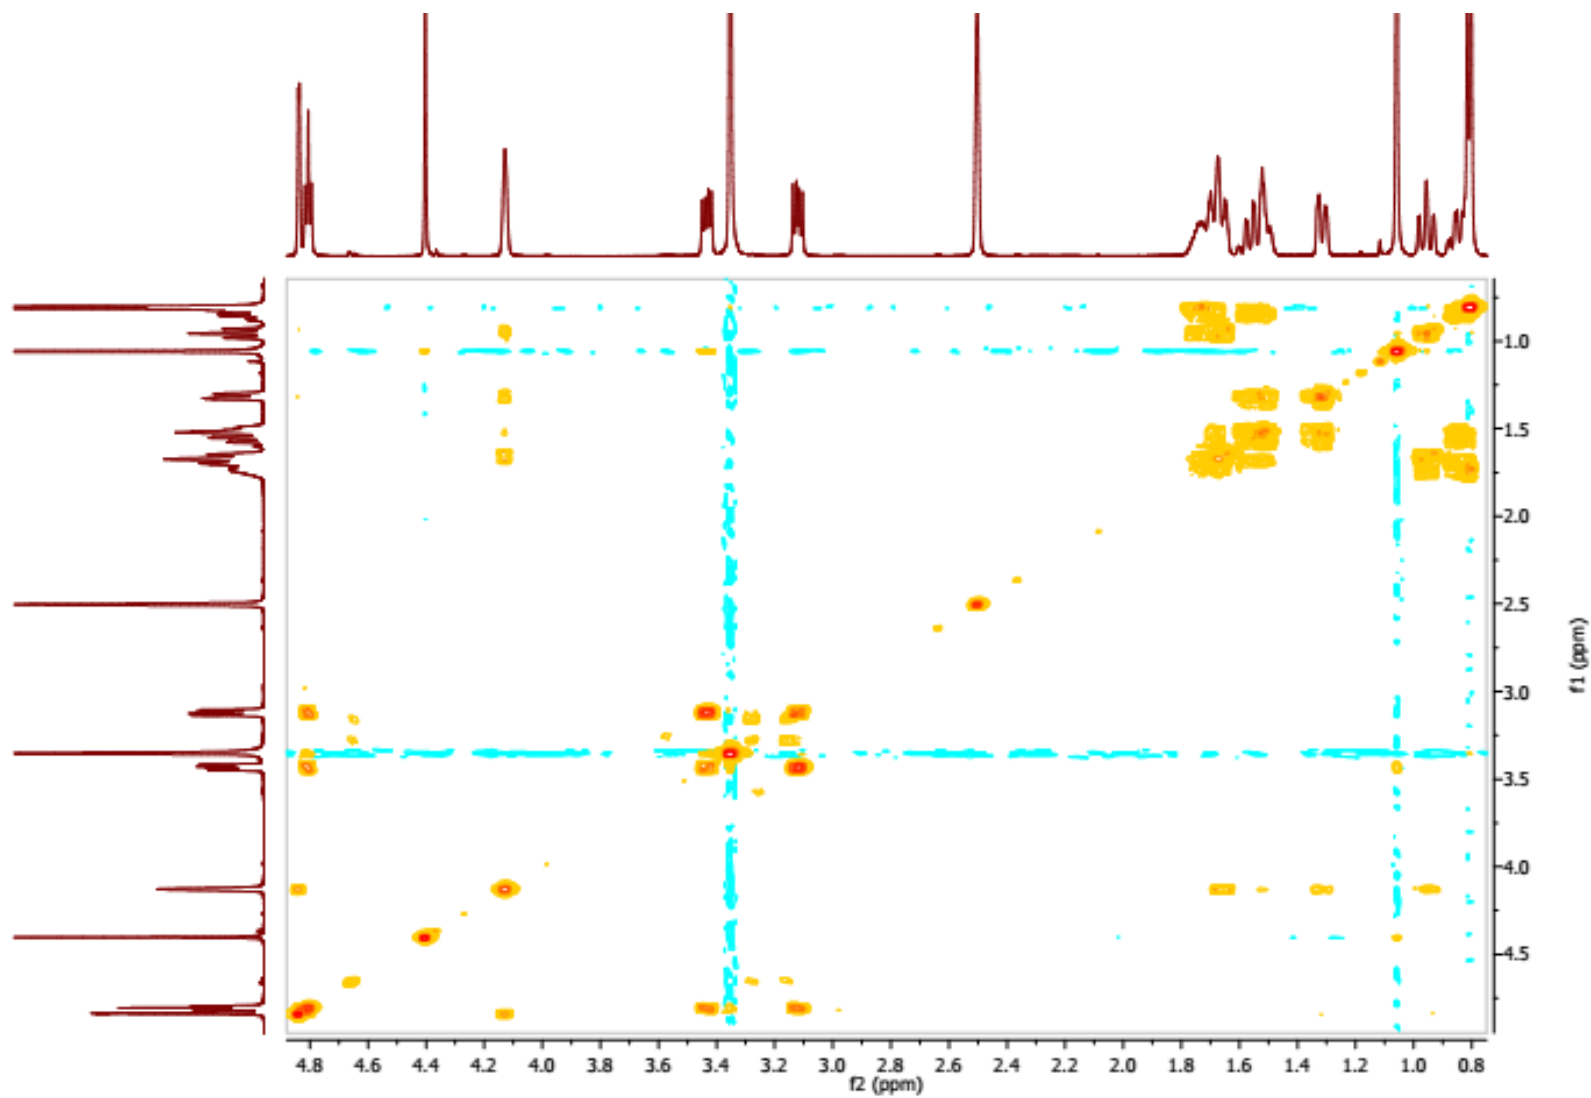

NOESY of compound **29**

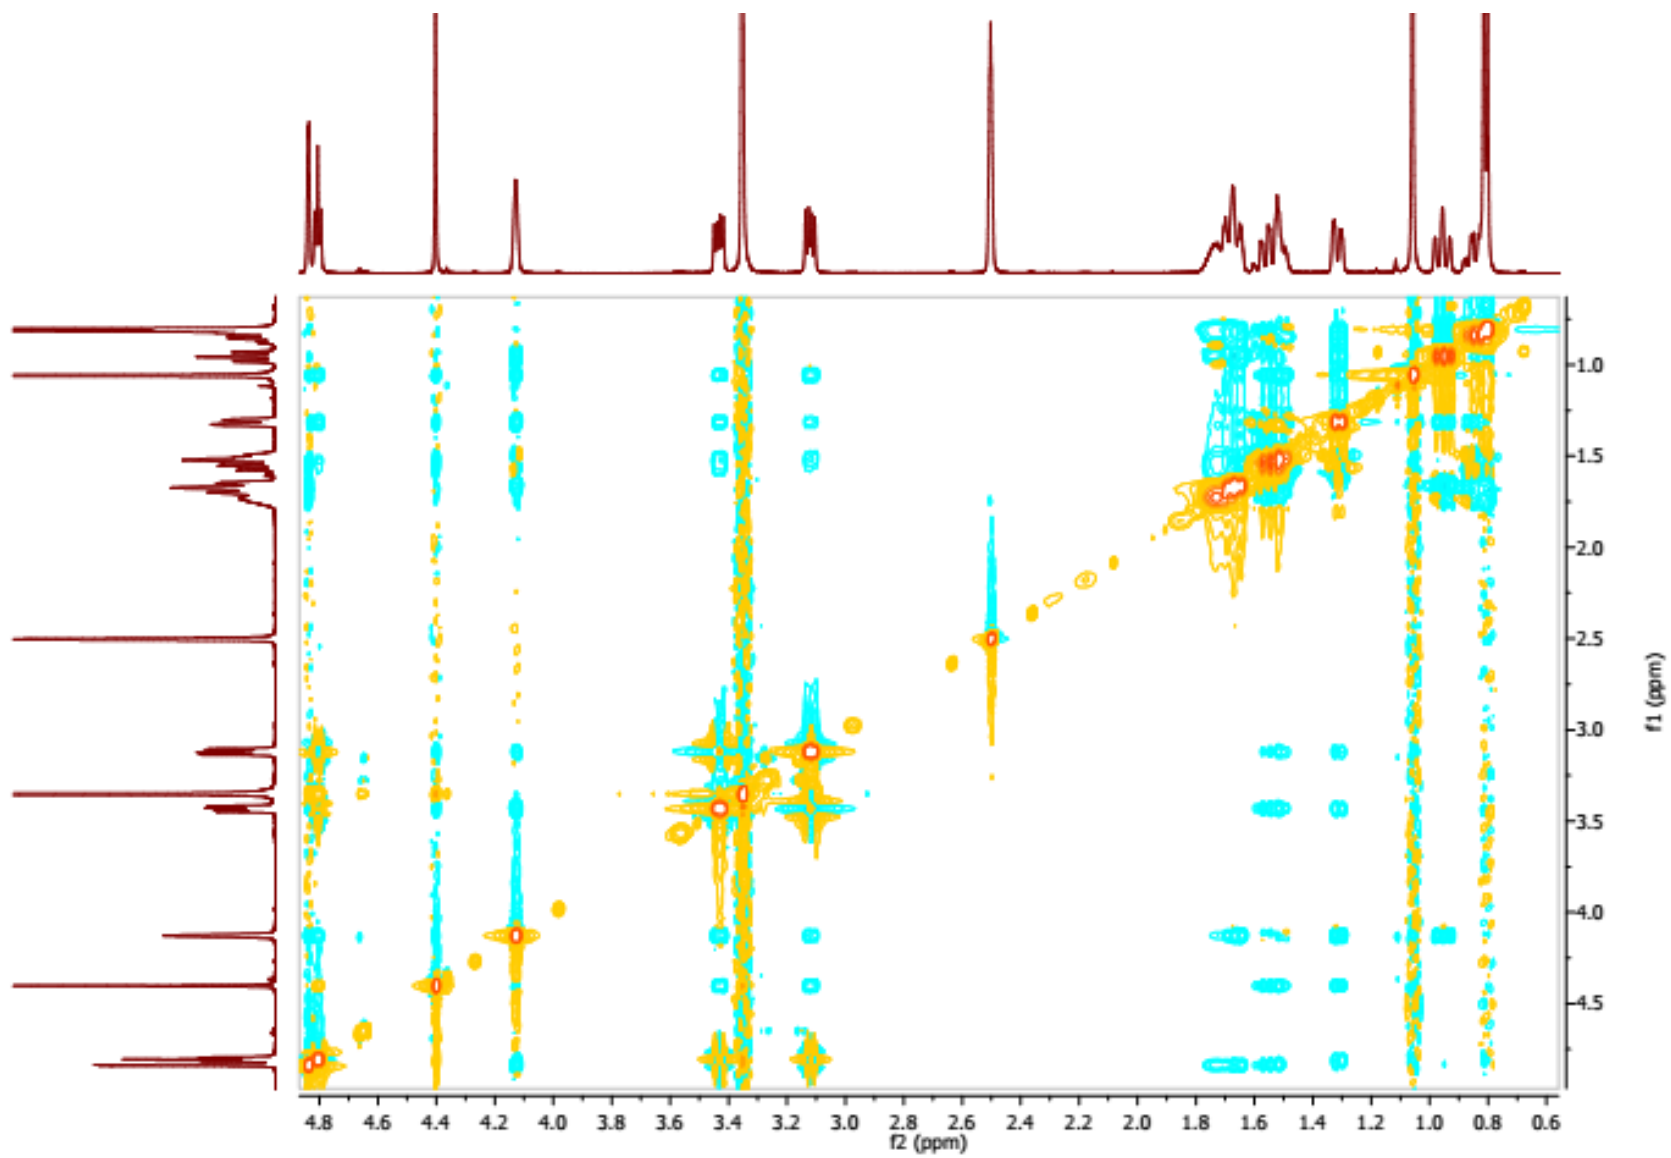

HSQC of compound **29**

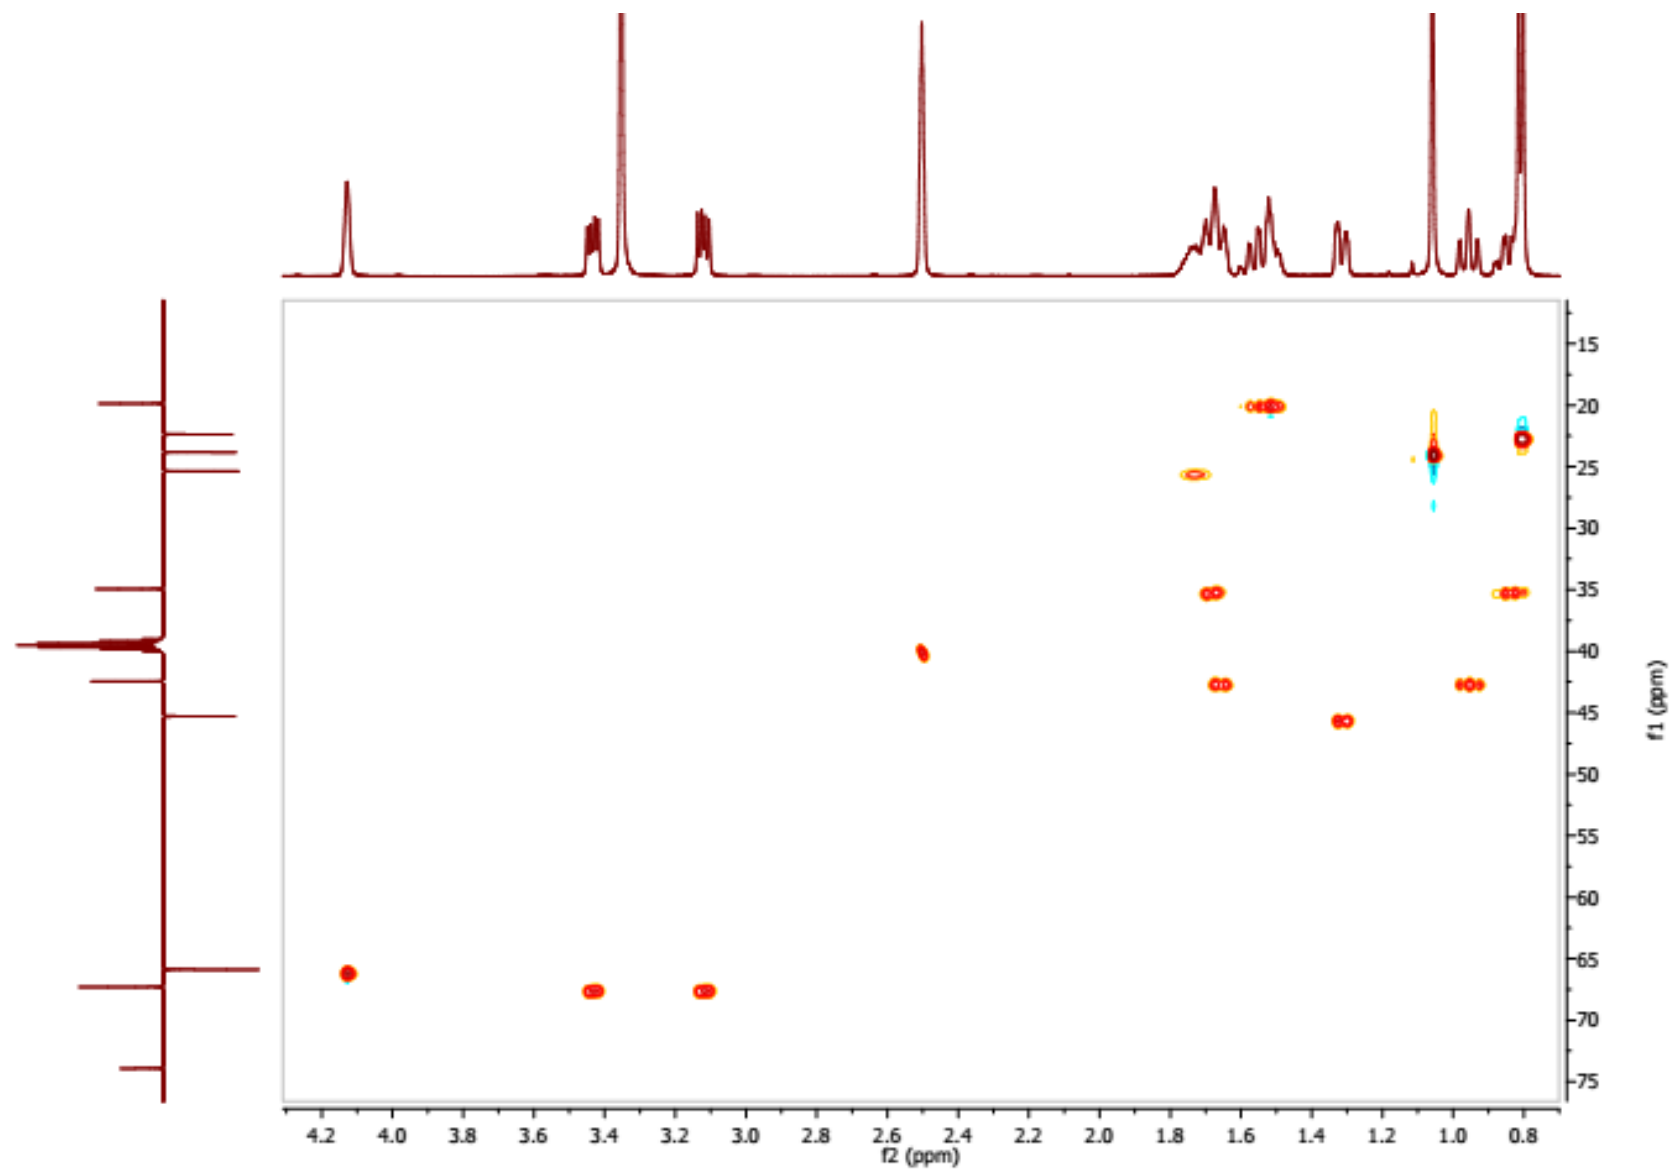



HMBC of compound 29

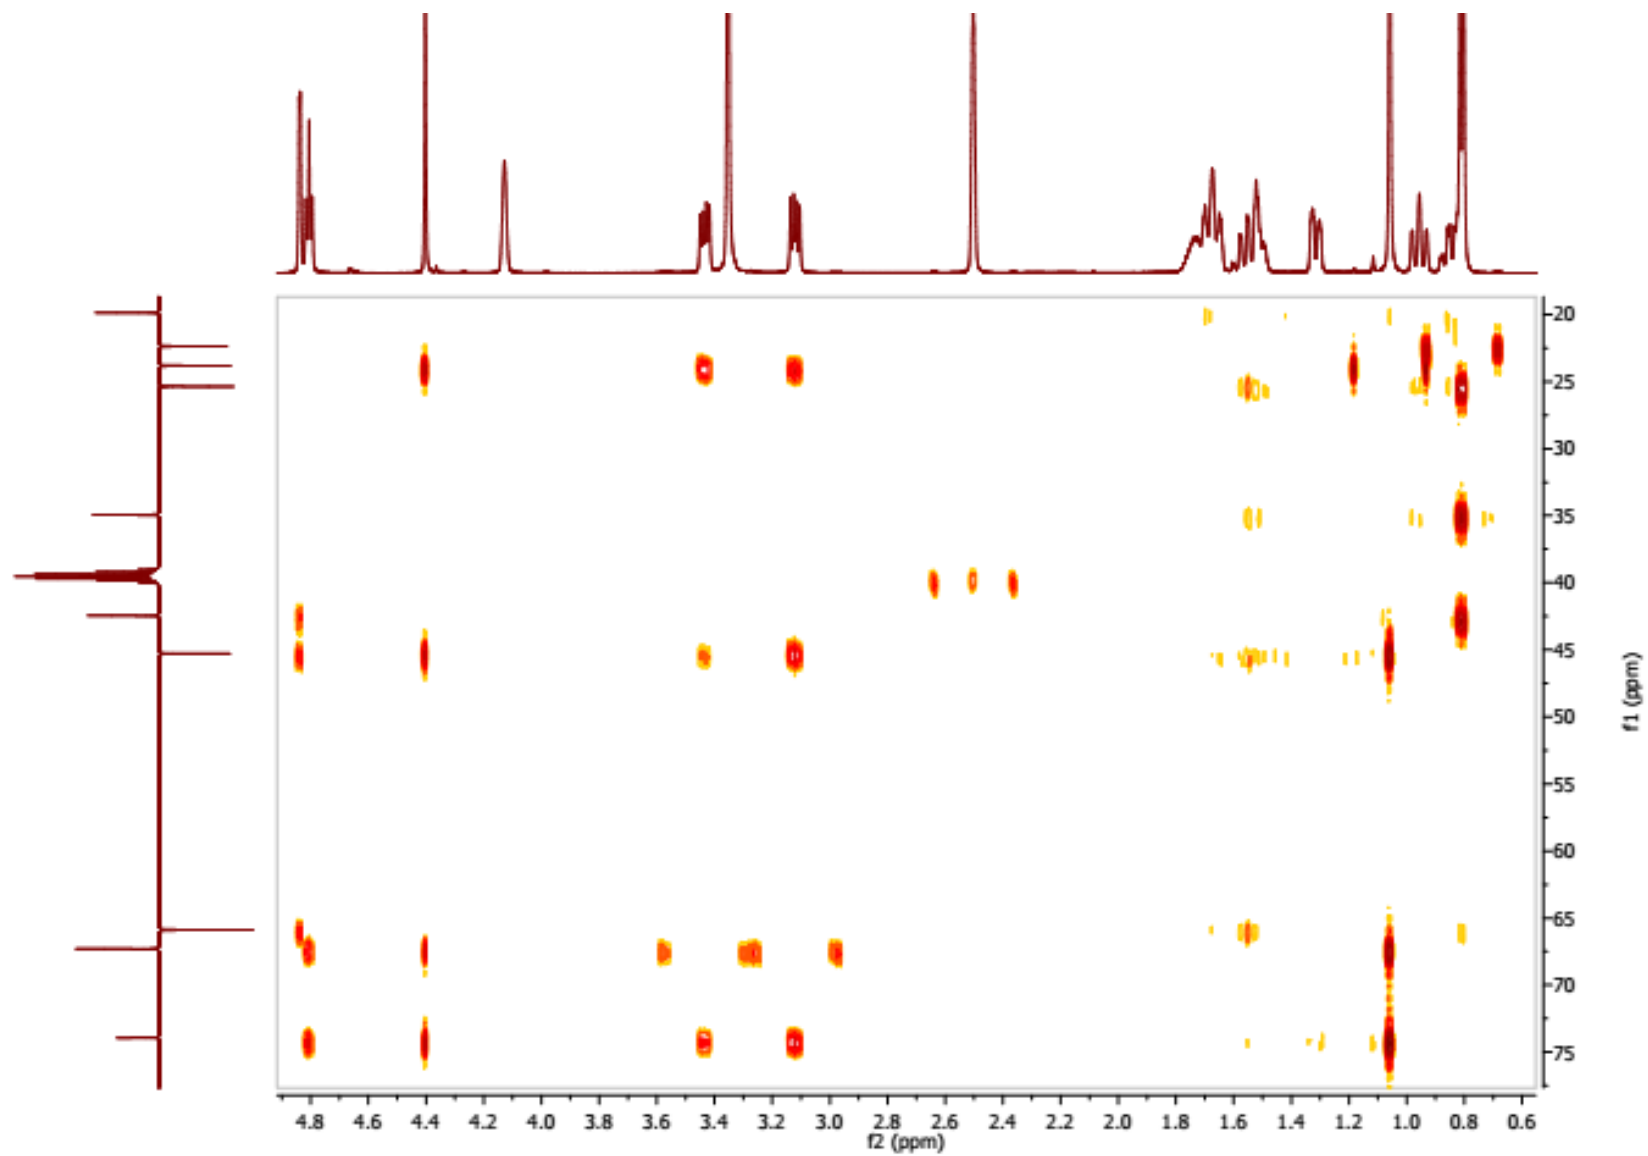

$^1\text{H-NMR}$  of compound **30**

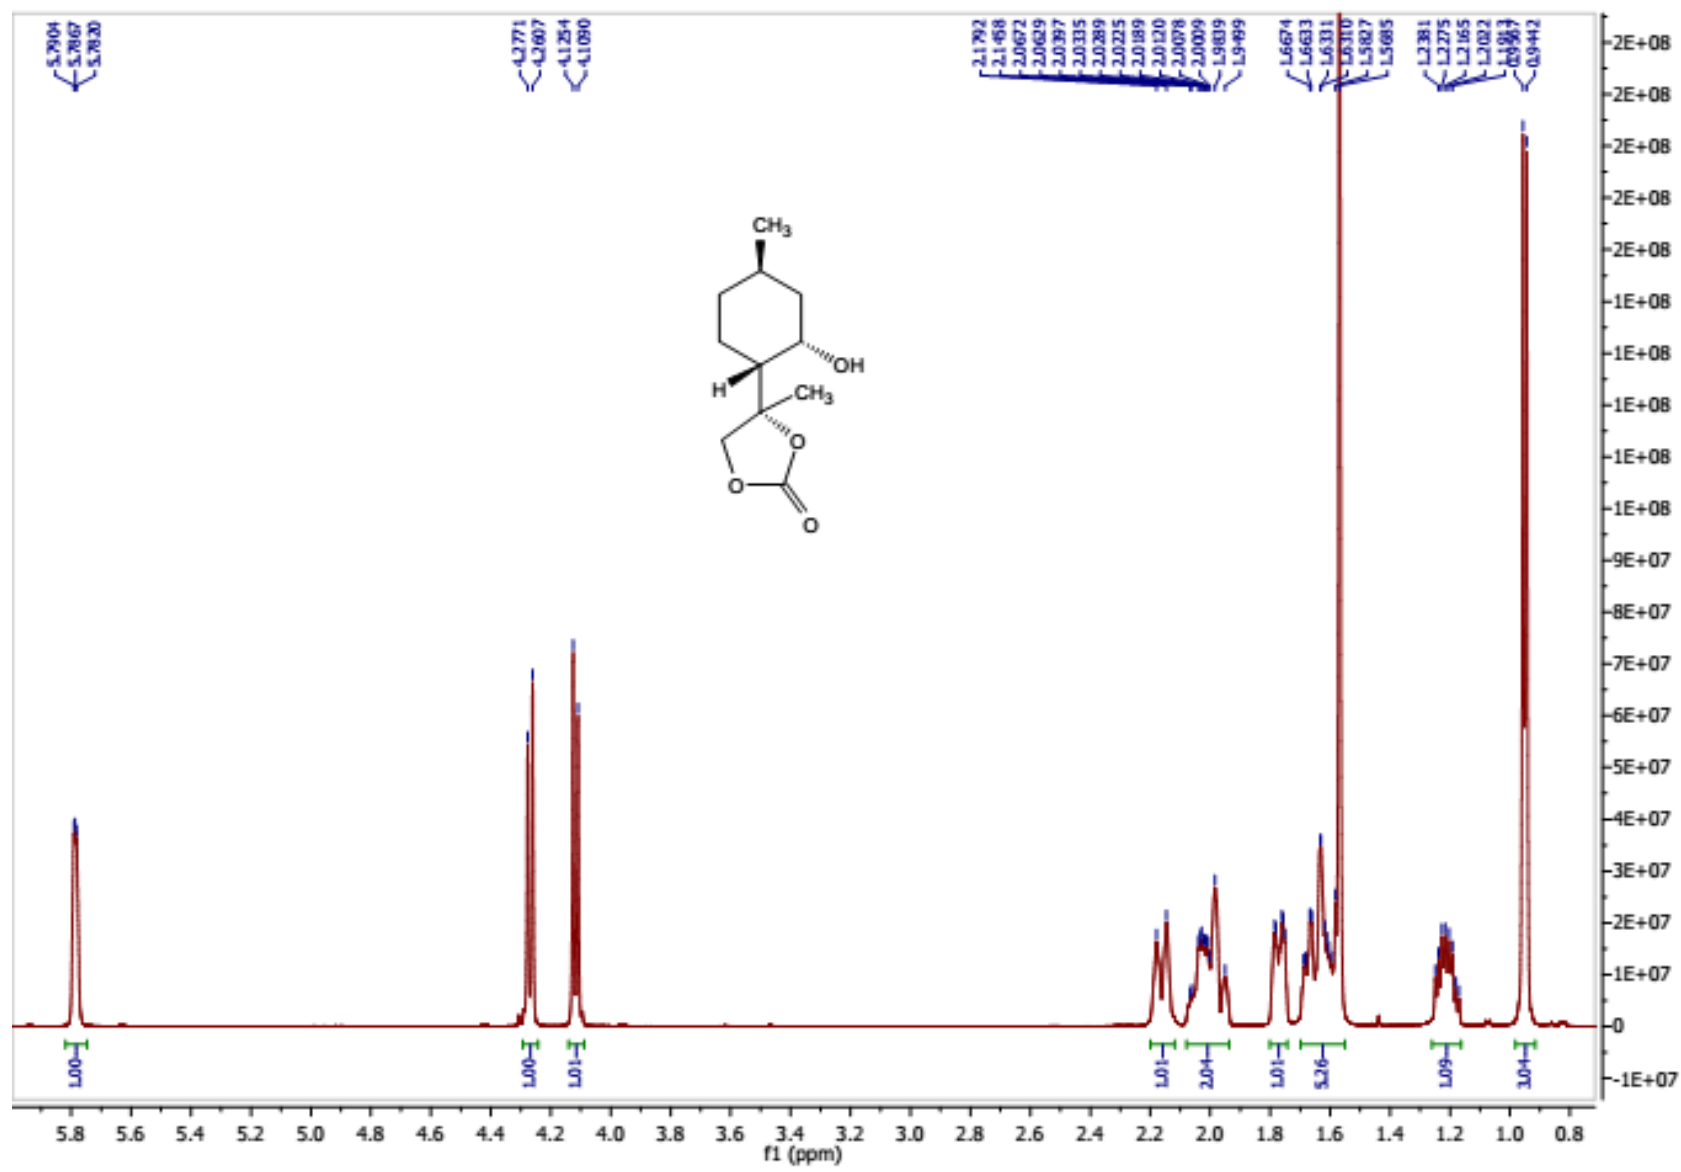

$^{13}\text{C}$ -NMR of compound **30**

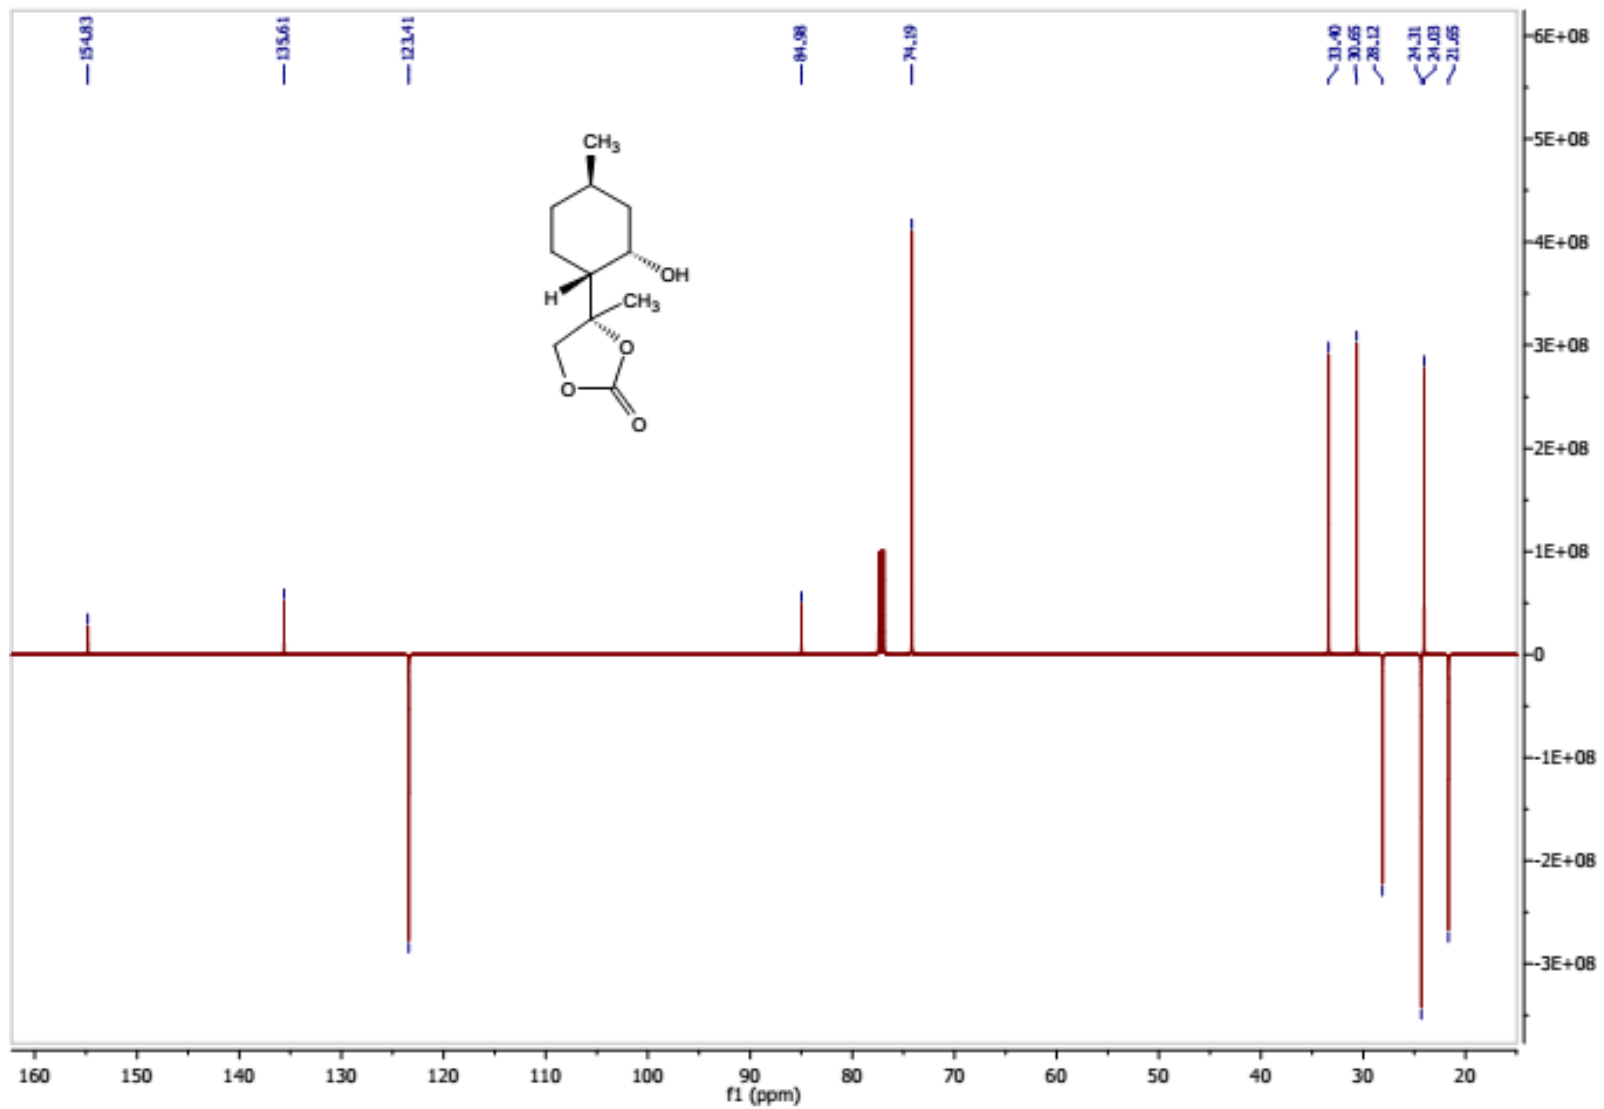

COSY of compound **30**

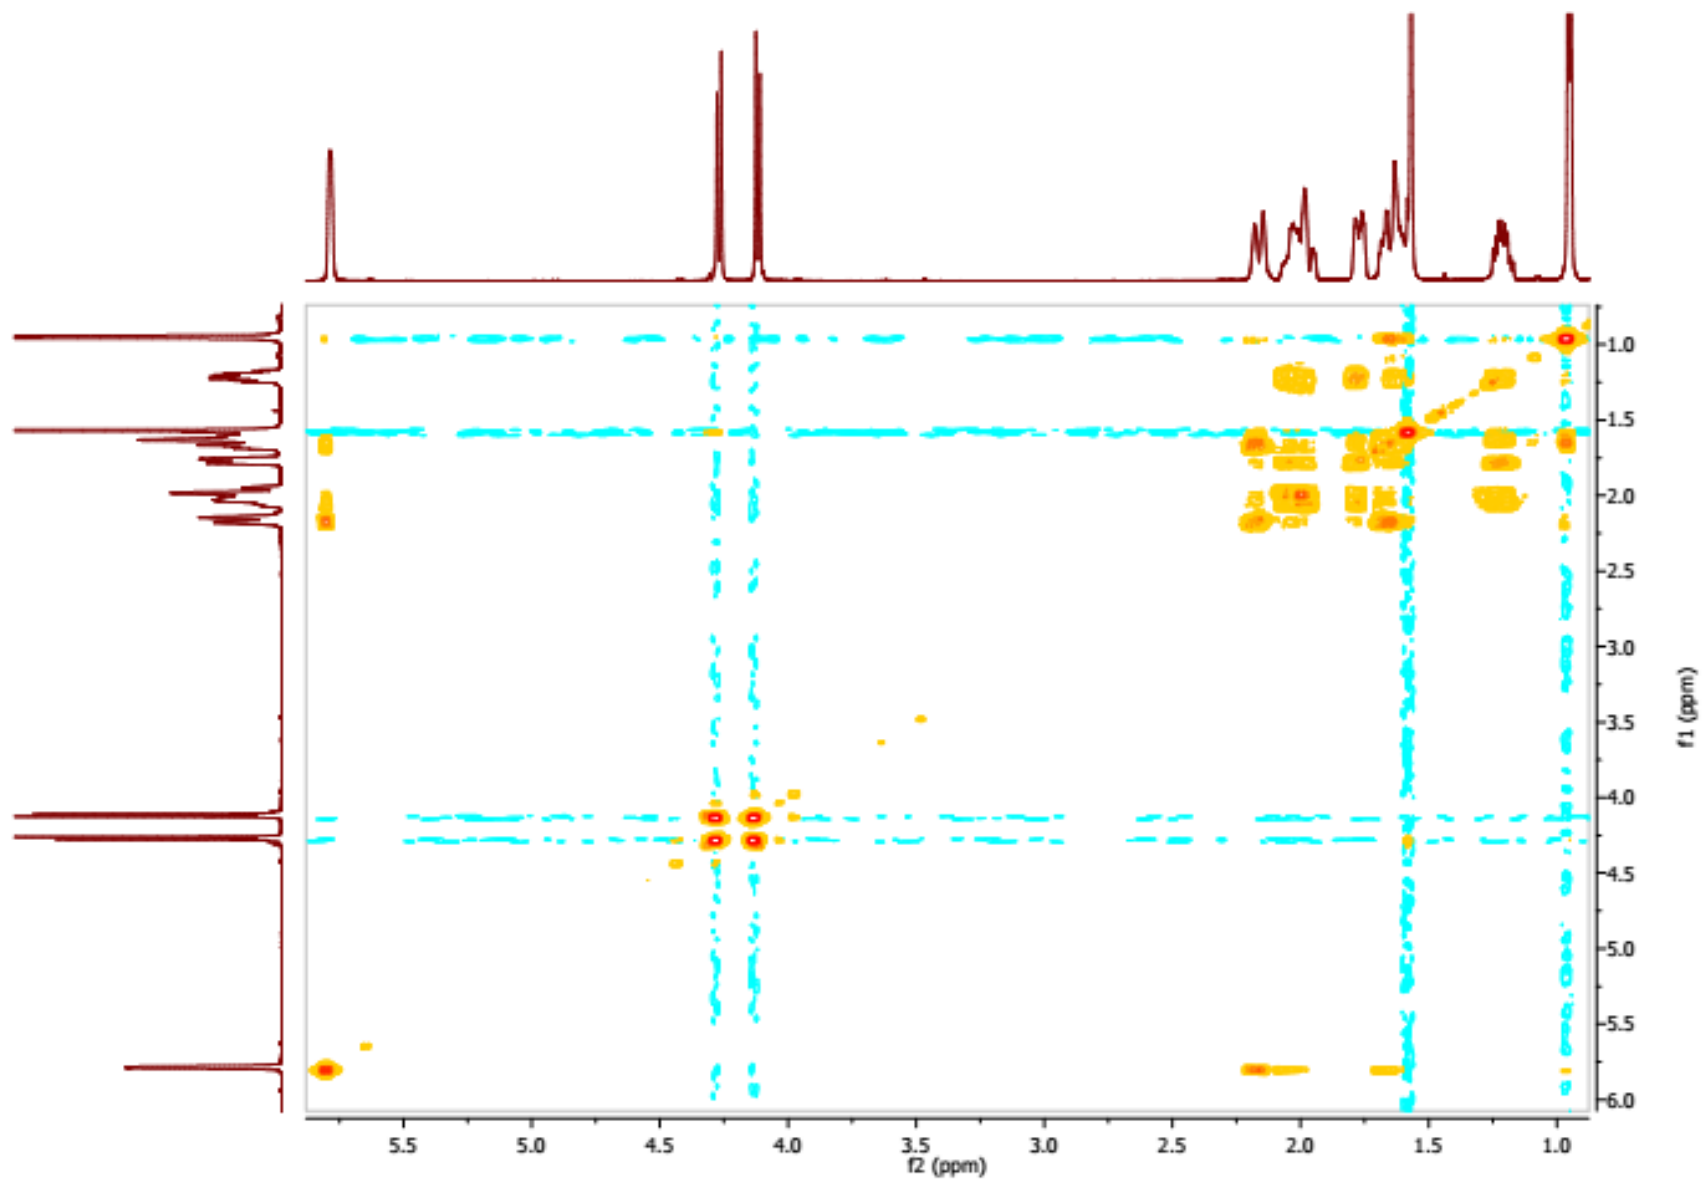

NOESY of compound **30**

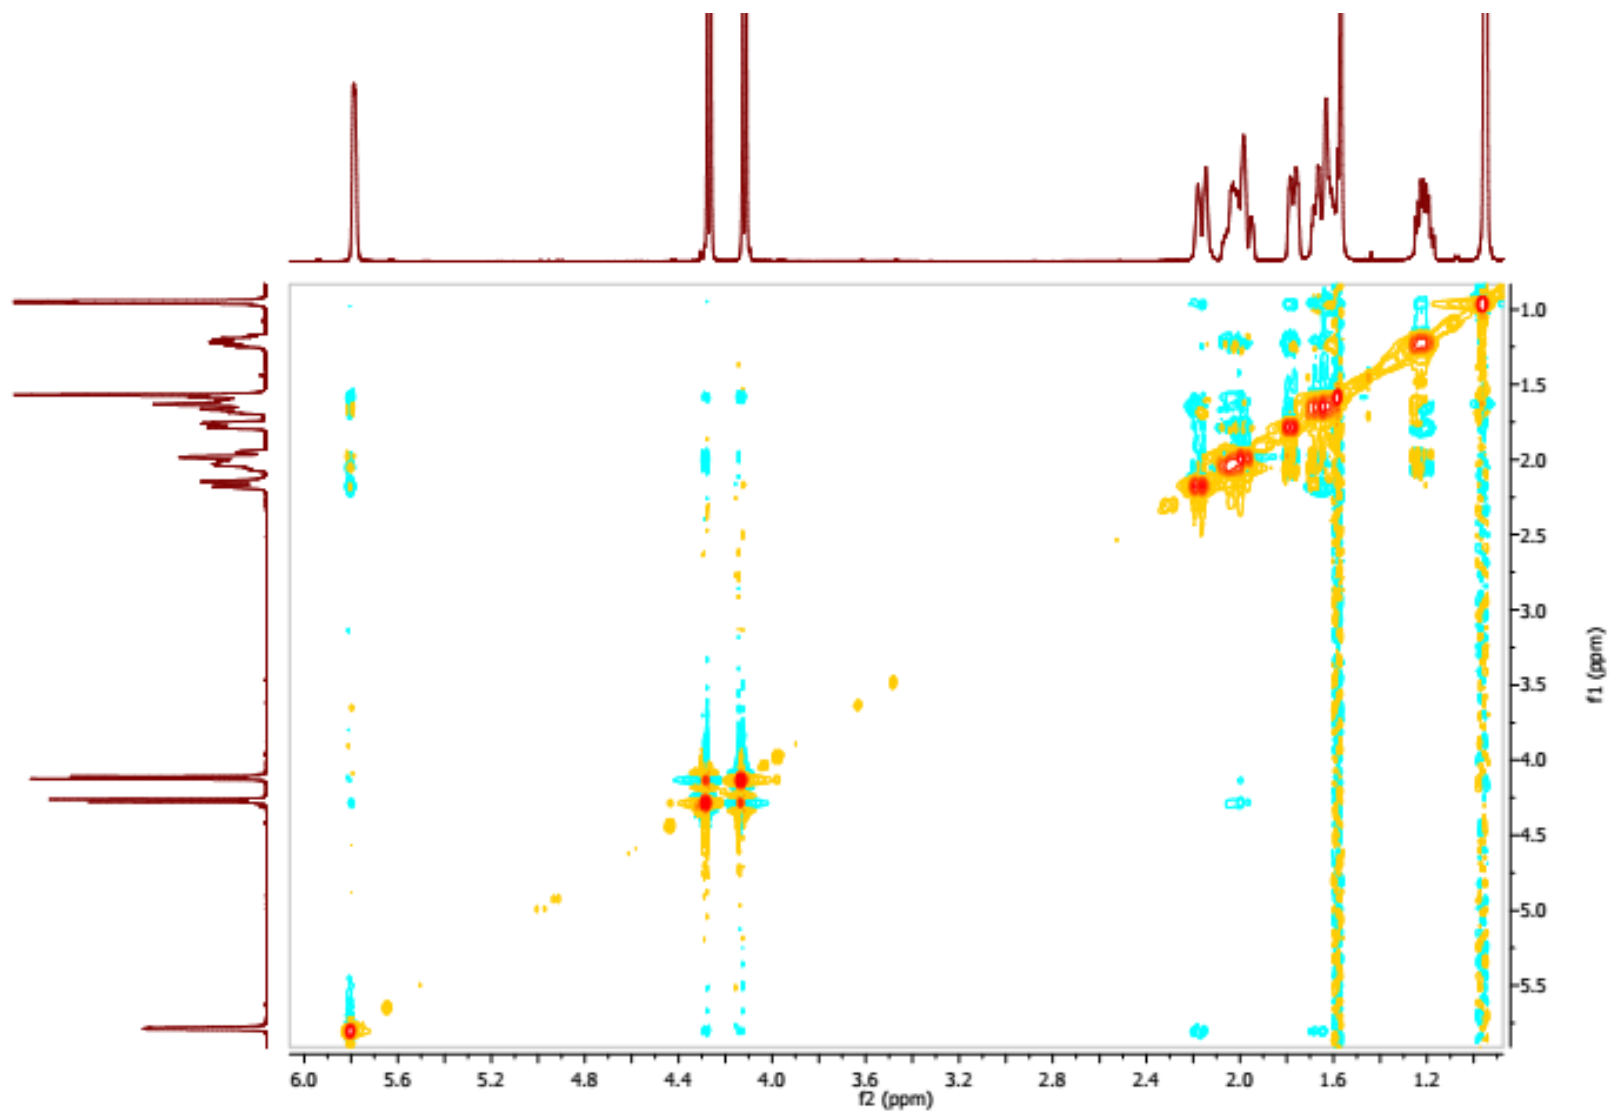

HSQC of compound **30**

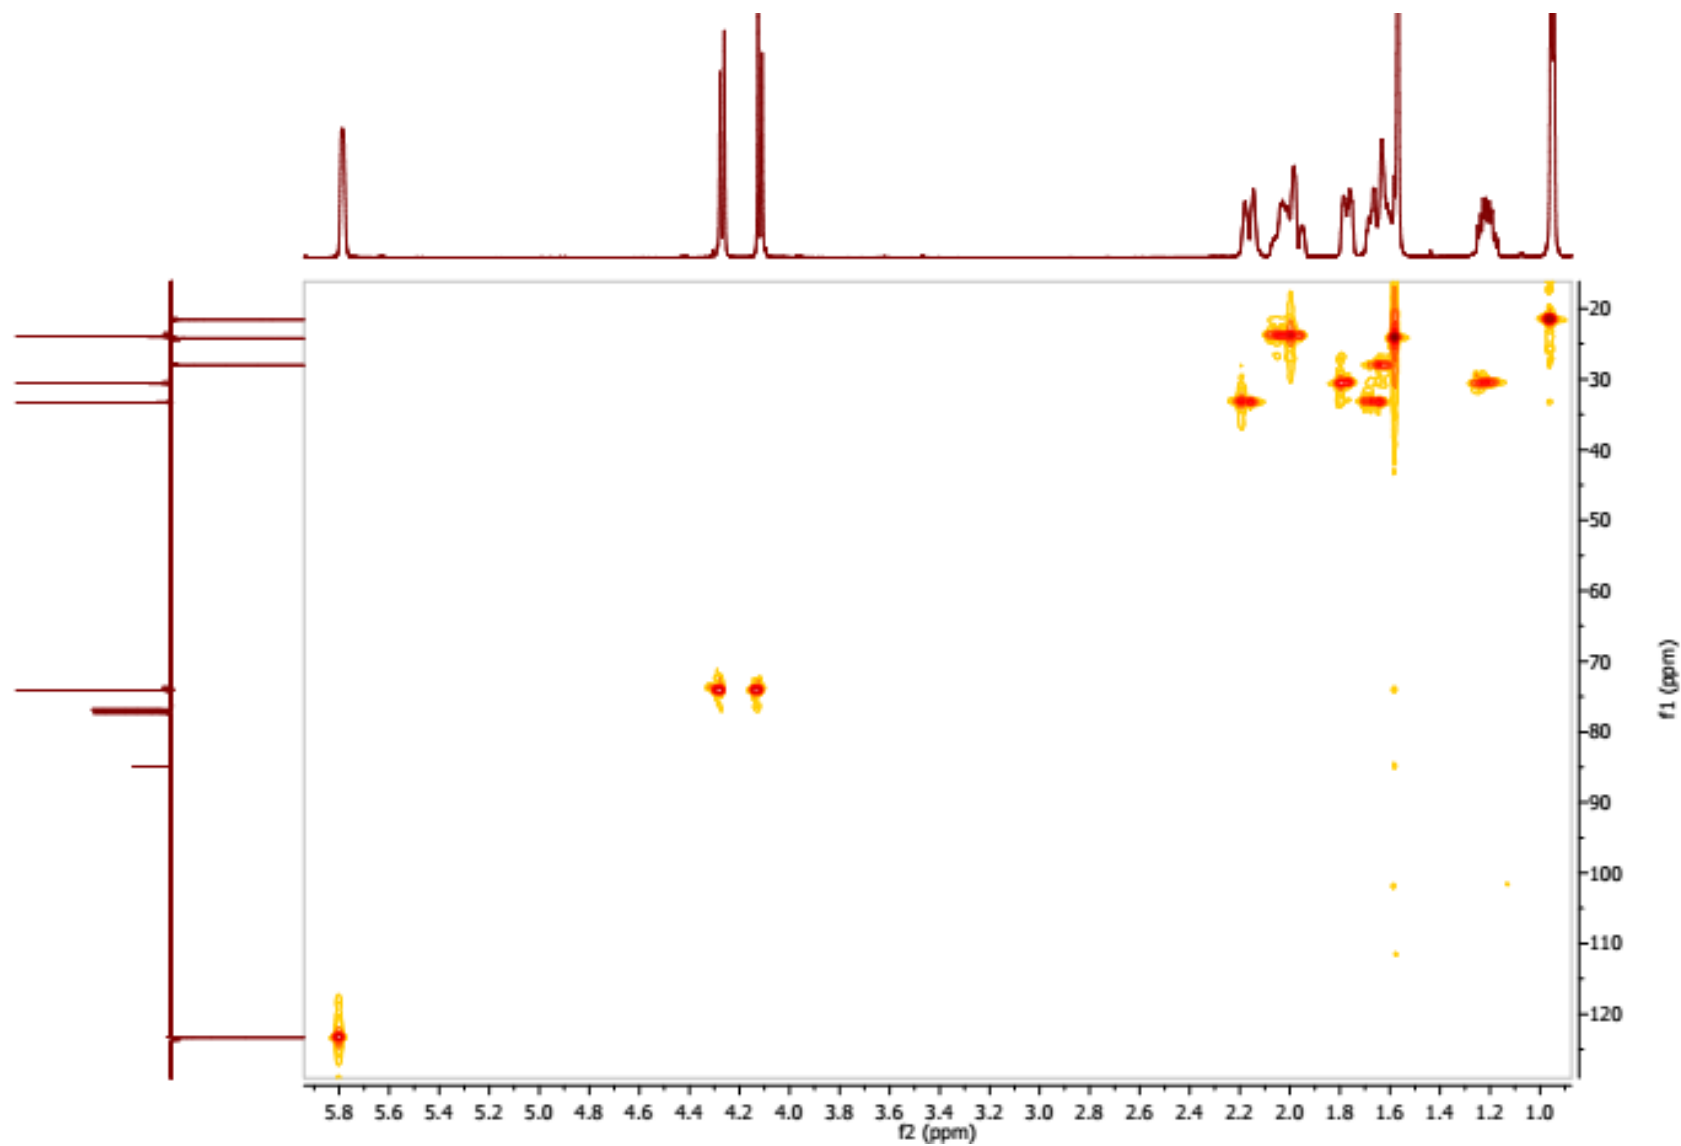

HMBC of compound 30

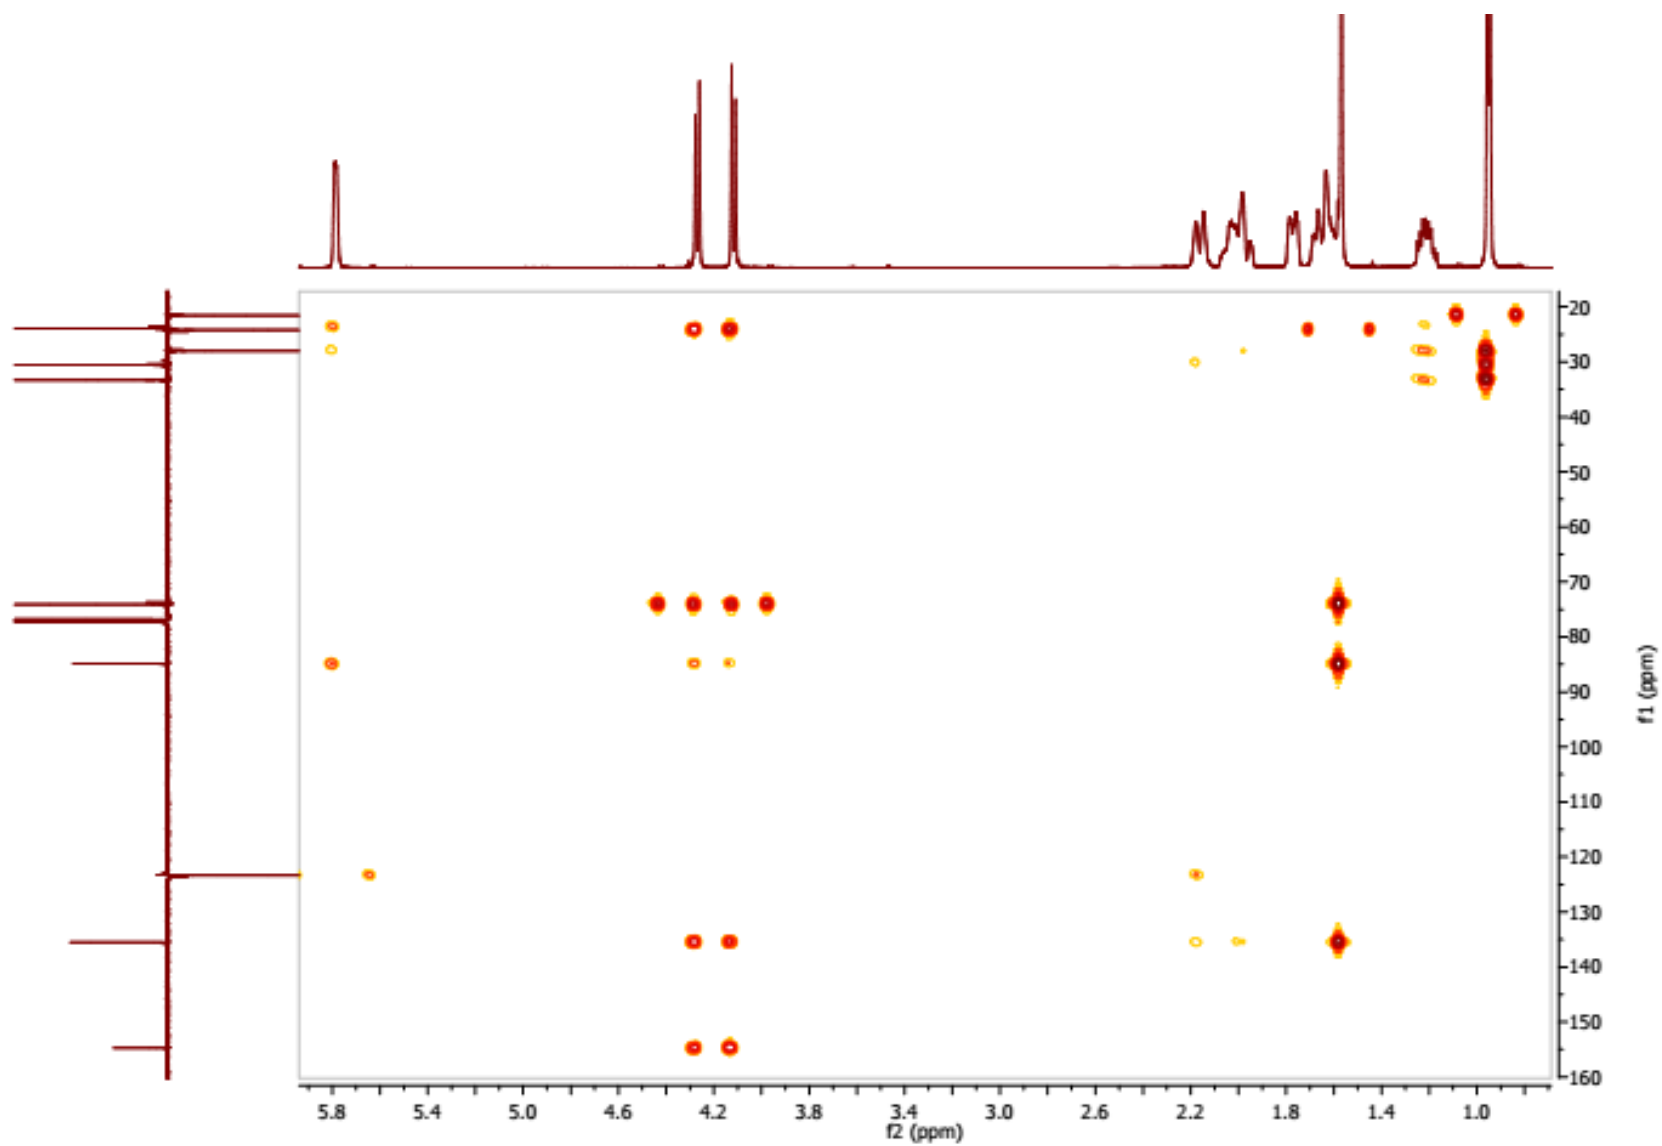

$^1\text{H-NMR}$  of compound **31**

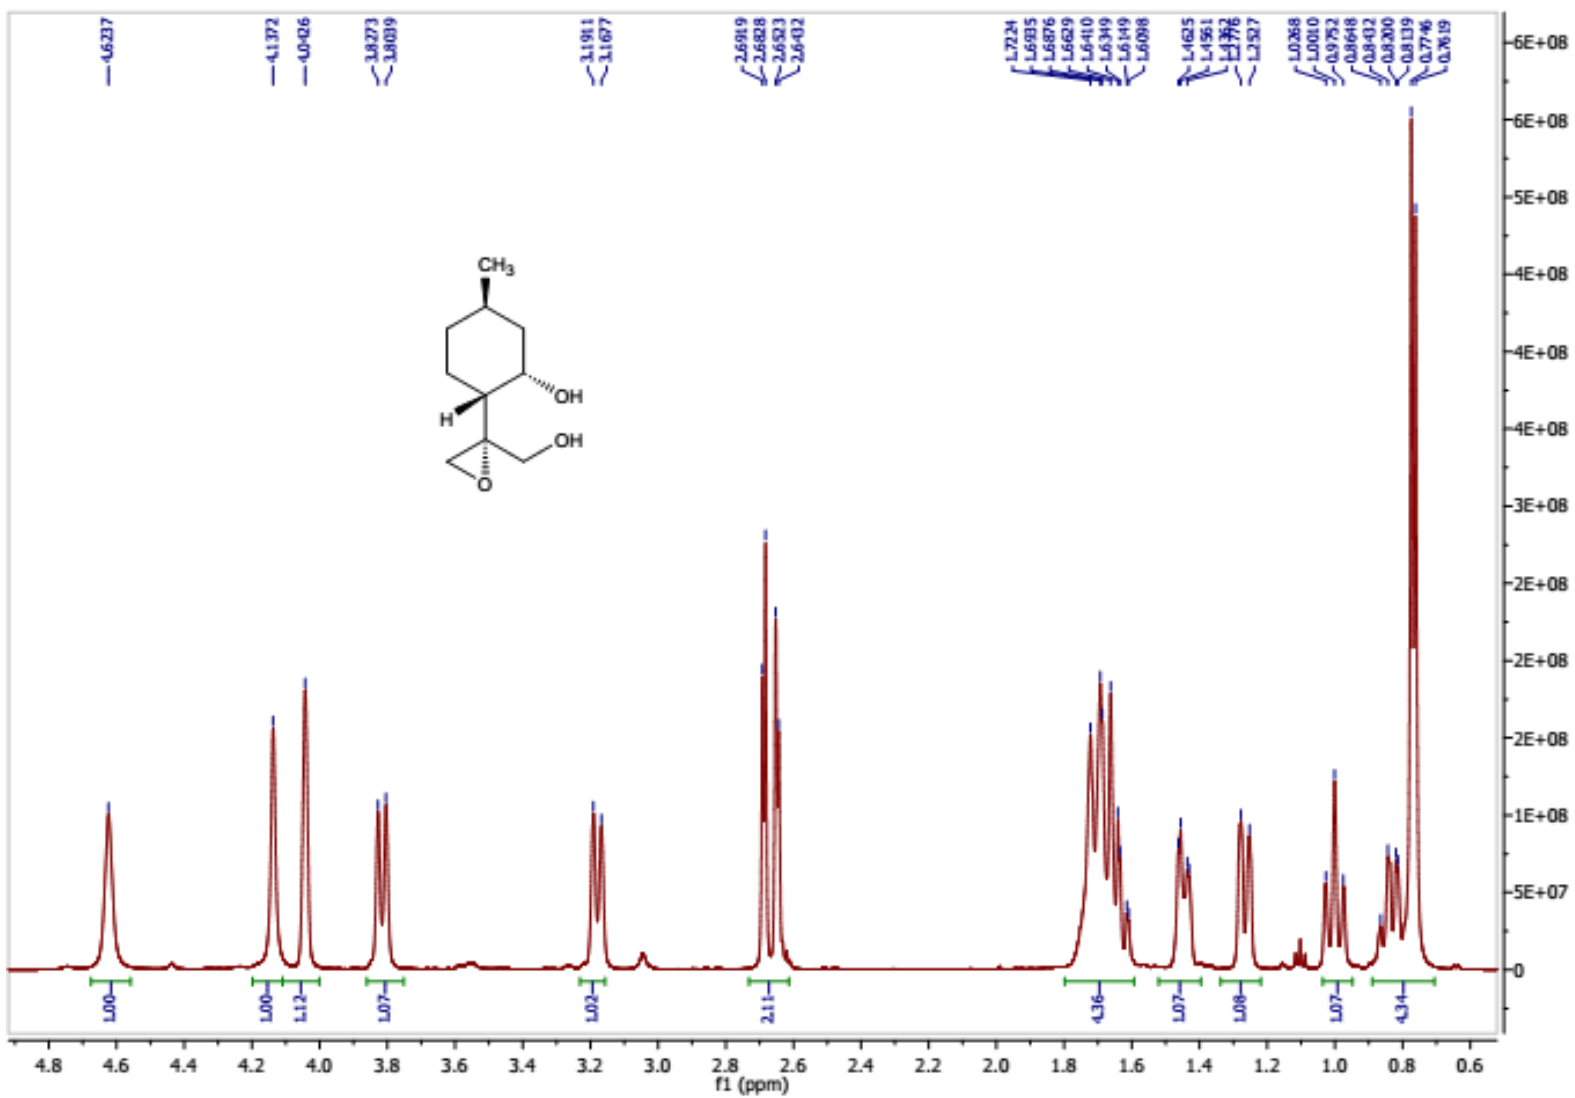



$^{13}\text{C}$ -NMR of compound **31**

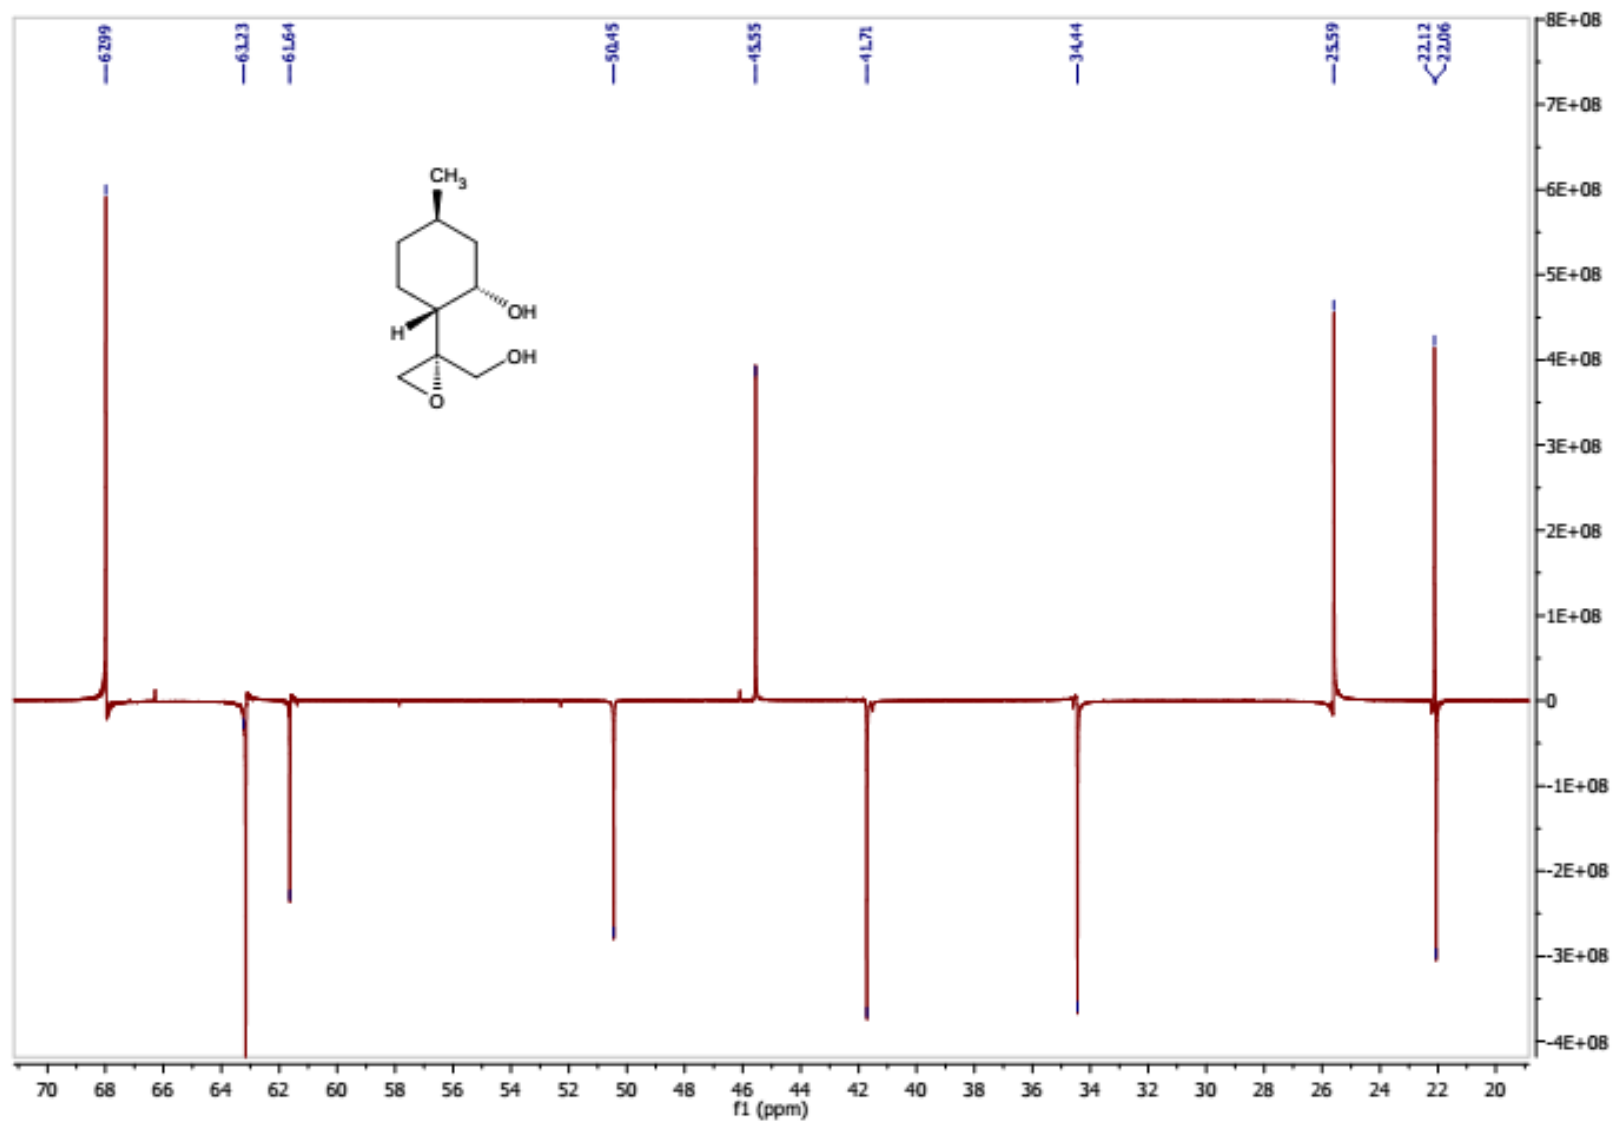

COSY of compound **31**

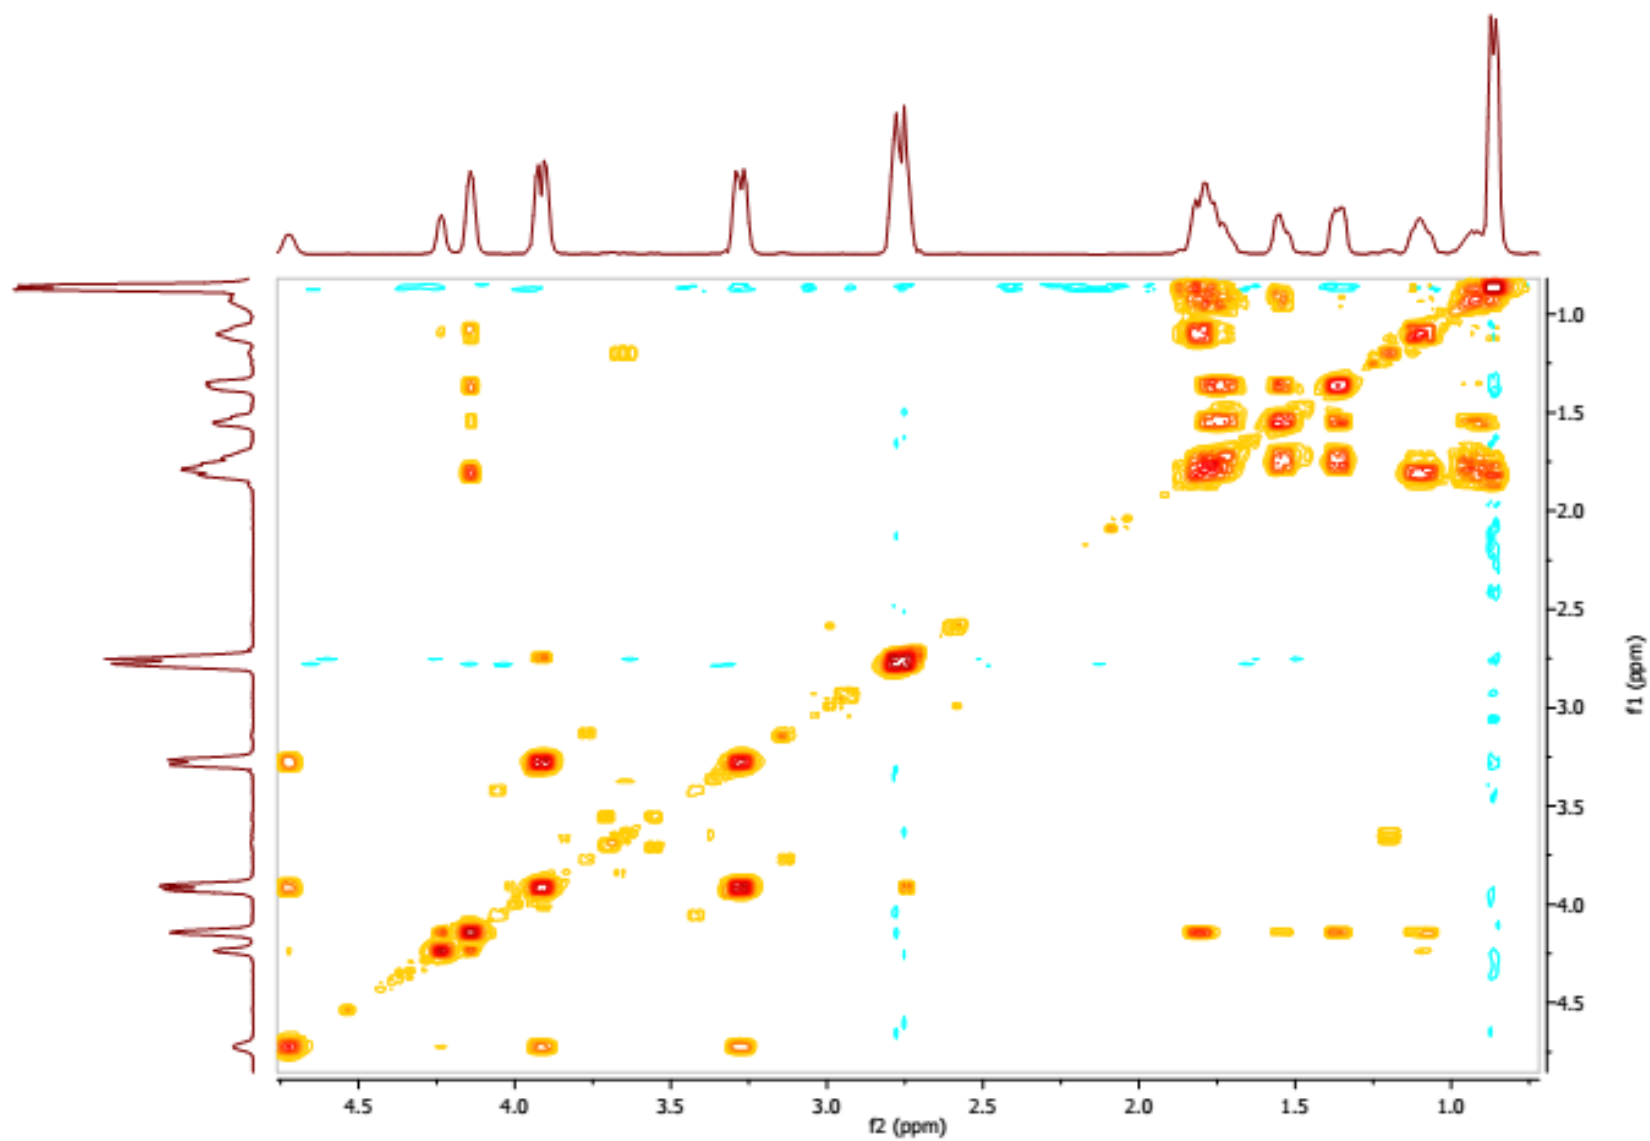

NOESY of compound **31**

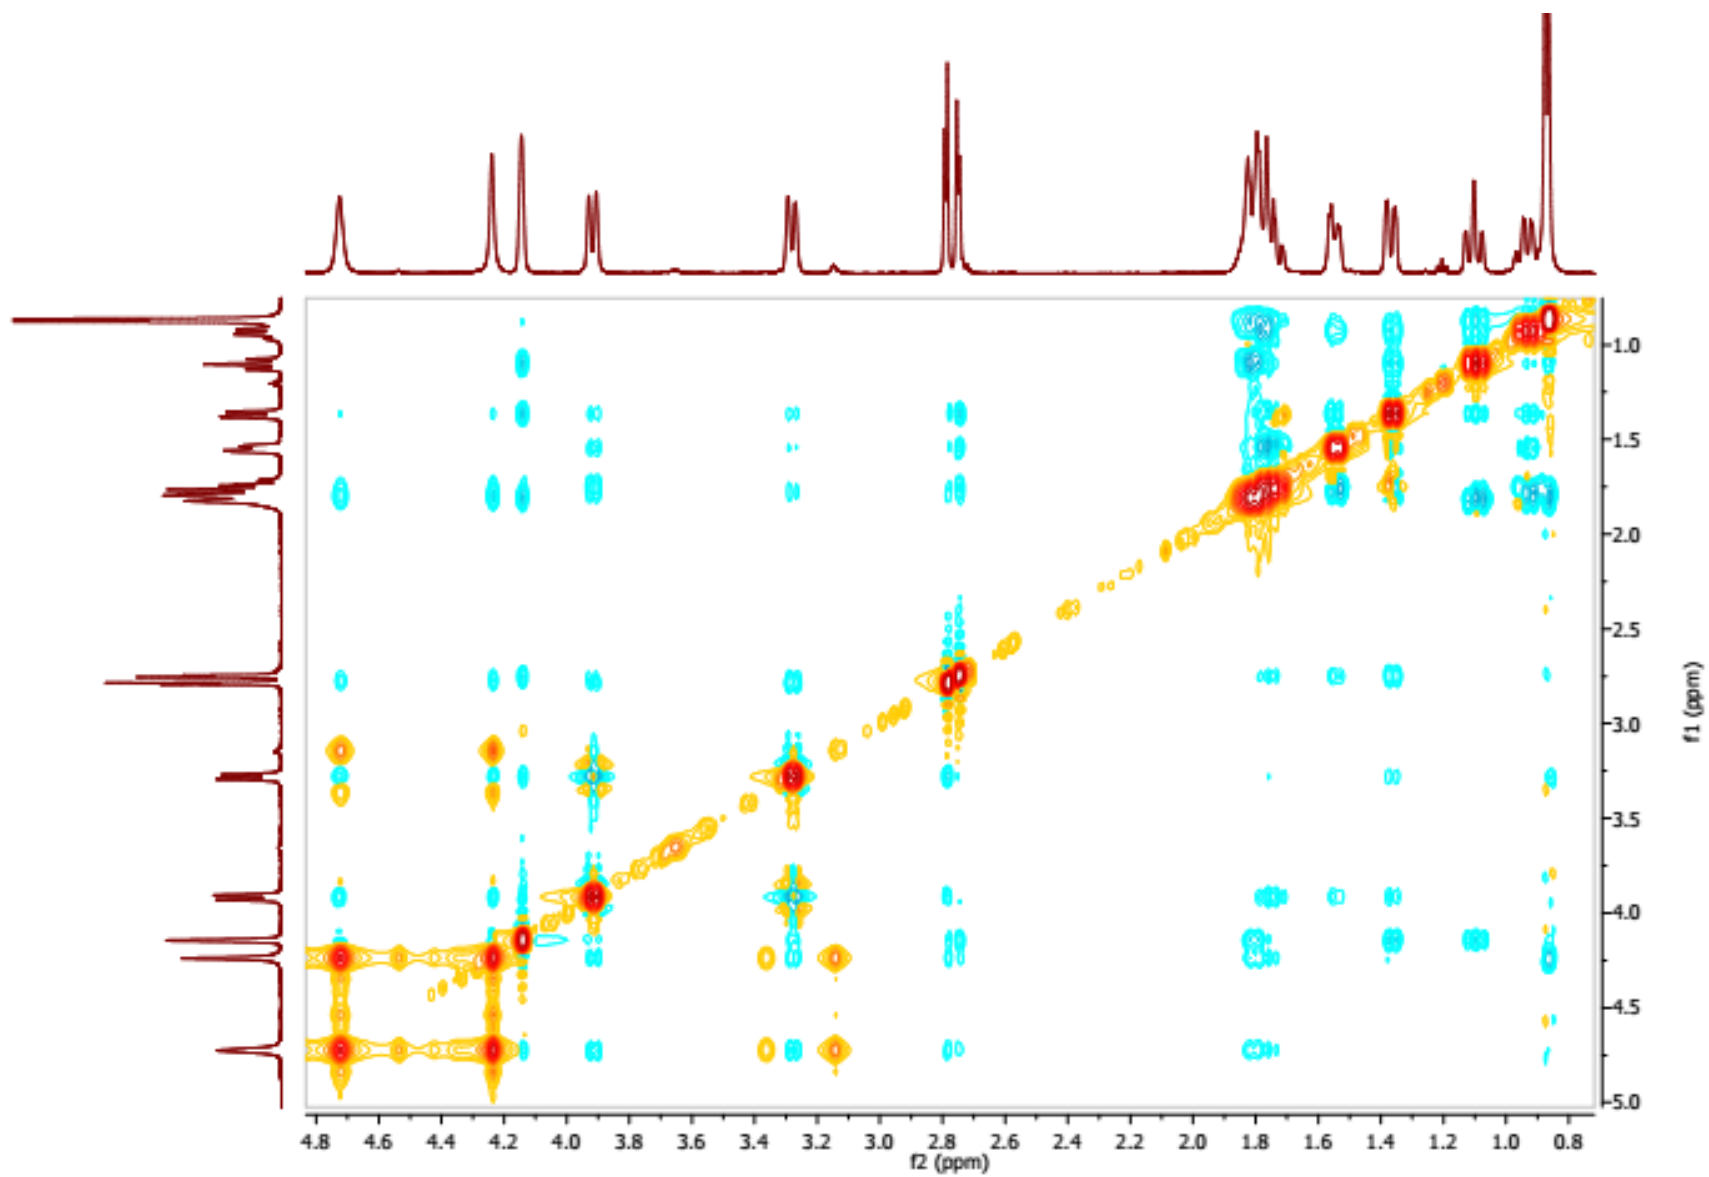

HSQC of compound **31**

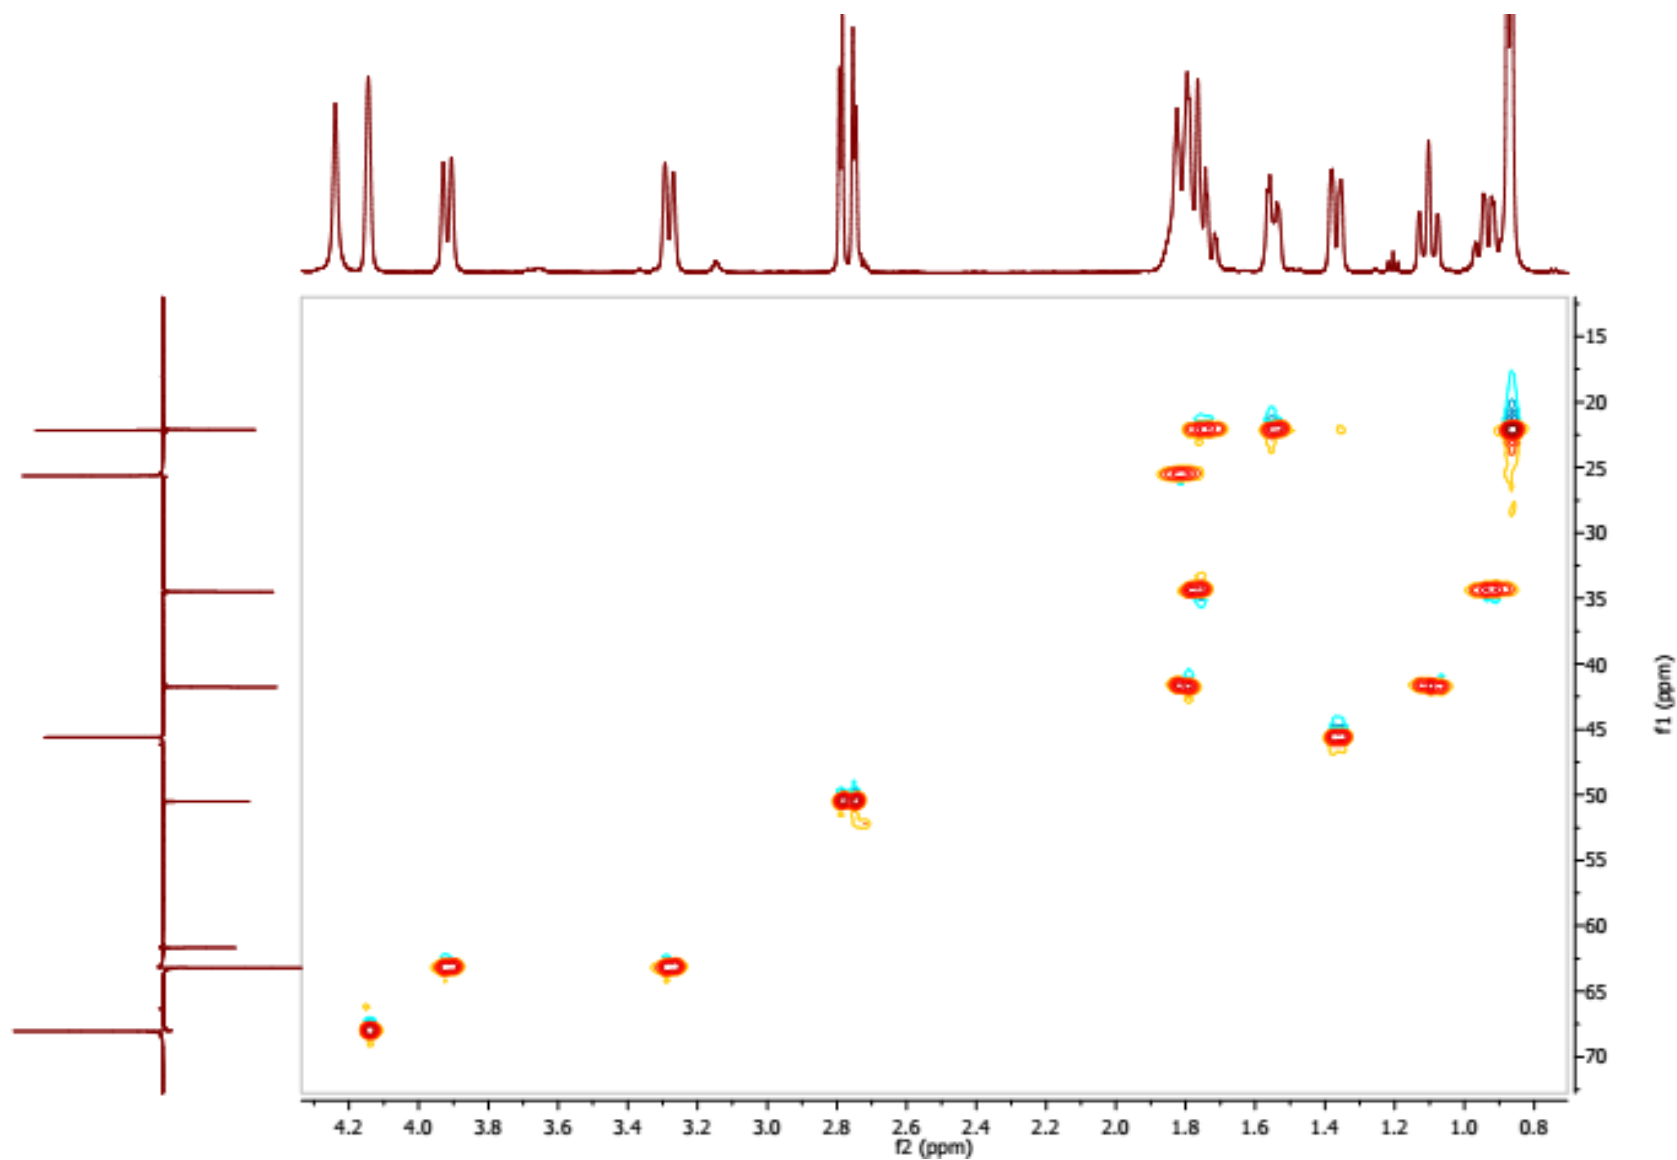

HMBC of compound 31

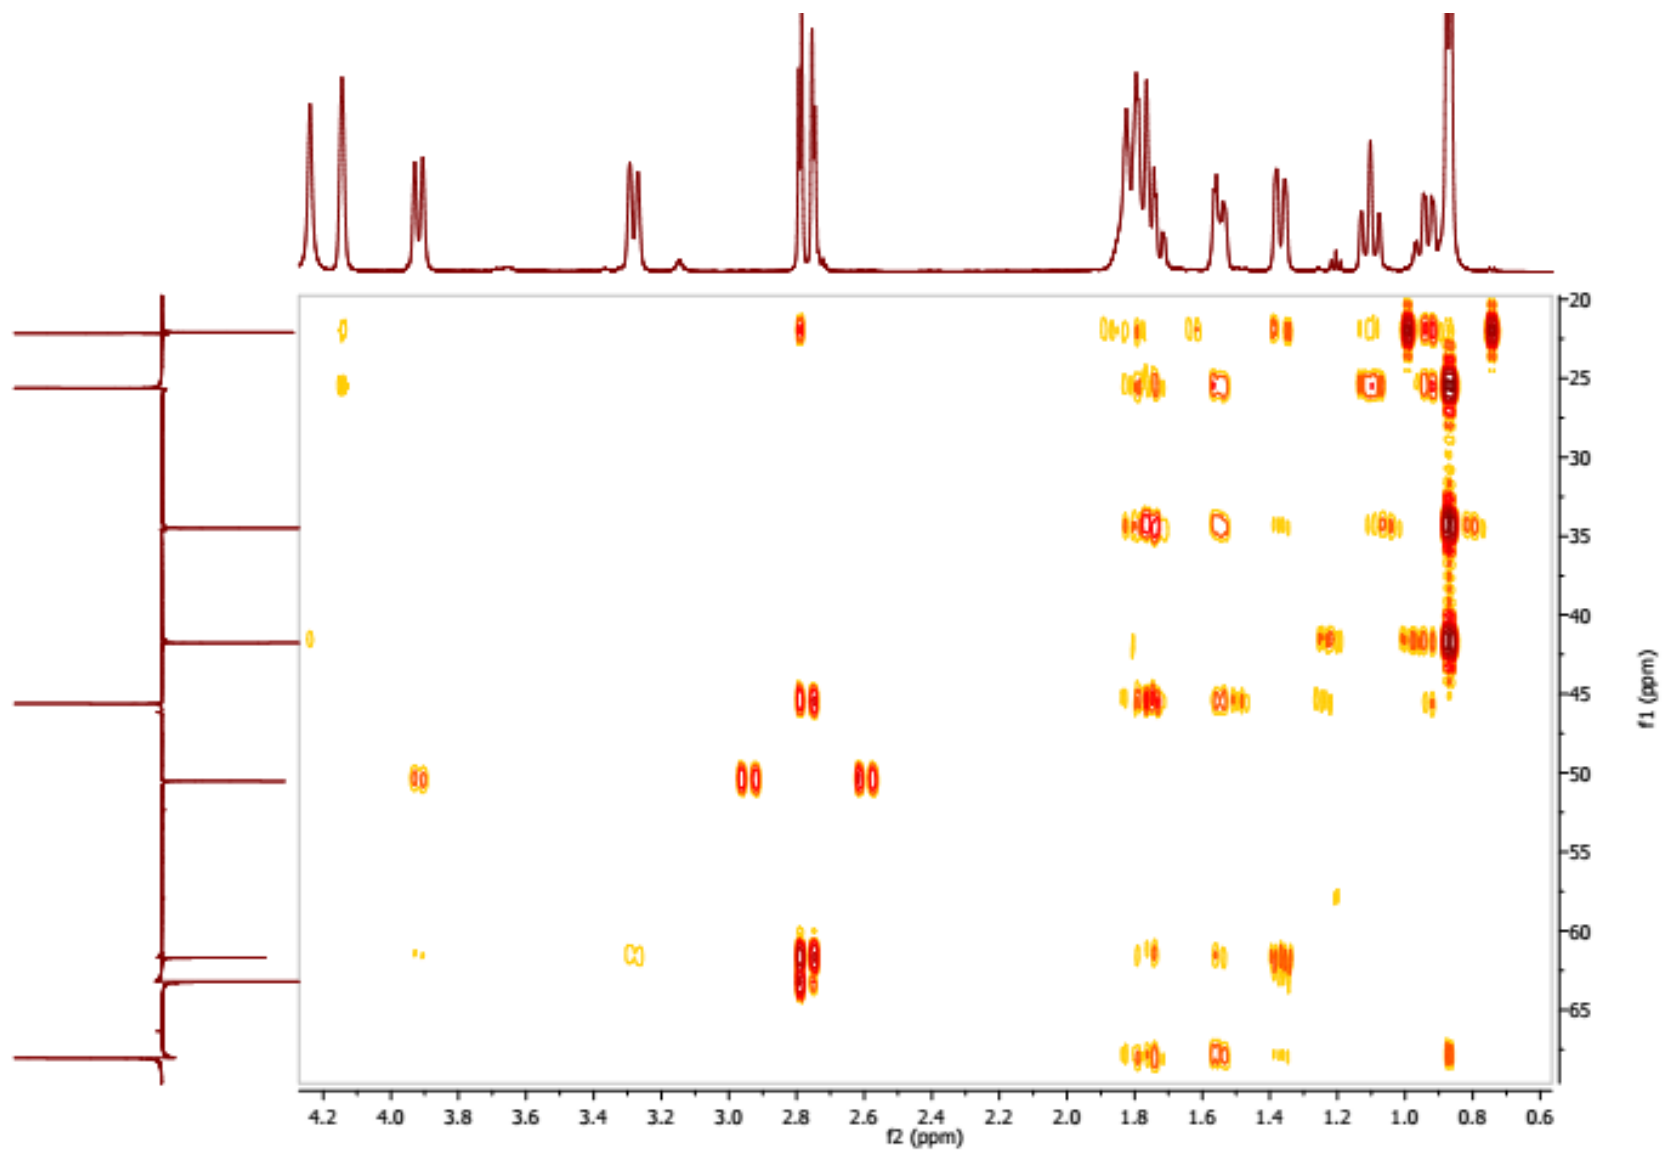

<sup>1</sup>H-NMR of compound 32

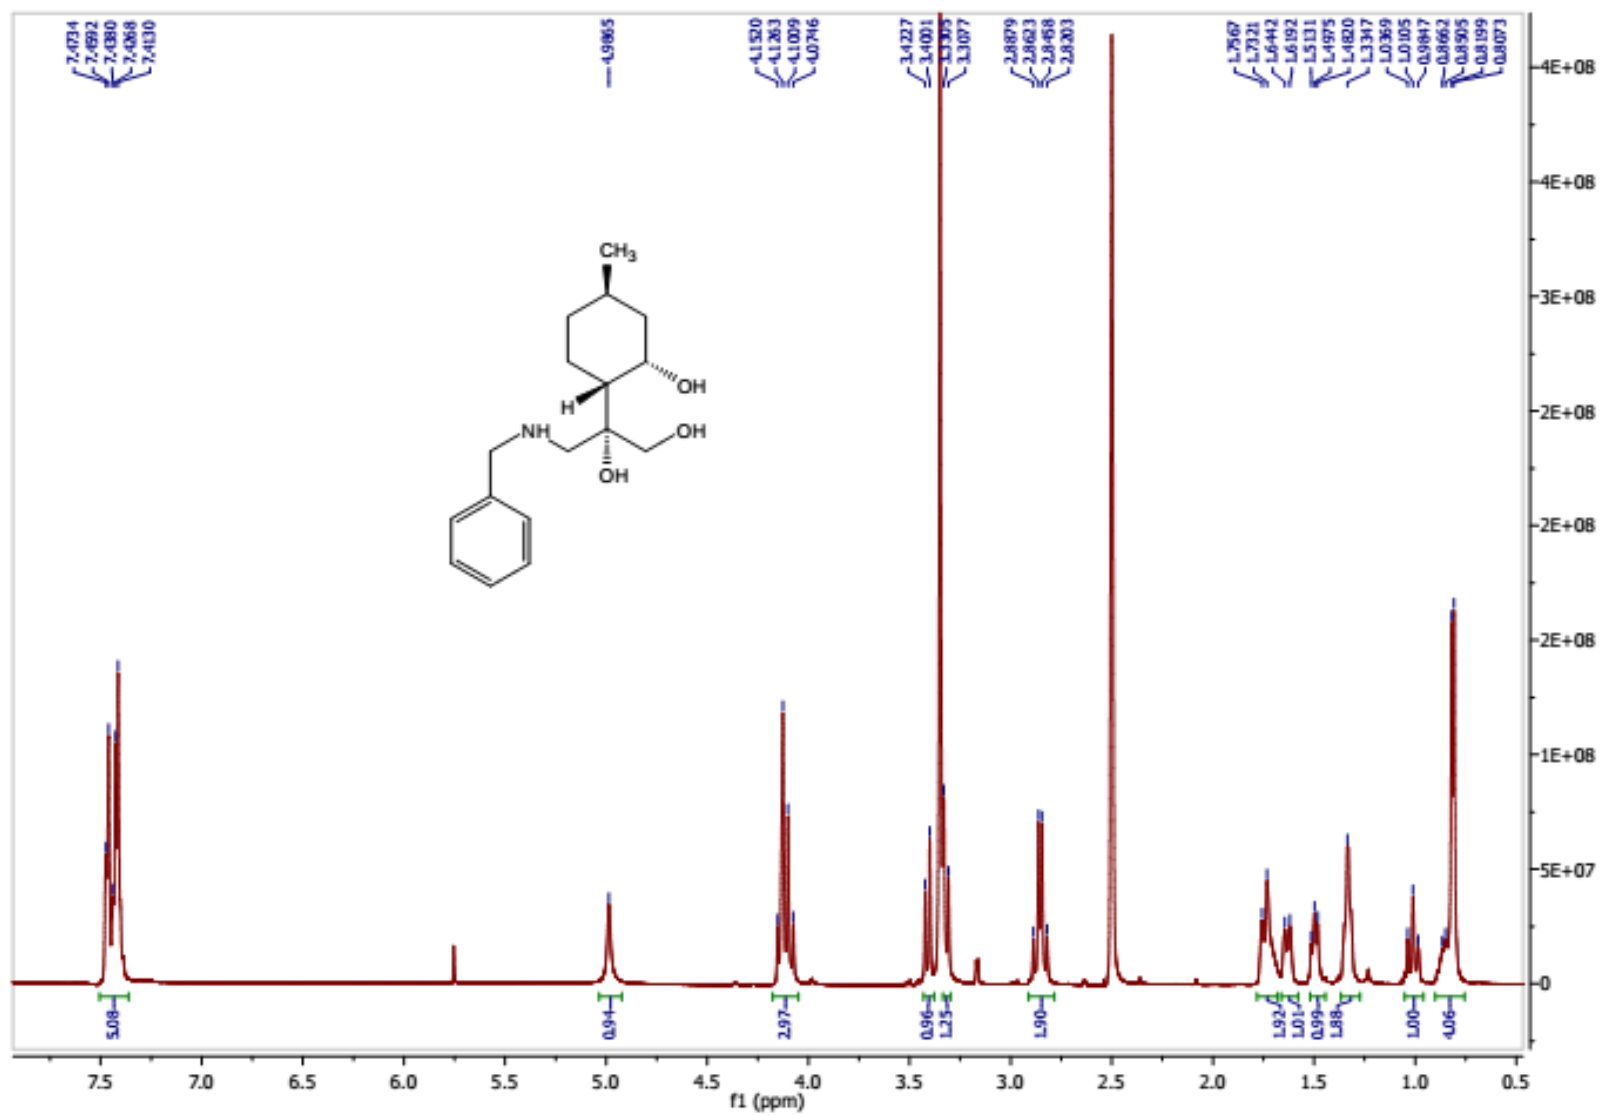

$^{13}\text{C}$ -NMR of compound 32

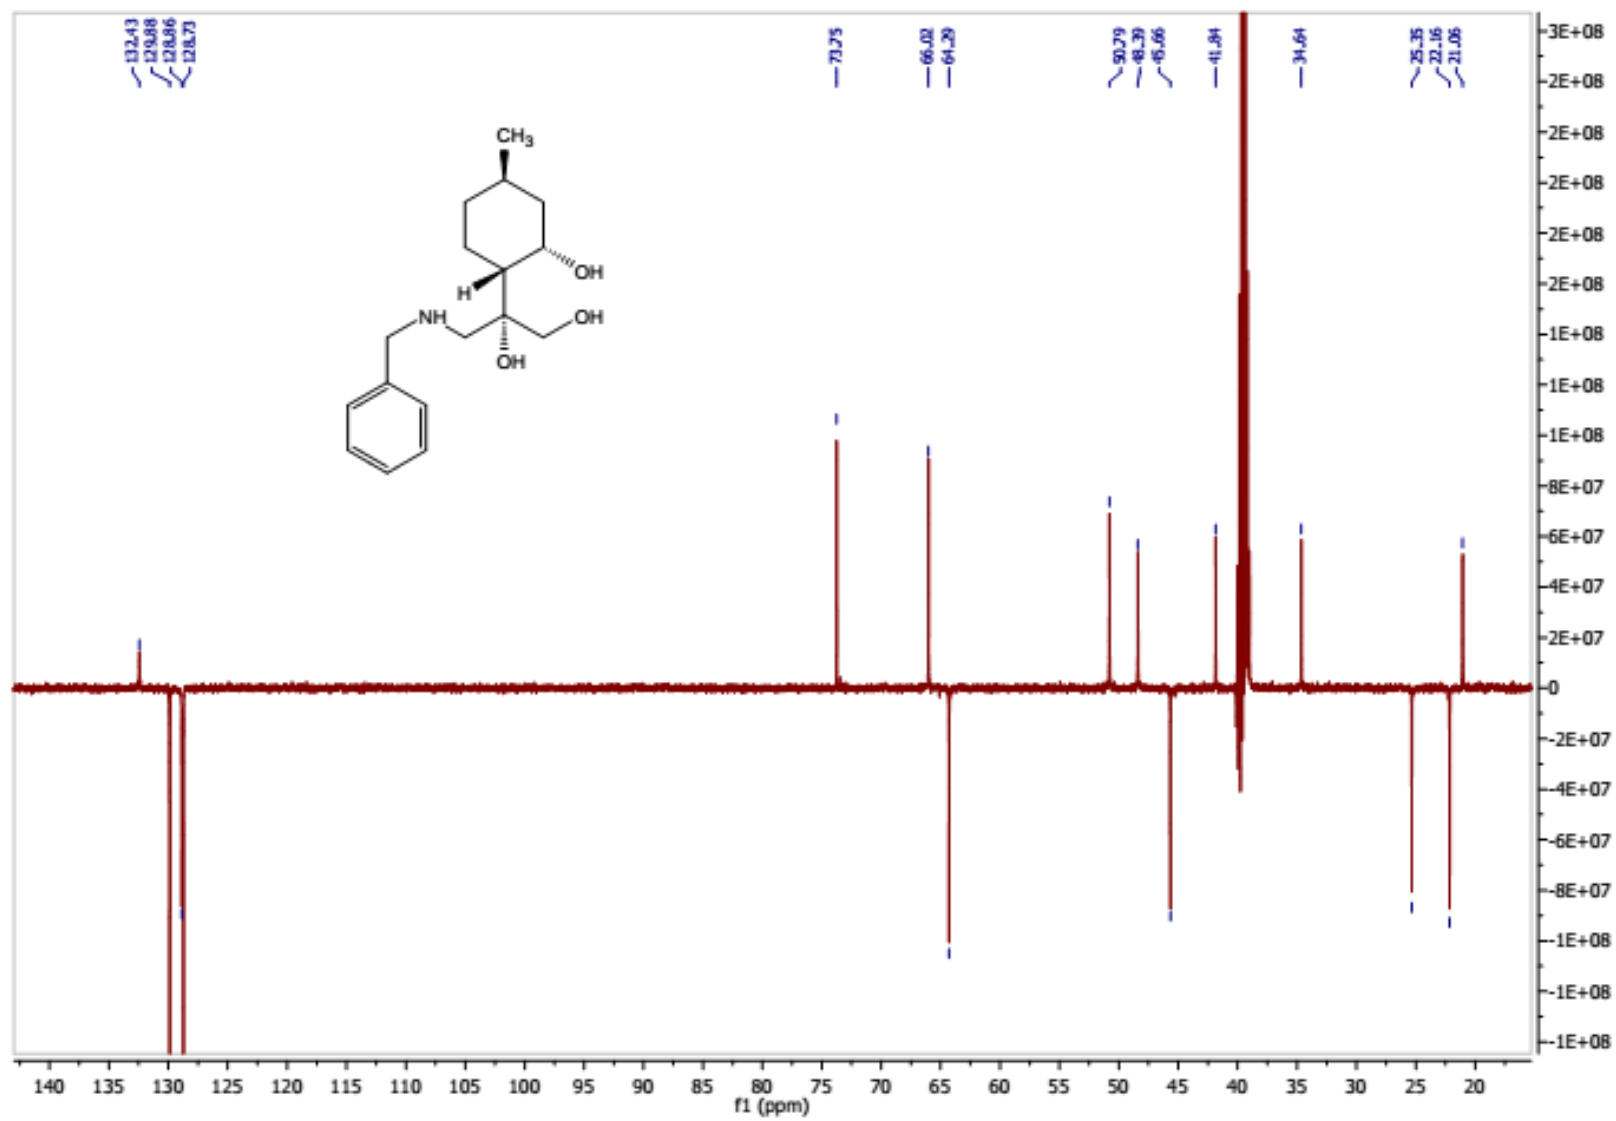

COSY of compound 32

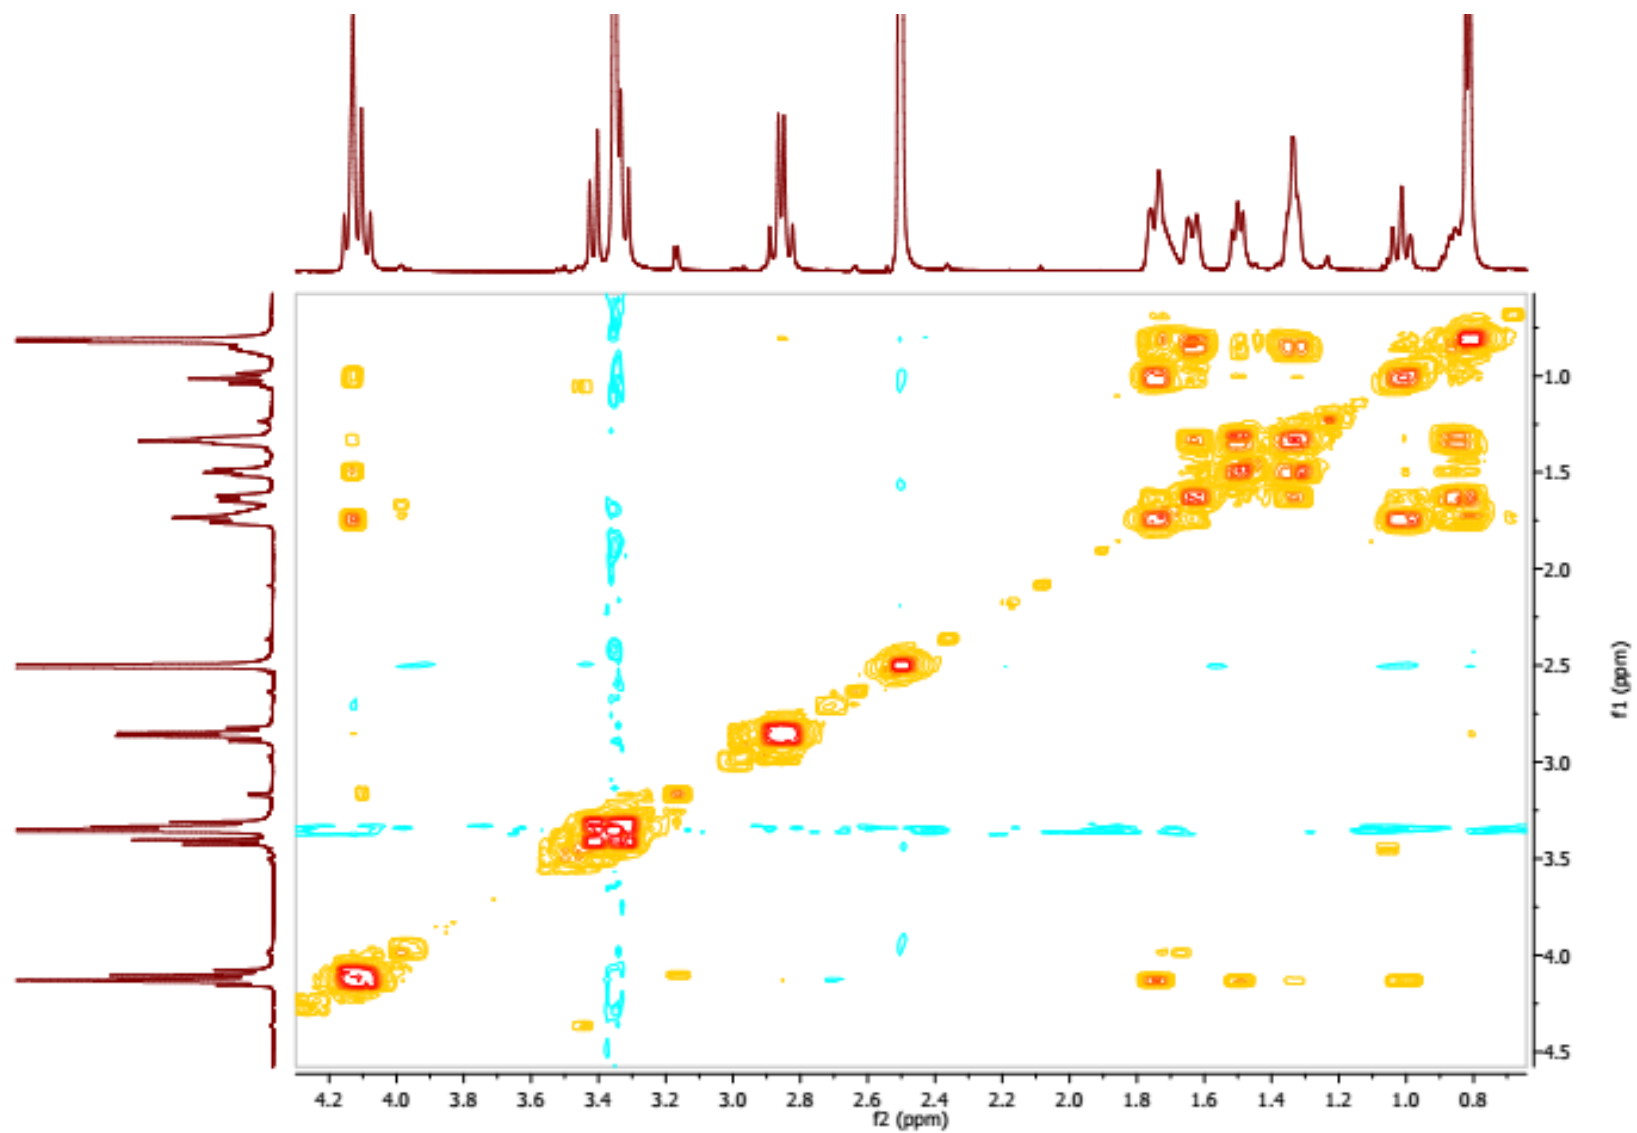



NOESY of compound 32

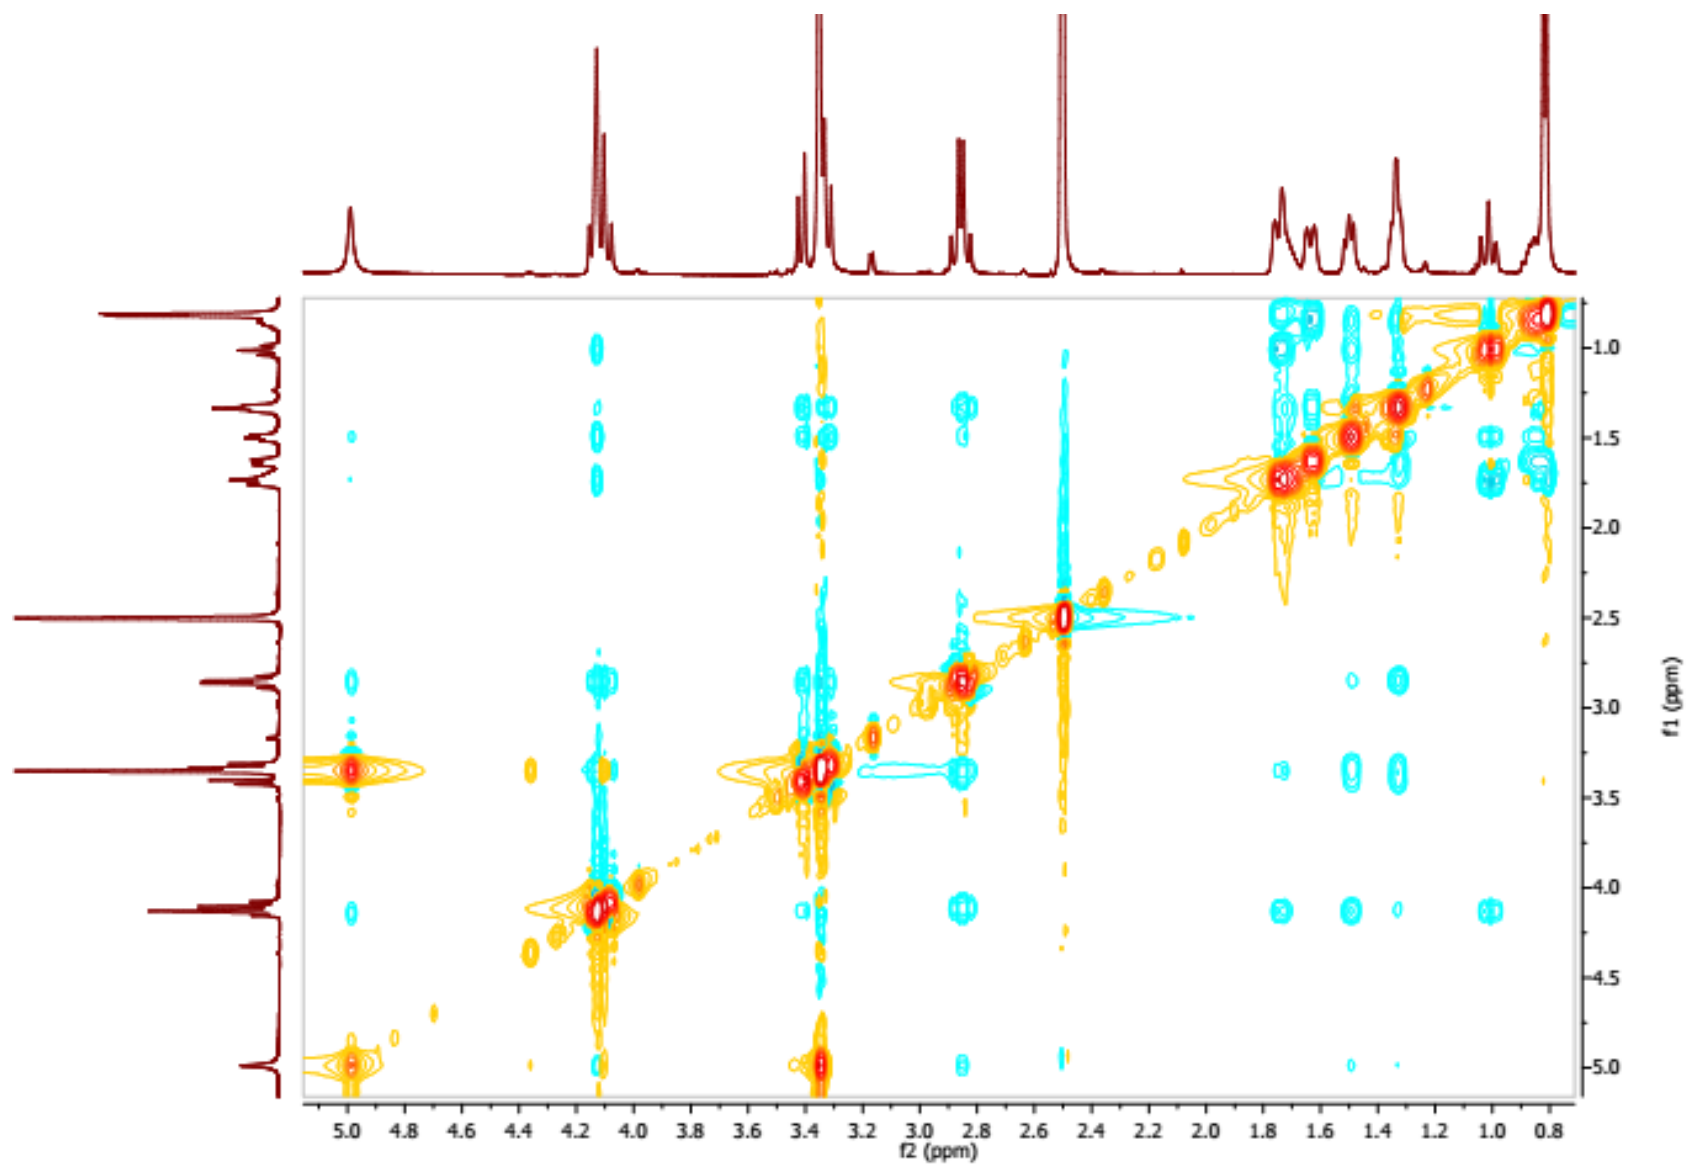

HSQC of compound 32

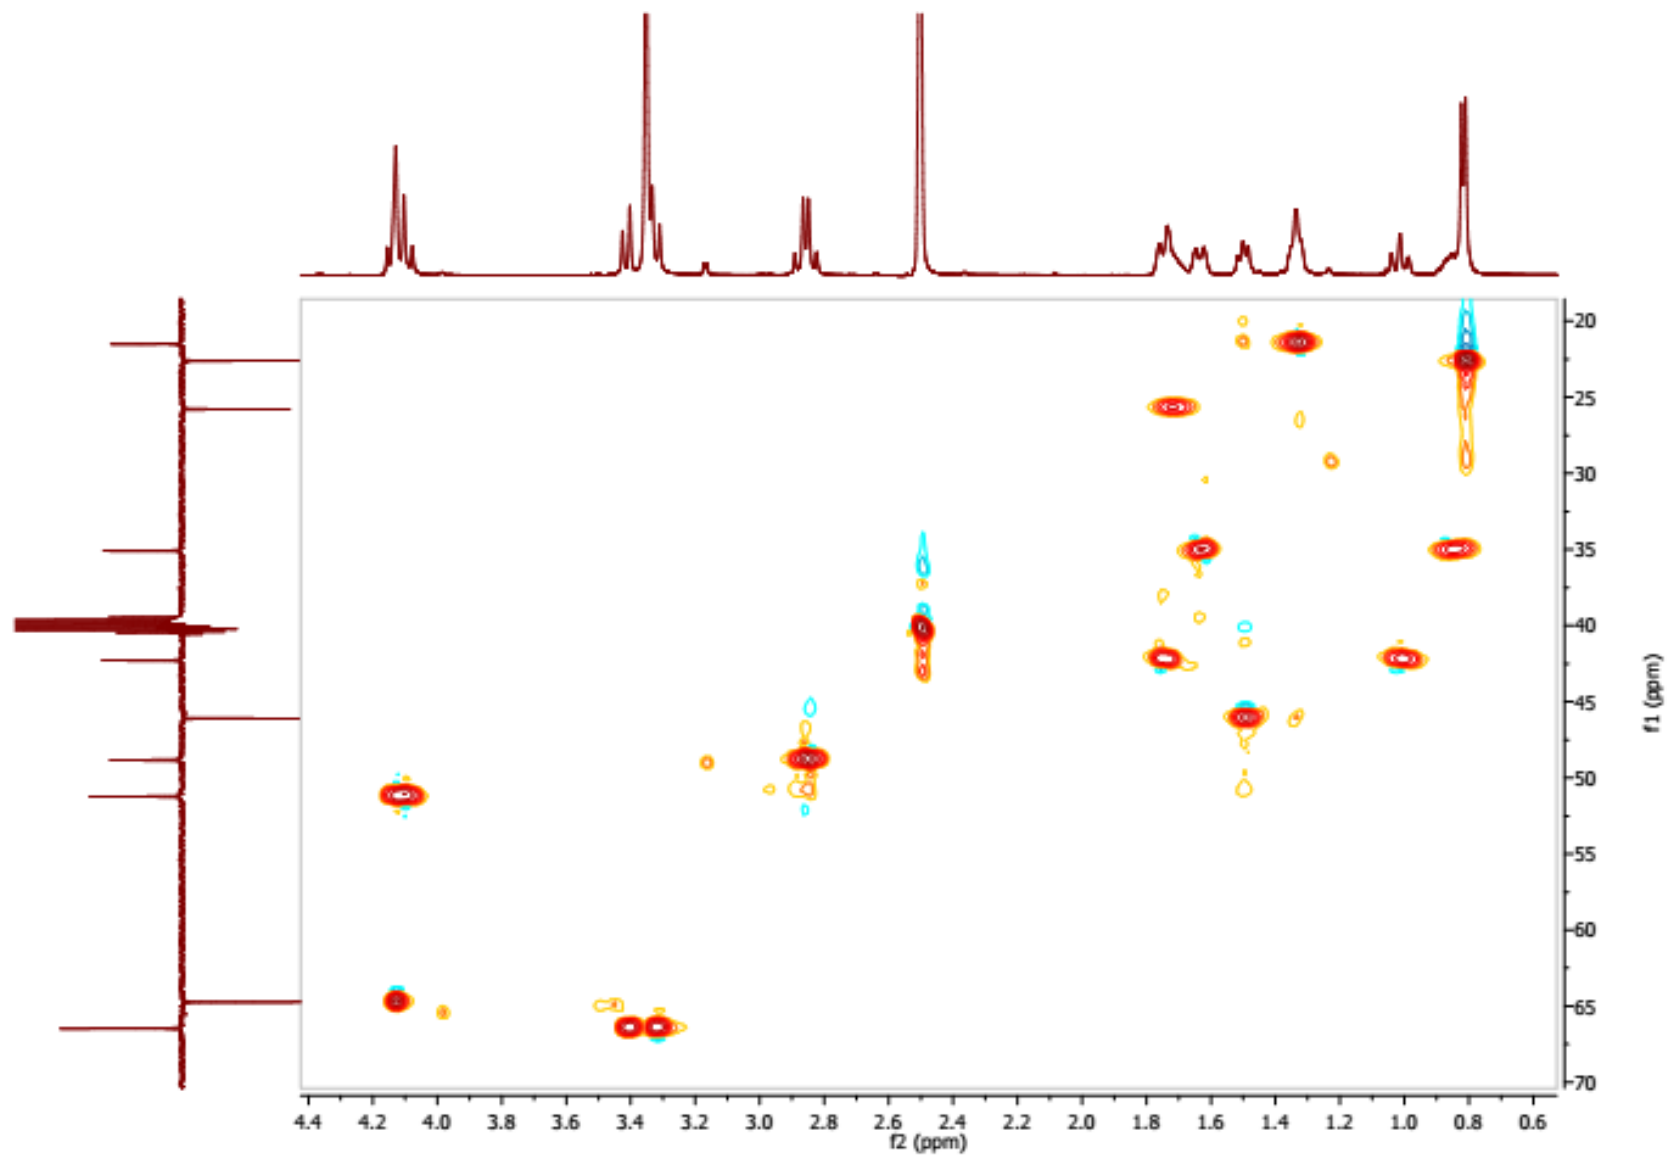

HMBC of compound 32

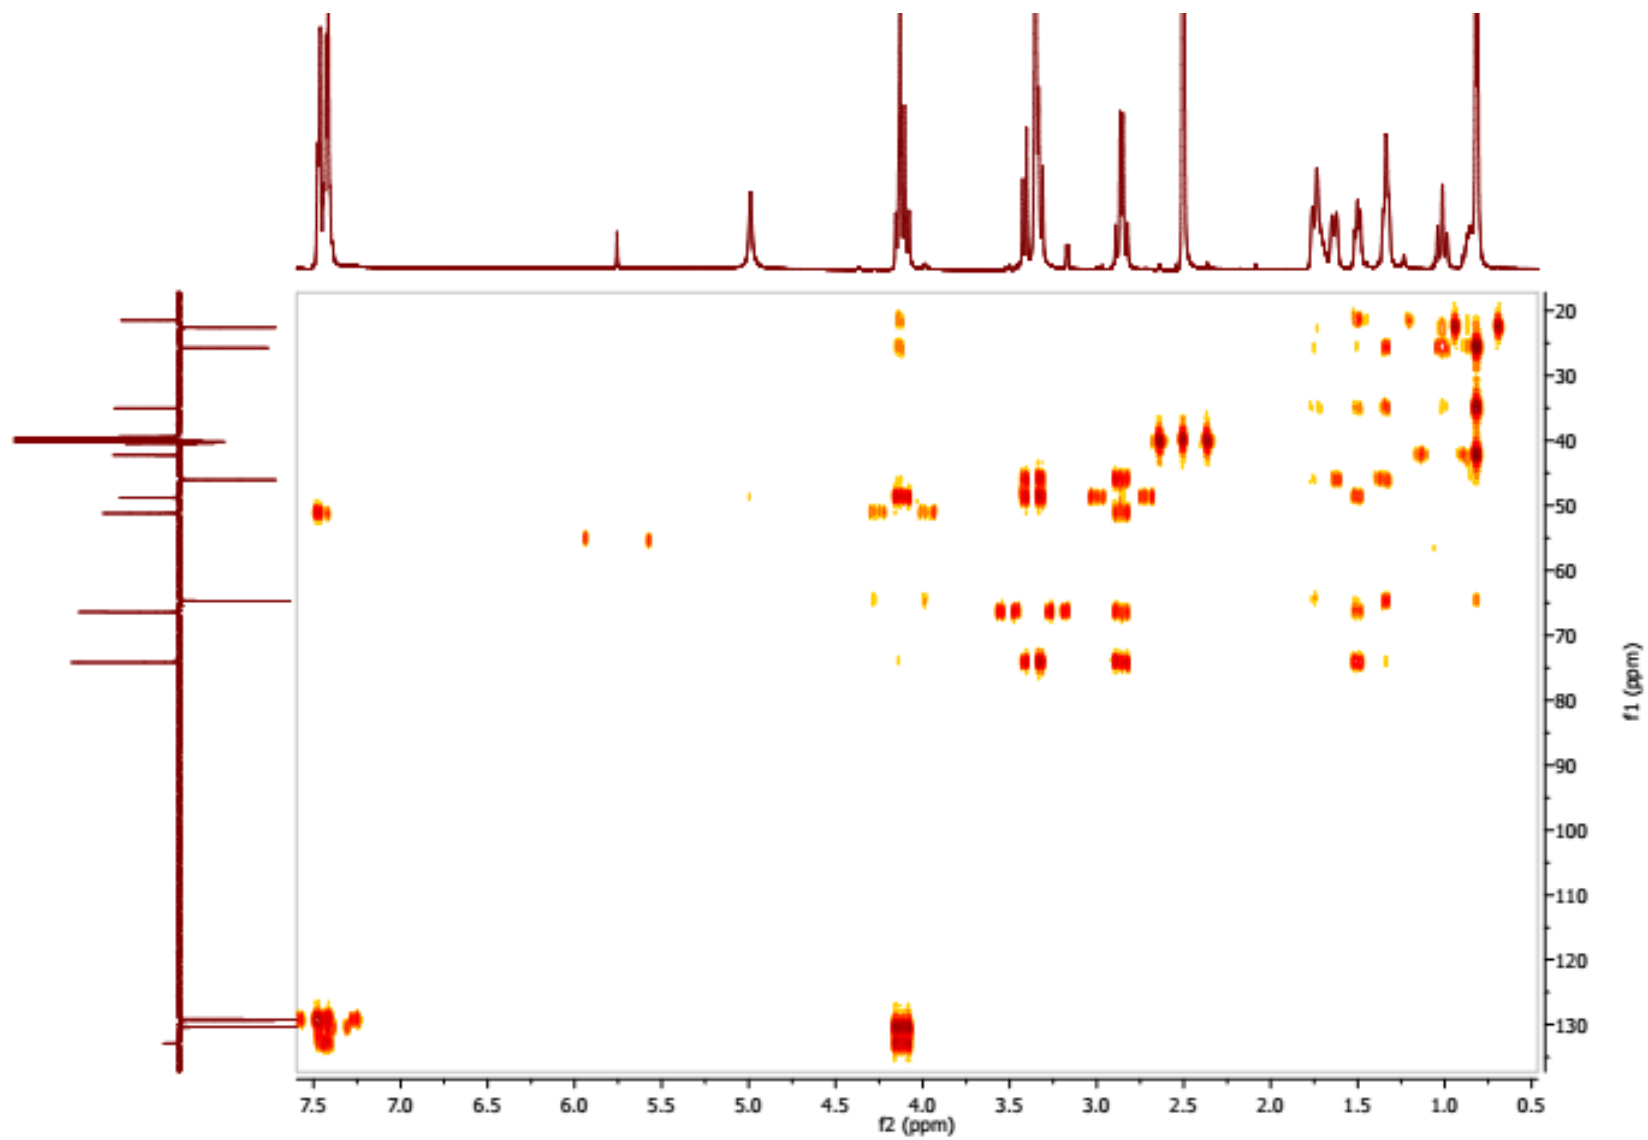

$^1\text{H-NMR}$  of compound **33**

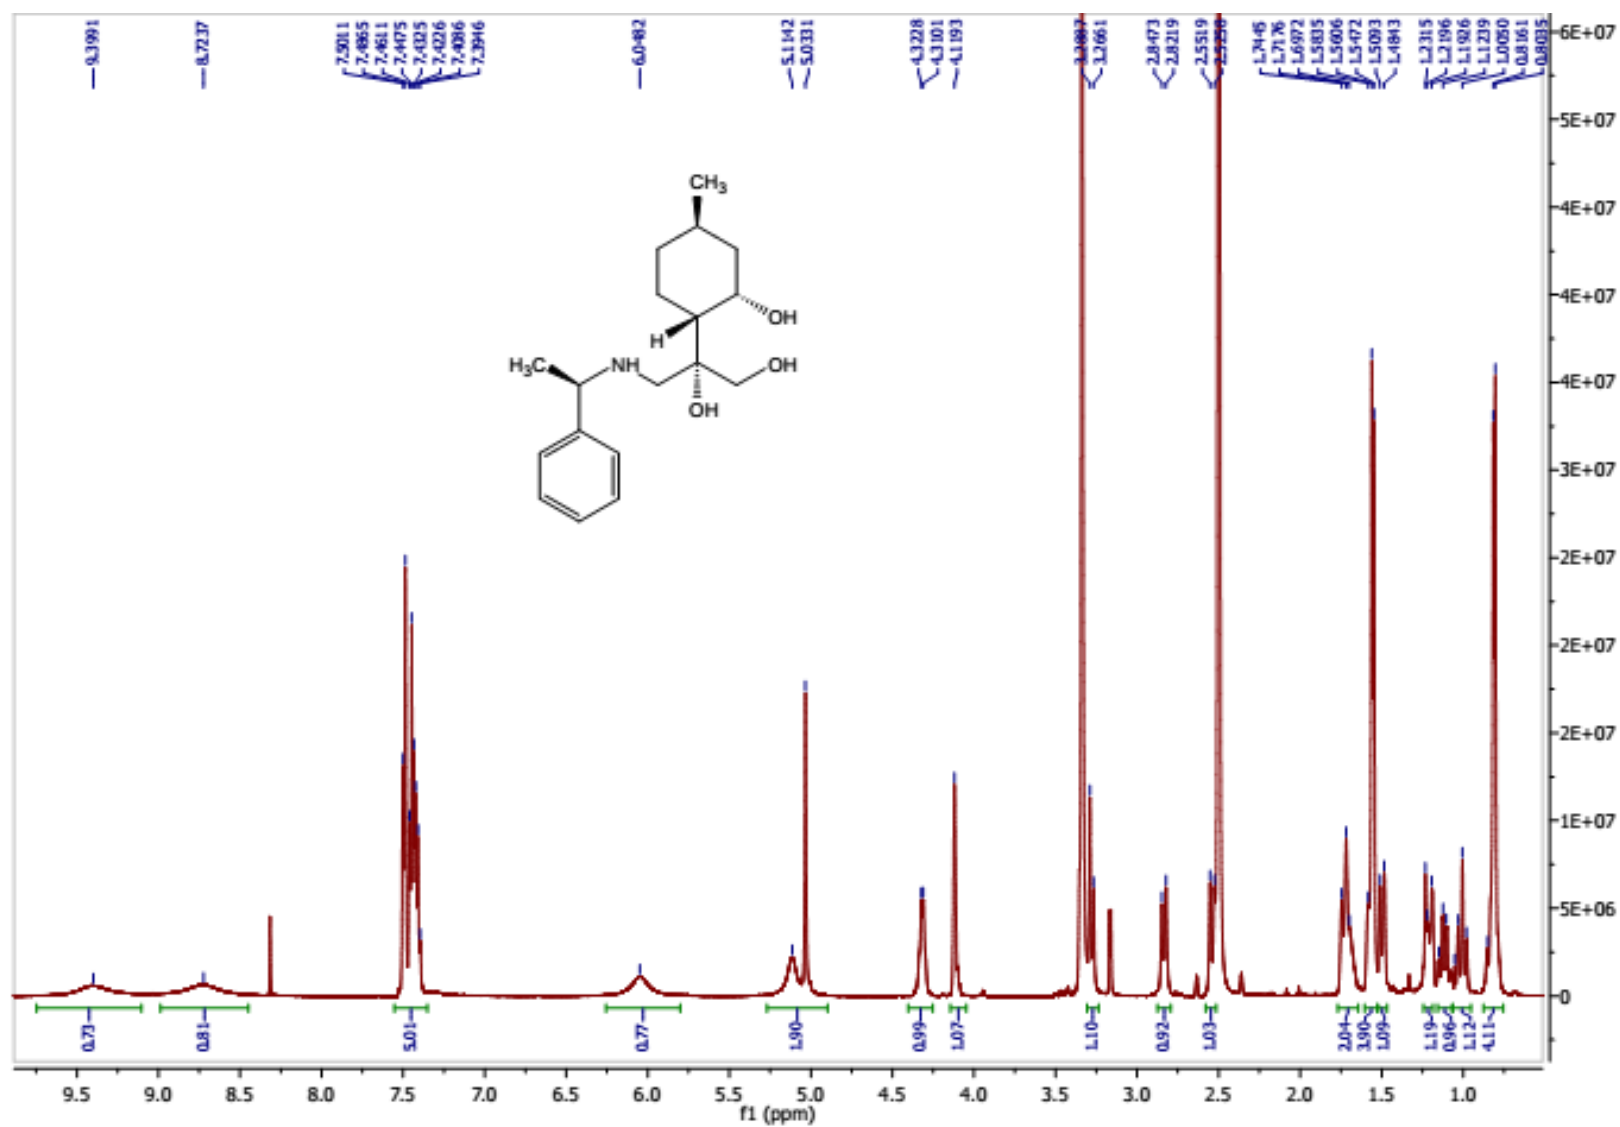

$^{13}\text{C}$ -NMR of compound 33

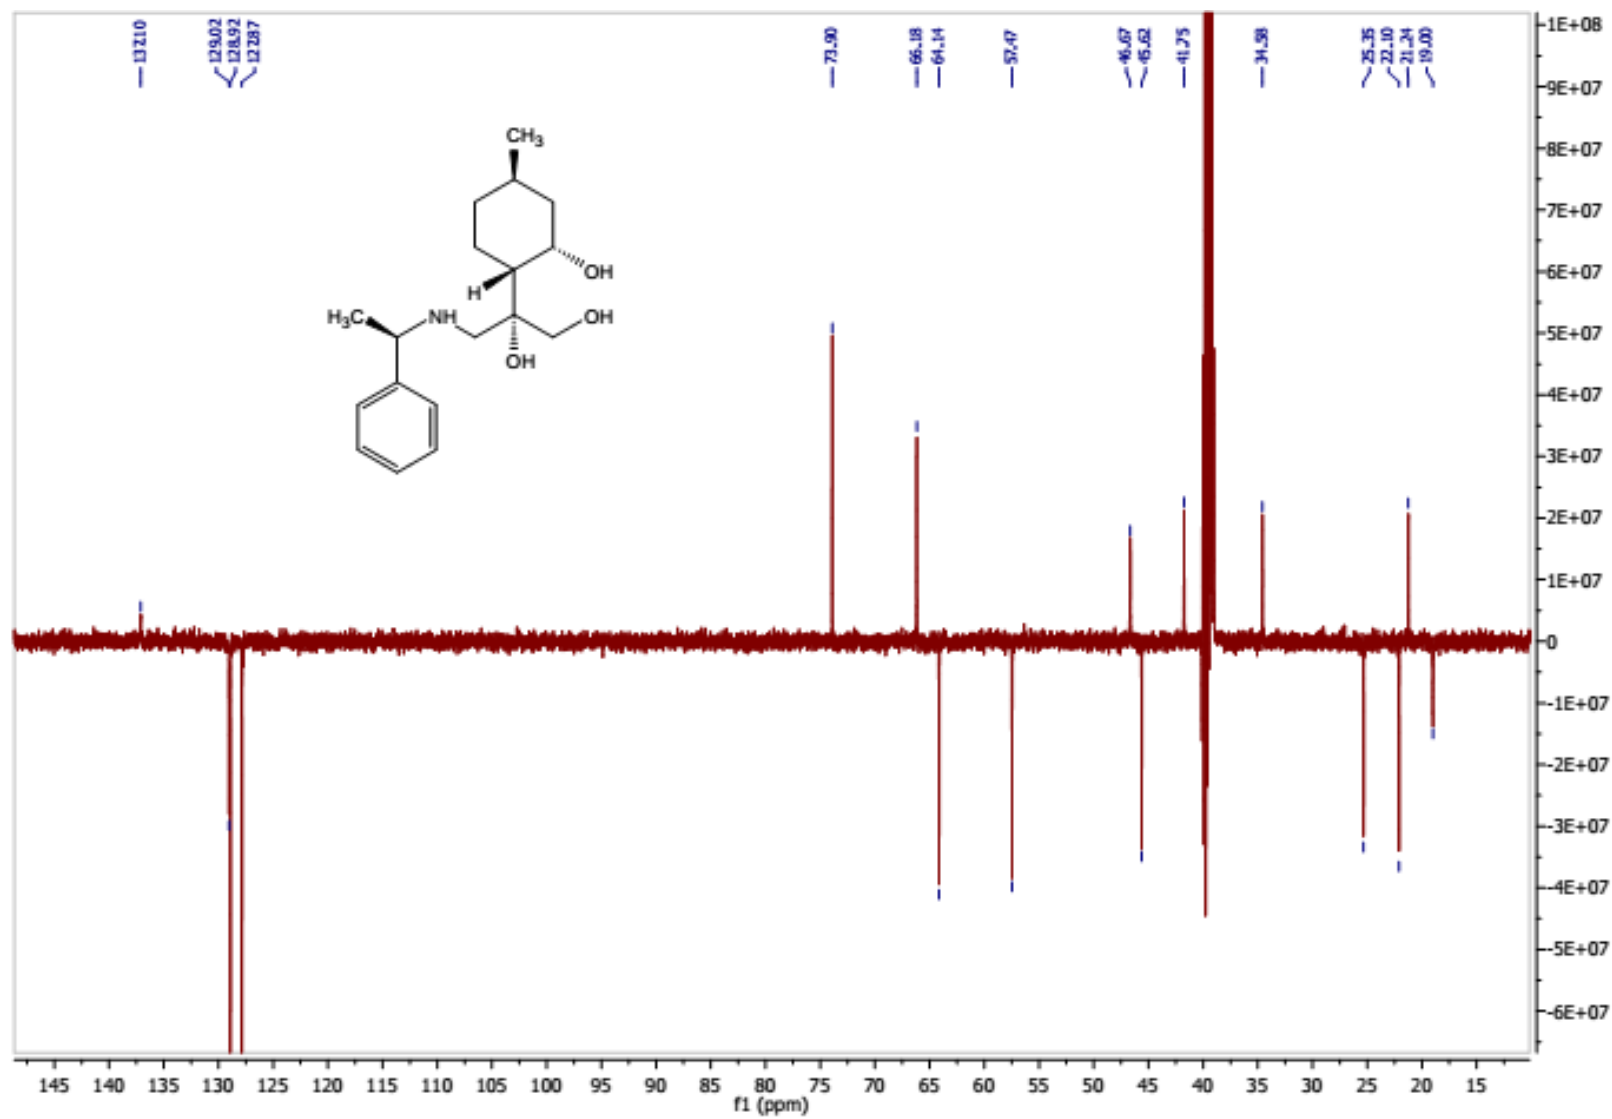

COSY of compound 33

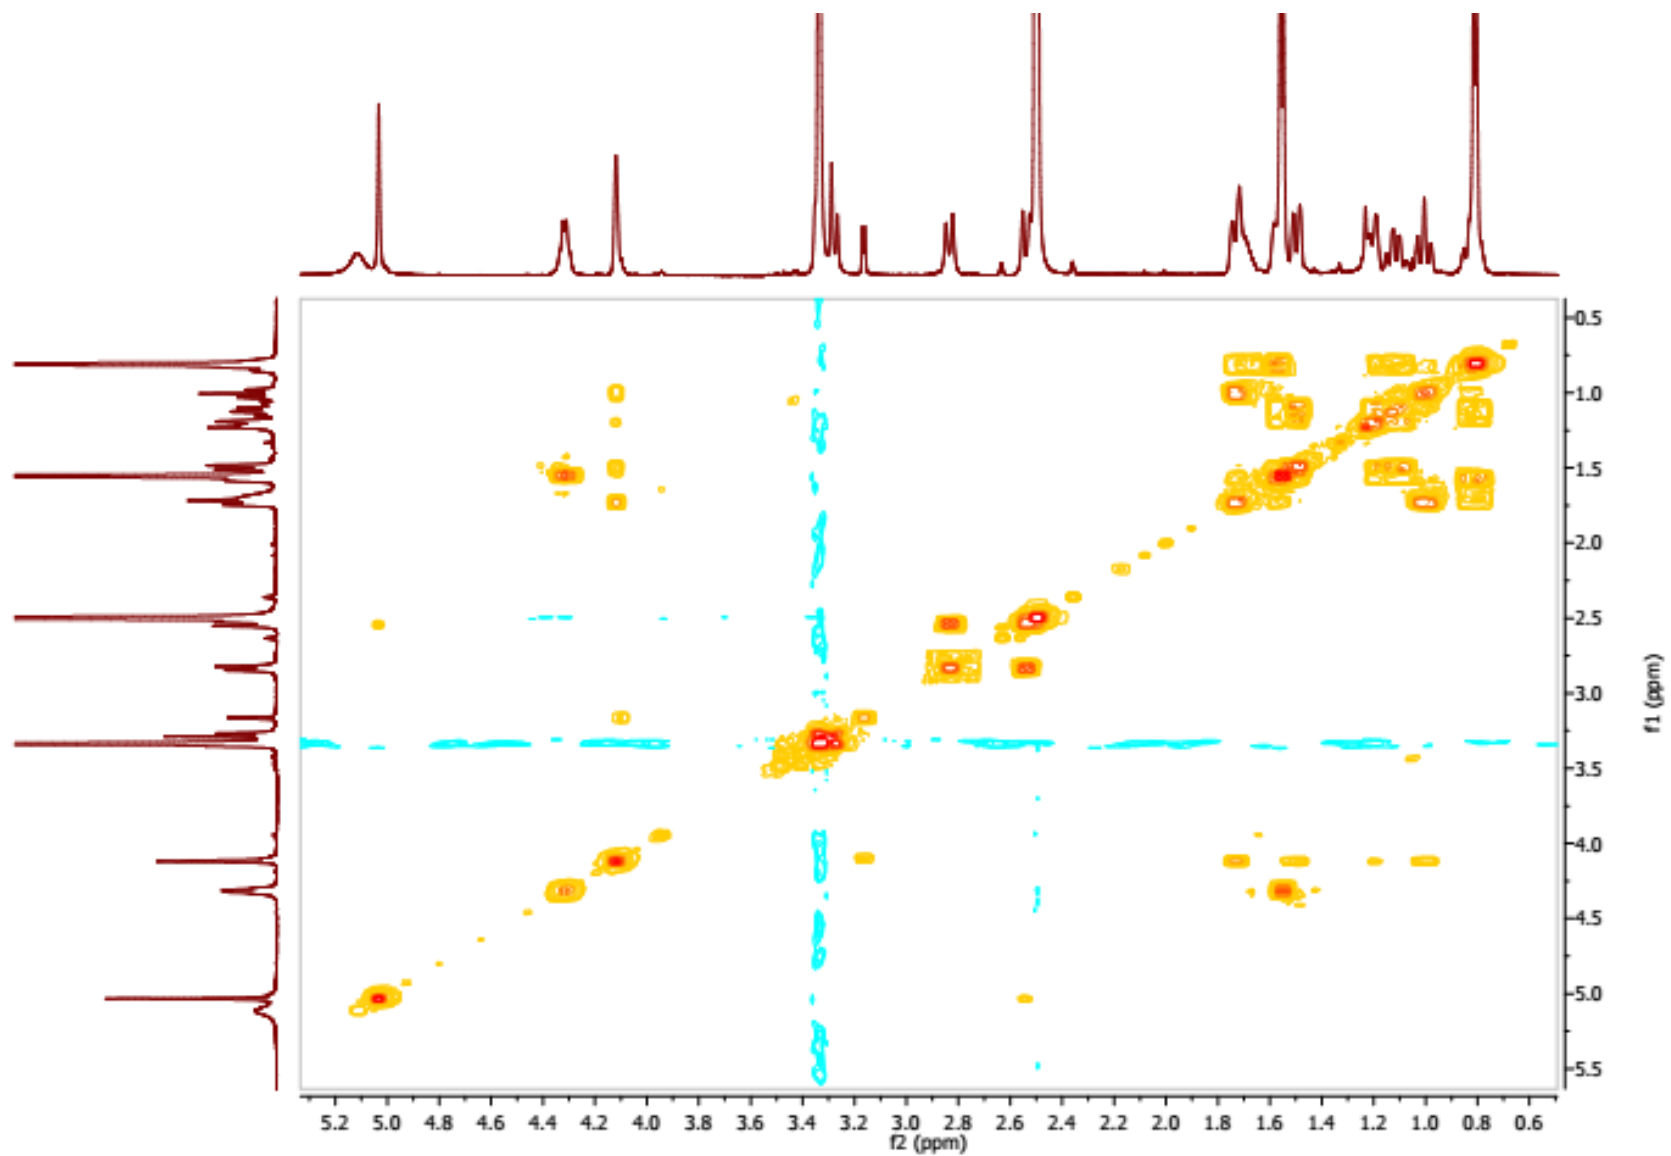

NOESY of compound 33

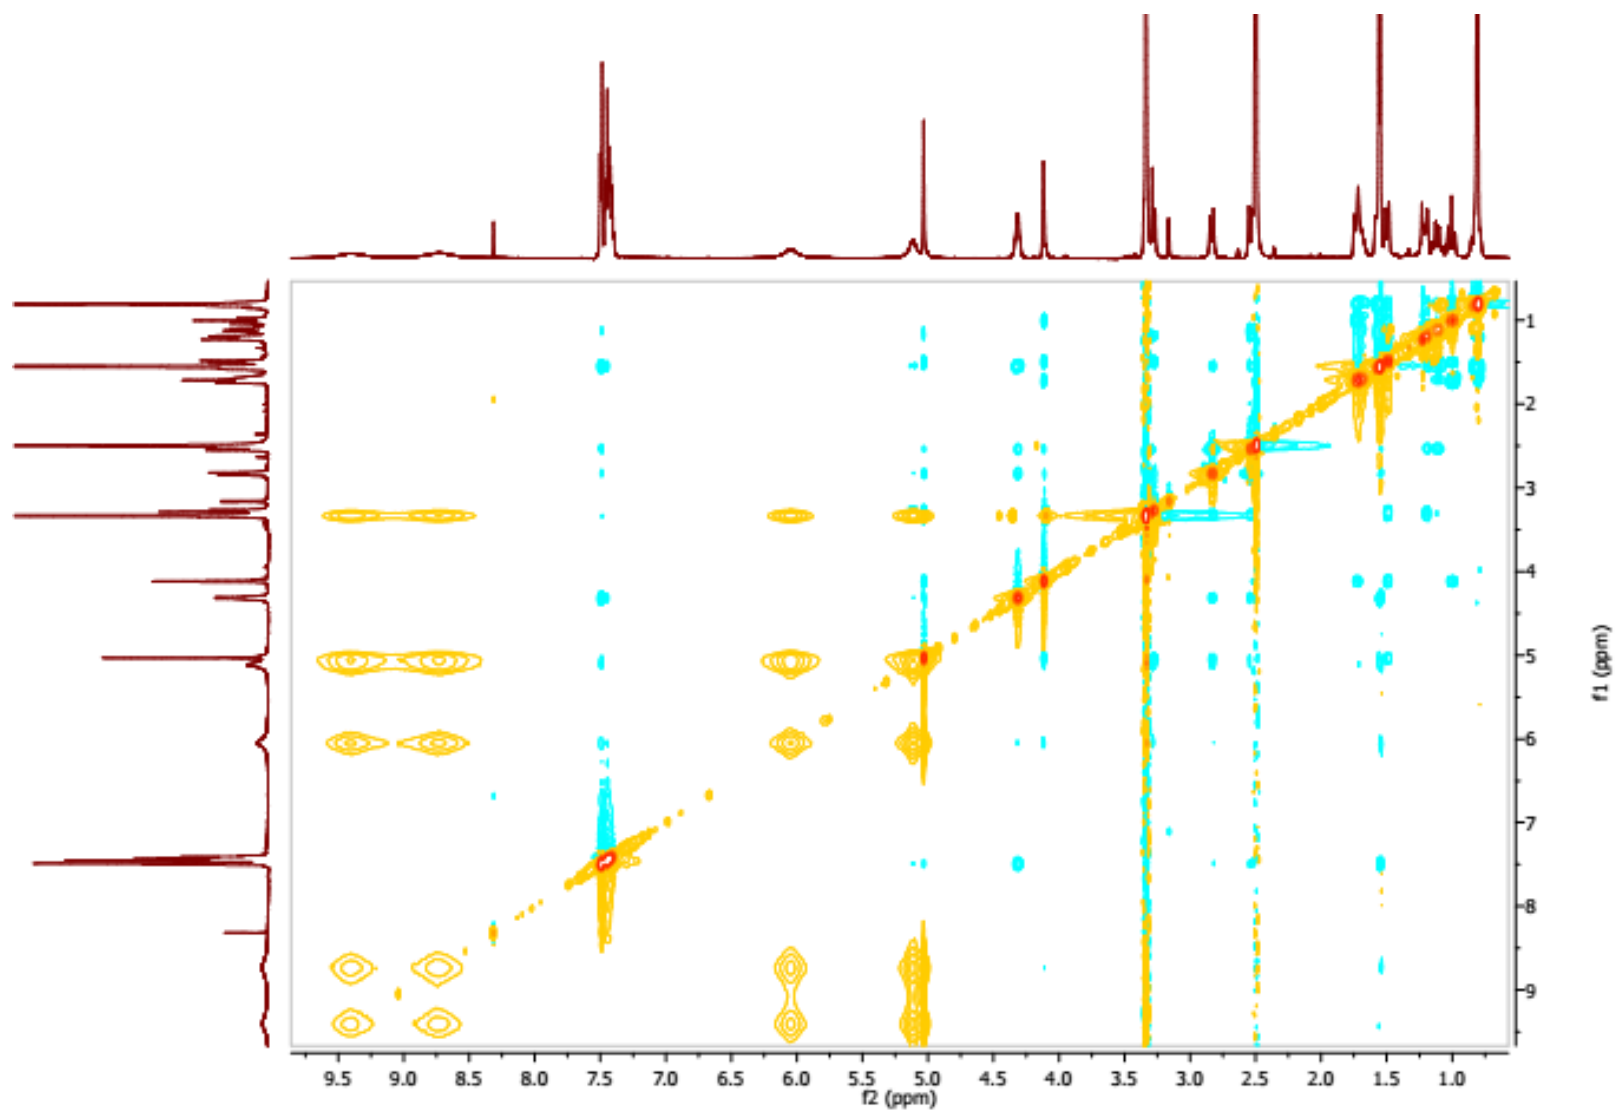

HSQC of compound 33

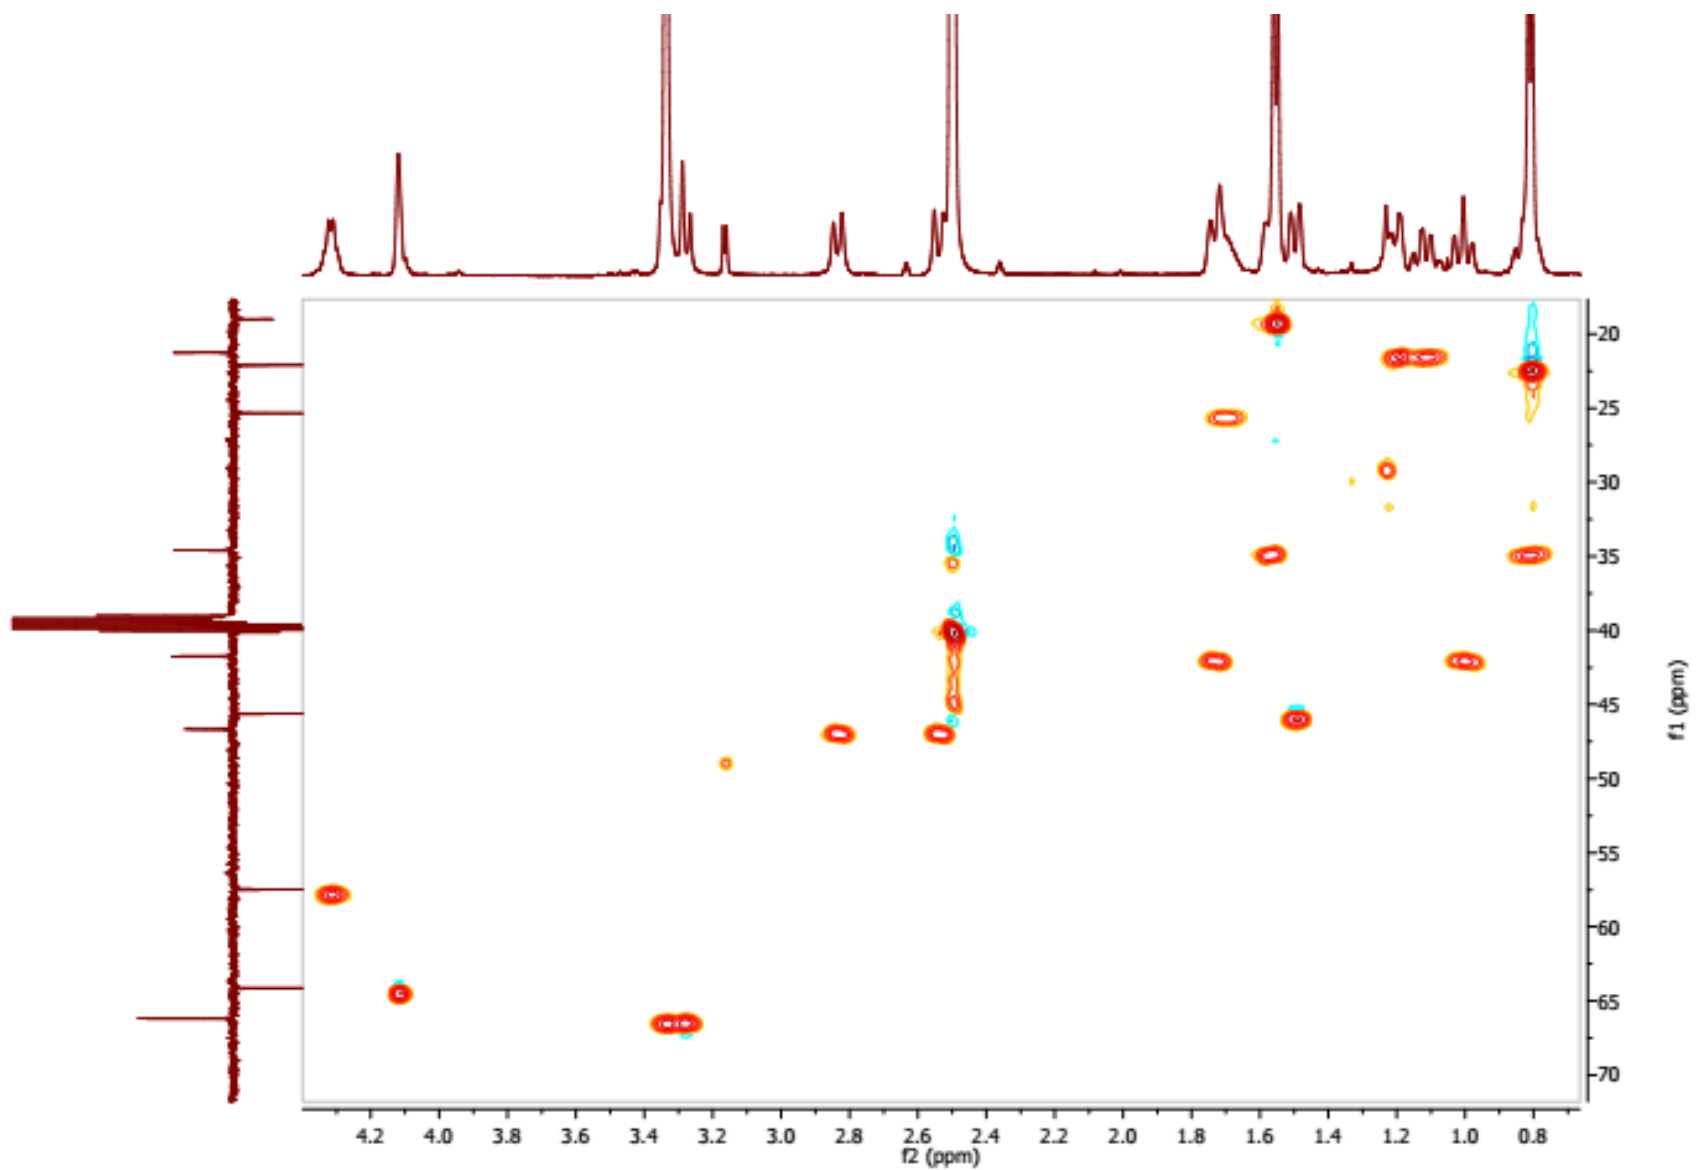



HMBC of compound 33

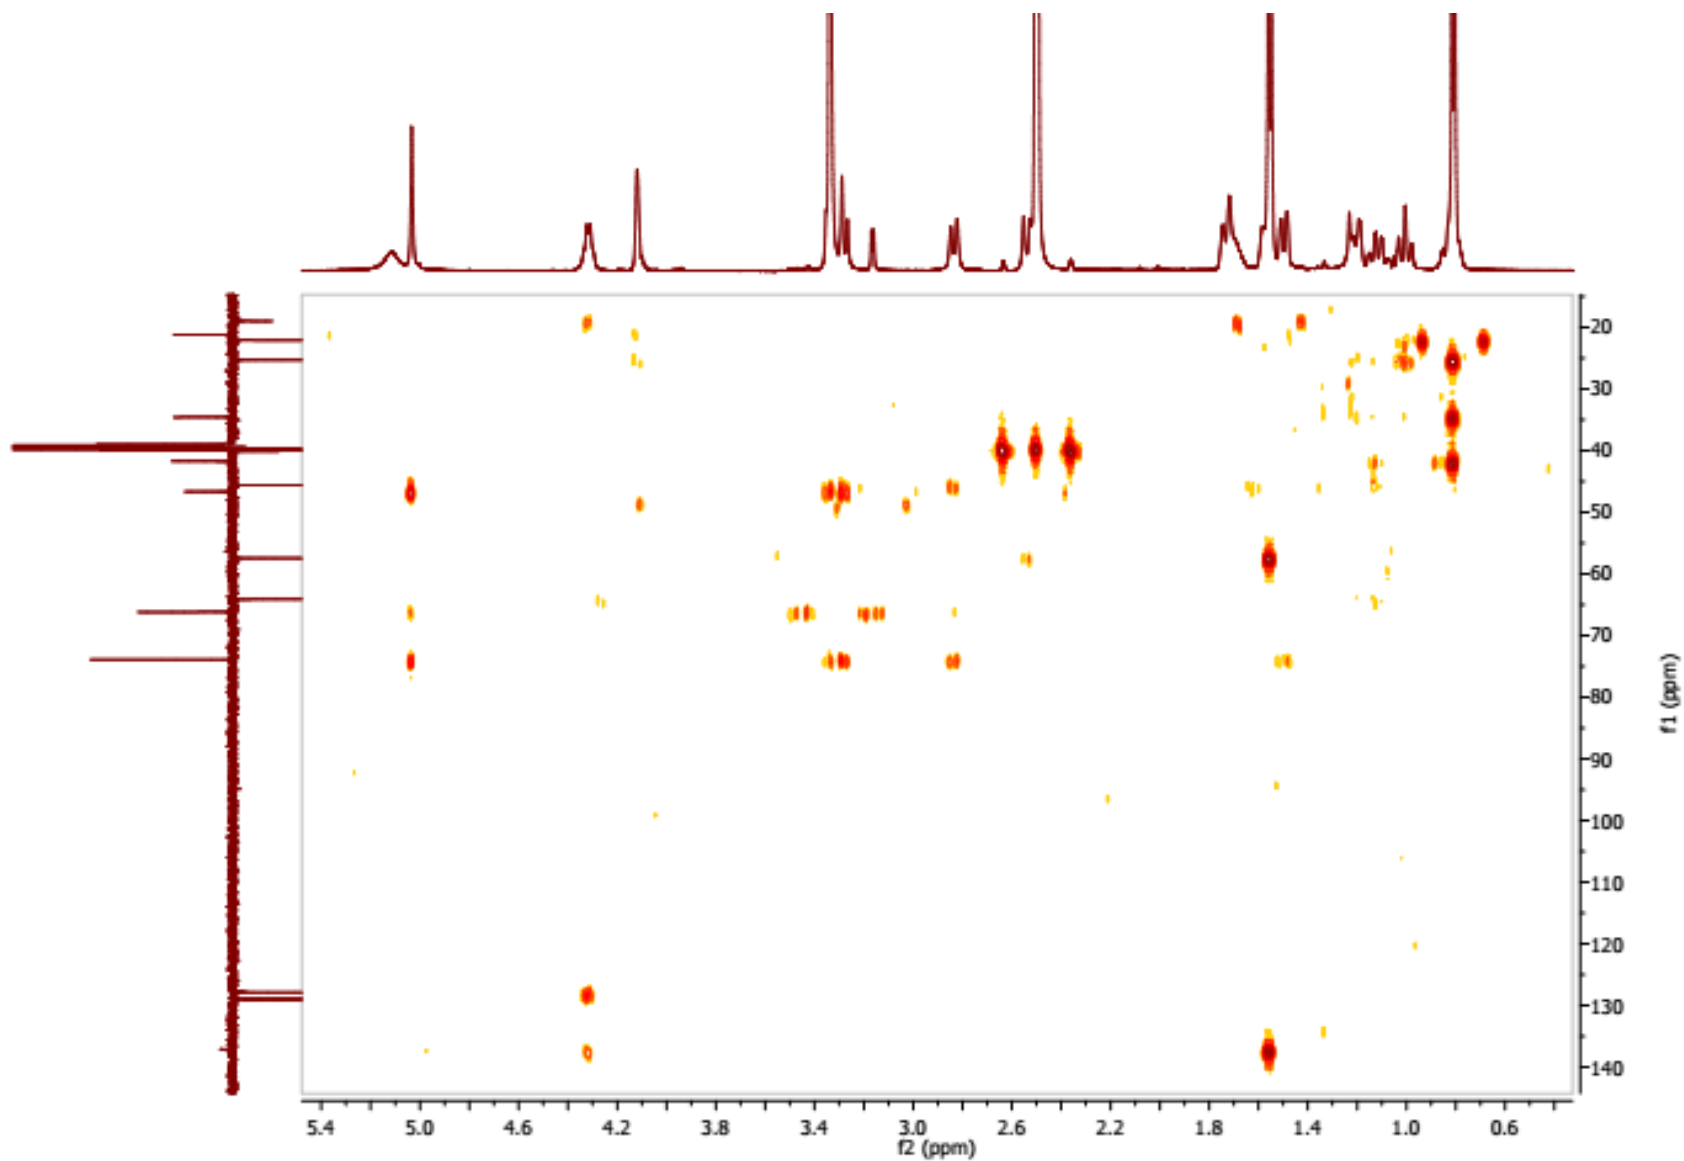

<sup>1</sup>H-NMR of compound 34

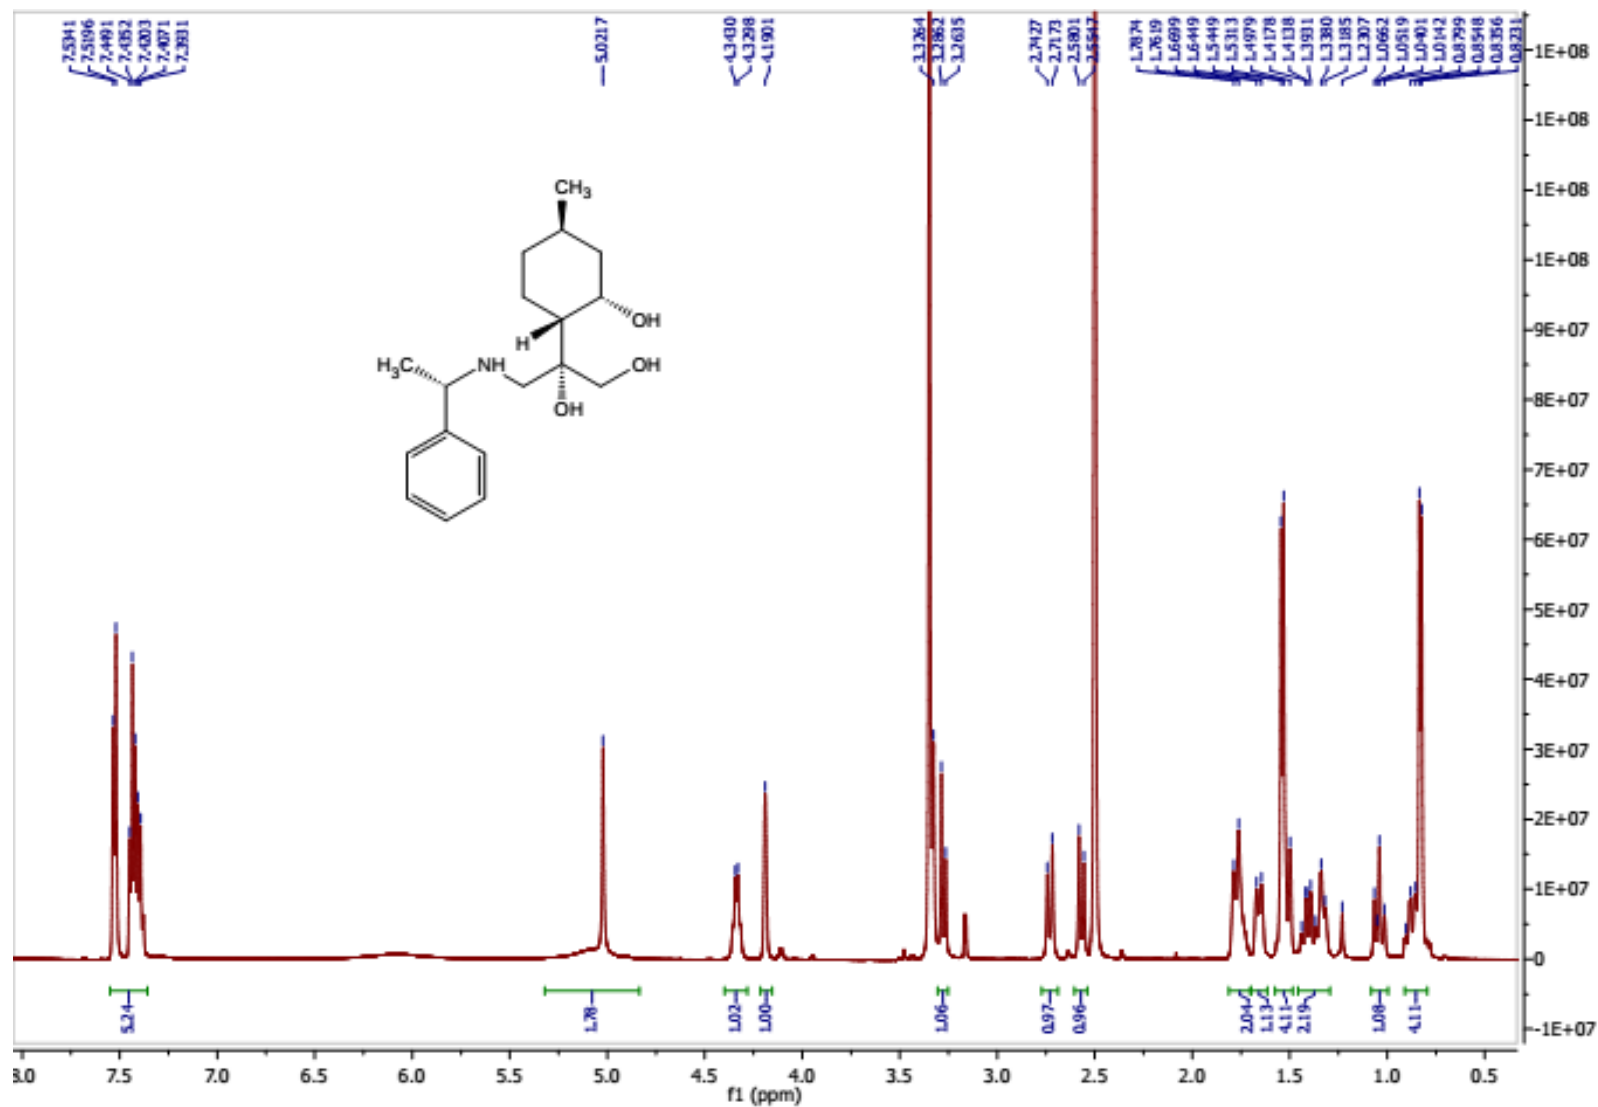

$^{13}\text{C}$ -NMR of compound 34

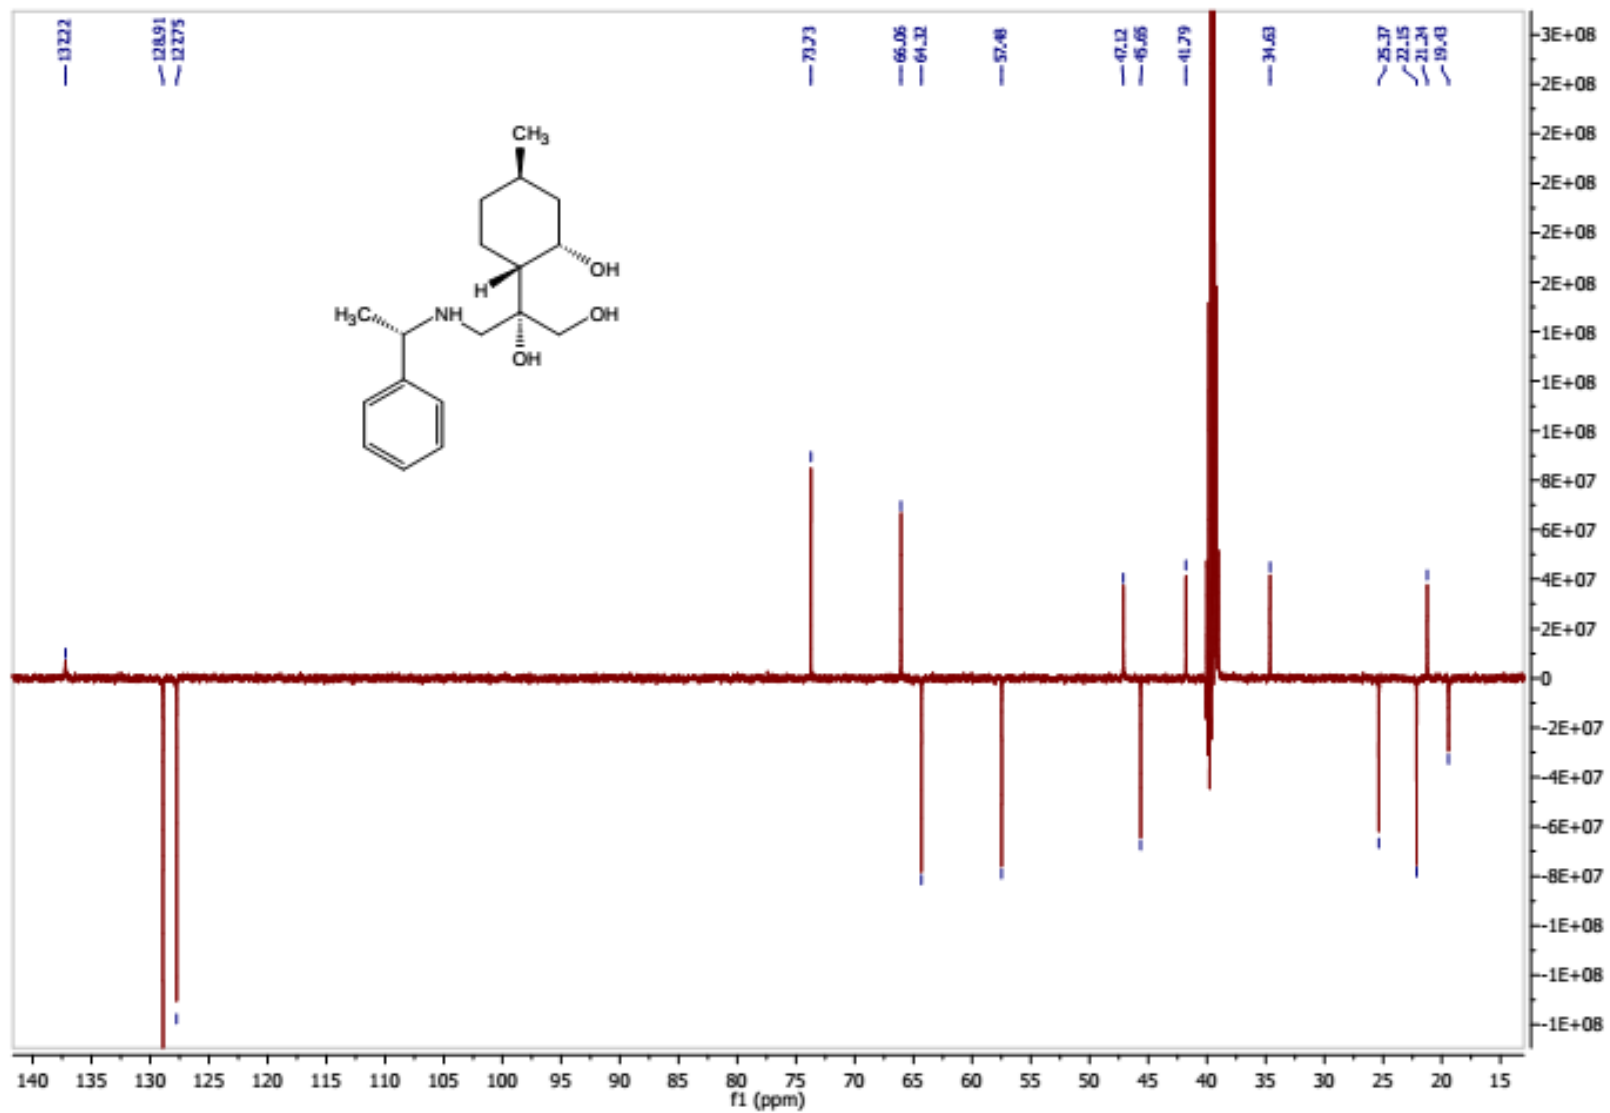

COSY of compound 34

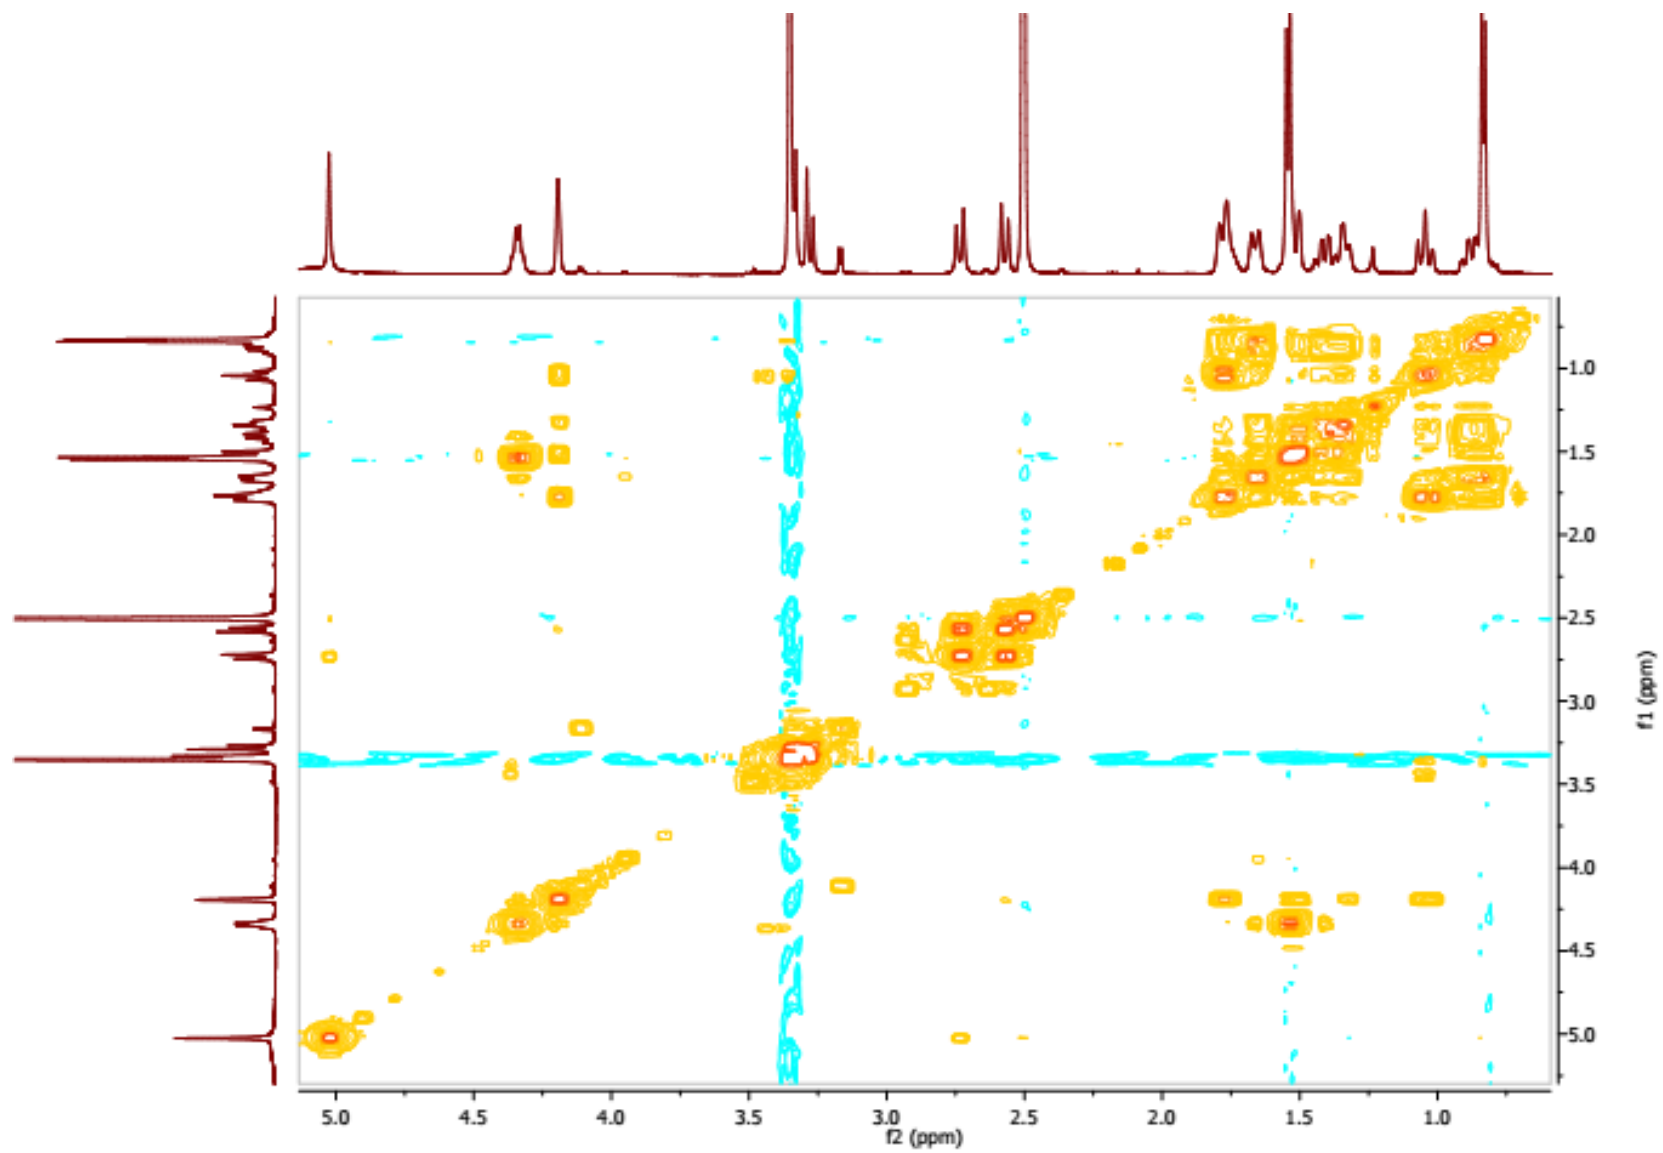

NOESY of compound 34

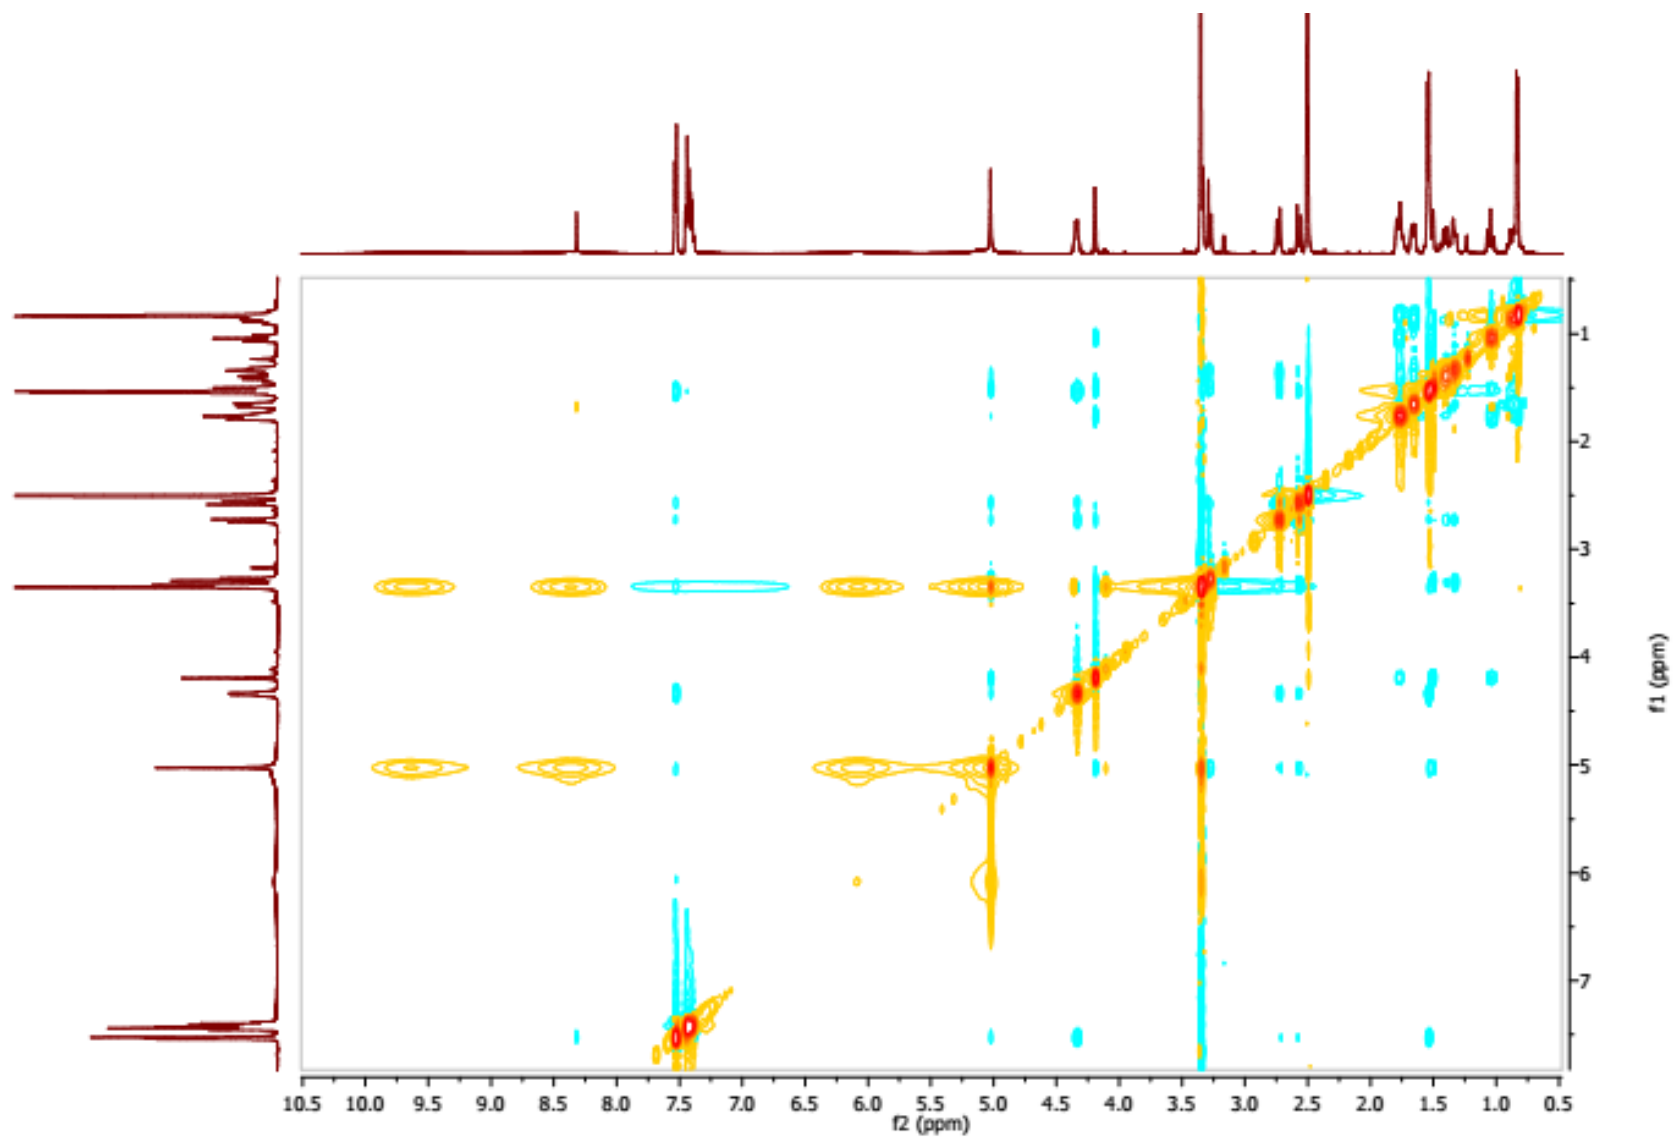

HSQC of compound **34**

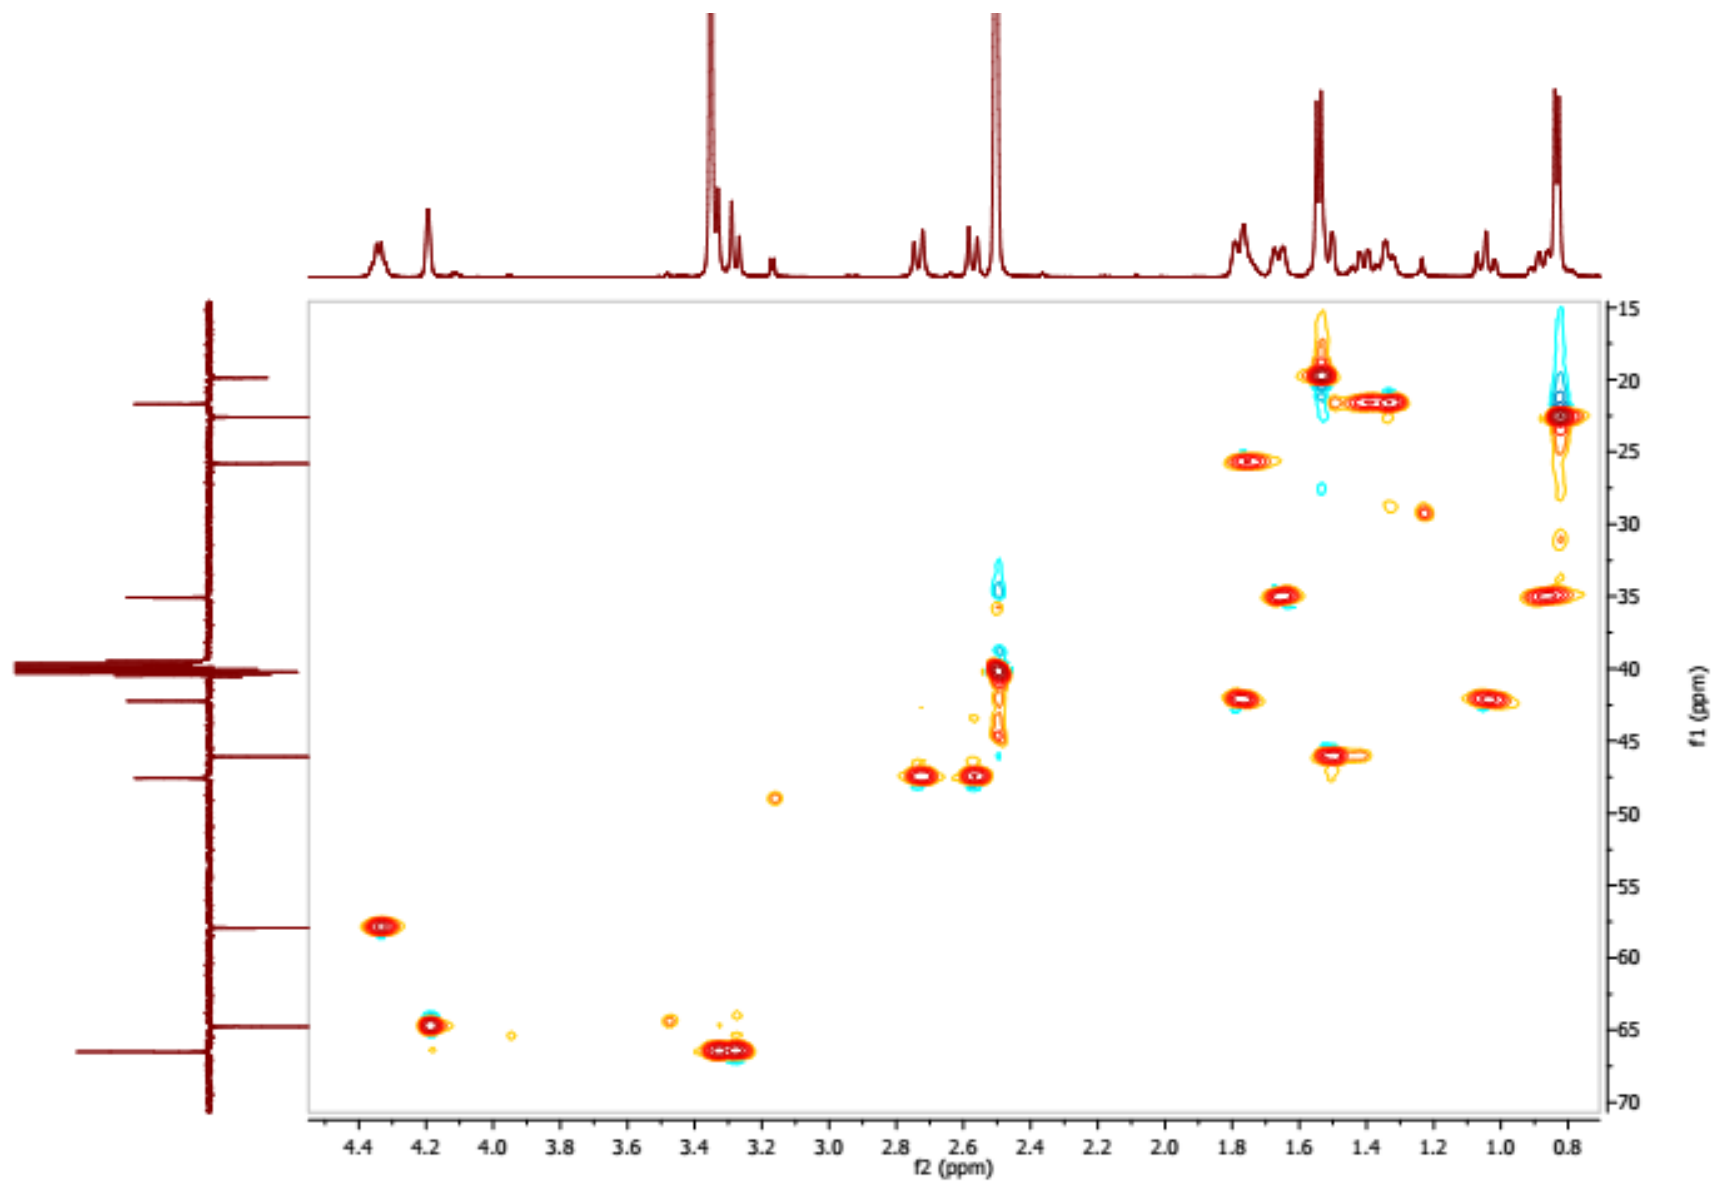

HMBC of compound 34

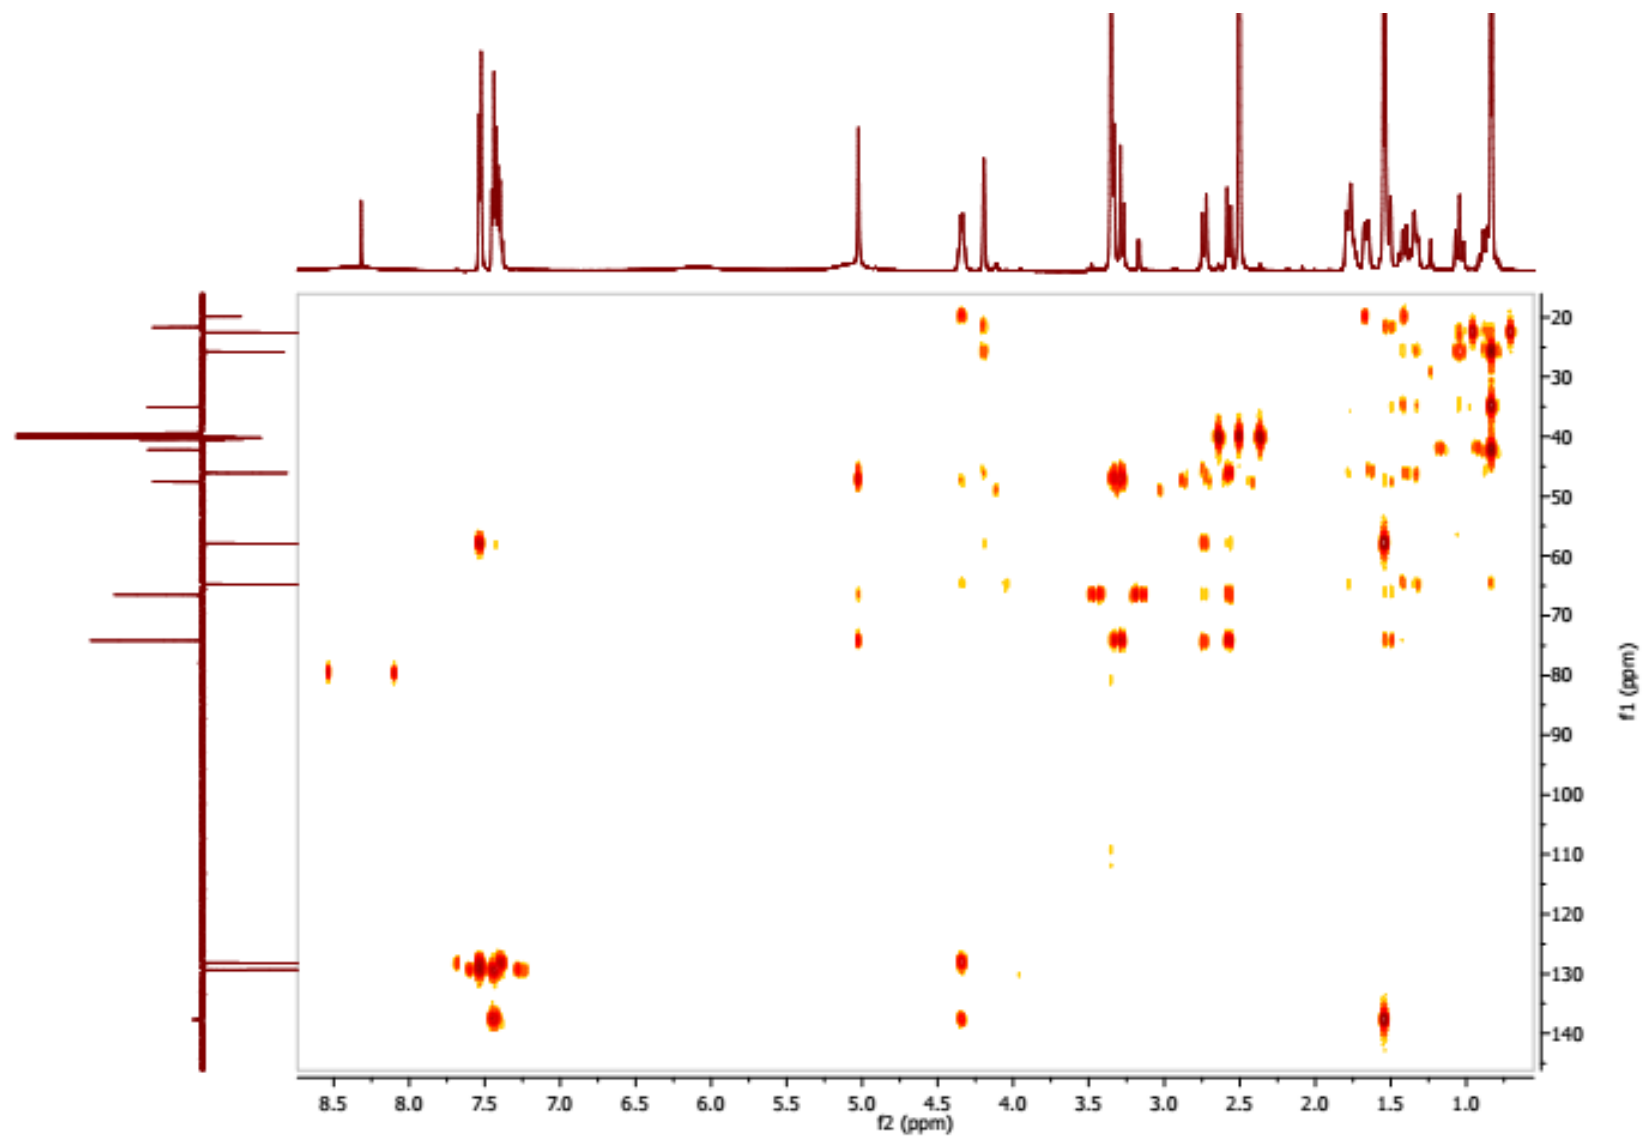

<sup>1</sup>H-NMR of compound 35

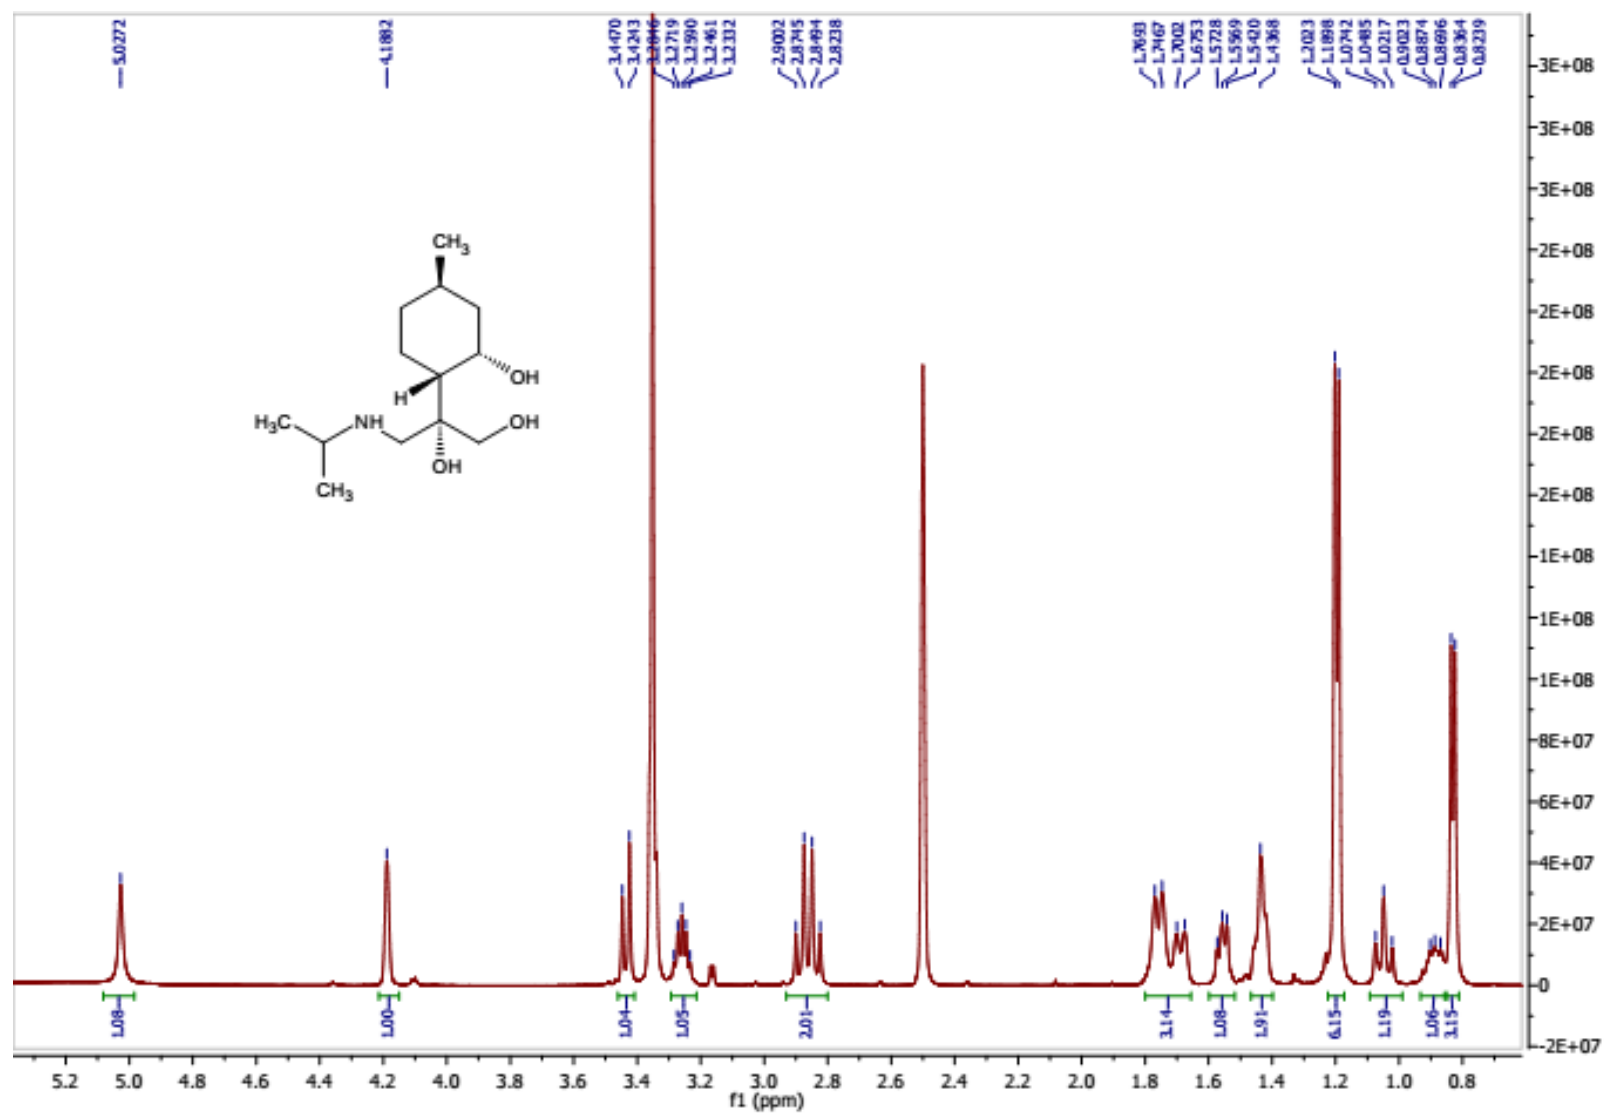



<sup>13</sup>C-NMR of compound 35

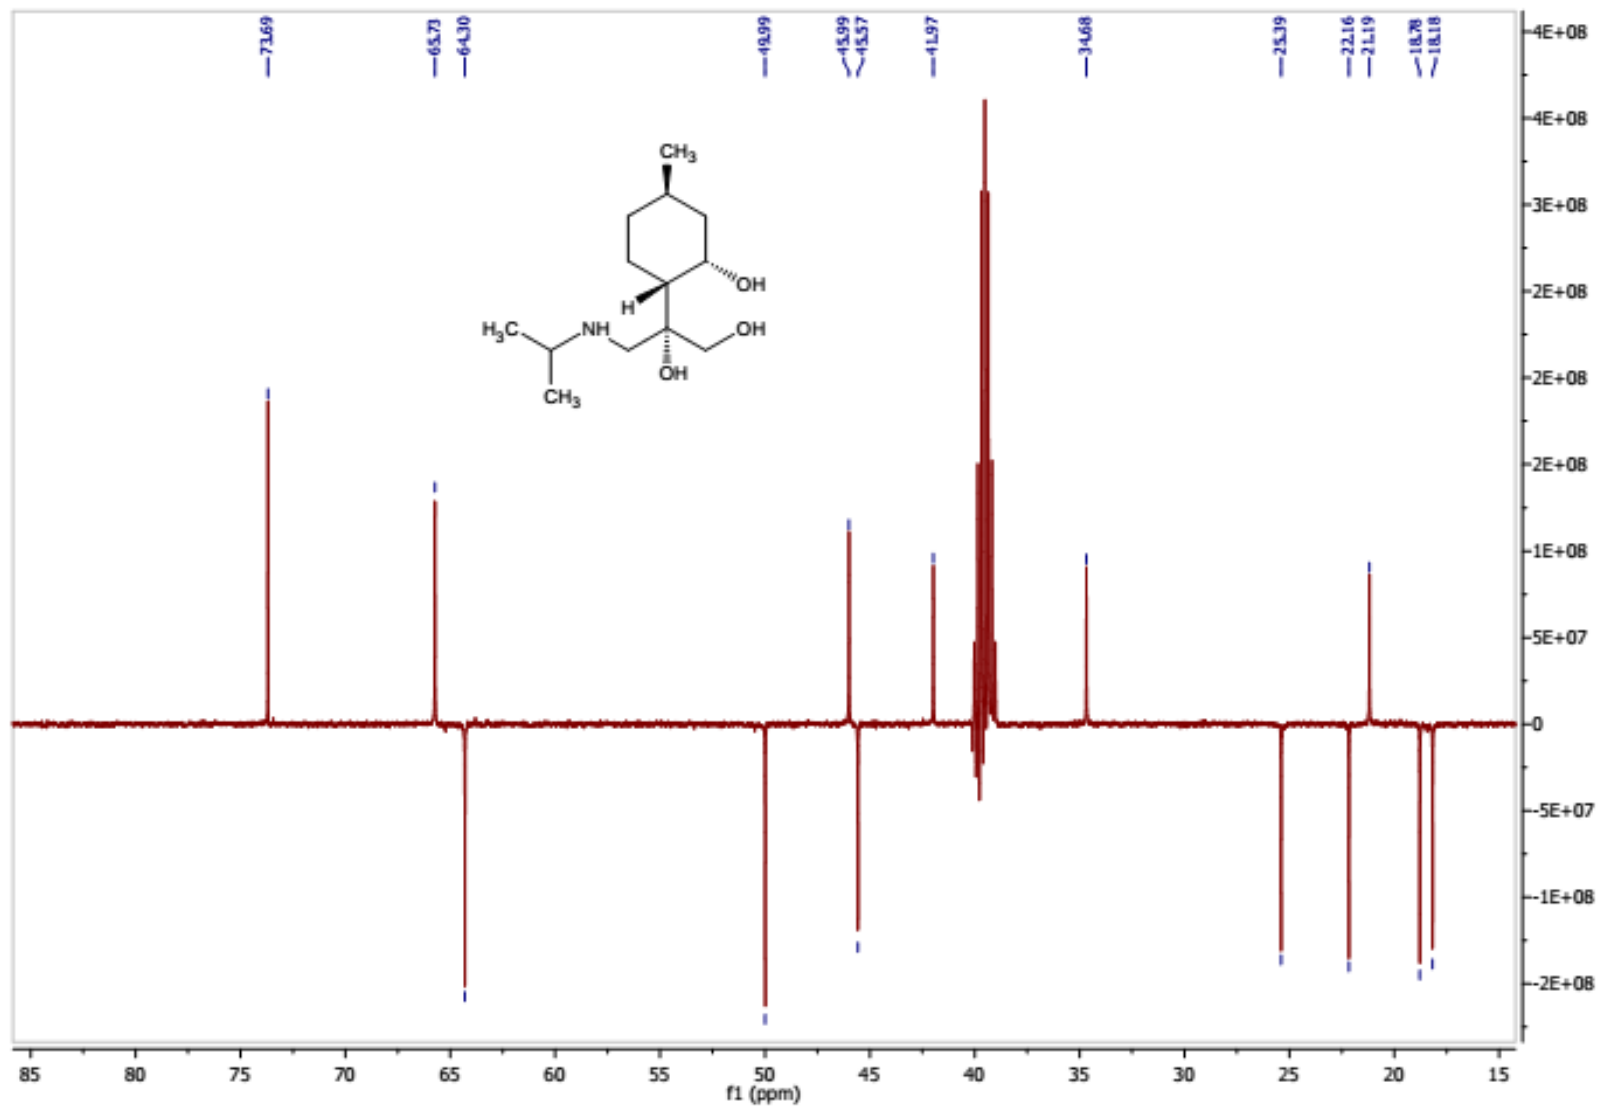

COSY of compound 35

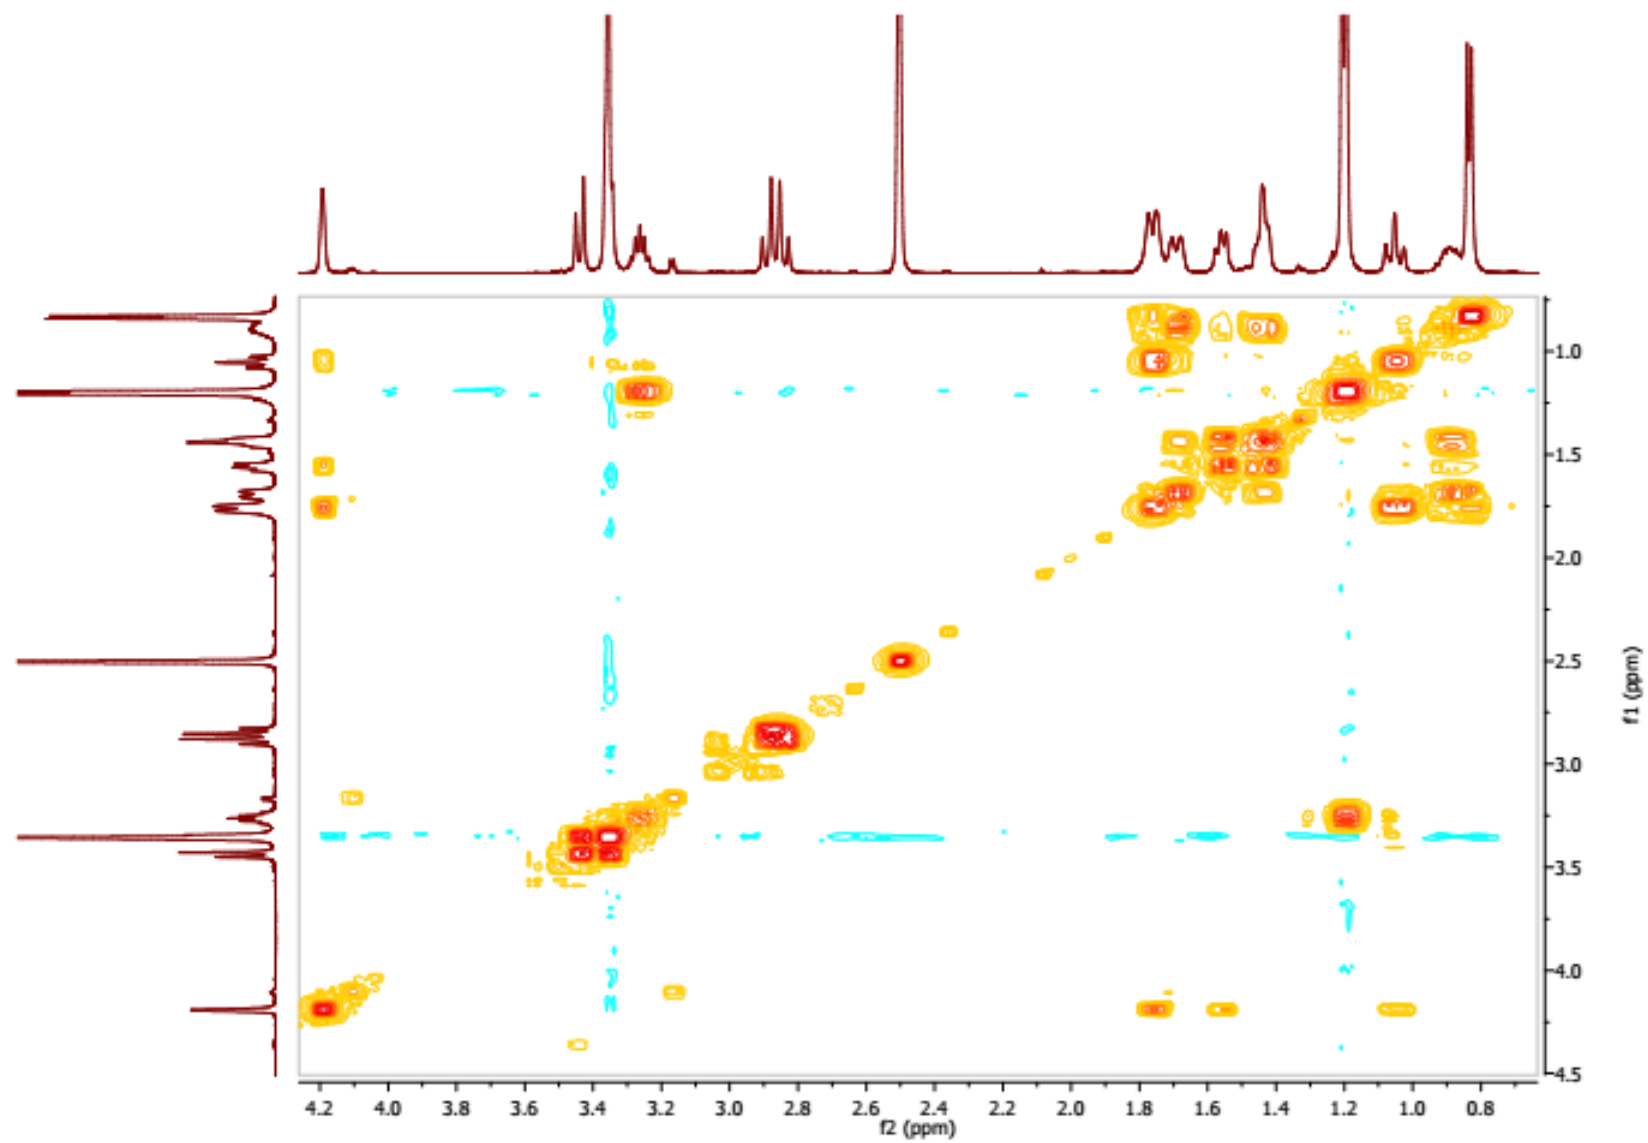



HSQC of compound **35**

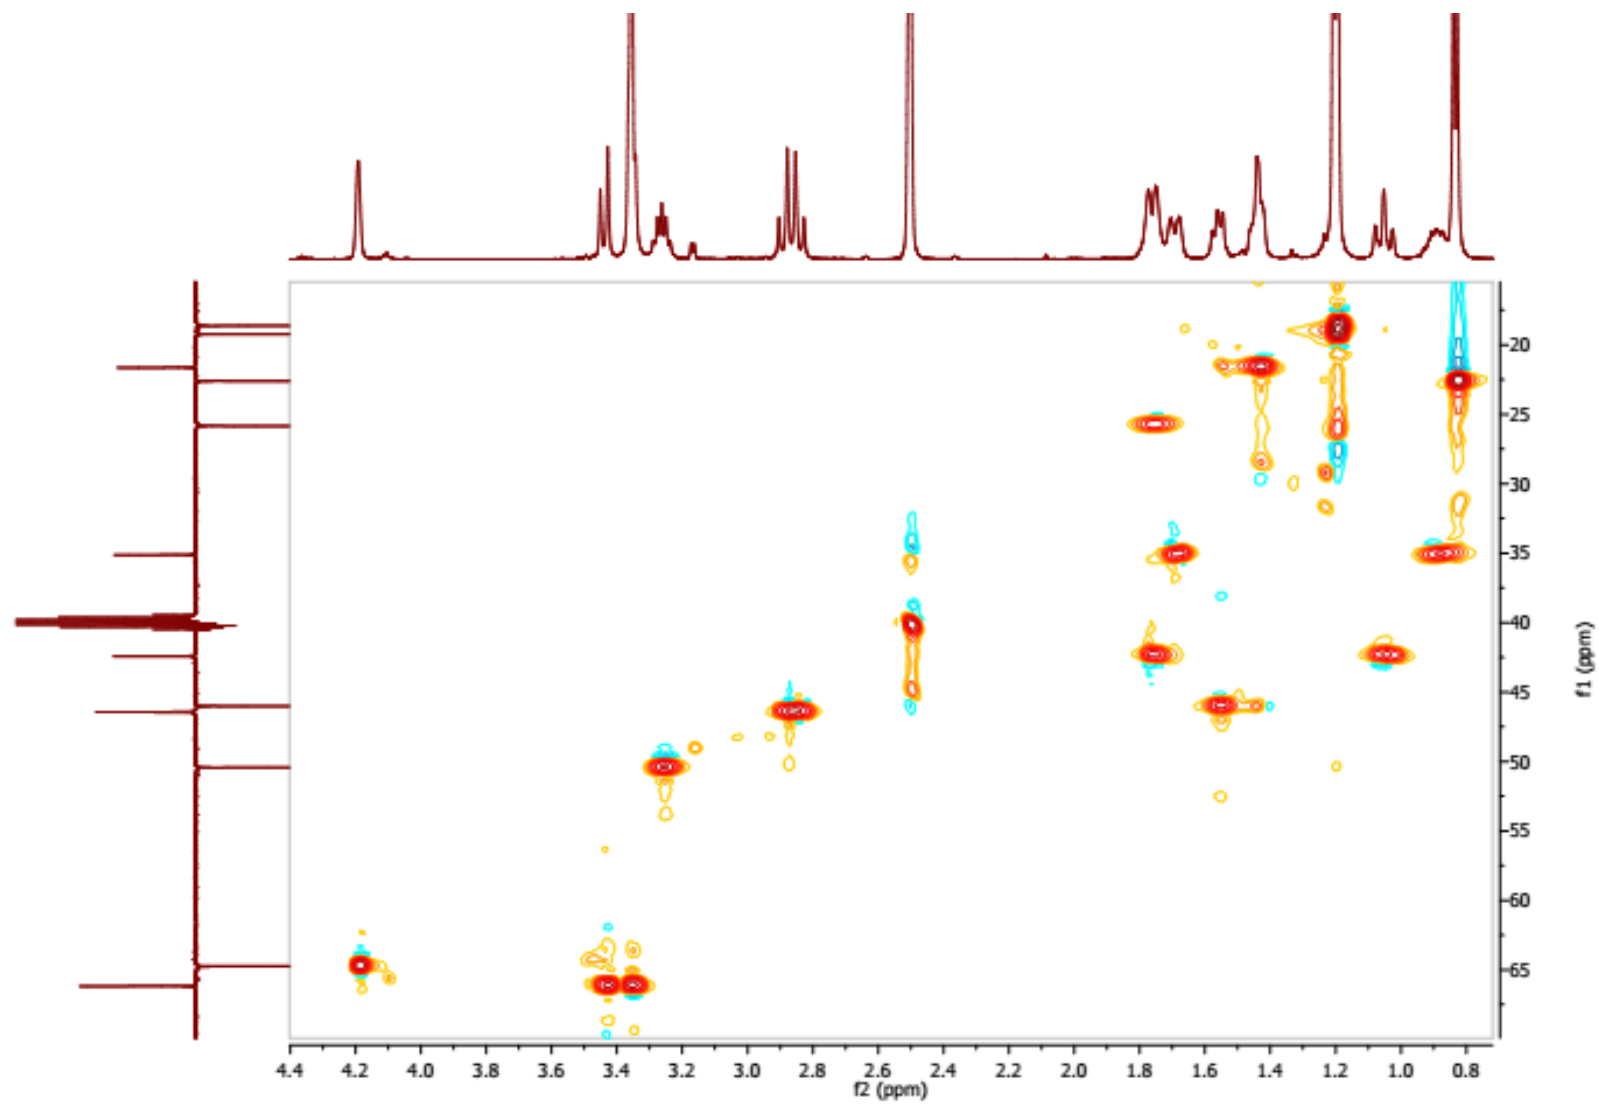

HMBC of compound 35

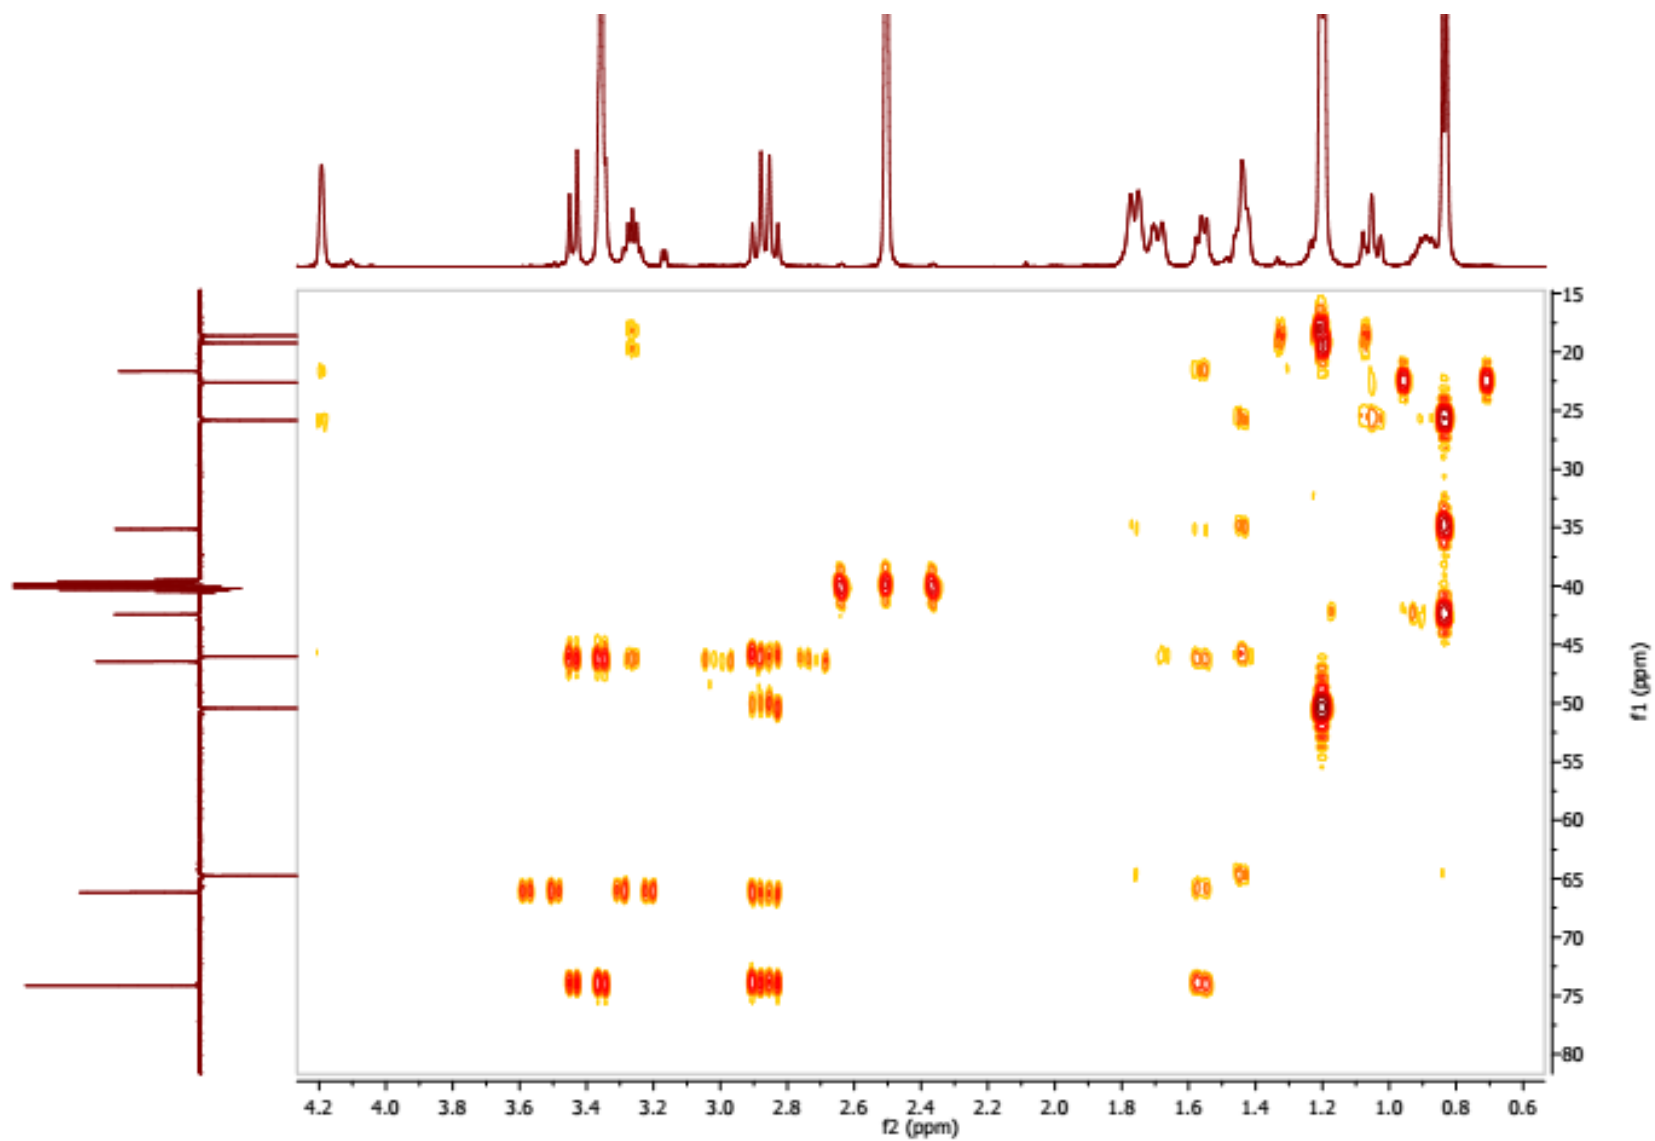

$^1\text{H-NMR}$  of compound **36**

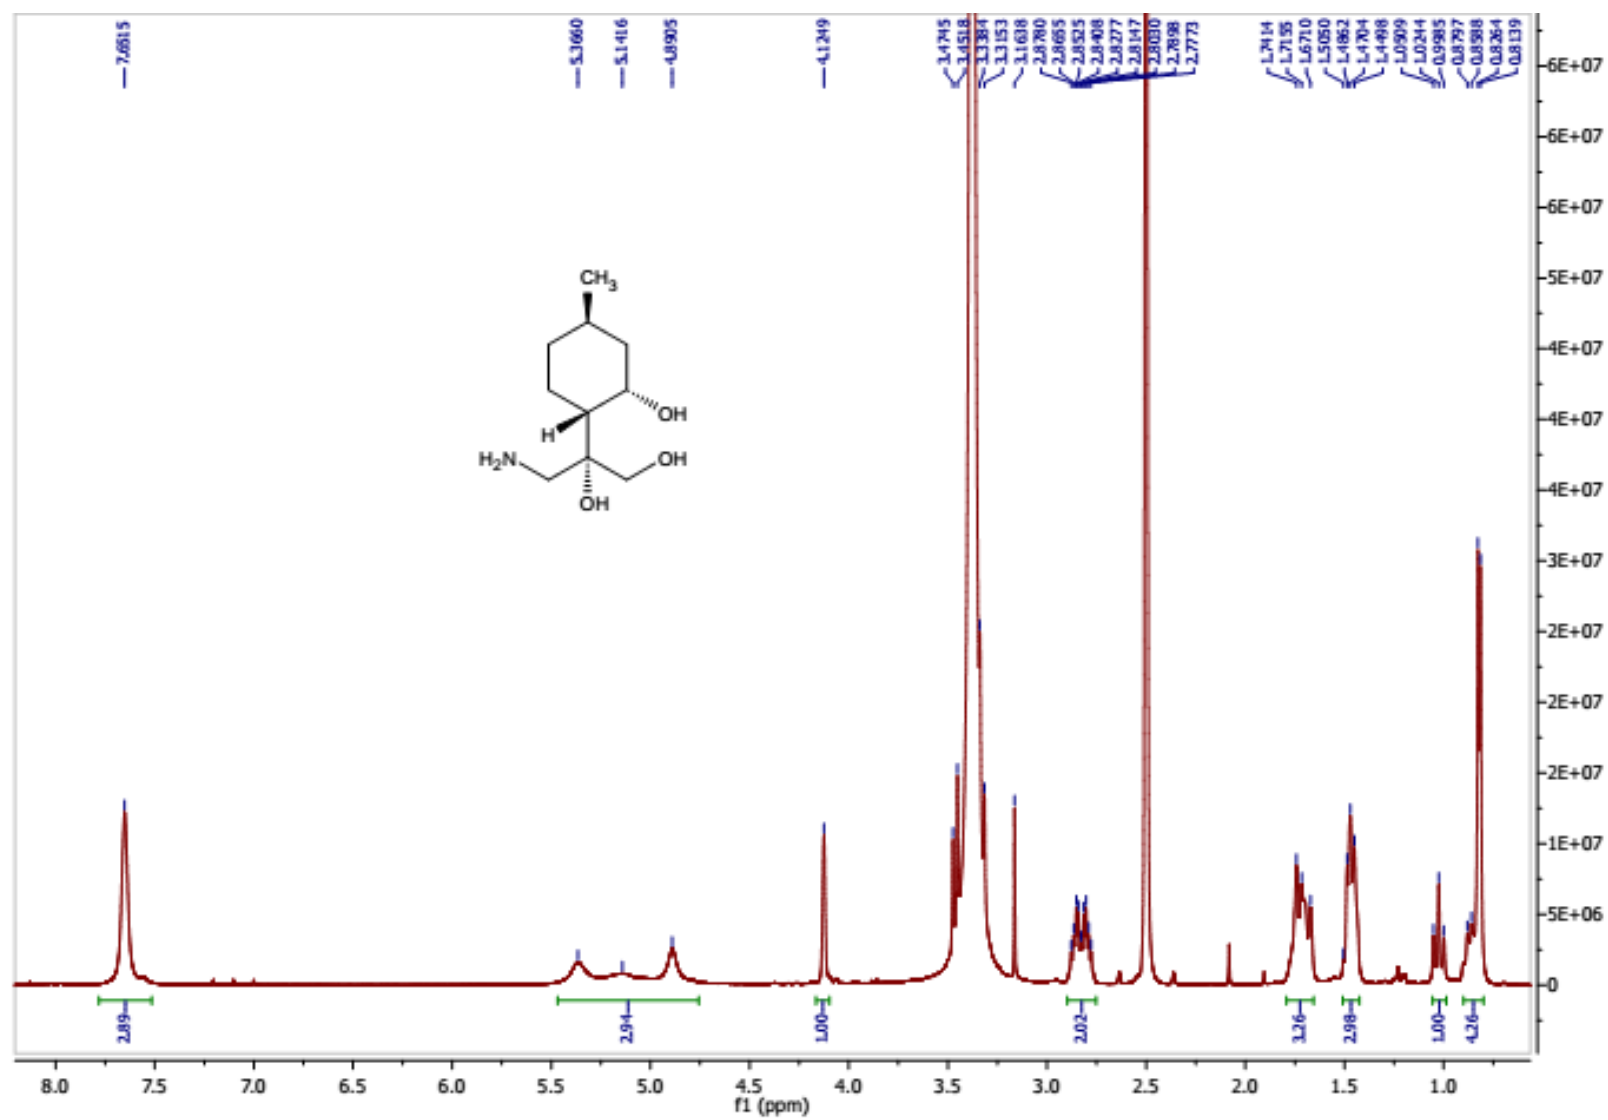

<sup>13</sup>C-NMR of compound **36**

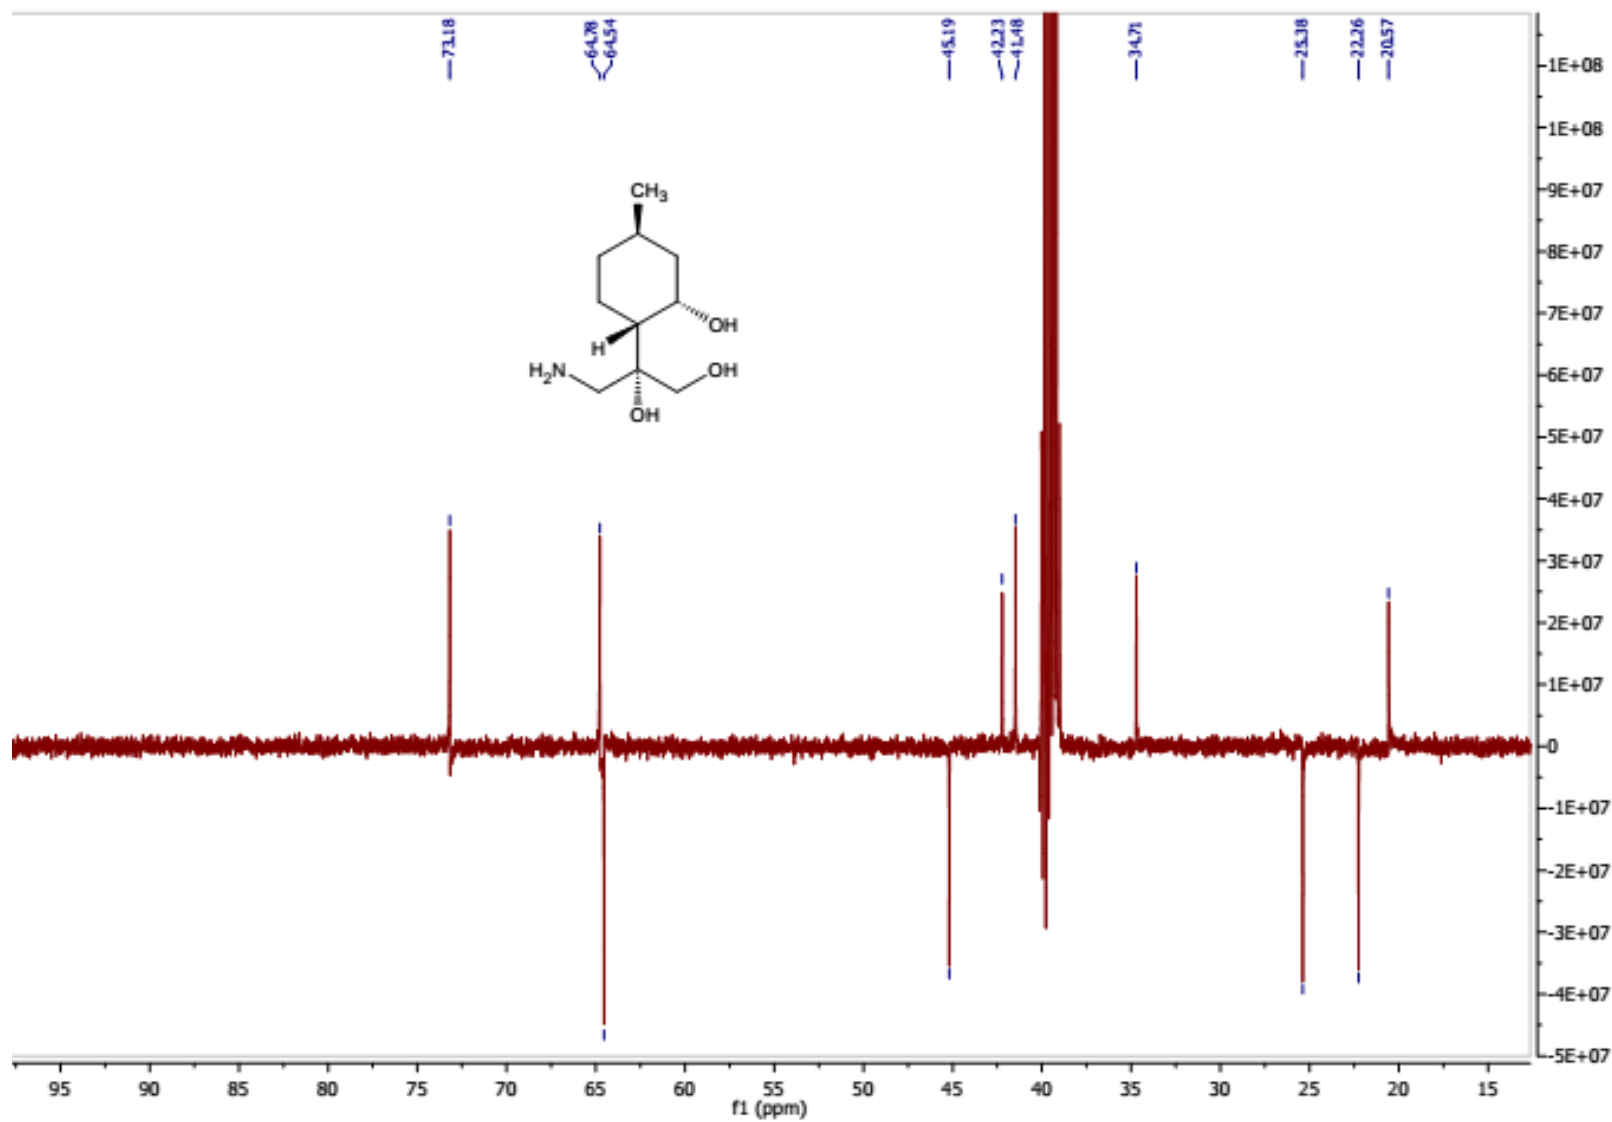

$^1\text{H-NMR}$  of compound **37**

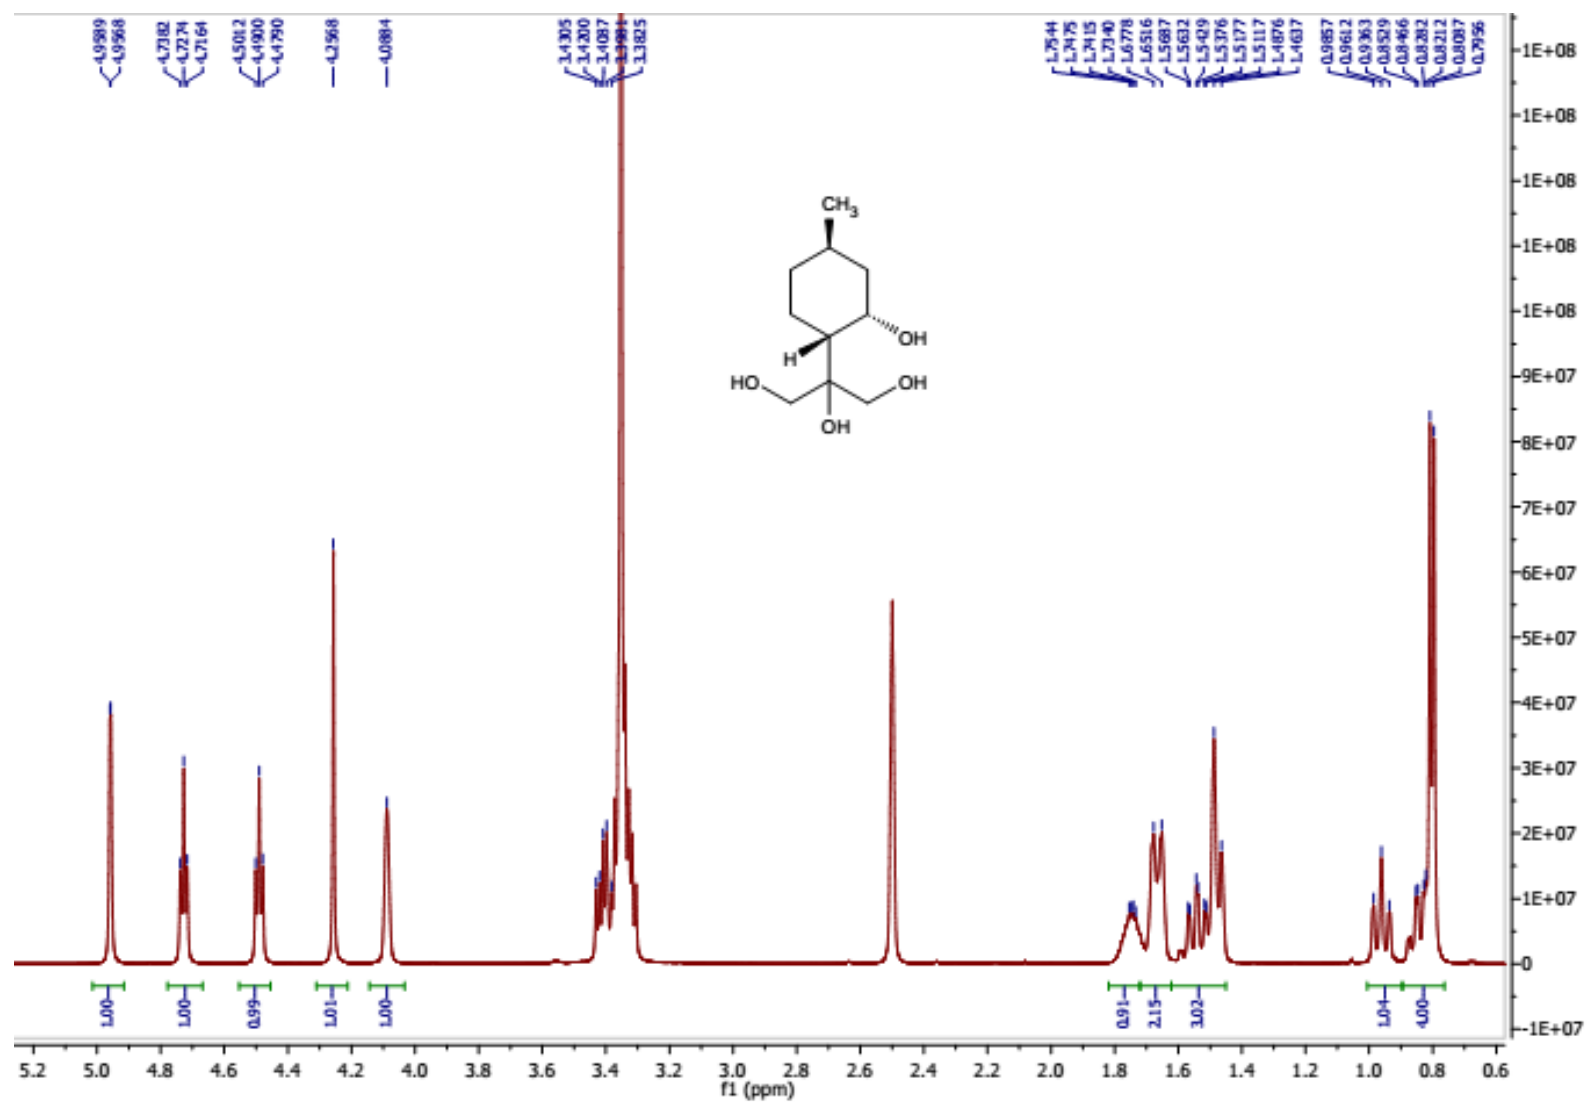



$^{13}\text{C}$ -NMR of compound **37**

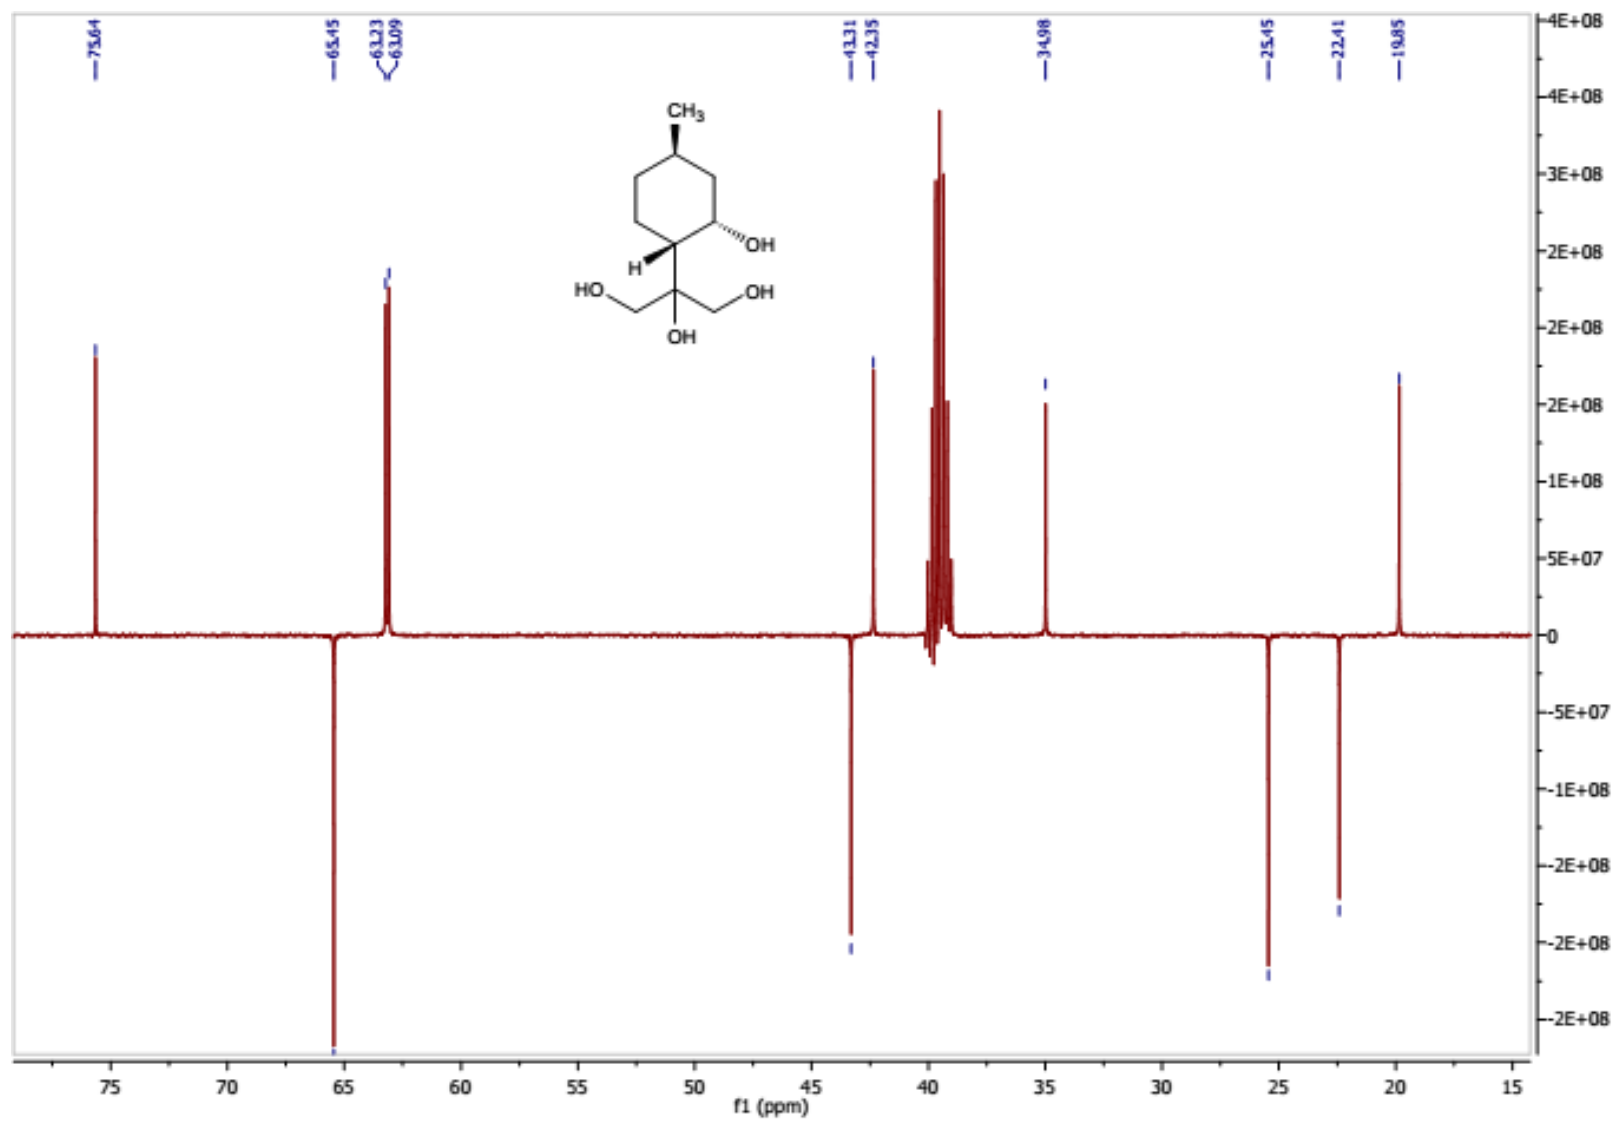

COSY of compound 37

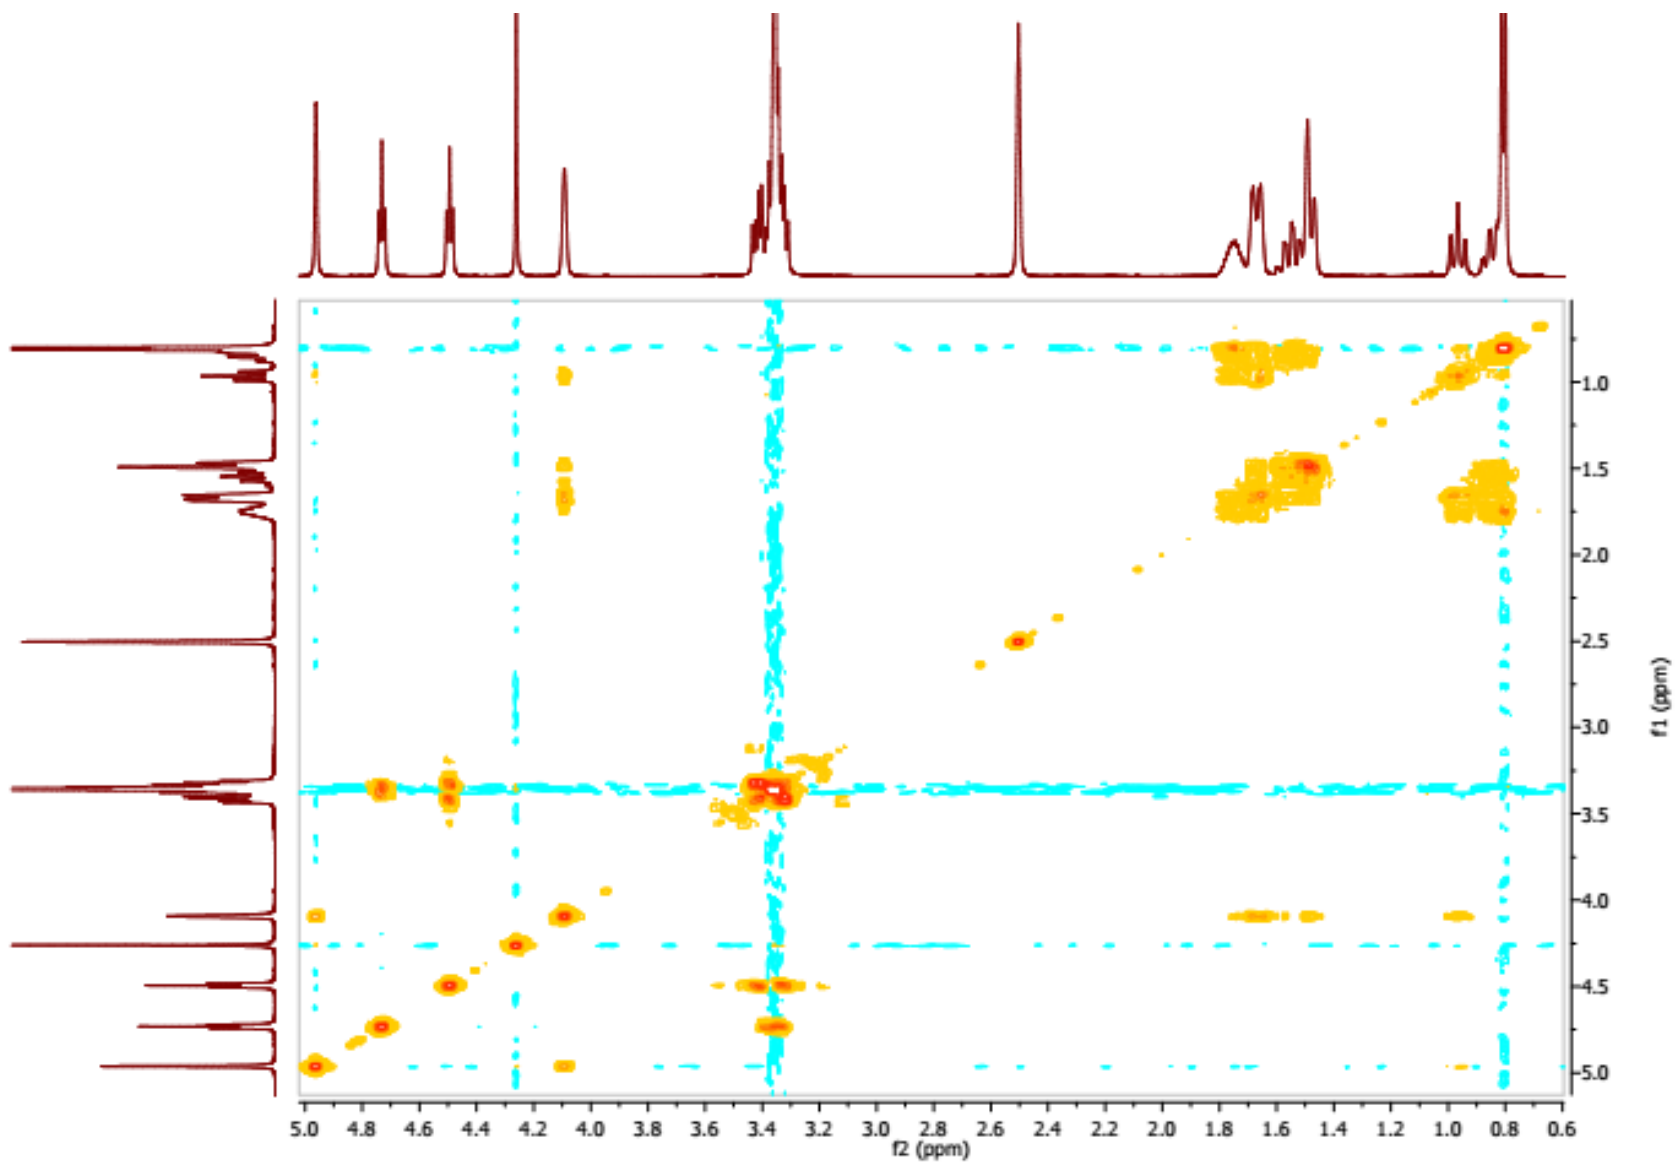

NOESY of compound 37

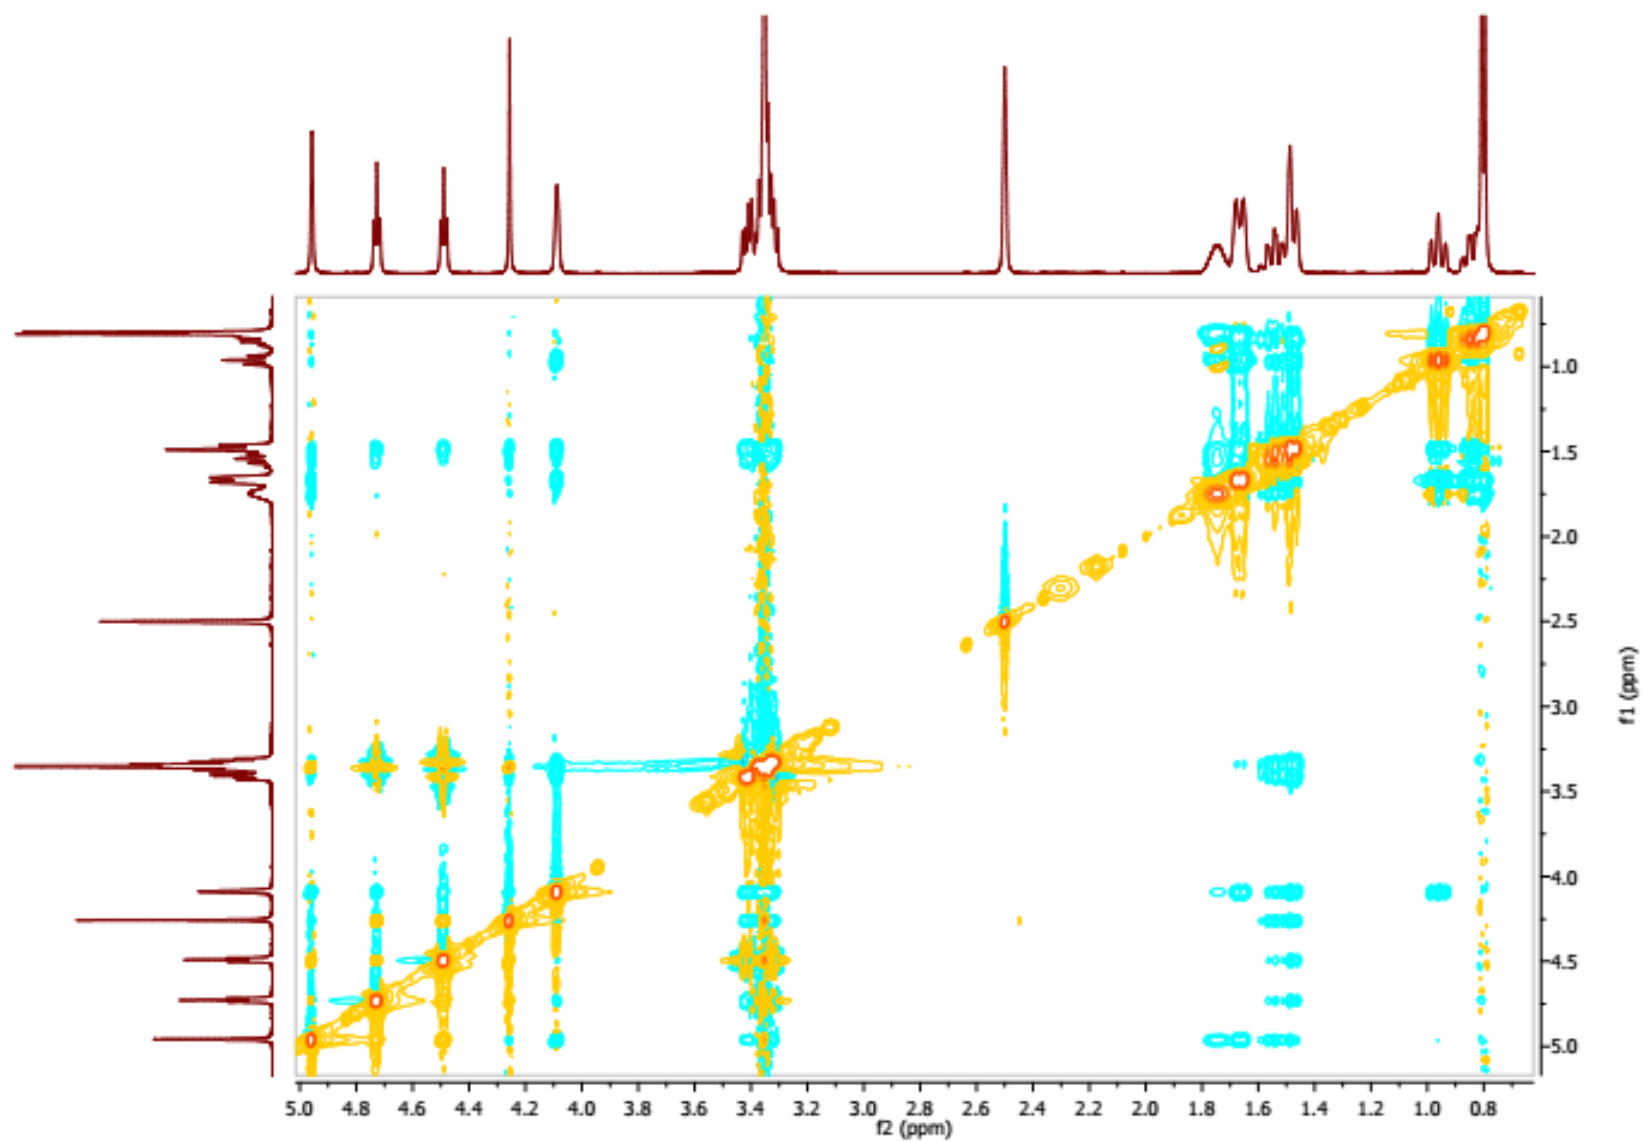

HSQC of compound 37

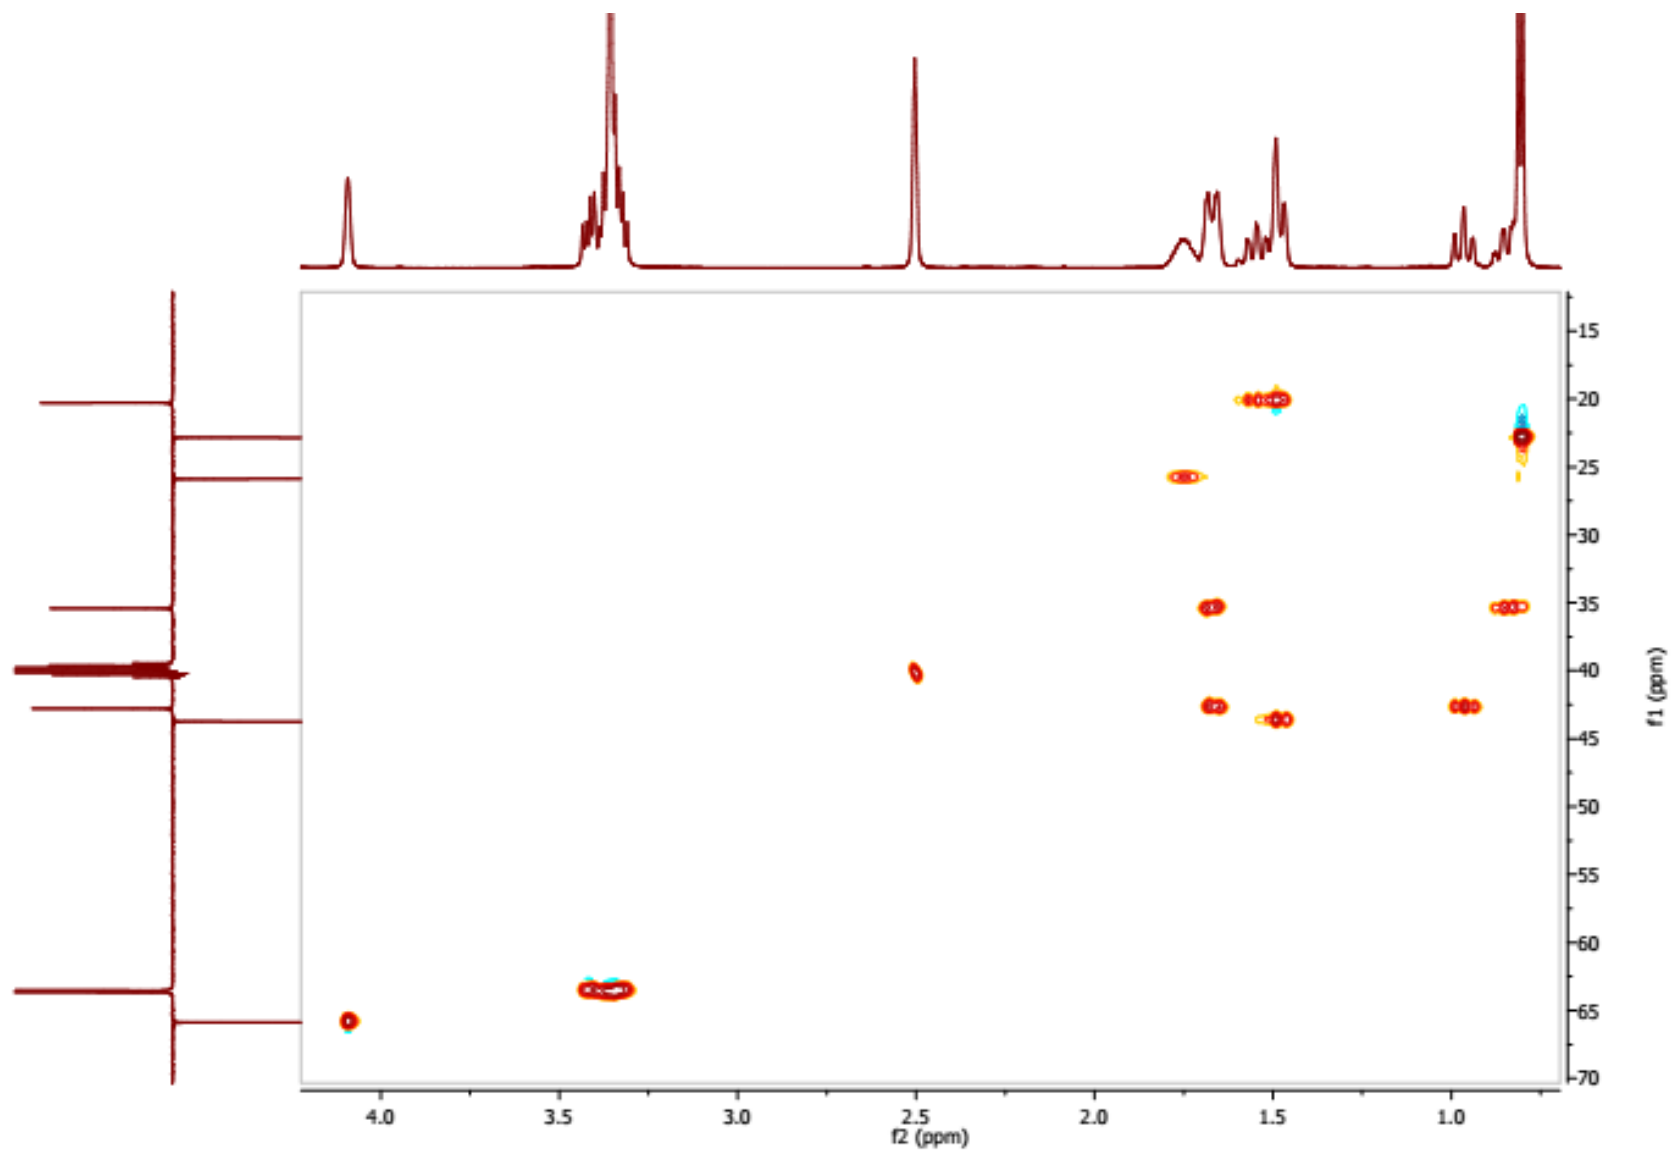

HMBC of compound 37

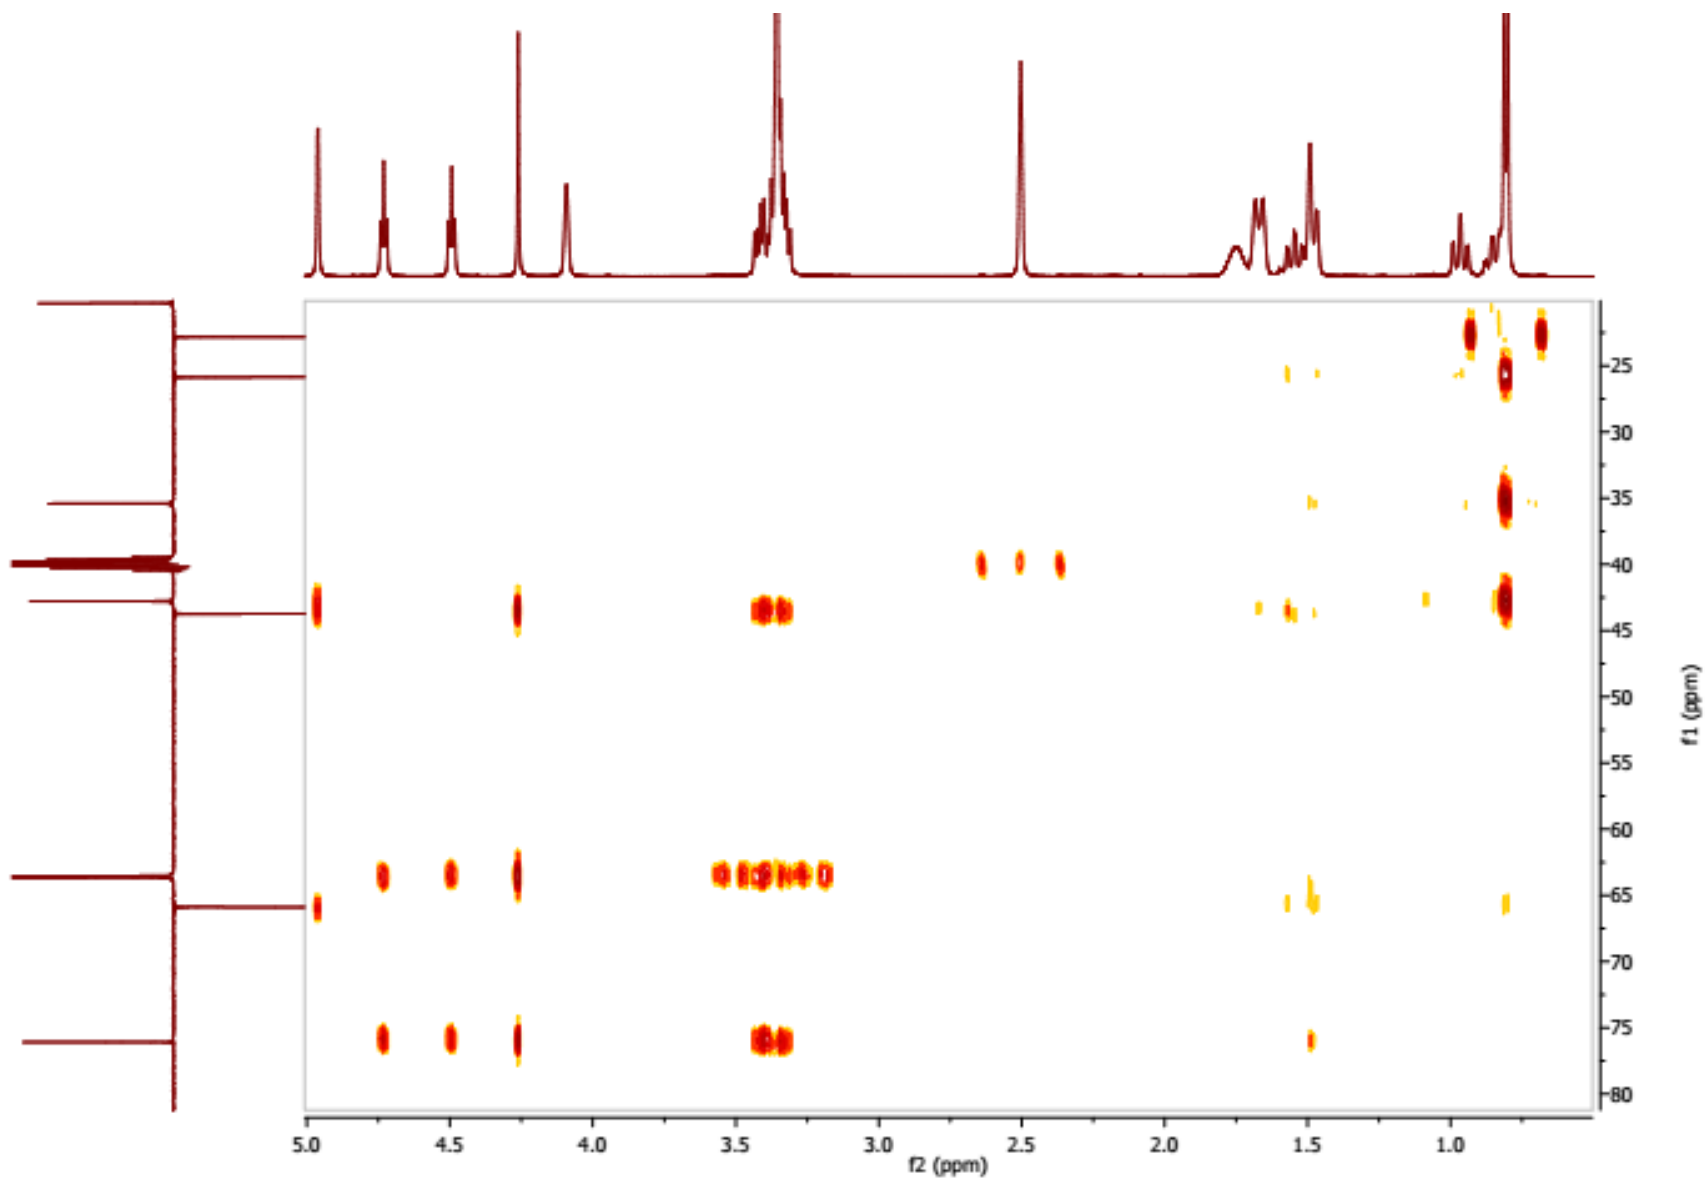

Supplement: s1 [file s1]
